# Supplementary material for: Genome-Wide Analysis on Transcriptome and Methylome in Prevention of Mammary Tumor Induced by Early Life Combined Botanicals
Source: MDPI journal article supplement (doi:10.3390/cells12010014), 2022-12-21
Supplement: s1 [file s1]

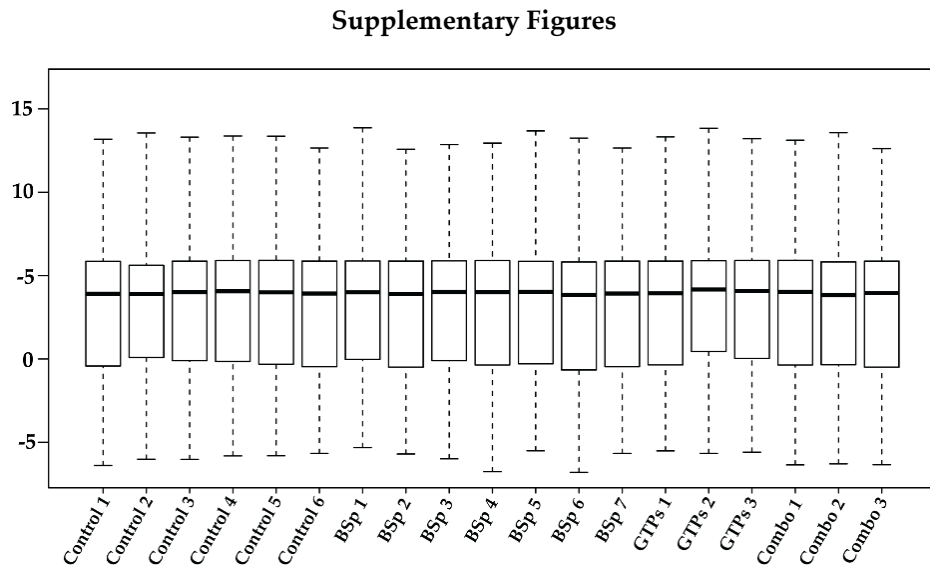

**Figure S1.** Boxplot illustrating sample counts across different treatment group ( $N_{\text{Control}} = 6$ ,  $N_{\text{BSp}} = 7$ ,  $N_{\text{GTPs}} = 3$ ,  $N_{\text{Combination}} = 3$ ) with no sample outliers.

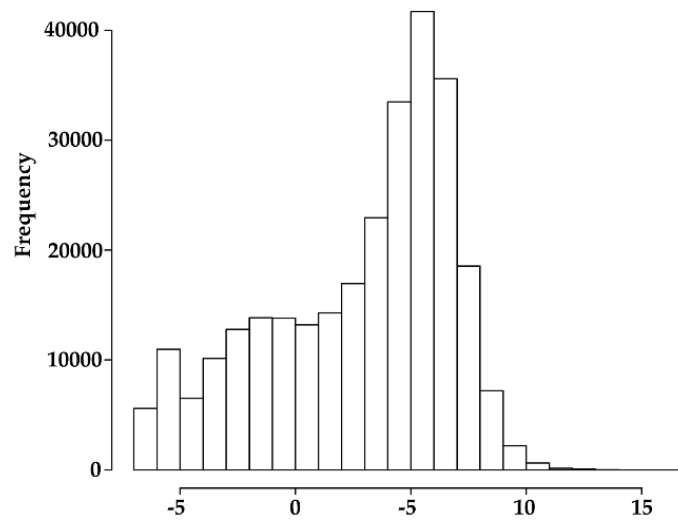

**Figure S2.** Histogram demonstrating normal distribution of total feature counts across different samples. Y-axis represents the total frequency across 19 samples and X-represents total feature by counts.

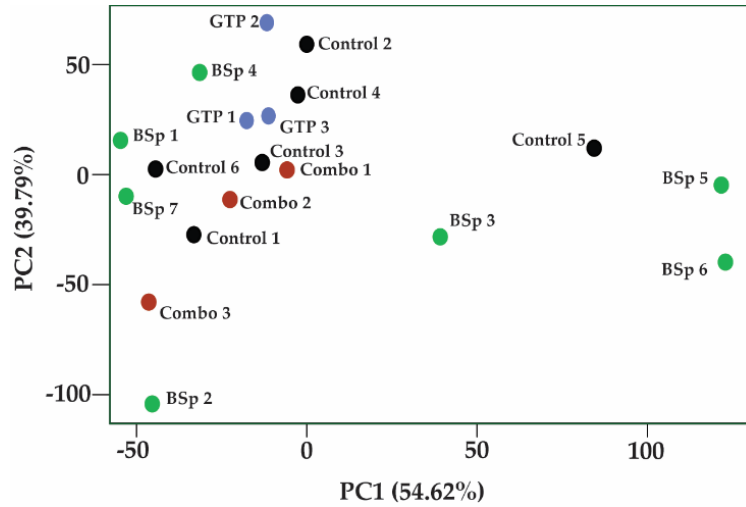

**Figure S3.** Normalized PCA across PC1 (54.62%) v/s PC2 (39.79%) using BSp, GTPs and Combination (BSp + GTPs) induced differentially expressed genes (DEGs).

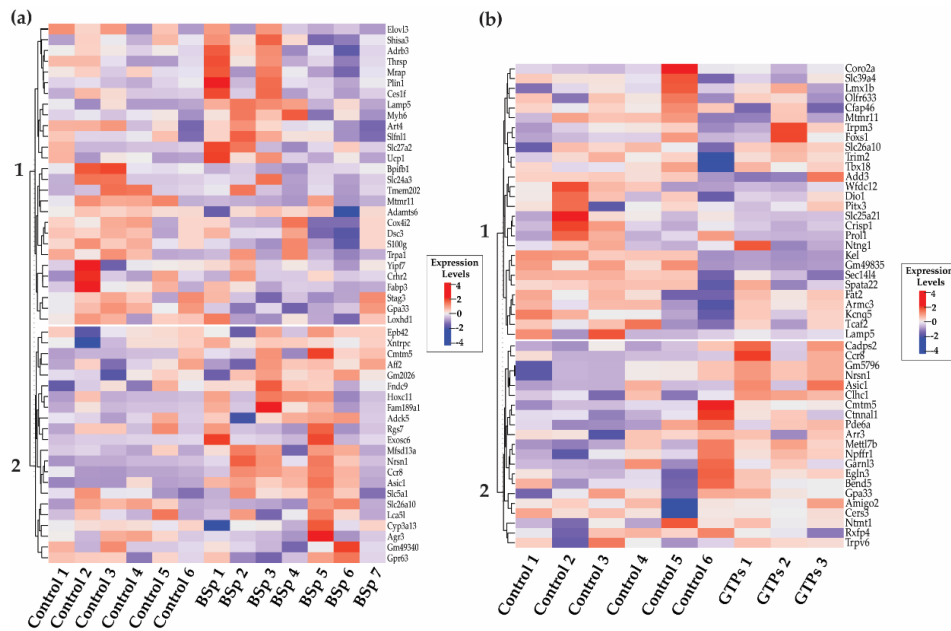

**Figure S4.** Heatmap representing the top 50 DEGs in (a) BSp treatment group and (b) GTPs treatment group based on  $p$  value. Each row corresponds to differentially expressed transcripts and each column represents biological replicates in control ( $N_{\text{Control}} = 6$ ), BSp ( $N_{\text{BSp}} = 7$ ) and GTPs ( $N_{\text{GTPs}} = 3$ ) treatment group.

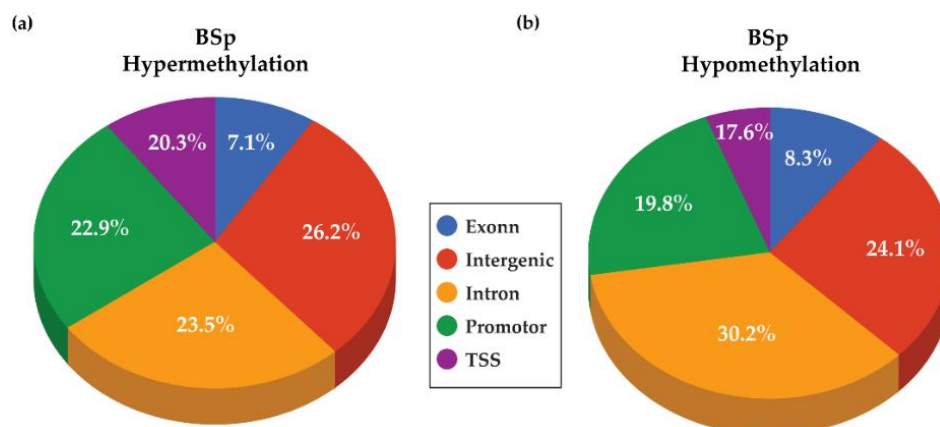

**Figure S5.** Pie charts representing genomic distribution of differentially methylated genes (DMGs) by BSp treatment in (a) hypermethylated regions and (b) hypomethylated regions.

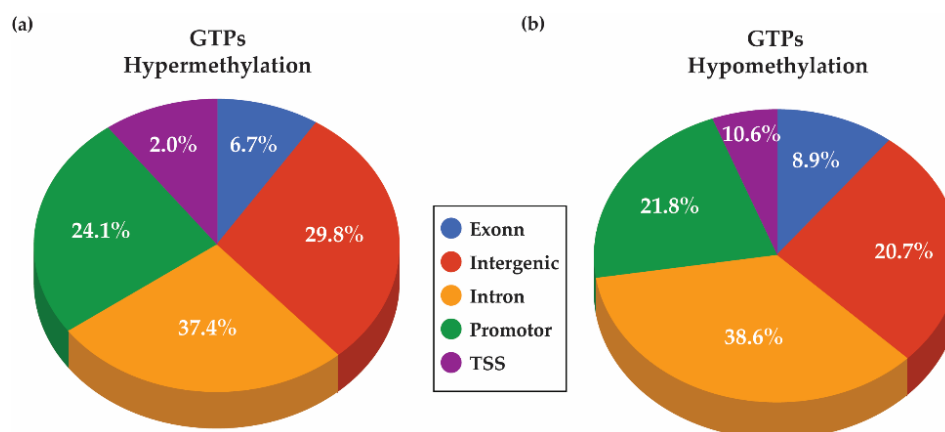

**Figure S6.** Pie charts representing genomic distribution of DMGs by GTPs treatment in (a) hypermethylated regions and (b) hypomethylated regions.

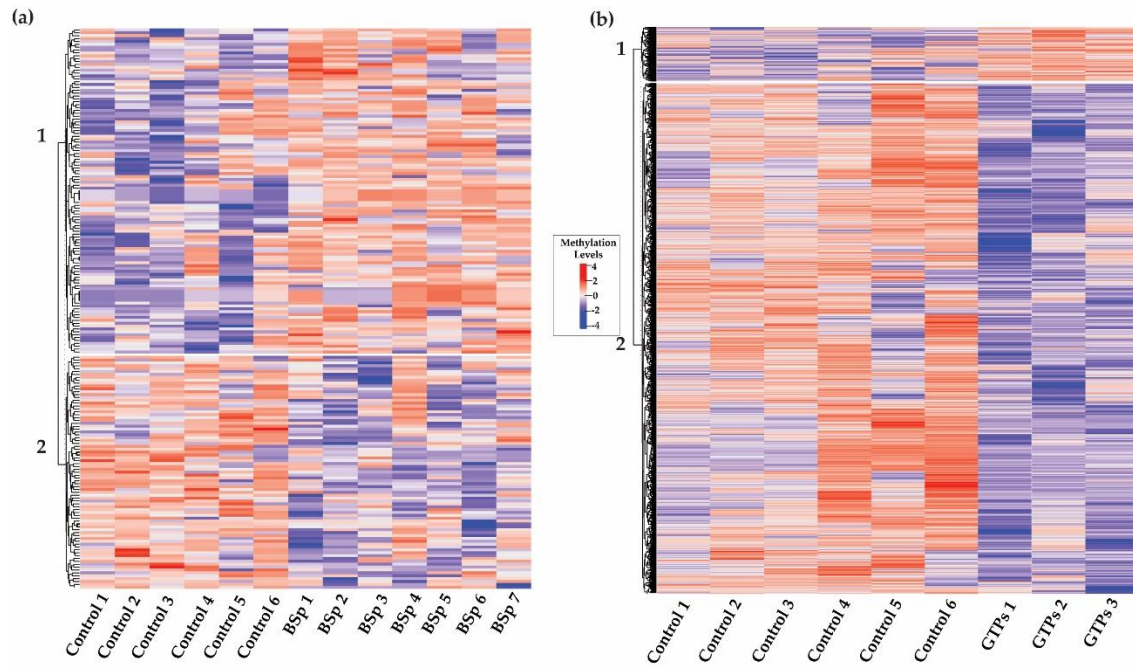

**Figure S7.** Heatmap representing DMGs in (a) BSp treatment group and (b) GTPs treatment group based on q value. Each row corresponds to differentially expressed transcripts and each column represents biological replicates in control ( $N_{\text{Control}} = 6$ ), BSp ( $N_{\text{BSp}} = 7$ ) and GTPs ( $N_{\text{GTPs}} = 3$ ) treatment group across two heatmap clusters (1 and 2).

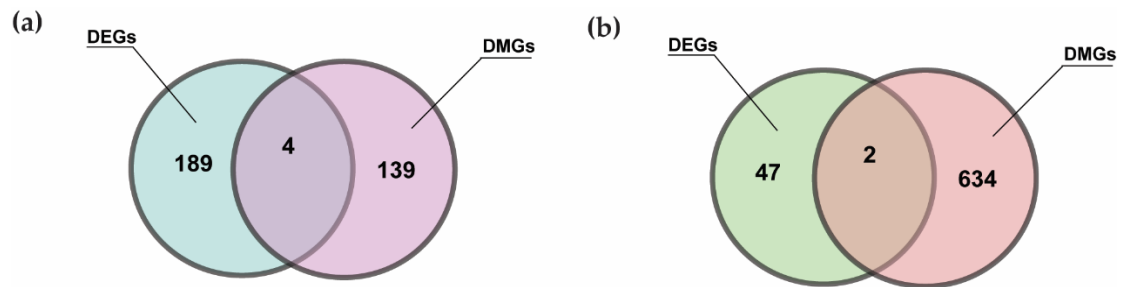

**Figure S8.** Venn diagram representing unique DEGs and DMGs in (a) BSp treatment group and (b) GTPs treatment group.
