# Supplementary material for: Genome-Wide Analysis on Transcriptome and Methylome in Prevention of Mammary Tumor Induced by Early Life Combined Botanicals
Source: Cells. 2022 Dec 21;12(1):14. doi: 10.3390/cells12010014 (PMC9818885; doi:10.3390/cells12010014)
Supplement: Supplementary file 1 [file cells-12-00014-s001.zip]

Archive with 5 entries (5 files):
- Supplementary Figures.pdf
- Supplementary File 1-Transcriptomic level changes in BSp, GTPs and Combo treatment.xlsx
- Supplementary File 2-Global methylation level changes in BSp, GTPs and Combo treatment.xlsx
- Supplementary File 3-Methylation level changes across two different mouse models.xlsx
- Supplementary File List.pdf
