# Supplementary material for: Genome-Wide Analysis on Transcriptome and Methylome in Prevention of Mammary Tumor Induced by Early Life Combined Botanicals
Source: Cells. 2022 Dec 21;12(1):14. doi: 10.3390/cells12010014 (PMC9818885; doi:10.3390/cells12010014)
Supplement: Supplementary file 1 [file cells-12-00014-s001.zip › Supplementary File 1-Transcriptomic level changes in BSp, GTPs and Combo treatment.xlsx]

## Sheet: Table S1_BSp_Ctrl Transcripts
Genes	LogFC	AveExpr	t	P.Value	Adj.P.Val	B	Significant
Exosc6	8.0534	-4.32903	27.4054	4.26582e-16	6.29891e-12	16.0733	YES
Plin1	3.47545	0.315244	9.50273	2.00016e-08	7.3836e-05	9.39027	YES
Cidea	2.86369	1.68262	9.0048	4.48109e-08	0.000132336	8.86984	YES
Gm49340	3.14822	-4.91064	9.65552	1.57066e-08	7.3836e-05	8.68882	YES
Slc24a3	3.66525	-4.76373	10.3789	5.18005e-09	3.82443e-05	7.98028	YES
Tlr2	0.817873	5.47928	7.77433	3.74939e-07	0.000922726	6.60434	YES
Slc26a10	4.77682	-2.32934	7.60395	5.10988e-07	0.00107789	6.22464	YES
Dgat2	2.0641	2.19558	7.1651	1.15478e-06	0.00189272	5.70436	YES
Parp6	1.09831	3.21158	7.01404	1.53817e-06	0.00189272	5.30885	YES
Ucp1	7.64127	-2.39767	6.86844	2.03363e-06	0.0021449	5.14424	YES
Xntrpc	-5.8766	-0.887738	-7.07918	1.35877e-06	0.00189272	5.10587	YES
Fam81a	2.14852	2.10816	6.74923	2.56151e-06	0.00231697	4.90458	YES
Tmem202	3.84514	-4.92151	7.02683	1.50108e-06	0.00189272	4.87997	YES
Crisp4	2.06246	-4.83675	6.93324	1.79535e-06	0.00203924	4.87377	YES
Gm28778	2.29459	-5.29584	7.14432	1.20101e-06	0.00189272	4.66137	YES
Lamp5	-2.49173	-5.11484	-6.72839	2.66751e-06	0.00231697	4.25855	YES
Agr3	3.60025	-4.38658	6.53516	3.89558e-06	0.00319568	4.18526	YES
Gm3526	2.77502	-5.0736	6.77214	2.45006e-06	0.00231697	4.09741	YES
Adck5	-7.4284	-1.05041	-6.44715	4.6367e-06	0.00360345	4.06402	YES
Myh6	-3.29286	-2.20804	-6.35186	5.60557e-06	0.00394151	3.96058	YES
Bend5	-1.51296	3.21506	-6.24571	6.93476e-06	0.00445212	3.87357	YES
Olig1	2.32967	-5.224	6.41406	4.95184e-06	0.00365594	3.74266	YES
Grm6	2.21739	-4.22787	6.2734	6.55932e-06	0.0044025	3.7205	YES
Gpa33	3.56669	-0.27768	5.89463	1.41666e-05	0.00804555	3.32024	YES
Slc5a1	-2.86655	1.3894	-5.85819	1.52708e-05	0.00835143	3.24445	YES
Gm9833	2.48205	-5.09708	6.22288	7.26085e-06	0.00446724	3.17214	YES
Lctl	1.65615	-0.408311	5.8154	1.66817e-05	0.00878808	3.16579	YES
Spata22	2.66091	-4.36343	6.11233	9.07963e-06	0.00536279	3.05131	YES
Elovl3	4.44535	-4.23159	5.78256	1.78547e-05	0.00878808	2.9519	YES
Mrap	4.34036	-3.0273	5.71375	2.05964e-05	0.00981051	2.88762	YES
Tspyl3	1.07145	2.4007	5.65482	2.32874e-05	0.0104201	2.72649	YES
Fabp3	3.89895	0.310646	5.5865	2.68647e-05	0.0116672	2.68328	YES
Cmtm5	-1.84469	-5.32905	-5.78647	1.77108e-05	0.00878808	2.46477	YES
Med12	-0.979295	5.7532	-5.68202	2.2003e-05	0.010153	2.44547	YES
Gpr63	-2.49747	-2.09254	-5.40766	3.91544e-05	0.0149477	2.28553	YES
Stag3	6.36794	-0.175329	5.36878	4.25168e-05	0.0149477	2.21534	YES
Tmem232	1.45464	-5.02744	5.40195	3.96302e-05	0.0149477	2.17717	YES
Adamts6	-5.01142	-1.30191	-5.37214	4.2215e-05	0.0149477	2.16834	YES
Otc	1.97687	-5.19598	5.44131	3.64649e-05	0.0149477	2.1135	YES
Mtmr11	5.45924	-2.6325	5.32571	4.65888e-05	0.0152873	2.09588	YES
Pax4	1.53505	-5.1984	5.38837	4.07873e-05	0.0149477	2.063	YES
Ccr8	-2.44976	-4.76657	-5.29489	4.97467e-05	0.0159687	1.90804	YES
Gm136	2.24305	-4.87701	5.17637	6.40786e-05	0.0185526	1.82779	YES
Trpv6	0.898066	6.93259	5.41573	3.84909e-05	0.0149477	1.81815	YES
Ammecr1	-0.611783	6.14216	-5.41591	3.8477e-05	0.0149477	1.81644	YES
Slfnl1	-2.14457	-4.37887	-5.27765	5.16077e-05	0.016021	1.80566	YES
Fat2	1.51298	4.03783	5.32649	4.65115e-05	0.0152873	1.80427	YES
Fam189a1	-1.8643	-5.16601	-5.35382	4.3888e-05	0.0150709	1.78049	YES
AU018091	1.30977	3.49098	5.27338	5.20797e-05	0.016021	1.7657	YES
Cox7a1	1.70329	1.0697	5.10388	7.48652e-05	0.0208577	1.66732	YES
Kcnk3	2.46804	-0.655531	5.01871	8.99436e-05	0.0233001	1.58413	YES
Fabp4	2.92667	4.33634	5.21894	5.84987e-05	0.0172758	1.52139	YES
Crhr2	-2.09866	-3.52004	-5.05094	8.39016e-05	0.0226168	1.49191	YES
Aff2	-2.33899	-0.36038	-4.97291	9.93002e-05	0.0252805	1.4915	YES
Tnnt2	1.13778	5.98156	5.25285	5.44108e-05	0.0163965	1.45004	YES
Gm10718	2.05437	-5.01037	5.04194	8.55455e-05	0.0226168	1.43971	YES
Trim2	0.623924	6.3095	5.13734	6.96722e-05	0.0197842	1.29181	YES
Adrb3	3.77705	-2.04808	4.84697	0.000130492	0.0310782	1.23936	YES
Gadd45g	0.72628	4.60827	5.04071	8.57742e-05	0.0226168	1.14345	YES
Gm2026	-4.65398	-2.44754	-4.81629	0.000139502	0.0321858	1.13905	YES
Msc	1.58603	1.77293	4.8816	0.000121031	0.0297857	1.08475	YES
Slc4a8	1.82342	3.40287	4.94707	0.000105011	0.0262812	1.08136	YES
Cd300e	1.54637	-3.15825	4.74173	0.000164132	0.0337334	1.0107	YES
Slc27a2	3.38469	-4.60588	4.77603	0.000152294	0.0337334	0.991765	YES
Mapk15	1.76872	2.05364	4.85157	0.000129193	0.0310782	0.945856	YES
Ces1f	4.57991	-4.16066	4.70054	0.000179592	0.0358358	0.922635	YES
Cers1	1.72508	0.235716	4.68818	0.000184516	0.0363275	0.860269	YES
Dsc3	3.46124	3.50591	4.75024	0.000161111	0.0337334	0.719149	YES
Fbxw10	2.72414	-4.8207	4.60599	0.000220931	0.0412946	0.672008	YES
Iqcf1	1.66004	-5.25148	4.60828	0.000219824	0.0412946	0.637589	YES
Zfp993	-1.42636	-0.311261	-4.53421	0.000258677	0.0462187	0.603311	YES
Rbm7	0.759021	5.2526	4.83261	0.000134631	0.031555	0.585569	YES
Cyp3a13	-1.53885	-3.25351	-4.49154	0.000284148	0.0466192	0.504999	YES
Chordc1	0.686713	5.97872	4.80294	0.000143616	0.0326252	0.485142	YES
Msantd2	0.734805	4.28476	4.74074	0.000164487	0.0337334	0.462978	YES
Hoxc11	-2.88047	-5.05582	-4.49901	0.000279509	0.0466192	0.462706	YES
Cln8	0.799917	5.02582	4.75308	0.000160114	0.0337334	0.452189	YES
Asic1	-3.06065	-4.15953	-4.47182	0.000296763	0.0476305	0.432656	YES
Fndc9	-2.00591	-3.26297	-4.44159	0.000317218	0.0498302	0.415975	YES
Slc26a2	-0.772162	5.86022	-4.75195	0.000160509	0.0337334	0.406598	YES
Gm7324	0.730937	2.8509	4.6151	0.000216561	0.0412946	0.394486	YES
Nrsn1	-1.88984	-5.17643	-4.49326	0.000283075	0.0466192	0.375071	YES
Thrsp	5.21799	0.480938	4.5097	0.000273009	0.0466192	0.337462	YES
Ubl5	0.724208	6.42859	4.74086	0.000164443	0.0337334	0.332521	YES
Wtip	0.531482	5.75058	4.72219	0.000171289	0.0346473	0.306941	YES
Rspo2	1.83757	-5.08556	4.37614	0.000366534	0.0535865	0.207201	YES
Afg1l	0.653331	3.1861	4.51204	0.000271605	0.0466192	0.203354	YES
Pate10	1.80915	-5.32265	4.39141	0.000354376	0.0532393	0.184609	YES
Slc2a5	1.71038	-1.51817	4.30776	0.000426368	0.0593939	0.135958	YES
Tm6sf2	1.06769	0.935783	4.36974	0.000371752	0.0538165	0.100206	YES
Arhgap6	-1.37786	3.65953	-4.46597	0.000300614	0.0477297	0.0833983	YES
Epb42	-3.01252	-3.43742	-4.27404	0.000459418	0.0628126	0.0688444	YES
Pianp	1.80158	5.94595	4.62386	0.000212439	0.0412746	0.0669254	YES
Rnf148	1.60646	-2.49747	4.26104	0.00047284	0.0634724	0.0621295	YES
Med14	-0.563239	7.05563	-4.56113	0.000243808	0.0450008	0.0612033	YES
Mfsd13a	-1.65892	2.58551	-4.3812	0.000362456	0.0535202	0.00914276	YES
Pdk4	1.90879	2.85867	4.38813	0.000356948	0.0532393	-0.0289525	YES
Zfp36l2	-0.577692	8.06392	-4.53685	0.000257176	0.0462187	-0.0647647	YES
Tas2r143	2.24627	-4.61142	4.19704	0.000544922	0.0707224	-0.0694229	YES
Lrrc66	1.93679	-0.657788	4.19614	0.000546008	0.0707224	-0.0904711	YES
Cdk6	1.36083	6.08252	4.53204	0.000259911	0.0462187	-0.113287	YES
Trpa1	3.24898	-3.51036	4.16453	0.000585683	0.0727497	-0.131858	YES
Il34	-1.06782	3.08122	-4.34081	0.000396307	0.0561918	-0.133032	YES
Aldh1l1	2.14655	0.259023	4.22888	0.000507778	0.066945	-0.134061	YES
Glis2	-0.781061	6.29734	-4.5268	0.000262927	0.0462187	-0.164059	YES
Foxn3	0.538775	6.09028	4.49192	0.000283907	0.0466192	-0.168586	YES
Atrx	-0.675934	7.9909	-4.48246	0.000289886	0.0470381	-0.225172	YES
Cfap46	1.41089	-4.24243	4.12024	0.000646203	0.0778249	-0.233491	YES
Ntng1	2.35379	3.45824	4.3371	0.000399576	0.0561918	-0.234371	YES
Sec14l4	2.4065	-1.60219	4.10391	0.00067007	0.0788718	-0.262901	YES
Kif13a	-0.750351	5.09168	-4.42505	0.000329007	0.0511381	-0.290783	YES
Tnni3	-1.11366	2.38708	-4.14687	0.000609094	0.0743296	-0.300245	YES
Cox4i2	3.31132	2.3352	4.29134	0.000442157	0.0610177	-0.308948	YES
Ankle1	0.709297	2.83253	4.26415	0.000469594	0.0634724	-0.314592	YES
Adig	2.20232	-0.736651	4.09555	0.000682636	0.0793685	-0.344215	YES
Lin28a	1.66945	-4.81121	4.05382	0.000748968	0.0831523	-0.355753	YES
Upf3b	-0.43729	5.8471	-4.39267	0.00035339	0.0532393	-0.376441	YES
Armc3	1.97117	-3.70852	4.03952	0.000773154	0.0839052	-0.378618	YES
Cntd1	2.66075	0.0276675	4.11341	0.000656073	0.0781256	-0.382679	YES
Shisa3	-1.63931	-2.83267	-4.03644	0.000778478	0.0839052	-0.38468	YES
Msantd4	0.460768	5.78796	4.40642	0.000342823	0.0527305	-0.38775	YES
Slc35f2	1.49583	-0.453324	4.0788	0.00070852	0.0806475	-0.404033	YES
Samd13	2.39759	-2.30277	4.03295	0.000784535	0.0839452	-0.407939	YES
Loxhd1	3.42146	-3.77985	4.02261	0.000802773	0.0842278	-0.427063	YES
Capn8	2.90466	-4.04778	4.00569	0.00083356	0.0843037	-0.447827	YES
Cdipt	-0.96352	3.05985	-4.1776	0.000568945	0.0718038	-0.46745	YES
Gm12689	-1.48797	-1.94009	-3.99074	0.000861748	0.0853998	-0.479086	YES
Lca5l	-1.64321	-0.644591	-4.00582	0.000833317	0.0843037	-0.495917	YES
Rgs7	3.85961	-4.3706	3.96819	0.000906071	0.0863164	-0.520833	YES
Spag4	1.14294	0.035584	4.042	0.0007689	0.0839052	-0.520871	YES
Oga	-0.700023	6.56254	-4.33927	0.000397659	0.0561918	-0.524514	YES
Bpifb1	3.3623	-2.5876	3.97305	0.000896321	0.085942	-0.534539	YES
Foxf2	1.70412	2.73549	4.16029	0.000591221	0.0727497	-0.546468	YES
S100g	4.66273	-0.810096	3.96404	0.00091447	0.0865581	-0.597239	YES
Rbm41	-0.877137	3.62756	-4.1188	0.000648277	0.0778249	-0.643278	YES
Pcdha5	2.72166	-4.70902	3.89646	0.00106286	0.0928651	-0.675403	YES
Nat8l	1.87355	-0.353154	3.945	0.000954039	0.0895971	-0.684205	YES
Aspa	2.55004	1.89664	4.0433	0.000766688	0.0839052	-0.701875	YES
Rpl39l	1.22206	-1.77323	3.8647	0.0011407	0.0957018	-0.745912	YES
Fam160b1	-1.02694	3.4095	-4.01237	0.000821264	0.0842278	-0.751857	YES
Cd72	0.745525	4.28305	4.18393	0.00056101	0.0718038	-0.766632	YES
Yipf7	-3.04333	-2.54785	-3.83535	0.00121771	0.0980018	-0.784019	YES
Zglp1	1.70844	-0.343819	3.91142	0.00102806	0.0928651	-0.784353	YES
C1ql1	-1.21751	1.0378	-3.91621	0.00101716	0.0927119	-0.805029	YES
Fstl4	-1.4912	-3.01087	-3.82307	0.00125145	0.0982917	-0.806378	YES
Rps6ka3	-0.503516	7.10482	-4.23849	0.000497067	0.0661233	-0.815191	YES
Pde6a	-1.46779	0.21247	-3.89095	0.00107597	0.0929109	-0.820374	YES
Art4	-3.34957	-2.30705	-3.81403	0.00127686	0.099232	-0.823911	YES
Obox1	-1.15967	-5.35416	-3.83338	0.00122304	0.0980018	-0.834755	YES
Pitx3	1.73522	-3.98485	3.80569	0.0013008	0.099521	-0.84089	YES
Plaur	-0.906827	4.34612	-4.10193	0.000673023	0.0788718	-0.85442	YES
Olfr683	-1.37769	-5.13227	-3.78598	0.00135912	0.101872	-0.885374	NO
Suclg1	0.467293	5.70805	4.16324	0.000587367	0.0727497	-0.901124	YES
Gm34653	-1.46371	-1.38161	-3.79506	0.00133192	0.101198	-0.916535	NO
Agtrap	-0.487281	6.14038	-4.18014	0.000565737	0.0718038	-0.921495	YES
Clhc1	-2.2612	-3.56754	-3.76116	0.00143628	0.105124	-0.927501	NO
Kcnq5	2.34903	0.0451049	3.80747	0.00129563	0.099521	-0.941717	YES
Gckr	2.53266	-2.34115	3.76982	0.00140886	0.105067	-0.977748	NO
Btn2a2	-2.316	-2.54536	-3.74094	0.00150238	0.106316	-0.977811	NO
Pnma2	-1.50165	-2.05201	-3.74021	0.00150481	0.106316	-0.982581	NO
Snx29	-0.717433	2.06526	-3.86777	0.00113292	0.0957018	-1.00086	YES
Fam118b	0.572009	4.43192	4.09165	0.000688567	0.0794326	-1.00146	YES
Fkbp15	-0.648005	4.68975	-4.07785	0.000710021	0.0806475	-1.00697	YES
Osbp2	1.2264	1.8591	3.89726	0.00106096	0.0928651	-1.03725	YES
Zic3	-2.18201	-4.61564	-3.70504	0.00162728	0.109719	-1.03894	NO
Vps13d	-0.896645	4.29688	-4.0123	0.000821401	0.0842278	-1.06254	YES
Gm9774	2.96216	-2.81999	3.73026	0.0015385	0.107666	-1.0634	NO
Spink8	-2.68339	-3.6366	-3.6875	0.00169201	0.112542	-1.07094	NO
Esyt2	-0.927172	5.1899	-4.06234	0.000734925	0.0822113	-1.07486	YES
Uckl1	-0.895889	2.31354	-3.85228	0.00117266	0.097278	-1.09515	YES
Sostdc1	2.90667	-1.24135	3.73436	0.00152453	0.107196	-1.09568	NO
Ampd3	-0.831995	3.72554	-3.90163	0.00105071	0.0928651	-1.11905	YES
Slc1a2	-1.59456	0.602564	-3.74679	0.00148295	0.106316	-1.12192	NO
Olfr6	-1.20809	-1.4157	-3.66053	0.00179659	0.117382	-1.1482	NO
Taf1	-0.905388	5.05883	-3.99969	0.000844749	0.0847109	-1.14937	YES
Ripply1	-1.68197	-2.72461	-3.63814	0.00188828	0.119751	-1.1813	NO
Bdkrb2	1.3546	4.3737	3.97359	0.00089526	0.085942	-1.18172	YES
Tanc2	-0.782881	6.92035	-4.06533	0.000730055	0.0822113	-1.1878	YES
Decr1	0.392555	5.19414	4.0155	0.000815582	0.0842278	-1.19343	YES
Exoc2	-0.437239	4.98611	-4.01312	0.000819895	0.0842278	-1.2045	YES
Rab38	1.5465	1.05085	3.71214	0.00160179	0.109719	-1.21525	NO
Tmem243	0.54223	4.38846	3.99741	0.00084906	0.0847109	-1.22135	YES
Slc24a2	2.7453	-0.0759926	3.70523	0.00162661	0.109719	-1.23806	NO
Cpn2	1.26071	-2.05845	3.6207	0.00196294	0.121275	-1.23893	NO
Tmem92	2.29972	-4.01794	3.59848	0.00206226	0.122745	-1.25626	NO
Spns2	-0.585741	6.26699	-4.01415	0.000818022	0.0842278	-1.26151	YES
Hmgn5	-0.615904	6.1108	-3.97808	0.000886359	0.085942	-1.27221	YES
Ttc37	-0.551673	4.67672	-3.93223	0.000981543	0.0905842	-1.29924	YES
Kcns3	3.0656	-1.73514	3.63538	0.00189993	0.11989	-1.30679	NO
Mrpl53	0.591717	5.16117	3.97595	0.000890554	0.085942	-1.30758	YES
Rpap1	-0.800207	5.02663	-3.90146	0.0010511	0.0928651	-1.33196	YES
Arglu1	0.533144	5.41448	3.97426	0.000893924	0.085942	-1.33258	YES
Phf21b	0.734803	1.57343	3.71015	0.00160888	0.109719	-1.34696	NO
Csn1s2b	2.01263	-3.80551	3.55754	0.00225856	0.127855	-1.35028	NO
Nudt19	-0.716368	1.90806	-3.70249	0.00163654	0.109841	-1.36876	NO
Ccna1	1.626	-0.885727	3.56576	0.00221774	0.126682	-1.38378	NO
Slc34a3	2.67235	-3.73682	3.53973	0.00234967	0.129944	-1.39369	NO
Zzef1	-0.616233	4.22687	-3.83229	0.00122602	0.0980018	-1.3969	YES
Wwox	-0.43976	3.83644	-3.79195	0.00134118	0.101198	-1.41271	NO
Deptor	-0.81961	4.26725	-3.84949	0.00117997	0.097338	-1.43907	YES
Zfp865	-0.469709	3.90512	-3.80681	0.00129754	0.099521	-1.45047	YES
Coro2a	-0.744914	5.49627	-3.89977	0.00105506	0.0928651	-1.45236	YES
Ccdc6	0.328522	6.70772	3.92269	0.00100259	0.0919523	-1.45291	YES
Trim8	-0.307449	6.7811	-3.94281	0.000958712	0.0895971	-1.46019	YES
Acsbg1	1.04417	5.50793	3.90089	0.00105244	0.0928651	-1.46238	YES
Cnga2	-3.49574	-4.24814	-3.48453	0.00265568	0.140049	-1.46299	NO
Ankhd1	-0.87424	6.27268	-3.93818	0.00096862	0.0899538	-1.466	YES
Vat1l	3.1148	-4.67576	3.46685	0.00276185	0.143805	-1.49853	NO
Smad9	1.53664	0.724226	3.6013	0.00204937	0.122686	-1.51995	NO
Nxpe4	1.30339	-0.698935	3.54042	0.00234604	0.129944	-1.52024	NO
Ccdc134	-0.681708	4.06886	-3.75654	0.00145111	0.105553	-1.52279	NO
F2	1.43321	-4.98451	3.44808	0.00287907	0.146091	-1.5313	NO
Nodal	-1.02358	-5.18745	-3.44443	0.00290249	0.146274	-1.53892	NO
Bdkrb1	1.84248	0.346104	3.57206	0.00218691	0.126635	-1.54051	NO
Rab11a	0.58878	6.54454	3.86538	0.00113898	0.0957018	-1.55036	YES
Col26a1	2.36811	-3.62587	3.44965	0.00286912	0.146091	-1.55538	NO
Srprb	0.437104	5.97137	3.86538	0.00113898	0.0957018	-1.57735	YES
Atp6v1e1	0.665039	7.11899	3.8937	0.00106941	0.0928874	-1.57912	YES
Olfr1257	1.15633	-4.17771	3.43736	0.00294826	0.146674	-1.57965	NO
Pgf	-1.26535	5.67691	-3.83992	0.00120537	0.0980018	-1.58376	YES
Zbtb44	0.395933	6.23464	3.83023	0.00123166	0.0980018	-1.58481	YES
Neil1	0.585731	4.01512	3.79125	0.00134328	0.101198	-1.59466	NO
Mbnl3	-0.786051	4.06044	-3.74734	0.00148113	0.106316	-1.59561	NO
Slc16a3	0.643386	7.28739	3.88832	0.00108227	0.092912	-1.59827	YES
Fam199x	-0.350628	5.25027	-3.8292	0.00123448	0.0980018	-1.60761	YES
Plekhg5	-0.754432	5.87545	-3.86055	0.00115127	0.0960436	-1.61661	YES
Trpm3	-0.726555	1.73392	-3.56796	0.00220689	0.126682	-1.64588	NO
Trpm8	1.92396	-5.04238	3.38772	0.00329056	0.149044	-1.64823	NO
Armc12	1.6114	-5.25157	3.39143	0.00326369	0.149044	-1.64942	NO
Ahnak	-0.625252	10.3397	-3.83627	0.00121521	0.0980018	-1.64979	YES
Trio	-0.618669	5.66911	-3.76059	0.00143811	0.105124	-1.66376	NO
Ambn	-1.00545	-5.41247	-3.37304	0.00339913	0.149738	-1.67407	NO
Dapp1	0.391048	4.36401	3.74315	0.00149501	0.106316	-1.67574	NO
Paqr9	2.4001	-2.27055	3.42842	0.00300723	0.147036	-1.67869	NO
Tmem8b	-0.554529	3.36742	-3.68255	0.00171074	0.113277	-1.68356	NO
Slc37a3	0.364107	6.24211	3.81652	0.0012698	0.0992058	-1.69557	YES
Olfr796	1.14083	-3.0895	3.39918	0.00320821	0.149044	-1.70065	NO
Capn6	-5.15148	-0.363045	-3.3775	0.00336575	0.149695	-1.70956	NO
Aasdhppt	0.421074	4.50491	3.70859	0.00161448	0.109719	-1.71274	NO
Emg1	0.435715	6.47582	3.82548	0.00124473	0.0982875	-1.72795	YES
Meig1	1.86203	-5.39339	3.3403	0.00365404	0.151533	-1.73489	NO
Rtn1	-2.40674	0.49598	-3.43404	0.00297002	0.146674	-1.73613	NO
Krt16	2.58332	3.62905	3.70696	0.00162036	0.109719	-1.73637	NO
Ago4	-0.64333	2.85582	-3.58905	0.0021059	0.123396	-1.75132	NO
Mrap2	0.773723	-0.165999	3.41946	0.00306744	0.148269	-1.76406	NO
Alx3	1.26366	-4.88785	3.32615	0.00376997	0.151682	-1.76928	NO
Kcne4	-1.54603	-0.480061	-3.3748	0.00338593	0.149738	-1.78165	NO
Kcnn1	2.04491	-0.215703	3.46619	0.00276585	0.143805	-1.78375	NO
Gm13272	-2.37887	-2.63229	-3.31937	0.00382682	0.152838	-1.78662	NO
Ehmt2	-0.43563	7.76569	-3.7622	0.00143297	0.105124	-1.80514	NO
Cabp7	1.29142	-3.34486	3.32732	0.00376025	0.151682	-1.8096	NO
Erc2	2.55085	-4.28838	3.29487	0.00403932	0.15779	-1.82576	NO
Ankrd49	0.563917	4.0631	3.63783	0.00188961	0.119751	-1.83742	NO
Card10	0.441071	6.3558	3.76245	0.00143216	0.105124	-1.86097	NO
Tbce	-0.936839	3.16967	-3.54082	0.00234397	0.129944	-1.86136	NO
Clptm1l	-0.343296	6.42805	-3.74553	0.00148711	0.106316	-1.87717	NO
AI467606	1.60439	3.6794	3.57878	0.0021545	0.125249	-1.893	NO
Padi3	2.01685	3.73285	3.6397	0.00188174	0.119751	-1.89418	NO
Hinfp	0.42831	5.60412	3.72574	0.00155405	0.108241	-1.89425	NO
Stmnd1	-0.968869	-5.23477	-3.25551	0.00440512	0.163103	-1.89508	NO
Rbmx	-1.16247	4.65033	-3.65799	0.00180677	0.117528	-1.89596	NO
Lars	-0.453519	5.79457	-3.6749	0.00174009	0.114706	-1.89954	NO
Tdp2	-0.758975	5.15251	-3.69603	0.00166022	0.110927	-1.90862	NO
Olfr890	-1.58073	-2.62196	-3.25992	0.00436258	0.163103	-1.92609	NO
Olfr1192-ps1	-1.27627	-3.12174	-3.26422	0.00432144	0.163103	-1.93121	NO
Pparg	2.11446	-0.759024	3.35876	0.00350812	0.149738	-1.93864	NO
Nlrp2	3.19769	-3.55799	3.27291	0.00423951	0.163103	-1.9475	NO
Fam53c	-0.388191	6.40444	-3.71065	0.0016071	0.109719	-1.95305	NO
Papln	-1.6295	2.04547	-3.41278	0.00311314	0.148286	-1.95785	NO
Zkscan6	0.329317	4.37074	3.6507	0.00183631	0.118897	-1.95849	NO
Pkd1	-1.25006	4.82559	-3.60067	0.00205224	0.122686	-1.96344	NO
Xiap	-1.15538	5.43446	-3.64883	0.00184393	0.118897	-1.97038	NO
Angptl8	2.03031	-2.59735	3.2556	0.00440427	0.163103	-1.97477	NO
Pot1a	0.649783	4.43965	3.63302	0.00190992	0.120008	-1.98298	NO
Gins3	0.517861	4.95881	3.66999	0.00175919	0.11545	-1.98771	NO
Pou1f1	-1.156	-1.43473	-3.26535	0.0043107	0.163103	-1.99366	NO
Gm9803	1.50124	2.70541	3.49496	0.00259498	0.138831	-2.01685	NO
Akap17b	-0.686499	2.37403	-3.43086	0.00299102	0.146784	-2.01835	NO
Morn3	-1.75795	0.114142	-3.29992	0.00399459	0.156872	-2.01902	NO
Pus3	0.638375	3.5126	3.55595	0.00226655	0.127855	-2.0311	NO
Ahcyl2	-0.5931	4.63128	-3.59248	0.00208993	0.123396	-2.03559	NO
Tanc1	-0.735804	4.9741	-3.62335	0.0019514	0.121275	-2.03909	NO
Pheta1	0.428737	5.21832	3.6384	0.00188721	0.119751	-2.04435	NO
Acad8	0.393884	4.22194	3.59683	0.00206985	0.122745	-2.05253	NO
Rab26	-0.829601	1.42953	-3.36446	0.00346416	0.149738	-2.05616	NO
Pax7	-1.38432	-5.03288	-3.16946	0.0053219	0.180362	-2.05682	NO
Foxl1	-1.28652	-1.64987	-3.23188	0.0046402	0.165102	-2.05763	NO
Smim24	0.881659	1.37194	3.39421	0.00324372	0.149044	-2.0591	NO
Pif1	0.814308	4.8392	3.62244	0.00195537	0.121275	-2.06068	NO
Epha3	1.35137	2.01621	3.36446	0.00346422	0.149738	-2.06341	NO
Trpv5	1.79761	-2.47305	3.21692	0.00479531	0.168878	-2.06579	NO
Tmem45b	2.44535	-1.32033	3.25189	0.00444038	0.163103	-2.07329	NO
Mon1a	0.472141	4.36141	3.54456	0.00232462	0.129944	-2.08076	NO
Syk	0.876085	4.3061	3.58921	0.00210517	0.123396	-2.08213	NO
Tnfrsf8	-1.006	-5.12997	-3.14168	0.00565593	0.18215	-2.10458	NO
Lingo2	-1.02136	-5.17439	-3.14018	0.00567447	0.18215	-2.10536	NO
Cstad	-1.3933	-1.68669	-3.17889	0.00521288	0.178179	-2.11151	NO
Exog	0.753664	3.98229	3.55554	0.00226859	0.127855	-2.11342	NO
Ptdss1	-0.570695	5.63195	-3.62581	0.00194076	0.121275	-2.11875	NO
Kcna7	-0.668006	1.50028	-3.32678	0.00376478	0.151682	-2.12305	NO
Gsdmd	0.746225	3.45975	3.48745	0.00263855	0.140049	-2.12749	NO
Entpd3	1.17935	1.01861	3.3279	0.00375547	0.151682	-2.13254	NO
Rbp2	1.60529	0.76842	3.31887	0.00383109	0.152838	-2.13437	NO
Sftpd	-3.29324	-2.78529	-3.14091	0.00566547	0.18215	-2.1372	NO
Reps2	-3.0481	-0.349262	-3.16791	0.00533997	0.180362	-2.14366	NO
Prss50	1.59424	-1.80256	3.17213	0.00529073	0.180007	-2.14949	NO
Cntfr	1.66424	2.88998	3.43069	0.00299215	0.146784	-2.15104	NO
Nr0b2	-1.77255	-5.13227	-3.11994	0.00593151	0.186112	-2.15321	NO
Ssbp1	0.334801	5.58542	3.60648	0.00202592	0.122601	-2.15699	NO
Osgepl1	-1.12204	1.51009	-3.30821	0.00392217	0.155615	-2.16597	NO
Ube4a	0.447631	6.37413	3.60772	0.00202038	0.122601	-2.16965	NO
Gm44511	1.89801	-2.92512	3.16349	0.00539198	0.180362	-2.17042	NO
Cyp3a41b	1.21047	-4.70458	3.10493	0.00612939	0.189285	-2.17176	NO
Gcgr	-2.80705	-3.44407	-3.11682	0.00597206	0.186434	-2.17657	NO
Chchd4	0.386209	4.56933	3.55357	0.00227854	0.127928	-2.17877	NO
Vmn1r47	-2.02726	-2.01362	-3.14316	0.0056376	0.18215	-2.18532	NO
Rrm1	-0.397381	7.60243	-3.6085	0.00201687	0.122601	-2.18621	NO
Gm10800	1.80081	-2.09001	3.16684	0.00535247	0.180362	-2.1871	NO
Lrmda	1.00461	0.484126	3.24813	0.00447725	0.163103	-2.18748	NO
Kbtbd3	0.595857	1.76477	3.33254	0.0037172	0.151625	-2.19309	NO
Nsd1	-0.377876	7.38365	-3.60786	0.00201975	0.122601	-2.20088	NO
Rbp4	1.93084	2.5883	3.4492	0.00287195	0.146091	-2.20268	NO
Lsm8	0.75415	6.08179	3.60095	0.00205097	0.122686	-2.20631	NO
Fos	-0.716942	5.39449	-3.57003	0.0021968	0.126682	-2.21004	NO
Rrbp1	-0.595266	7.73453	-3.6114	0.00200389	0.122601	-2.21022	NO
Ramp1	-1.68702	4.68423	-3.5001	0.00256557	0.138767	-2.21419	NO
Elovl4	1.34973	3.64719	3.4738	0.00271962	0.142404	-2.22007	NO
Glrb	-2.6435	1.00435	-3.22629	0.00469754	0.16674	-2.22082	NO
Rtn4ip1	0.618459	3.28229	3.40677	0.00315479	0.149044	-2.25794	NO
Rab3b	1.25051	0.696678	3.26922	0.00427417	0.163103	-2.26314	NO
Ccdc77	0.610588	4.77144	3.52855	0.00240867	0.132217	-2.26456	NO
Trrap	-0.524008	7.05149	-3.57962	0.0021505	0.125249	-2.26476	NO
Sync	-2.65133	-1.59761	-3.07431	0.00655321	0.193389	-2.2673	NO
Dcun1d4	0.523356	4.92575	3.50125	0.00255903	0.138767	-2.27069	NO
Unc13c	-1.62517	-1.9062	-3.10316	0.0061531	0.189285	-2.27676	NO
Fgf23	1.83382	-3.6371	3.08254	0.00643659	0.193389	-2.27962	NO
Chm	-0.550146	5.30252	-3.49218	0.00261105	0.139187	-2.28422	NO
Gcfc2	0.692224	3.40621	3.41429	0.00310274	0.148269	-2.28494	NO
Cfap300	0.788913	2.93819	3.37888	0.00335553	0.149691	-2.28612	NO
Slco1a4	-1.8063	-4.79984	-3.04741	0.00694912	0.197068	-2.29177	NO
Rhbdl1	0.658431	3.30811	3.38956	0.00327723	0.149044	-2.29194	NO
Kiss1r	-1.09081	0.0447632	-3.14285	0.00564147	0.18215	-2.30046	NO
Pea15a	-0.609783	7.52164	-3.56488	0.00222205	0.126682	-2.30495	NO
Tent5d	-1.92917	-4.77242	-3.03752	0.00710045	0.198016	-2.30952	NO
Hif3a	-1.08802	-1.52135	-3.10321	0.0061525	0.189285	-2.31458	NO
Btg4	1.46901	-5.24801	3.04275	0.00702004	0.197068	-2.31586	NO
Pir	1.50069	2.74966	3.35011	0.00357573	0.15023	-2.31685	NO
Acadvl	0.419882	6.65931	3.53589	0.00236974	0.130565	-2.32922	NO
Spata6	-0.792907	4.68566	-3.44839	0.00287715	0.146091	-2.32943	NO
Cpne4	-0.832756	-5.58815	-3.01929	0.00738776	0.201804	-2.33091	NO
Smg6	-0.595851	4.46198	-3.40281	0.00318258	0.149044	-2.33154	NO
Dsel	-0.888648	4.12059	-3.38782	0.00328987	0.149044	-2.33282	NO
Zbtb11	-0.382153	4.63926	-3.35802	0.00351386	0.149738	-2.34071	NO
Tpk1	1.17718	1.74543	3.27204	0.00424768	0.163103	-2.34122	NO
Zfp697	0.829491	1.55366	3.24999	0.00445898	0.163103	-2.34532	NO
Bpifc	0.664997	2.2836	3.26555	0.00430885	0.163103	-2.3505	NO
Rbm46	2.50777	-3.95988	3.05188	0.00688184	0.197068	-2.35445	NO
Mrpl42	0.306077	5.64546	3.50411	0.00254285	0.138553	-2.3574	NO
Speer4b	-1.19817	-5.28079	-3.00423	0.0076336	0.204569	-2.36014	NO
Ston1	-0.757597	3.51549	-3.33279	0.0037152	0.151625	-2.36133	NO
Dhodh	0.487671	3.74344	3.41605	0.00309068	0.148269	-2.36566	NO
Ddi1	-1.74896	-3.71736	-3.01807	0.00740741	0.201804	-2.36708	NO
Ubr5	-0.68015	5.72986	-3.48153	0.00267345	0.140484	-2.37365	NO
Bmp2	1.53035	4.54865	3.45231	0.00285226	0.146091	-2.37979	NO
Zfp846	0.556339	3.56815	3.36559	0.00345551	0.149738	-2.37979	NO
Slc22a17	-2.23364	0.781495	-3.10944	0.00606921	0.187878	-2.38026	NO
Mmp25	-1.45592	-0.888754	-3.03171	0.00719078	0.198758	-2.394	NO
L3mbtl3	-1.09469	1.89361	-3.2222	0.00474002	0.167845	-2.39407	NO
Per3	-0.493879	5.12065	-3.43416	0.00296924	0.146674	-2.40334	NO
Map4k5	-0.813207	4.31145	-3.41805	0.003077	0.148269	-2.40443	NO
Synj2	-0.79342	4.71137	-3.43842	0.00294132	0.146674	-2.4071	NO
Vps13a	-0.505288	4.83574	-3.35678	0.00352343	0.149738	-2.4128	NO
Gm20538	1.4789	-5.11154	2.97483	0.00813678	0.210048	-2.42203	NO
Ccdc188	-2.11367	-4.09926	-2.98174	0.00801576	0.20822	-2.42232	NO
Mpdz	-0.508548	6.01957	-3.49622	0.00258775	0.138831	-2.42914	NO
Pde1c	1.53003	3.71175	3.35978	0.00350016	0.149738	-2.42975	NO
Emc3	0.297491	6.64516	3.49506	0.0025944	0.138831	-2.43095	NO
Fezf2	-1.6981	0.829467	-3.14759	0.0055832	0.18215	-2.43537	NO
Pfkfb4	0.986129	3.43927	3.32965	0.00374098	0.151682	-2.43711	NO
Nxph4	1.75728	1.2511	3.2009	0.00496703	0.172572	-2.43724	NO
Krt76	-2.0362	-3.04534	-2.98504	0.00795844	0.20822	-2.43941	NO
Reg2	-0.821655	1.12043	-3.16272	0.0054011	0.180362	-2.43988	NO
Celf5	0.69093	0.206653	3.12821	0.0058252	0.184581	-2.43995	NO
Cox7a2	0.440775	6.72445	3.50876	0.00251675	0.137638	-2.44169	NO
Erich5	1.56532	-3.92814	3.00769	0.0075765	0.203779	-2.44307	NO
Cenpa	0.509146	5.98197	3.48562	0.00264929	0.140049	-2.44519	NO
Olfr372	-1.66957	-2.53296	-2.99603	0.00777092	0.206006	-2.4455	NO
Slc25a20	0.479402	4.68163	3.44935	0.00287099	0.146091	-2.44573	NO
Ube2e2	0.598004	3.55612	3.25346	0.00442509	0.163103	-2.44637	NO
Lrrc9	-0.832848	-5.5626	-2.94802	0.0086234	0.215173	-2.45766	NO
Atp7a	-1.30449	3.7883	-3.32323	0.00379434	0.152248	-2.4616	NO
Gm43518	-2.12376	-3.52699	-2.95671	0.00846276	0.213244	-2.46271	NO
Dop1b	-0.613063	4.6588	-3.39258	0.0032554	0.149044	-2.46339	NO
Ppp3r2	-0.849589	-5.5169	-2.94785	0.00862674	0.215173	-2.46342	NO
Cmc1	0.511443	4.34012	3.41477	0.00309943	0.148269	-2.46639	NO
Zfp729b	-0.385089	3.81515	-3.35128	0.00356653	0.15023	-2.46808	NO
St3gal4	0.74776	5.10562	3.40126	0.00319349	0.149044	-2.46867	NO
D6Ertd527e	1.76099	0.763226	3.15432	0.00550139	0.180563	-2.46887	NO
Piezo1	-0.430733	5.58835	-3.41872	0.00307244	0.148269	-2.47146	NO
Mup7	2.07612	-4.56649	2.95788	0.00844137	0.213069	-2.47283	NO
Irx4	2.69394	2.55738	3.29838	0.00400817	0.156988	-2.4789	NO
Zfpm1	-0.660829	5.47897	-3.44103	0.0029244	0.146674	-2.48256	NO
Ankrd34b	-0.935312	0.606455	-3.12617	0.00585124	0.185009	-2.4826	NO
Csf2	-3.33795	-3.43335	-2.96276	0.0083525	0.212572	-2.48326	NO
Adipoq	5.09974	-1.55753	3.06778	0.00664737	0.194366	-2.4854	NO
Nkx2-1	2.98601	-4.5762	2.95363	0.00851927	0.213575	-2.48583	NO
Ddx3y	-0.863829	-5.44872	-2.92957	0.00897467	0.219768	-2.49444	NO
Fancc	-0.422951	4.04929	-3.35854	0.0035098	0.149738	-2.49519	NO
Zfp385a	0.603323	5.28104	3.44618	0.00289125	0.146206	-2.49692	NO
Map1lc3a	0.431029	5.14131	3.3689	0.00343035	0.149738	-2.49853	NO
Nat8f6	-2.39236	-3.95371	-2.94497	0.00868067	0.216153	-2.49892	NO
Zcchc10	0.48135	3.8829	3.34726	0.00359831	0.150518	-2.50356	NO
Vstm4	-0.869104	0.239823	-3.04749	0.00694796	0.197068	-2.5062	NO
S100a4	-0.740646	5.41325	-3.38842	0.00328551	0.149044	-2.51615	NO
Pcdha9	-0.866562	-5.38043	-2.91597	0.00924245	0.225205	-2.51966	NO
Matk	-2.48761	-0.0714899	-3.03713	0.00710645	0.198016	-2.52099	NO
Slc9a1	-0.362532	6.73761	-3.39099	0.00326683	0.149044	-2.52572	NO
Ush2a	-0.86559	-5.45882	-2.91084	0.00934537	0.226099	-2.52873	NO
Grin2d	-0.909829	2.7732	-3.24095	0.00454855	0.163416	-2.52931	NO
Foxo1	0.36917	6.2463	3.44935	0.00287098	0.146091	-2.53008	NO
Olfr366	0.702166	0.0328416	3.07273	0.00657593	0.193427	-2.5325	NO
Gm21970	-0.865606	-5.44991	-2.90814	0.00939991	0.226596	-2.5337	NO
Stk11ip	-0.927579	4.22226	-3.33354	0.00370898	0.151625	-2.53513	NO
Ovol1	0.696789	5.36891	3.39825	0.00321485	0.149044	-2.53607	NO
Olfr263	-1.33612	-0.339468	-3.02732	0.0072599	0.199627	-2.53778	NO
P2rx2	0.71121	-0.959082	3.03707	0.00710743	0.198016	-2.54006	NO
Chil5	-0.859625	-5.3973	-2.90553	0.00945303	0.226596	-2.54129	NO
Ppp2r1b	0.4417	5.50774	3.3852	0.00330897	0.14942	-2.54176	NO
Gm21992	0.71442	1.71583	3.19139	0.00507183	0.175388	-2.54639	NO
Antxrl	-1.83352	-1.78823	-2.96474	0.00831665	0.212463	-2.54682	NO
B3galt6	-0.418134	4.44416	-3.33368	0.00370787	0.151625	-2.54712	NO
Clec4d	1.33773	0.938857	3.13136	0.0057851	0.184398	-2.55098	NO
Cutc	-0.637622	2.12945	-3.15698	0.00546944	0.180563	-2.56171	NO
Sgcb	0.596572	5.69691	3.43525	0.0029621	0.146674	-2.56246	NO
Prg2	0.824533	-5.2991	2.89613	0.00964682	0.229011	-2.5625	NO
Abcb7	-0.434472	6.1993	-3.37936	0.00335194	0.149691	-2.57109	NO
Ncapg	-0.451396	5.48947	-3.36891	0.00343027	0.149738	-2.57248	NO
Olfr545	2.45106	-3.84406	2.93853	0.00880242	0.217352	-2.57603	NO
Ubxn2a	-0.491631	5.01335	-3.37936	0.00335194	0.149691	-2.57741	NO
Uri1	-0.502076	4.30244	-3.33371	0.00370762	0.151625	-2.58007	NO
Cfap299	-0.854334	-5.49523	-2.8846	0.00988955	0.231425	-2.58076	NO
Zfp266	0.503996	6.6956	3.41861	0.00307322	0.148269	-2.58238	NO
Cpa4	1.4616	-1.61114	2.96483	0.00831513	0.212463	-2.58262	NO
Mr1	-1.15553	1.44336	-3.02262	0.00733446	0.200929	-2.58934	NO
Spic	-1.06272	-0.828726	-2.98965	0.00787926	0.207759	-2.59129	NO
Tmem170b	-0.500065	4.8877	-3.36937	0.00342682	0.149738	-2.59616	NO
Slco1b2	0.912674	-5.50643	2.86612	0.0102912	0.232193	-2.5965	NO
Aco1	-0.39831	6.51161	-3.40933	0.00313701	0.148942	-2.60681	NO
Ccdc175	-0.84858	-5.52354	-2.86502	0.0103155	0.232193	-2.60817	NO
Snap91	-0.849302	-5.48502	-2.86513	0.0103132	0.232193	-2.60857	NO
Uty	-0.829237	-5.553	-2.85895	0.0104512	0.234176	-2.61407	NO
Rubcn	-0.417967	5.8718	-3.37936	0.00335194	0.149691	-2.61955	NO
Olfr1344	-1.46495	-4.03139	-2.86791	0.0102515	0.232193	-2.62154	NO
P3h4	0.494102	5.49253	3.3072	0.00393096	0.155615	-2.62159	NO
Fcho2	-0.696658	4.75987	-3.34228	0.00363812	0.151533	-2.62859	NO
Cdkl1	-1.94812	-3.15866	-2.8834	0.00991517	0.231657	-2.62976	NO
Olfr190	-0.86854	-4.75197	-2.8541	0.0105608	0.235559	-2.63468	NO
Zfp988	-1.50451	-1.41843	-2.92991	0.00896812	0.219768	-2.65035	NO
Ets1	0.57845	7.39451	3.39905	0.00320916	0.149044	-2.65178	NO
Ociad2	0.824994	4.81193	3.36306	0.00347492	0.149738	-2.65595	NO
Kctd19	1.73303	-5.07377	2.86507	0.0103144	0.232193	-2.66303	NO
Msh3	-0.74468	4.1854	-3.275	0.00422011	0.163103	-2.66751	NO
Uba5	0.376286	5.89875	3.35377	0.00354698	0.150071	-2.67143	NO
Tra2a	0.856294	6.7721	3.40057	0.0031984	0.149044	-2.67842	NO
Tma16	0.51583	3.44426	3.25375	0.00442223	0.163103	-2.67864	NO
Smyd5	0.330385	5.58244	3.36908	0.00342897	0.149738	-2.68447	NO
Cyp2d9	-2.15737	-3.59877	-2.84023	0.0108803	0.239075	-2.68904	NO
Bet1	0.568735	4.94513	3.34045	0.00365283	0.151533	-2.69065	NO
Rpusd4	0.509054	4.5502	3.29244	0.00406097	0.158217	-2.6913	NO
Pcare	-1.17539	-3.18128	-2.84449	0.0107811	0.237847	-2.70198	NO
Arrdc3	-0.374542	6.61733	-3.35607	0.00352897	0.149738	-2.70237	NO
Hs3st3a1	1.52284	0.756763	2.99645	0.00776374	0.206006	-2.70724	NO
Riok1	-0.746438	4.74133	-3.30185	0.00397764	0.156872	-2.71783	NO
Wars2	-0.480021	4.22786	-3.23486	0.00460987	0.165102	-2.71807	NO
Btg1	0.369303	8.302	3.33911	0.00366364	0.151533	-2.72491	NO
Cyp2b10	1.73676	-4.69021	2.81487	0.0114888	0.24838	-2.72761	NO
Odf4	1.55503	-3.48564	2.85561	0.0105265	0.235179	-2.73723	NO
Atoh8	2.13723	0.639802	2.99373	0.00780976	0.206665	-2.74372	NO
Osbpl1a	-0.730945	4.95868	-3.26237	0.00433912	0.163103	-2.74438	NO
Slc27a6	-2.32123	0.634639	-2.95906	0.00841966	0.212885	-2.74909	NO
Eya4	1.77765	3.89799	3.23345	0.0046242	0.165102	-2.75146	NO
Arhgef11	-0.788143	4.81468	-3.26863	0.00427972	0.163103	-2.7644	NO
Pafah1b2	0.423883	7.38719	3.34941	0.00358126	0.15023	-2.76779	NO
Megf6	-1.2924	4.04915	-3.16053	0.00542711	0.180362	-2.76987	NO
Mboat2	-0.617644	4.73332	-3.26248	0.00433804	0.163103	-2.77132	NO
Olfr250	-0.894332	-0.660295	-2.91497	0.00926239	0.225319	-2.77727	NO
Agap1	-0.324861	6.53263	-3.27864	0.0041864	0.162248	-2.78082	NO
Gm11733	-1.46763	-4.88201	-2.77746	0.0124464	0.256681	-2.7873	NO
Uvssa	-0.520839	4.32797	-3.24622	0.00449612	0.163103	-2.78982	NO
Fads6	-0.738913	3.2957	-3.0785	0.00649364	0.193389	-2.79591	NO
Plekhh2	-0.79494	5.85101	-3.3178	0.00384009	0.152838	-2.7985	NO
Npffr2	2.34868	-4.51917	2.80187	0.0118133	0.251702	-2.80252	NO
Wdr54	0.647965	5.26474	3.2909	0.00407482	0.158339	-2.80768	NO
Uba7	-0.962527	-4.79839	-2.73902	0.0135099	0.262005	-2.8082	NO
Cyp3a16	2.70443	-0.369933	2.93651	0.00884099	0.21794	-2.8096	NO
Ces1d	6.01881	-2.5082	2.87035	0.010198	0.232193	-2.80968	NO
Coq6	-0.948529	3.52063	-3.14493	0.0056158	0.18215	-2.81118	NO
Ddx60	-0.896975	3.96104	-3.11124	0.00604537	0.187878	-2.81287	NO
Slc22a21	-0.724036	2.00928	-3.03264	0.00717624	0.198758	-2.81576	NO
Asb7	-0.946246	2.72466	-3.08185	0.00644632	0.193389	-2.81654	NO
Pln	-1.55567	-2.52702	-2.80418	0.0117549	0.251702	-2.82025	NO
Slc7a10	2.09242	-4.49269	2.78211	0.0123232	0.256231	-2.82167	NO
Acad11	0.649506	4.12306	3.23287	0.00463011	0.165102	-2.82199	NO
Cib2	0.469901	5.24615	3.24459	0.00451231	0.163103	-2.82922	NO
Gjd3	-1.80832	-4.89872	-2.75168	0.0131503	0.259589	-2.83023	NO
Bckdhb	0.606969	4.2752	3.24896	0.00446907	0.163103	-2.8307	NO
Lipt2	-1.21002	1.53364	-3.00959	0.00754523	0.203441	-2.83392	NO
Zmym3	-0.505333	5.86461	-3.25915	0.00436994	0.163103	-2.83447	NO
Npepl1	-0.420122	5.1037	-3.20407	0.00493262	0.171781	-2.83889	NO
Togaram1	-0.467216	4.49035	-3.21614	0.00480351	0.168878	-2.84082	NO
Pabpc1l	-0.837534	-1.36114	-2.84805	0.0106989	0.237208	-2.84095	NO
Ceacam3	-1.6562	-2.68358	-2.76662	0.0127379	0.258362	-2.84819	NO
Phlda3	0.517291	5.98957	3.30096	0.00398545	0.156872	-2.85288	NO
Idh1	-0.501261	5.57115	-3.2458	0.0045003	0.163103	-2.86125	NO
Fga	-1.22503	-5.10672	-2.72864	0.0138117	0.263404	-2.86128	NO
Pcdh9	-1.68499	-4.98201	-2.73508	0.0136238	0.263257	-2.86748	NO
Pagr1a	0.594005	3.67524	3.18043	0.00519535	0.177992	-2.86841	NO
Tmem252	1.23684	1.41823	2.99267	0.00782769	0.206769	-2.87064	NO
Mrm2	0.436734	3.40564	3.15525	0.00549029	0.180563	-2.87068	NO
Tigd3	0.422304	3.30806	3.12964	0.00580693	0.184398	-2.87109	NO
Agtr2	1.48871	-4.75143	2.74769	0.0132627	0.259731	-2.87474	NO
Krt13	1.51034	-4.54986	2.76089	0.0128945	0.258949	-2.87819	NO
Gm14325	-0.73706	1.96103	-2.99945	0.00771338	0.20596	-2.87984	NO
Kif26a	1.99682	4.46263	3.20425	0.00493072	0.171781	-2.88058	NO
Vmn2r114	-0.82866	-5.18001	-2.71068	0.0143492	0.267088	-2.88213	NO
Dmtn	1.0238	1.70702	3.00641	0.00759758	0.203974	-2.88606	NO
Dagla	-0.668594	3.93031	-3.14271	0.0056431	0.18215	-2.88728	NO
Gnl3l	-0.394082	6.38185	-3.24393	0.00451887	0.163103	-2.89333	NO
Rps27l	0.436163	6.03357	3.25477	0.00441229	0.163103	-2.89431	NO
Olfr1261	1.24668	-1.43531	2.81264	0.0115436	0.248845	-2.89438	NO
Lsm5	0.566948	4.71394	3.24293	0.0045288	0.163103	-2.89712	NO
Gfm2	-0.314913	4.08879	-3.15988	0.00543479	0.180362	-2.89882	NO
Vnn1	2.43634	-2.1	2.80382	0.0117639	0.251702	-2.90424	NO
Ttc30a2	-1.08159	-0.429951	-2.84287	0.0108187	0.238077	-2.90561	NO
Efcab5	-1.53642	-1.21688	-2.77869	0.0124137	0.256546	-2.91582	NO
Clec2d	0.816903	5.69703	3.26554	0.00430892	0.163103	-2.91924	NO
Jhy	-0.861898	-5.44039	-2.69361	0.0148787	0.271233	-2.92604	NO
Cib3	-0.877777	-5.21974	-2.6888	0.0150313	0.273676	-2.92638	NO
Trpc5os	-2.81279	-2.42803	-2.75512	0.0130544	0.259436	-2.93151	NO
Scgb1a1	-2.40053	-1.73688	-2.7792	0.0124002	0.256546	-2.93238	NO
Gm8773	2.34869	-1.59889	2.82175	0.0113205	0.24636	-2.93652	NO
Mcur1	-0.440732	5.46963	-3.24709	0.00448753	0.163103	-2.9384	NO
Sim2	-0.902394	-5.14563	-2.68377	0.0151923	0.274578	-2.94243	NO
Olfr1469	1.27763	-5.10974	2.70731	0.0144523	0.267088	-2.9446	NO
Zfp28	-0.432986	3.30079	-3.07474	0.00654712	0.193389	-2.94514	NO
Fkbp6	4.5946	-2.46288	2.80124	0.011829	0.251702	-2.9489	NO
Fam110a	0.372413	5.70509	3.24371	0.00452098	0.163103	-2.95247	NO
Zfp385c	-1.39289	-1.94805	-2.75916	0.0129422	0.258949	-2.95248	NO
Slc39a4	1.12661	2.94188	3.03334	0.00716537	0.198758	-2.95596	NO
Cacna2d4	-0.853208	-5.13591	-2.67202	0.015575	0.277754	-2.96492	NO
Pdcd5	0.313176	5.79846	3.19628	0.00501774	0.173925	-2.96507	NO
Rtl10	-0.749138	1.97926	-2.96751	0.00826696	0.211927	-2.96537	NO
Tpsg1	-0.851495	-5.37605	-2.6564	0.0160979	0.281066	-2.97251	NO
Tmem120b	0.489431	3.30145	3.10052	0.00618873	0.189985	-2.97575	NO
Tbx21	-1.18334	-2.07916	-2.73417	0.0136502	0.263257	-2.97836	NO
Snx33	0.41976	5.60284	3.21664	0.00479831	0.168878	-2.98085	NO
Sdr16c5	2.06713	2.75019	3.04285	0.00701843	0.197068	-2.98314	NO
Zfp248	0.711953	2.85594	3.00243	0.00766354	0.205	-2.99064	NO
Alkbh8	0.472447	4.53303	3.17308	0.00527983	0.180007	-2.9938	NO
Pon1	2.65945	-4.25866	2.72243	0.0139954	0.264604	-2.9953	NO
Anks6	-1.07946	1.36019	-2.87669	0.0100596	0.231731	-2.9963	NO
Gal3st3	1.17126	0.0441379	2.86936	0.0102197	0.232193	-2.99832	NO
Elac1	-0.674468	3.72951	-3.04664	0.0069608	0.197068	-3.0005	NO
Pi4ka	-0.366525	5.58393	-3.1655	0.00536826	0.180362	-3.00698	NO
Sycp2l	1.0962	-5.4167	2.62799	0.0170925	0.288443	-3.00767	NO
Cyb5rl	0.882001	3.32289	3.09417	0.00627519	0.192239	-3.01089	NO
Hoxa9	2.81047	-2.57783	2.73985	0.013486	0.262005	-3.01429	NO
Cdh3	1.79475	3.75631	3.1219	0.00590607	0.186112	-3.01545	NO
Grm4	-1.58103	-4.9863	-2.6466	0.0164345	0.282834	-3.02152	NO
Tead4	0.633478	5.02893	3.18762	0.00511402	0.176434	-3.0235	NO
Bola3	0.400678	4.38508	3.15421	0.00550274	0.180563	-3.03059	NO
Ttc39a	-0.484718	4.93242	-3.15898	0.00544553	0.180362	-3.03094	NO
Scrt2	1.96355	-4.95823	2.67714	0.0154069	0.275755	-3.03414	NO
Nkain2	-3.41235	-3.34535	-2.65155	0.0162638	0.281537	-3.03425	NO
Vmn2r83	-0.815484	-4.91034	-2.61618	0.0175225	0.289292	-3.0343	NO
Olfr417	-1.34206	-2.47455	-2.68638	0.0151085	0.274406	-3.03991	NO
Ctsw	1.08197	2.03071	2.93932	0.00878744	0.217352	-3.03997	NO
Svil	-0.549271	5.79167	-3.18623	0.00512965	0.17656	-3.04661	NO
St8sia4	-0.638582	1.75737	-2.8775	0.010042	0.231731	-3.04698	NO
Nhlh1	-2.0008	-4.39503	-2.64355	0.0165408	0.284332	-3.04967	NO
Dock9	-1.14158	4.89958	-3.13018	0.00580014	0.184398	-3.05013	NO
Yap1	0.460988	7.36933	3.20972	0.00487179	0.170871	-3.05409	NO
Cfap65	1.51325	-5.08002	2.65183	0.0162541	0.281537	-3.05684	NO
Fam219b	0.474918	5.04492	3.15879	0.00544776	0.180362	-3.05817	NO
Camkk1	0.823804	3.09335	3.04931	0.00692039	0.197068	-3.0602	NO
Kcne1	-0.82441	-5.46394	-2.61615	0.0175237	0.289292	-3.06039	NO
Zfp775	0.462317	2.57208	2.96795	0.00825906	0.211927	-3.07029	NO
Stx11	0.320864	4.08329	3.0615	0.00673893	0.195792	-3.0715	NO
Large1	-0.657886	6.7897	-3.18494	0.00514423	0.176651	-3.07262	NO
Grm5	-1.91838	-4.98903	-2.62175	0.0173183	0.289279	-3.07434	NO
Usp40	-0.665714	4.10859	-3.05608	0.00681914	0.196469	-3.0761	NO
Erp27	-1.62582	-2.80293	-2.62645	0.017148	0.288719	-3.07688	NO
Fam205a3	2.47204	-4.71558	2.63529	0.0168313	0.28698	-3.07732	NO
Acaa1b	0.641664	3.73489	3.08878	0.00634946	0.193389	-3.0841	NO
Lce1b	-0.761208	-5.48949	-2.59855	0.0181844	0.291496	-3.08467	NO
Fbxo25	0.419091	4.73845	3.1455	0.00560872	0.18215	-3.08615	NO
Ube2b	0.333107	7.42172	3.20521	0.00492023	0.171781	-3.08736	NO
Adgrf1	-2.32993	-2.82792	-2.65606	0.0161096	0.281066	-3.09413	NO
Zfp467	0.820433	4.09631	3.08609	0.00638689	0.193389	-3.09664	NO
Mblac2	-0.698894	2.64719	-2.95263	0.0085379	0.213679	-3.09713	NO
Olfr640	1.38087	-2.22875	2.7124	0.014297	0.26689	-3.09717	NO
Zfp317	0.480771	5.66135	3.16656	0.0053558	0.180362	-3.09722	NO
Gm12248	-1.44856	-1.99674	-2.67047	0.0156262	0.278331	-3.10274	NO
Rgs19	0.32364	4.47789	3.0765	0.00652207	0.193389	-3.1031	NO
Immp2l	1.45196	-0.927689	2.75832	0.0129656	0.259066	-3.10423	NO
Gm9	-0.758372	-5.47227	-2.58602	0.0186687	0.294614	-3.10583	NO
Tfr2	0.995239	0.307783	2.78474	0.0122541	0.255211	-3.11667	NO
Adamts15	-0.819479	4.92815	-3.083	0.0064302	0.193389	-3.12051	NO
Pcdh1	-0.473032	7.19692	-3.11241	0.00603001	0.187846	-3.12229	NO
Fgg	-1.54234	-1.42505	-2.68485	0.0151576	0.274578	-3.12413	NO
Fbxl7	-0.991929	-0.0456409	-2.72969	0.013781	0.263404	-3.13259	NO
P2ry2	-1.14866	2.32441	-2.88775	0.0098227	0.230591	-3.13268	NO
Cyp4f14	1.48688	-5.25432	2.60469	0.0179513	0.290009	-3.13713	NO
Gbp11	-1.38695	-4.35785	-2.583	0.0187874	0.294614	-3.13908	NO
Znhit2	-0.485796	4.24788	-3.06858	0.00663576	0.194366	-3.14111	NO
Gm10277	-0.983701	-0.132245	-2.72819	0.0138249	0.263404	-3.14189	NO
Myadml2	-0.84462	-4.70901	-2.57819	0.0189779	0.294614	-3.14377	NO
Slurp1	1.30983	0.637273	2.79795	0.0119126	0.253096	-3.14397	NO
Fcer2a	3.30046	1.32883	2.9014	0.00953774	0.227331	-3.1444	NO
Npc1	-0.594683	4.43071	-3.07482	0.00654596	0.193389	-3.14539	NO
Cdcp2	1.93572	-2.89563	2.61421	0.0175955	0.289292	-3.15602	NO
Gm14403	-2.849	-2.5565	-2.60128	0.0180803	0.290875	-3.15942	NO
Ankrd16	-0.731369	0.703725	-2.78826	0.0121622	0.254704	-3.16077	NO
Adgrf3	-1.4423	-5.0159	-2.57759	0.0190017	0.294614	-3.16213	NO
Lrpprc	-0.369366	5.97229	-3.07598	0.0065294	0.193389	-3.16381	NO
Rgs3	-0.574936	5.55065	-3.14614	0.00560096	0.18215	-3.16589	NO
Dlk2	1.06368	0.0304965	2.74175	0.0134316	0.261675	-3.17043	NO
Eya1	2.28091	0.276827	2.78156	0.0123378	0.256231	-3.17047	NO
Scmh1	-0.521938	5.02998	-3.11031	0.00605772	0.187878	-3.17286	NO
Cdkn1c	0.600814	3.46914	3.04403	0.0070005	0.197068	-3.17601	NO
Gcc2	-0.649254	3.18683	-2.93921	0.00878956	0.217352	-3.18011	NO
Pde8b	-0.824459	1.06806	-2.76695	0.012729	0.258362	-3.18221	NO
Tuba3b	-3.28227	-4.04328	-2.57397	0.0191464	0.294614	-3.18324	NO
Fcgr4	0.862877	1.78498	2.86944	0.010218	0.232193	-3.18345	NO
Sar1a	0.23293	7.17846	3.16056	0.00542676	0.180362	-3.18412	NO
Gm28635	-0.739666	-5.54292	-2.53235	0.0208861	0.302757	-3.18494	NO
Aadac	-0.739412	-5.53169	-2.53187	0.0209073	0.302757	-3.18602	NO
Ceacam20	-0.84838	-1.22406	-2.66711	0.0157376	0.279641	-3.18722	NO
Ino80c	-0.482746	5.48765	-3.08739	0.00636881	0.193389	-3.18859	NO
Vps13b	-0.360956	5.71672	-3.05466	0.00684016	0.196502	-3.18944	NO
Klhdc7b	1.24276	-3.71691	2.60278	0.0180233	0.290828	-3.19764	NO
Mmp1b	-0.762124	-5.41192	-2.5287	0.0210457	0.302757	-3.1978	NO
Fcrl5	-0.961745	-2.60839	-2.61586	0.0175345	0.289292	-3.20093	NO
Mctp1	-1.11472	0.0703728	-2.70625	0.014485	0.267164	-3.20131	NO
Sms	-0.424556	5.55407	-3.06882	0.00663223	0.194366	-3.2031	NO
Ndst4	2.64903	-3.31052	2.58349	0.0187682	0.294614	-3.20404	NO
Morc1	-0.758867	-5.49073	-2.5248	0.0212174	0.302757	-3.2046	NO
Gatm	0.514395	5.1836	3.07373	0.00656154	0.193389	-3.20535	NO
Dhx29	-0.3422	4.83741	-3.08045	0.00646598	0.193389	-3.20598	NO
Tia1	0.34921	6.42542	3.11949	0.00593737	0.186112	-3.20821	NO
Olfr721-ps1	-0.861272	-5.29264	-2.53434	0.0207996	0.302757	-3.20914	NO
Fmo3	-0.904564	-5.233	-2.52687	0.0211263	0.302757	-3.21427	NO
Kng2	1.78093	-1.69588	2.68164	0.015261	0.274598	-3.21457	NO
Fbxo27	-1.07192	-0.435729	-2.66394	0.0158434	0.280509	-3.21795	NO
Btnl4	-0.758723	-5.41542	-2.5178	0.0215288	0.302757	-3.21848	NO
Ggt7	1.38449	1.57609	2.85555	0.0105278	0.235179	-3.22288	NO
Lpcat1	-0.836317	5.28042	-3.07973	0.00647629	0.193389	-3.22419	NO
Pck1	4.21178	-1.94735	2.66784	0.0157131	0.279542	-3.22464	NO
Gm21119	-0.81321	-5.35281	-2.519	0.0214753	0.302757	-3.225	NO
Slco1c1	-0.700837	-5.49262	-2.51042	0.0218623	0.304386	-3.22577	NO
Supt5	-0.53787	6.85342	-3.13641	0.00572153	0.183263	-3.22822	NO
Ndufa9	0.298051	6.01213	3.11858	0.00594913	0.186112	-3.22902	NO
Gbf1	-0.962076	3.53341	-2.92355	0.00909224	0.221936	-3.22939	NO
Gm12166	-0.699038	-5.65513	-2.50788	0.0219778	0.304516	-3.23727	NO
Coq8a	1.24286	3.51056	2.98161	0.00801801	0.20822	-3.23926	NO
Errfi1	-0.749052	6.93599	-3.13016	0.00580033	0.184398	-3.24026	NO
Rnf40	0.312488	6.92214	3.06289	0.00671852	0.195792	-3.24452	NO
Azgp1	-0.758703	-5.26273	-2.49927	0.0223744	0.306366	-3.25096	NO
Epha6	-0.702961	-5.61096	-2.50332	0.0221872	0.305612	-3.25317	NO
Lmod1	-1.13817	1.99725	-2.78789	0.0121718	0.254704	-3.25352	NO
Olfr948	-0.885688	-5.13161	-2.51233	0.0217754	0.304004	-3.25514	NO
Unc5d	-1.07061	-1.19001	-2.6238	0.017244	0.289017	-3.25533	NO
BC016579	1.37166	2.28743	2.86841	0.0102406	0.232193	-3.2565	NO
Amelx	-1.39786	-4.95901	-2.51927	0.021463	0.302757	-3.2637	NO
Dek	-0.621657	7.83712	-3.12121	0.00591506	0.186112	-3.26377	NO
Nmur1	-1.82781	-4.57181	-2.53267	0.0208724	0.302757	-3.26397	NO
Olfr824	-1.27471	-3.17408	-2.56454	0.0195281	0.296952	-3.27086	NO
Adam8	0.936903	4.5661	3.06081	0.00674917	0.195792	-3.27196	NO
Mroh8	-2.2516	-2.77426	-2.54533	0.0203281	0.302093	-3.27278	NO
Gm47959	0.919615	-5.22708	2.50009	0.0223364	0.306366	-3.27627	NO
Ofd1	-0.484455	5.44121	-3.08478	0.00640527	0.193389	-3.2783	NO
Lef1	-1.96897	1.22635	-2.75559	0.0130413	0.259436	-3.27954	NO
Rtraf	0.307354	6.24658	3.08743	0.00636824	0.193389	-3.28047	NO
Lce1a1	-0.758706	-5.04645	-2.48288	0.0231487	0.311306	-3.28153	NO
Pink1	-0.594511	5.96973	-3.06168	0.00673636	0.195792	-3.28482	NO
Ceacam19	1.1601	0.460361	2.72639	0.0138781	0.263738	-3.28997	NO
Nrn1l	0.769493	0.0114631	2.69687	0.0147763	0.270367	-3.29018	NO
Cacng8	-1.23598	-4.56346	-2.50968	0.0218956	0.304411	-3.29207	NO
Cstdc4	2.33752	-4.09407	2.52232	0.0213272	0.302757	-3.29209	NO
Mkrn2os	-0.70248	-5.62697	-2.47842	0.0233637	0.311924	-3.29241	NO
Ankk1	2.5842	0.620855	2.72952	0.013786	0.263404	-3.29298	NO
Slc25a18	1.36849	-0.474642	2.66227	0.0158994	0.280687	-3.29459	NO
Olfr101	1.86038	-3.88127	2.53793	0.0206445	0.302448	-3.29481	NO
Atp6v1g3	-1.63081	-4.02037	-2.52049	0.0214088	0.302757	-3.30155	NO
Bcl2a1d	-0.986936	-0.057218	-2.66194	0.0159105	0.280687	-3.30318	NO
Nox1	-1.09405	-1.03858	-2.62471	0.0172107	0.289017	-3.30398	NO
Gm43552	-0.702829	-5.43445	-2.46925	0.0238111	0.315545	-3.30468	NO
Tox3	-1.92714	-2.88867	-2.5496	0.0201478	0.302033	-3.30695	NO
Zmynd15	0.688142	3.30335	2.93557	0.00885905	0.218021	-3.30797	NO
Prpf38b	0.498065	5.62731	3.08746	0.00636791	0.193389	-3.31073	NO
Apol7b	-0.828577	-4.60505	-2.46786	0.02388	0.315678	-3.31325	NO
Gm10135	2.36794	-4.09369	2.55217	0.0200399	0.301334	-3.3218	NO
Nat8f1	0.561207	0.4646	2.70904	0.0143993	0.267088	-3.32237	NO
Zbtb40	0.336981	5.07263	2.98723	0.00792079	0.208111	-3.3224	NO
Zg16	1.56438	-4.05598	2.53382	0.0208223	0.302757	-3.32626	NO
Tub	-1.04175	-1.17822	-2.60923	0.0177806	0.289292	-3.32644	NO
Rlim	-0.275333	7.83018	-3.07515	0.00654129	0.193389	-3.32816	NO
Chchd6	0.408883	4.35782	3.01853	0.00739996	0.201804	-3.32852	NO
Kel	0.926327	-4.95866	2.42402	0.0261402	0.324857	-3.33108	NO
Rrad	0.578922	1.88217	2.76304	0.0128356	0.258922	-3.33841	NO
Arid2	-0.447192	6.387	-3.04955	0.00691682	0.197068	-3.33927	NO
Trim30c	-1.40273	-2.80305	-2.51612	0.0216046	0.303533	-3.34144	NO
Bpifb2	-0.694533	-5.47425	-2.43796	0.0254008	0.321446	-3.34268	NO
Slc35d3	-1.45791	-2.16355	-2.53788	0.0206466	0.302448	-3.34562	NO
Prss16	-0.71016	3.99547	-2.96084	0.00838739	0.212572	-3.34688	NO
Pnrc2	0.255309	7.19462	3.03333	0.00716543	0.198758	-3.34908	NO
Prb1	-0.765594	-4.78317	-2.44828	0.0248656	0.320641	-3.34916	NO
Adra1a	2.07664	-1.81051	2.60544	0.0179229	0.290009	-3.34948	NO
Hcar1	3.14998	-3.53152	2.54144	0.020494	0.302287	-3.3511	NO
Negr1	2.96253	-3.58328	2.55519	0.0199137	0.30046	-3.35215	NO
Slc46a2	3.13323	0.713274	2.75058	0.0131814	0.259589	-3.35495	NO
Gm21762	2.11533	-4.33058	2.50275	0.0222134	0.305688	-3.36289	NO
Nyap2	1.6725	-3.82941	2.51792	0.0215237	0.302757	-3.36343	NO
Slc25a54	-0.700985	-5.45006	-2.43377	0.0256209	0.322659	-3.3671	NO
Ubd	-2.22848	-0.813736	-2.56684	0.0194345	0.29668	-3.3683	NO
Trip11	-0.439214	5.72949	-3.0447	0.00699032	0.197068	-3.36885	NO
Ptch2	-0.677737	-5.24896	-2.42784	0.0259359	0.324826	-3.37008	NO
Tmprss3	-1.58175	-4.66524	-2.45544	0.024501	0.31819	-3.37029	NO
Cdh9	0.872638	-5.09348	2.45993	0.0242747	0.317223	-3.37377	NO
Cdkl3	-0.669228	1.02906	-2.68533	0.0151421	0.274578	-3.37425	NO
Slc4a4	0.928495	4.96407	2.99769	0.0077429	0.206003	-3.3748	NO
Hyls1	0.48766	4.3674	2.988	0.00790759	0.208111	-3.37527	NO
Slbp	0.283611	8.15452	3.05663	0.00681097	0.196469	-3.37665	NO
Ddx50	0.243549	5.82724	3.05904	0.00677516	0.196161	-3.378	NO
Elovl2	-1.07938	-2.08707	-2.47868	0.0233509	0.311924	-3.37861	NO
Tial1	0.352195	6.03256	3.05563	0.00682574	0.196469	-3.38073	NO
Foxs1	-0.843439	0.544504	-2.61423	0.0175949	0.289292	-3.3815	NO
Gsdma2	-0.783425	-2.26698	-2.52772	0.0210889	0.302757	-3.3832	NO
Dsg3	1.0537	7.78061	3.03997	0.00706271	0.19789	-3.38348	NO
Gm20503	-0.699518	-5.43145	-2.42379	0.0261529	0.324857	-3.38443	NO
Umad1	0.47844	4.02233	2.96155	0.00837441	0.212572	-3.38702	NO
Pole4	0.407057	5.90328	3.02558	0.00728734	0.200009	-3.38905	NO
Ranbp3l	-0.902259	-3.00474	-2.48292	0.0231464	0.311306	-3.39327	NO
Creld1	0.444777	4.68339	2.98069	0.00803397	0.20822	-3.39337	NO
Slc16a2	-0.639192	6.26077	-3.01447	0.00746558	0.203014	-3.39387	NO
Rsrc1	0.299329	5.99463	3.04325	0.0070124	0.197068	-3.39671	NO
Prss27	2.14287	0.540347	2.70482	0.0145288	0.267164	-3.39844	NO
Palb2	-0.508119	3.39769	-2.86846	0.0102395	0.232193	-3.40022	NO
Tnfrsf18	-0.746543	4.72642	-2.97007	0.00822113	0.211855	-3.40065	NO
Ndufa13	0.352201	6.96723	3.04715	0.00695302	0.197068	-3.40742	NO
Rad51ap2	1.64188	-4.16279	2.46516	0.0240137	0.316878	-3.40866	NO
Dmkn	1.29282	6.63615	3.0096	0.00754511	0.203441	-3.41618	NO
Olfr801	-1.26363	-2.30884	-2.49871	0.0224006	0.306366	-3.42213	NO
Brca2	-0.638802	4.99084	-2.98399	0.00797659	0.20822	-3.42423	NO
Letmd1	0.560673	3.79635	2.91033	0.00935572	0.226099	-3.43047	NO
T	1.6157	-4.60967	2.45501	0.0245226	0.318191	-3.43067	NO
Tead1	-0.789223	6.91069	-3.02981	0.00722066	0.198918	-3.4359	NO
Chac1	-0.716456	2.46469	-2.76466	0.0127912	0.258922	-3.44038	NO
Ddx10	0.40326	5.46603	3.00929	0.00755014	0.203441	-3.44062	NO
Akr1cl	-0.687694	-5.53141	-2.38433	0.0283589	0.333286	-3.44105	NO
Mospd1	-0.372408	4.17358	-2.90104	0.00954524	0.227331	-3.44171	NO
Cdc25a	0.444624	5.59346	3.01318	0.00748662	0.203212	-3.44387	NO
Pspn	0.863472	-0.38343	2.6201	0.0173786	0.289292	-3.44535	NO
Adi1	-0.329694	5.44675	-2.90251	0.00951482	0.227331	-3.44569	NO
Gm7694	-1.06034	4.46207	-2.9068	0.00942727	0.226596	-3.44774	NO
En2	1.80317	-2.36125	2.55311	0.0200003	0.301045	-3.45028	NO
Ddc	-0.69835	-5.51312	-2.38616	0.0282525	0.333286	-3.45243	NO
Btbd10	-0.384859	4.7199	-2.96053	0.00839289	0.212572	-3.45373	NO
Lsm3	0.594188	6.44865	3.03104	0.00720137	0.198758	-3.46046	NO
Scn3a	-1.6183	-2.63461	-2.46846	0.0238502	0.315566	-3.46197	NO
Dok6	-0.792164	-3.2313	-2.38293	0.0284397	0.333286	-3.4631	NO
Cyct	-1.39951	-5.01119	-2.38371	0.0283948	0.333286	-3.4653	NO
Cables1	0.763599	3.52437	2.86273	0.0103664	0.232839	-3.46553	NO
Epor	1.01164	1.07126	2.68697	0.0150894	0.274396	-3.46829	NO
C1d	0.446479	5.39839	2.99822	0.00773392	0.206003	-3.47159	NO
Hspa8	0.345245	10.1916	3.01012	0.00753656	0.203441	-3.47361	NO
Olfr131	-2.12782	-4.60001	-2.3957	0.0277058	0.332065	-3.47761	NO
Gm5751	-1.16491	-3.18623	-2.42486	0.0260952	0.324857	-3.48051	NO
Speg	1.45585	2.74264	2.80228	0.0118028	0.251702	-3.4854	NO
Sh2d6	-2.43956	-4.42513	-2.38509	0.0283145	0.333286	-3.48921	NO
Fan1	-0.736516	1.4338	-2.66497	0.015809	0.280235	-3.49387	NO
Sema5a	-0.997135	3.19247	-2.76027	0.0129116	0.258949	-3.49537	NO
Slc9a3r2	-0.574189	6.23275	-2.98298	0.00799421	0.20822	-3.49701	NO
Gata6	2.38359	2.43429	2.79208	0.0120634	0.254469	-3.49762	NO
Chad	1.01009	1.63077	2.71865	0.0141083	0.265671	-3.50002	NO
Trpv3	-0.606991	4.13592	-2.87231	0.0101549	0.232193	-3.50469	NO
Tmem218	0.402423	3.20248	2.80452	0.0117464	0.251702	-3.50649	NO
Slc16a13	0.80535	1.39724	2.66248	0.0158922	0.280687	-3.50757	NO
Lig4	0.490904	3.87309	2.84411	0.0107898	0.237847	-3.51318	NO
Olfr1346	0.737262	-1.58392	2.50579	0.0220734	0.305184	-3.51789	NO
Wfdc17	0.90378	2.62869	2.76398	0.0128099	0.258922	-3.51805	NO
Gm8922	-1.31883	-5.05237	-2.36164	0.0297047	0.33714	-3.51905	NO
Tlcd2	0.959109	0.420346	2.61257	0.0176561	0.289292	-3.51907	NO
Snx10	0.512228	4.15019	2.90129	0.00954004	0.227331	-3.52156	NO
Pstpip2	-0.488452	3.64339	-2.82141	0.0113286	0.24636	-3.52347	NO
Pomk	0.472434	5.16574	2.9552	0.00849045	0.213575	-3.52468	NO
S100a2	1.57601	-5.10767	2.36444	0.0295354	0.336454	-3.52559	NO
Tmod3	0.245698	7.48407	2.98543	0.00795174	0.20822	-3.53365	NO
Ubqln2	-0.370828	6.29356	-2.94004	0.00877366	0.217352	-3.53471	NO
Tmem100	1.91	2.24131	2.73301	0.013684	0.263404	-3.53488	NO
Abcg4	1.04768	-0.248199	2.54095	0.0205147	0.302287	-3.53508	NO
Xpr1	-0.491524	5.40377	-2.9235	0.00909326	0.221936	-3.53871	NO
Id3	0.855471	6.12939	2.95389	0.00851449	0.213575	-3.53876	NO
Nrn1	1.92011	-0.644067	2.57149	0.019246	0.295106	-3.53908	NO
Paqr7	-0.420313	4.0154	-2.84401	0.0107922	0.237847	-3.54356	NO
Klhl14	-0.807319	-5.07969	-2.32168	0.0322206	0.345026	-3.54443	NO
Tab3	-0.32605	5.75583	-2.96064	0.00839102	0.212572	-3.54621	NO
Gabarap	0.337441	8.08887	2.98047	0.00803774	0.20822	-3.54751	NO
Adam21	-0.721058	-2.27254	-2.38336	0.0284147	0.333286	-3.54984	NO
Crip3	-2.16605	-4.3138	-2.36504	0.0294989	0.336454	-3.55067	NO
Olfr251	-1.76726	-3.22753	-2.37758	0.028753	0.334025	-3.55247	NO
Msx2	2.49633	-1.71353	2.51185	0.0217973	0.304004	-3.55647	NO
Fer1l6	-1.46741	-4.77225	-2.35598	0.0300492	0.338413	-3.55676	NO
Mxi1	0.325201	6.70261	2.96884	0.00824306	0.211927	-3.55718	NO
Snrnp27	0.476215	5.95567	2.97815	0.00807833	0.208905	-3.55895	NO
Prss43	-2.07391	-4.38921	-2.35432	0.0301514	0.338413	-3.55995	NO
Ppfia2	-1.64702	-4.92886	-2.33111	0.0316095	0.343099	-3.5674	NO
Olfr982	-1.21375	-4.01728	-2.33558	0.0313238	0.343099	-3.56777	NO
Psg29	-2.37832	-3.53605	-2.36665	0.0294025	0.336035	-3.56793	NO
Uprt	-0.593572	1.91074	-2.57541	0.0190886	0.294614	-3.56933	NO
Rbl2	-0.378504	5.28963	-2.87035	0.0101979	0.232193	-3.57074	NO
Olfr167	2.24991	-4.80927	2.35756	0.0299527	0.338394	-3.57099	NO
Pirb	-0.485571	1.60958	-2.52448	0.0212317	0.302757	-3.57353	NO
Nkain4	-0.75955	-5.33727	-2.30744	0.0331639	0.350034	-3.58031	NO
Plce1	-0.771621	5.10489	-2.88051	0.00997727	0.231731	-3.58047	NO
Mpl	-1.87615	-3.24652	-2.36879	0.0292742	0.336003	-3.58139	NO
Cwc22	-0.480127	4.11267	-2.82753	0.011181	0.244228	-3.58625	NO
Serpinb10	-0.696256	-5.44066	-2.30836	0.0331024	0.349636	-3.58706	NO
Clec12b	0.940928	-5.31819	2.28726	0.034545	0.35497	-3.58799	NO
Atp8b1	-0.52467	5.72314	-2.93957	0.00878265	0.217352	-3.59177	NO
Kazald1	0.910151	2.26316	2.66051	0.0159585	0.281066	-3.59367	NO
Astn1	-1.11262	-3.81428	-2.35925	0.0298494	0.338013	-3.59704	NO
Arntl2	1.02101	3.99374	2.83617	0.0109755	0.240452	-3.59823	NO
Nip7	0.286058	5.65186	2.93052	0.00895624	0.219768	-3.59847	NO
Nsun5	0.434899	4.65235	2.90617	0.00944008	0.226596	-3.59853	NO
Rxfp4	1.40577	-4.4529	2.34048	0.0310132	0.342556	-3.60042	NO
Ttc41	0.492446	0.858168	2.58921	0.0185444	0.294436	-3.60141	NO
Cfap45	1.28653	1.14712	2.62463	0.0172138	0.289017	-3.60359	NO
Trub1	-0.482717	2.8313	-2.71617	0.0141829	0.265768	-3.60426	NO
Asap2	-0.507904	4.83712	-2.88854	0.00980602	0.230566	-3.60636	NO
Olfr1202	-1.14837	-2.16277	-2.37916	0.0286599	0.334011	-3.60819	NO
Cend1	1.29024	-2.31695	2.46048	0.0242472	0.317223	-3.60931	NO
Icos	-0.877853	-1.61343	-2.41876	0.026425	0.32634	-3.60958	NO
C1qtnf3	0.860957	2.88002	2.7491	0.0132229	0.259589	-3.61561	NO
Ovca2	0.391585	4.30647	2.87689	0.0100552	0.231731	-3.61596	NO
Wdr72	2.23423	-2.21844	2.43032	0.0258038	0.323446	-3.61716	NO
Aldh1a7	2.97167	-4.00105	2.37493	0.028909	0.334538	-3.6193	NO
Ccdc51	0.554641	3.26792	2.79296	0.0120406	0.25435	-3.61977	NO
Ccnjl	1.09738	1.46827	2.62799	0.0170924	0.288443	-3.62228	NO
Rasef	-0.866675	3.39092	-2.70574	0.0145007	0.267164	-3.62358	NO
Cavin2	-0.604506	4.33218	-2.82043	0.0113525	0.246517	-3.62391	NO
Birc6	-0.877501	5.73647	-2.89691	0.00963048	0.228991	-3.62517	NO
Klk1b5	-0.68564	-5.29469	-2.27468	0.0354325	0.357201	-3.62667	NO
Olfr1256	-0.970672	-3.29261	-2.27878	0.0351411	0.356592	-3.62835	NO
Fasl	1.06942	-3.10414	2.39111	0.0279679	0.333252	-3.62858	NO
Add2	-1.17444	0.491378	-2.5308	0.0209538	0.302757	-3.62975	NO
Zbed3	-0.620937	5.54207	-2.88947	0.0097863	0.23047	-3.62988	NO
St6galnac1	-2.1975	-3.43938	-2.33395	0.0314274	0.343099	-3.63122	NO
Minar2	-1.48539	-4.94572	-2.30054	0.0336302	0.351439	-3.63169	NO
Msl2	0.353511	7.03257	2.89341	0.00970352	0.229619	-3.63288	NO
Cers3	1.04464	2.10763	2.64142	0.0166151	0.285278	-3.63321	NO
Adh6b	-1.39879	-3.48608	-2.35494	0.0301132	0.338413	-3.6336	NO
Crot	0.555523	5.56238	2.89483	0.00967395	0.229287	-3.63405	NO
Mplkip	-0.391337	4.61628	-2.87905	0.0100085	0.231731	-3.63415	NO
Serpinb11	-2.62176	-4.63724	-2.30559	0.0332885	0.350486	-3.63423	NO
Ccdc159	0.920298	0.974424	2.60795	0.0178285	0.289292	-3.63574	NO
Vmn1r19	-1.6447	-3.79054	-2.31419	0.0327136	0.347768	-3.63593	NO
Prima1	-0.695711	-5.2896	-2.27856	0.0351561	0.356592	-3.63727	NO
Ces5a	-1.63145	-4.53598	-2.30693	0.0331979	0.350133	-3.63909	NO
Fgf12	-2.05611	-2.21783	-2.38964	0.0280522	0.333252	-3.63921	NO
Pou5f1	-1.08809	-1.63308	-2.40807	0.0270116	0.329358	-3.63959	NO
Stard6	-1.05751	0.469251	-2.52117	0.0213786	0.302757	-3.64379	NO
Vsig4	2.44735	-3.10357	2.40285	0.0273023	0.330176	-3.64385	NO
Cenpc1	-0.273127	5.31516	-2.86559	0.010303	0.232193	-3.64779	NO
Zfp454	1.01949	-0.10701	2.49369	0.0226353	0.307928	-3.64914	NO
Slc23a4	1.15946	0.613314	2.549	0.020173	0.302093	-3.64997	NO
Tesmin	-1.34695	-0.719189	-2.44786	0.0248872	0.320641	-3.65059	NO
Rassf8	-1.26964	5.4474	-2.8492	0.0106725	0.236978	-3.65618	NO
Gm29797	0.863425	-1.85502	2.35589	0.0300549	0.338413	-3.65873	NO
Six2	-0.829292	-1.15942	-2.41041	0.026882	0.328321	-3.66058	NO
Ccdc177	-1.81291	-0.254043	-2.47239	0.023657	0.314155	-3.66231	NO
Tshz1	-0.838926	6.2447	-2.9117	0.00932793	0.226099	-3.66293	NO
Bace2	-0.745365	2.10443	-2.59847	0.0181872	0.291496	-3.66388	NO
Chit1	1.55128	3.3985	2.79491	0.0119905	0.254019	-3.66468	NO
Usp7	-0.509815	6.34737	-2.91363	0.00928914	0.225598	-3.66627	NO
Tgm5	0.921666	2.16351	2.64932	0.0163403	0.282023	-3.67404	NO
Mettl21c	-1.41409	-4.28025	-2.27643	0.0353077	0.357201	-3.67465	NO
Gm9008	0.495127	4.55034	2.85092	0.0106332	0.236461	-3.67527	NO
Kcna3	-1.77049	-3.41422	-2.28691	0.0345691	0.35497	-3.6792	NO
Faxc	-0.889288	-1.34485	-2.34225	0.0309014	0.342303	-3.68077	NO
Gm14412	-1.76158	-4.01044	-2.28723	0.0345468	0.35497	-3.68179	NO
Farsa	-0.383039	5.21986	-2.82228	0.0113077	0.24636	-3.68268	NO
Rspo3	-2.30685	-0.360157	-2.44285	0.025146	0.321446	-3.6836	NO
Olfr125	1.08243	-4.36143	2.30659	0.0332207	0.350133	-3.68424	NO
Panx1	0.433546	2.7907	2.70814	0.0144269	0.267088	-3.68721	NO
Map1lc3b	0.361891	7.49154	2.90637	0.009436	0.226596	-3.6883	NO
Bbs4	0.369289	3.83883	2.78937	0.0121336	0.254704	-3.68831	NO
Gm49353	-0.756819	-5.12842	-2.24577	0.0375527	0.366794	-3.68998	NO
Cptp	0.321308	5.14905	2.85214	0.0106053	0.236195	-3.69014	NO
Boll	-0.897938	-3.54227	-2.21612	0.0398484	0.374743	-3.69021	NO
Atp2b2	-2.3205	-3.85916	-2.27336	0.0355268	0.357593	-3.69461	NO
Col28a1	-2.48867	-0.749881	-2.3819	0.0285	0.333589	-3.69483	NO
Olfr613	0.472236	1.18646	2.58172	0.0188379	0.294614	-3.69572	NO
Gm5862	0.959739	-5.24331	2.20645	0.0406246	0.375924	-3.69648	NO
Ccdc113	2.53658	-4.26779	2.32935	0.0317226	0.343099	-3.6969	NO
Cnot10	0.338222	5.81403	2.89089	0.00975636	0.230132	-3.69698	NO
Otud5	-0.42921	7.54039	-2.88197	0.0099458	0.231731	-3.69883	NO
Rln1	1.84392	-4.55663	2.28207	0.0349088	0.356094	-3.69997	NO
Gm28308	-0.766067	-5.36717	-2.23661	0.0382484	0.368851	-3.70085	NO
Mmp7	-0.759718	-5.39657	-2.23534	0.0383465	0.368876	-3.70204	NO
Zdhhc17	0.453072	3.72723	2.76917	0.0126686	0.258362	-3.70216	NO
Eef1akmt4	0.411928	3.05371	2.69511	0.0148314	0.270764	-3.70478	NO
Olfr1181	-0.848188	-4.30776	-2.22655	0.0390264	0.37347	-3.70701	NO
Flrt1	-1.13227	-0.805613	-2.39015	0.0280224	0.333252	-3.70816	NO
Slc25a21	0.632277	-4.75704	2.26498	0.0361311	0.359995	-3.70954	NO
Fastkd3	-0.785342	2.60898	-2.56717	0.0194208	0.29668	-3.71274	NO
Nsd3	-0.513929	6.91962	-2.88072	0.00997276	0.231731	-3.71792	NO
Cd300ld	0.597285	1.48229	2.56648	0.0194492	0.29668	-3.72349	NO
Gm6583	-1.13071	-3.64288	-2.23655	0.0382533	0.368851	-3.72497	NO
Ccdc38	0.704608	0.664128	2.53171	0.0209143	0.302757	-3.72502	NO
Cpt1b	0.933955	3.33199	2.73101	0.0137422	0.263404	-3.72514	NO
Tacr2	-1.03564	-1.81071	-2.32904	0.0317423	0.343099	-3.72681	NO
Fras1	1.0575	0.204738	2.50337	0.0221849	0.305612	-3.72733	NO
Colec10	-2.19419	-3.93506	-2.25581	0.0368035	0.364971	-3.7299	NO
Scube3	1.45729	3.61477	2.72348	0.0139643	0.264355	-3.72998	NO
Ugt1a5	-0.764627	-4.88404	-2.21876	0.0396391	0.374413	-3.73159	NO
Tesk2	-0.457296	3.36957	-2.67478	0.0154842	0.276468	-3.73247	NO
Slc8a3	0.915969	-1.70848	2.35417	0.0301606	0.338413	-3.7331	NO
Spata31d1b	-0.737893	-5.45018	-2.20494	0.0407474	0.375924	-3.7346	NO
Lsm6	0.38459	6.32088	2.87781	0.0100354	0.231731	-3.73664	NO
Tln1	-0.358234	8.72694	-2.89216	0.00972984	0.229873	-3.73695	NO
Alpl	-1.45102	4.22027	-2.74898	0.0132263	0.259589	-3.73929	NO
Pim2	-0.293113	4.24952	-2.77436	0.012529	0.257664	-3.74113	NO
Fam151b	-0.799214	0.769939	-2.49871	0.0224007	0.306366	-3.74143	NO
Aldh5a1	-0.803479	3.98712	-2.75969	0.0129276	0.258949	-3.74297	NO
Nol3	1.01963	1.37231	2.56096	0.019675	0.29797	-3.74298	NO
Insl3	0.907921	2.78524	2.6976	0.0147534	0.270283	-3.74306	NO
Trim26	-0.630278	4.62603	-2.77448	0.0125259	0.257664	-3.74357	NO
Npffr1	-0.523541	0.214336	-2.45751	0.0243963	0.317839	-3.74368	NO
Ido2	-0.990531	-5.28809	-2.21469	0.0399627	0.374899	-3.74861	NO
Vamp8	0.464196	6.29636	2.86232	0.0103757	0.232839	-3.74861	NO
Hmgcl	-0.382941	4.21149	-2.71993	0.01407	0.265671	-3.74886	NO
Tmem40	0.926251	3.54379	2.72953	0.0137856	0.263404	-3.7498	NO
Mfsd4b1	1.69823	-4.30582	2.24336	0.0377349	0.367058	-3.75329	NO
Ap3b1	-0.357146	6.28026	-2.88604	0.00985899	0.231076	-3.75363	NO
Gkn3	-0.990052	-5.19014	-2.21107	0.040252	0.375363	-3.75446	NO
Tmem47	-1.69207	4.10008	-2.70871	0.0144095	0.267088	-3.75628	NO
Prkce	-0.538052	4.30641	-2.77306	0.012564	0.258025	-3.75727	NO
Olfr1322	-0.597829	0.185682	-2.43923	0.0253344	0.321446	-3.75815	NO
Lyplal1	0.761608	2.30121	2.62414	0.0172315	0.289017	-3.75853	NO
Klhdc8b	0.480899	3.75528	2.73116	0.0137379	0.263404	-3.76179	NO
Olfr1259	0.879632	-5.1451	2.22526	0.0391275	0.373711	-3.76541	NO
Ikzf3	-1.50604	-1.21124	-2.35043	0.0303914	0.339455	-3.7668	NO
Zfp661	0.643341	2.11598	2.61512	0.0175617	0.289292	-3.7689	NO
Scgb2a2	-1.79522	-5.04319	-2.21892	0.0396264	0.374413	-3.76942	NO
Pmaip1	1.33993	3.88252	2.76703	0.0127266	0.258362	-3.77114	NO
Spin1	-0.468981	7.01384	-2.87872	0.0100158	0.231731	-3.77285	NO
Trim67	0.807014	-0.359627	2.43339	0.025641	0.322659	-3.77461	NO
Cisd3	0.444744	3.97161	2.75729	0.012994	0.259282	-3.77529	NO
Mtx1	0.273385	4.45583	2.7396	0.0134932	0.262005	-3.77769	NO
Calb2	-1.72479	-4.99538	-2.21308	0.0400912	0.375279	-3.78019	NO
Polr2k	0.301347	3.9312	2.72552	0.0139038	0.263886	-3.78285	NO
Olfr776	-1.53251	-5.36729	-2.20189	0.0409955	0.377159	-3.78606	NO
Ptpn12	-0.334476	6.73431	-2.86563	0.0103021	0.232193	-3.78795	NO
Ddx47	0.34527	6.39783	2.8674	0.0102629	0.232193	-3.78921	NO
Rgs7bp	-1.01194	-1.71422	-2.31152	0.0328908	0.348229	-3.79491	NO
Mpo	0.838105	-1.14814	2.34638	0.0306426	0.340714	-3.79632	NO
Olfr487	-0.933285	-2.67211	-2.28157	0.0349436	0.356094	-3.79695	NO
Cep192	-0.887341	4.56834	-2.74524	0.0133322	0.260746	-3.79749	NO
Bcl6b	1.01217	3.57114	2.75033	0.0131882	0.259589	-3.80074	NO
Crocc	-0.706955	4.54632	-2.76888	0.0126766	0.258362	-3.8058	NO
Mboat7	-0.537711	4.26385	-2.74171	0.0134329	0.261675	-3.80667	NO
Plxna3	-0.82949	5.55314	-2.811	0.0115845	0.249353	-3.8067	NO
Tas2r135	-1.33646	-5.03945	-2.18933	0.0420329	0.380331	-3.81049	NO
Flg2	0.794812	-5.4248	2.11345	0.0488304	0.398946	-3.81133	NO
Casq2	1.87779	0.996036	2.52009	0.0214265	0.302757	-3.81182	NO
Mto1	0.36831	3.9156	2.74857	0.0132379	0.259589	-3.81195	NO
Krt90	2.38842	-0.609398	2.40939	0.0269383	0.328736	-3.81205	NO
Mak	2.36648	0.0830468	2.43274	0.0256755	0.322659	-3.81357	NO
Cdh6	-0.738276	-1.25701	-2.31936	0.0323725	0.346134	-3.81365	NO
Orai1	-0.375329	5.15328	-2.76797	0.0127013	0.258362	-3.81431	NO
Kif5c	1.17908	4.9242	2.78976	0.0121233	0.254704	-3.81546	NO
Bpi	-0.757764	-5.37125	-2.14804	0.0456163	0.391623	-3.81948	NO
Olfr1388	-0.866328	4.0723	-2.65293	0.0162164	0.281377	-3.82005	NO
Gip	-1.43457	-4.73425	-2.1922	0.0417939	0.380331	-3.8226	NO
Pdpn	-0.855041	3.69532	-2.63838	0.0167219	0.286339	-3.82378	NO
Syt11	0.61133	4.8132	2.75078	0.0131757	0.259589	-3.82557	NO
Immp1l	0.321517	4.7388	2.80346	0.011773	0.251702	-3.82622	NO
Mup13	-0.687601	-5.56463	-2.13774	0.0465527	0.394322	-3.8263	NO
Sdhaf3	0.4335	2.54482	2.59484	0.0183266	0.292045	-3.8268	NO
Hcn1	-3.20163	-3.71377	-2.19475	0.0415828	0.379958	-3.82691	NO
Sh2d1b2	-1.91563	-1.93079	-2.29807	0.0337987	0.352203	-3.82872	NO
Olr1	-1.35781	-1.45308	-2.30015	0.0336564	0.351464	-3.82963	NO
Dsg1a	2.39468	3.23792	2.66649	0.0157583	0.279672	-3.82974	NO
Dlst	-0.426691	5.94851	-2.83024	0.0111161	0.243172	-3.82981	NO
Lmx1b	-1.02865	5.3623	-2.81263	0.011544	0.248845	-3.83184	NO
Ube2f	-0.648997	6.08584	-2.83761	0.0109417	0.240068	-3.83215	NO
Slitrk1	-1.57522	-4.56741	-2.1863	0.0422871	0.381365	-3.83693	NO
Gcnt7	-1.65682	-3.71757	-2.20722	0.0405624	0.375924	-3.84096	NO
Catsper2	-1.15399	-0.174332	-2.37688	0.0287941	0.334025	-3.84113	NO
Cox5a	0.34625	6.29916	2.74172	0.0134323	0.261675	-3.84248	NO
Tdrd9	-0.840368	-2.55078	-2.23035	0.0387313	0.371127	-3.84328	NO
Vmn1r91	0.962313	-5.27899	2.15818	0.0447118	0.38967	-3.84409	NO
Mrpl24	0.330021	6.8084	2.84492	0.0107711	0.237847	-3.84583	NO
Adamts3	-0.942323	1.0062	-2.3965	0.0276603	0.331788	-3.84634	NO
Tmem71	0.939397	1.18935	2.48155	0.0232126	0.311597	-3.84676	NO
Gm49496	-0.769735	-5.09045	-2.14617	0.0457846	0.391623	-3.84847	NO
Sdhd	0.290622	6.74857	2.78699	0.0121953	0.254704	-3.84893	NO
Epb41l3	1.21726	2.46145	2.62719	0.0171211	0.288596	-3.85472	NO
Gm38392	0.703737	-0.921174	2.26603	0.0360552	0.3599	-3.85982	NO
Ythdc2	-0.734191	2.68293	-2.56886	0.0193522	0.296119	-3.8599	NO
Amer1	-0.565247	5.35524	-2.77836	0.0124225	0.256546	-3.8605	NO
C5ar1	0.57238	3.90188	2.6842	0.0151783	0.274578	-3.86223	NO
Nox3	1.17338	-5.04238	2.15985	0.0445642	0.38967	-3.86318	NO
Atp6v1b1	-0.800702	5.49347	-2.78727	0.0121881	0.254704	-3.86409	NO
Ephx2	2.98512	-0.00917059	2.439	0.0253462	0.321446	-3.86802	NO
Cckbr	-1.47164	-5.22655	-2.1503	0.0454133	0.391623	-3.86806	NO
Jade3	-0.322556	4.97865	-2.75184	0.0131459	0.259589	-3.87201	NO
Tnfrsf11a	-0.855778	3.69545	-2.65568	0.0161224	0.281066	-3.87358	NO
Csnk1g1	0.393968	6.14681	2.81577	0.0114667	0.24838	-3.8742	NO
Mup5	-0.769757	-4.89504	-2.12885	0.0473748	0.39544	-3.87515	NO
Spata7	-0.69934	2.74847	-2.58111	0.0188621	0.294614	-3.87756	NO
Shisal2a	-1.21304	-5.24497	-2.14484	0.0459055	0.391623	-3.87861	NO
Kcng1	-2.08475	-4.59265	-2.16364	0.044231	0.388859	-3.87975	NO
Ccdc34	-0.554786	5.39582	-2.79523	0.0119822	0.254019	-3.8816	NO
Serinc2	-0.456591	8.20077	-2.75611	0.0130267	0.259436	-3.88229	NO
Kcnh4	-1.00471	-2.23844	-2.24866	0.0373354	0.366794	-3.88238	NO
Cdh18	0.883936	-5.35697	2.12004	0.048203	0.397412	-3.88239	NO
Cox8b	5.14702	-1.3973	2.33585	0.0313065	0.343099	-3.88418	NO
Pdrg1	0.385849	4.73473	2.77908	0.0124034	0.256546	-3.88553	NO
Ppp1cb	0.470227	8.96137	2.81539	0.0114759	0.24838	-3.88602	NO
Acrbp	0.798122	4.5141	2.76351	0.0128227	0.258922	-3.88636	NO
Usp8	-0.412346	5.51302	-2.76882	0.0126782	0.258362	-3.88817	NO
Gm10801	1.77297	-4.42884	2.19963	0.041181	0.378047	-3.88848	NO
Gm17545	-1.88857	-4.74453	-2.14678	0.0457298	0.391623	-3.88921	NO
Smad6	0.799117	4.91515	2.76918	0.0126683	0.258362	-3.89096	NO
Pou3f2	-0.942697	-2.72469	-2.18459	0.042431	0.38158	-3.89202	NO
Pak1ip1	-0.482778	5.62028	-2.78489	0.0122503	0.255211	-3.89319	NO
Gm49380	1.73478	-2.71323	2.2489	0.0373175	0.366794	-3.8936	NO
Ppm1n	-2.25509	-4.66139	-2.15132	0.0453214	0.391354	-3.89425	NO
Ccp110	-0.568641	5.13694	-2.73394	0.0136567	0.263257	-3.89429	NO
Ndufa4l2	1.66047	3.17228	2.65387	0.0161841	0.28136	-3.89469	NO
Wdr41	-0.374247	4.92765	-2.76197	0.0128648	0.258949	-3.89511	NO
Csl	0.663482	-3.33785	2.22692	0.0389981	0.373441	-3.90148	NO
Selenoo	-0.306598	4.49845	-2.71754	0.0141418	0.265671	-3.90421	NO
Phactr3	1.9219	-4.69109	2.15736	0.0447842	0.38967	-3.90814	NO
Dio1	-0.858759	-4.72078	-2.12034	0.0481742	0.397396	-3.90822	NO
Anapc13	0.358708	4.94718	2.75131	0.0131609	0.259589	-3.90881	NO
Tasor2	-0.629106	5.31307	-2.76849	0.0126871	0.258362	-3.91205	NO
Klhl23	-0.515255	3.89921	-2.65803	0.0160426	0.281066	-3.91339	NO
Arhgef38	-0.951455	1.81769	-2.37712	0.02878	0.334025	-3.9137	NO
Vmn1r78	0.877376	-2.58257	2.2089	0.0404266	0.375616	-3.91805	NO
Mpp2	0.45583	3.70564	2.65351	0.0161964	0.28136	-3.91965	NO
Sstr2	-0.944786	-1.75797	-2.24748	0.0374241	0.366794	-3.91976	NO
Spag8	0.555768	0.289431	2.3669	0.029387	0.336035	-3.92417	NO
Dzip1	1.25891	4.24944	2.65907	0.0160072	0.281066	-3.92598	NO
Lgalsl	0.539303	6.04164	2.79418	0.0120091	0.25405	-3.92682	NO
Slc9a6	-0.396978	3.99672	-2.57483	0.0191118	0.294614	-3.92862	NO
Eml4	-0.488914	5.26227	-2.69501	0.0148346	0.270764	-3.93002	NO
Lman2l	-0.874954	4.38923	-2.68196	0.0152505	0.274598	-3.93036	NO
Nme4	0.973348	1.73039	2.52342	0.0212785	0.302757	-3.9305	NO
Zfp105	1.47458	1.45174	2.46355	0.0240935	0.317147	-3.93301	NO
Vegfd	0.745765	0.447503	2.38094	0.0285559	0.333589	-3.93478	NO
Sptb	-0.622645	6.34696	-2.78773	0.0121761	0.254704	-3.93593	NO
Olfr1428	0.863331	-4.84322	2.12934	0.0473293	0.39544	-3.93664	NO
Il3ra	0.684345	3.6933	2.59962	0.0181435	0.291496	-3.93984	NO
Gng5	0.332115	7.54686	2.80121	0.0118299	0.251702	-3.94087	NO
Aqp12	-1.39919	-5.25447	-2.11073	0.0490915	0.398946	-3.94166	NO
Jakmip1	-1.73513	-3.19396	-2.15577	0.0449249	0.389974	-3.94169	NO
Chrnd	-1.49444	-4.11355	-2.13219	0.0470642	0.395083	-3.9417	NO
Slc4a10	0.877286	-5.32579	2.07713	0.0524255	0.407214	-3.94387	NO
Cep57	0.25696	6.26478	2.76132	0.0128827	0.258949	-3.94421	NO
Gm2042	2.50152	-1.32627	2.31615	0.0325838	0.347409	-3.94533	NO
Pkhd1l1	1.78193	0.468269	2.39707	0.0276283	0.331749	-3.94881	NO
Zfp648	-0.749281	-5.33143	-2.09063	0.0510627	0.402902	-3.95282	NO
Clec11a	0.989029	2.44817	2.51457	0.0216742	0.303958	-3.95331	NO
Olfr820	0.870734	-5.35697	2.07085	0.053071	0.408259	-3.95699	NO
Arhgap26	-0.746913	4.09536	-2.62231	0.017298	0.289279	-3.95768	NO
Agk	0.327126	4.48515	2.70161	0.0146284	0.268326	-3.9601	NO
Pipox	-1.49517	-1.39511	-2.2042	0.0408074	0.376131	-3.96096	NO
G0s2	1.73726	1.52762	2.50068	0.0223091	0.306366	-3.961	NO
Stk36	-0.970023	1.25455	-2.39076	0.0279875	0.333252	-3.96131	NO
Wnt7a	-1.32458	-1.29721	-2.15451	0.0450374	0.390087	-3.96552	NO
Fbxo43	-0.758795	-1.60637	-2.23855	0.0381001	0.368851	-3.96579	NO
Ncoa1	-0.63071	5.23176	-2.73864	0.0135208	0.262005	-3.96635	NO
Chd5	1.01253	-1.63651	2.27372	0.0355008	0.357575	-3.96897	NO
Zfp938	0.638064	1.30083	2.43809	0.025394	0.321446	-3.97133	NO
Cenpi	-0.575044	5.17696	-2.70524	0.0145161	0.267164	-3.97264	NO
Olfr381	-0.717927	-1.35642	-2.24461	0.0376401	0.366794	-3.97353	NO
Zfp653	0.482003	4.11166	2.65639	0.0160984	0.281066	-3.97528	NO
Nradd	0.587378	5.03965	2.73545	0.0136132	0.263257	-3.97627	NO
Mrpl35	0.306027	4.85887	2.72678	0.0138665	0.263738	-3.97663	NO
Ccdc81	-2.10144	-4.25049	-2.1239	0.047838	0.396172	-3.97664	NO
Spdye4c	-1.56605	-5.09348	-2.08778	0.0513474	0.40351	-3.97689	NO
Wnt2b	-0.577202	0.827137	-2.33581	0.0313092	0.343099	-3.97763	NO
Serpinb12	1.06918	-1.448	2.26844	0.0358803	0.359679	-3.97884	NO
Kcnq4	-0.84275	3.70756	-2.57837	0.0189707	0.294614	-3.98255	NO
Sncg	1.2909	3.58836	2.62057	0.0173614	0.289292	-3.98323	NO
Hipk4	-0.554213	2.14749	-2.45854	0.0243447	0.317837	-3.98328	NO
Isy1	0.337558	5.34657	2.71756	0.0141409	0.265671	-3.98648	NO
Ccdc174	0.386052	4.77546	2.71635	0.0141776	0.265768	-3.98857	NO
Oit1	-3.15092	-3.20935	-2.1058	0.0495685	0.399524	-3.99266	NO
Mup16	1.55929	-5.13046	2.09621	0.0505081	0.401861	-3.99461	NO
Bdnf	-0.856977	2.08517	-2.46893	0.0238272	0.315545	-3.99658	NO
Rasl2-9	1.02325	-3.11854	2.18524	0.0423761	0.38158	-3.99695	NO
Slc7a14	-0.627373	-0.369921	-2.29072	0.0343045	0.353976	-3.99774	NO
Bloc1s4	0.380183	4.17453	2.6565	0.0160945	0.281066	-3.9985	NO
C1rb	0.824994	-0.143726	2.32408	0.0320637	0.344933	-4.00028	NO
Brinp3	2.10134	2.65326	2.46684	0.0239304	0.316061	-4.00086	NO
Olfr1402	-0.583299	0.148378	-2.29484	0.0340198	0.353035	-4.00223	NO
Frmd4a	-0.851788	5.61965	-2.72882	0.0138066	0.263404	-4.00273	NO
Ntf3	1.27726	-3.27285	2.09547	0.0505809	0.401861	-4.00302	NO
Fam205a4	1.78819	-4.9892	2.09376	0.0507507	0.402031	-4.0033	NO
Rpusd3	0.439096	2.55744	2.5118	0.0217995	0.304004	-4.00477	NO
Fgf2	-0.435776	3.48098	-2.56137	0.0196579	0.29797	-4.00614	NO
Mmrn1	-2.03474	-3.77678	-2.07823	0.0523131	0.406864	-4.01103	NO
Pdcl2	1.4871	-3.95719	2.15732	0.0447877	0.38967	-4.01271	NO
Gtpbp4	-0.34277	3.58663	-2.58441	0.0187319	0.294614	-4.01444	NO
Rspo1	1.94214	1.35908	2.45192	0.0246798	0.31883	-4.01459	NO
Fcrl1	-1.25017	-1.92341	-2.17524	0.0432258	0.386293	-4.01631	NO
Olfr313	1.23082	-3.31417	2.15756	0.0447663	0.38967	-4.01729	NO
Lect2	1.16245	-5.21506	2.04981	0.0552874	0.4133	-4.01861	NO
Ltb4r1	1.25709	0.445475	2.3591	0.0298585	0.338013	-4.01913	NO
Elavl1	0.257669	7.44284	2.75387	0.0130891	0.259589	-4.02031	NO
Kif5a	0.396642	3.13869	2.50475	0.0221213	0.30556	-4.02085	NO
Fhl4	0.955003	-1.48625	2.2207	0.0394859	0.374413	-4.0222	NO
Olfr1110	-0.662265	-5.36729	-2.029	0.0575596	0.420062	-4.02263	NO
Hdhd5	0.331783	4.49273	2.59615	0.0182761	0.292045	-4.02417	NO
Myo19	-0.693033	3.84448	-2.59357	0.0183752	0.292066	-4.02588	NO
Ap4e1	-0.473669	3.88461	-2.57378	0.0191541	0.294614	-4.02616	NO
Gpd1	2.33202	3.70084	2.63409	0.0168739	0.28705	-4.02622	NO
Myh3	-2.37309	-3.83514	-2.07562	0.0525809	0.407257	-4.02786	NO
Itk	-1.06361	-1.44948	-2.15896	0.0446425	0.38967	-4.02859	NO
Dmrtc1a	-2.00563	-4.62528	-2.06892	0.0532712	0.408825	-4.02976	NO
Edn2	-0.941386	2.1342	-2.4565	0.0244474	0.318053	-4.03054	NO
Rnf17	-2.08018	-4.92847	-2.05711	0.0545094	0.411706	-4.03086	NO
Ly6g5c	0.885801	-5.27118	2.03145	0.0572885	0.420062	-4.03139	NO
Ucn2	0.543488	2.72752	2.52502	0.0212078	0.302757	-4.03155	NO
Cyp2c55	1.47192	-3.87854	2.11519	0.0486642	0.398946	-4.03244	NO
Marco	-2.4937	-4.04131	-2.06602	0.0535725	0.409732	-4.03948	NO
Olfr104-ps	0.816087	-2.75042	2.10613	0.0495362	0.399524	-4.04279	NO
Dppa2	-1.34058	-1.7679	-2.19102	0.0418921	0.380331	-4.04482	NO
Zfp280c	-0.572256	5.0239	-2.68212	0.0152453	0.274598	-4.04599	NO
Ttc32	-0.554956	1.90791	-2.41959	0.0263795	0.326231	-4.0487	NO
Phospho1	1.28778	2.35559	2.4839	0.0230998	0.311215	-4.04987	NO
Tm4sf5	-0.995698	-3.32903	-2.11783	0.0484119	0.398284	-4.0529	NO
Rhno1	0.405257	6.59674	2.71426	0.0142405	0.266508	-4.05341	NO
Ch25h	0.698052	1.90981	2.42339	0.0261745	0.324857	-4.05406	NO
Lce3c	-1.34309	-5.19014	-2.03099	0.0573389	0.420062	-4.05414	NO
Cyp4f16	-0.383368	4.81644	-2.67754	0.0153938	0.275755	-4.05436	NO
Tet2	-1.02434	4.16137	-2.56355	0.0195685	0.296967	-4.05489	NO
Kcnip2	-0.591391	0.142186	-2.26938	0.0358127	0.359246	-4.05616	NO
Zfp575	0.896509	0.817366	2.38102	0.0285512	0.333589	-4.05834	NO
Gbp4	-2.34035	-3.15682	-2.07669	0.0524711	0.407257	-4.05921	NO
Ss18l2	0.280759	3.72697	2.54051	0.0205337	0.302287	-4.05938	NO
Gm21994	1.69926	-4.50994	2.12139	0.0480744	0.397396	-4.05967	NO
Spink6	-0.668051	-5.36552	-1.99911	0.0609725	0.428166	-4.06016	NO
Anks4b	0.908476	-2.67889	2.16131	0.044435	0.38967	-4.06264	NO
Kcnma1	-1.47692	0.589166	-2.26545	0.0360972	0.3599	-4.06288	NO
Fmr1	-0.338533	7.49788	-2.72413	0.013945	0.264328	-4.06393	NO
Vmn1r210	-1.83382	-3.73534	-2.05469	0.0547654	0.411968	-4.06452	NO
Lrig1	-0.284518	7.39131	-2.71754	0.0141415	0.265671	-4.07073	NO
Igsf11	-1.02563	-1.35675	-2.16947	0.0437231	0.386885	-4.07181	NO
Sap25	0.86202	4.07472	2.62934	0.0170438	0.288443	-4.07226	NO
Erv3	-1.89536	-4.50211	-2.04076	0.0562651	0.416238	-4.07238	NO
Sox7	-0.566231	1.20447	-2.33467	0.0313813	0.343099	-4.07362	NO
Pdcd6	-0.26295	6.52049	-2.70773	0.0144395	0.267088	-4.07398	NO
Lyve1	0.964681	-0.0737084	2.26613	0.0360475	0.3599	-4.07485	NO
Ggt1	2.04242	1.60619	2.44035	0.025276	0.321446	-4.0753	NO
Tmem88	-0.755757	1.17091	-2.346	0.0306663	0.340721	-4.07717	NO
Glyatl3	-1.27654	-2.67509	-2.0915	0.0509757	0.402733	-4.07759	NO
Glrp1	1.11715	-0.759373	2.24516	0.0375991	0.366794	-4.07899	NO
Gm47969	-1.40599	-3.41316	-2.03404	0.0570018	0.419426	-4.07941	NO
Phf8	-0.637534	4.60512	-2.58428	0.0187372	0.294614	-4.08055	NO
Fam186b	-1.44465	-2.24887	-2.12566	0.0476727	0.396172	-4.0836	NO
Serpina1c	-1.91007	-4.25824	-2.05548	0.0546813	0.411741	-4.08416	NO
Pik3c2b	-0.824983	4.74724	-2.64801	0.0163858	0.282326	-4.08489	NO
Slamf7	-1.1205	-1.00179	-2.18869	0.0420869	0.380331	-4.08733	NO
Adtrp	1.62908	-1.85803	2.15538	0.0449596	0.389974	-4.08772	NO
Atp8a1	-0.669762	5.21126	-2.6748	0.0154837	0.276468	-4.08772	NO
Glra4	-2.04393	-3.54711	-2.04239	0.056088	0.415552	-4.08797	NO
Cabp1	-2.23091	-3.16338	-2.06956	0.0532046	0.408825	-4.08802	NO
Col4a6	-0.816299	5.9628	-2.61815	0.01745	0.289292	-4.0891	NO
Pnpla3	1.18832	-0.908174	2.2357	0.0383189	0.368851	-4.08919	NO
Zfp683	1.40342	-4.06911	2.06288	0.0539008	0.410469	-4.09031	NO
Nr1i3	0.81885	-1.8637	2.12826	0.0474299	0.39544	-4.09132	NO
Gm49395	1.98332	-4.54255	2.04815	0.0554655	0.41405	-4.09401	NO
Spink2	1.73676	-2.54203	2.15519	0.0449767	0.389974	-4.096	NO
Dpys	1.0511	-2.19268	2.13974	0.046369	0.394032	-4.09855	NO
Pcdh12	-0.945763	0.625917	-2.28339	0.0348155	0.356015	-4.1052	NO
H2-Oa	-1.08165	-0.787814	-2.17716	0.043062	0.385419	-4.10591	NO
Olfr1295	-1.01438	-2.68865	-2.06191	0.0540031	0.410824	-4.1068	NO
Man1b1	0.257885	6.09997	2.71337	0.0142674	0.266673	-4.107	NO
Dner	0.617798	-4.31454	2.00522	0.0602611	0.426855	-4.10782	NO
Zranb2	-0.268295	6.51518	-2.70749	0.0144467	0.267088	-4.10784	NO
Zmynd10	0.915318	-0.723653	2.22053	0.0394992	0.374413	-4.11171	NO
Hoxb1	-0.821653	-1.37073	-2.15703	0.0448129	0.38967	-4.1142	NO
Cks1b	0.252598	6.96184	2.7104	0.0143577	0.267088	-4.11614	NO
Fcrl6	1.19268	-4.98423	2.00233	0.0605967	0.426855	-4.1182	NO
Arih1	0.431366	7.25018	2.70232	0.0146061	0.268251	-4.11953	NO
Vmn2r73	-0.530636	0.352959	-2.24698	0.0374617	0.366794	-4.11999	NO
Tmem198b	0.415098	3.58164	2.57218	0.0192185	0.294989	-4.12025	NO
Fbxo17	-1.19323	2.67796	-2.42093	0.026307	0.325871	-4.12035	NO
Olfr1404	-1.55011	-4.75334	-2.01972	0.0586007	0.422715	-4.1225	NO
Pde4a	0.632601	5.22622	2.61684	0.0174985	0.289292	-4.12311	NO
Olfr544	0.721426	-2.05267	2.10522	0.0496247	0.399541	-4.12506	NO
Olfr1183	-0.712707	-0.529185	-2.17339	0.0433848	0.38632	-4.12611	NO
Onecut3	-0.595783	-1.06367	-2.16958	0.0437136	0.386885	-4.1265	NO
Olfr1381	-0.961731	-1.5804	-2.12633	0.0476106	0.396172	-4.12831	NO
Armc2	0.923993	1.23197	2.34082	0.0309916	0.342556	-4.13148	NO
Cd96	-1.42597	-1.80334	-2.10755	0.0493986	0.399313	-4.13172	NO
Hcn2	0.651468	2.6509	2.4313	0.0257517	0.323066	-4.13212	NO
Gm49354	-0.584342	-5.58965	-1.95165	0.066765	0.443507	-4.1341	NO
Dclk2	-0.960343	1.96199	-2.37039	0.0291784	0.336003	-4.13561	NO
Nt5c3	0.471183	4.94477	2.65625	0.0161029	0.281066	-4.13563	NO
Olfr67	-1.35055	-4.76462	-1.99905	0.0609802	0.428166	-4.1378	NO
Spata25	1.49575	-4.98389	2.00562	0.0602146	0.426855	-4.13993	NO
Llcfc1	1.42134	-2.11141	2.11086	0.0490787	0.398946	-4.14103	NO
Sftpa1	-0.584282	-5.58168	-1.94602	0.0674847	0.444857	-4.14299	NO
Gm29094	1.26674	-4.04696	1.99012	0.0620337	0.430851	-4.14303	NO
Dnah3	-1.36979	-4.66768	-1.99705	0.0612145	0.429382	-4.14384	NO
Vinac1	-0.746398	-2.09095	-2.11175	0.0489934	0.398946	-4.1459	NO
Kcnb2	1.35425	0.889142	2.31247	0.0328274	0.348038	-4.14638	NO
Aurkc	0.766131	-5.06732	1.89983	0.073647	0.461271	-4.14648	NO
Shroom2	-0.965449	4.1264	-2.54074	0.020524	0.302287	-4.15021	NO
Myo16	-1.00491	-3.94967	-1.94515	0.0675953	0.445188	-4.15293	NO
Il17rc	0.582407	6.03636	2.68142	0.0152679	0.274598	-4.15297	NO
Cyp3a41a	2.08638	-2.01372	2.16556	0.0440632	0.388672	-4.15316	NO
Glra3	-0.859243	-5.27943	-1.94854	0.0671622	0.444442	-4.15472	NO
Trpc5	-1.7946	-4.07604	-2.02129	0.0584235	0.422676	-4.15518	NO
Elp6	0.381245	4.17356	2.59414	0.0183533	0.292045	-4.15769	NO
Slc1a6	0.974605	-3.55722	2.07129	0.0530258	0.408259	-4.15873	NO
Wnt6	0.970913	0.305618	2.21173	0.0401994	0.375363	-4.16027	NO
Selenov	-1.65333	-4.592	-1.97363	0.0640243	0.436288	-4.16146	NO
Gad1	-1.40493	-4.6452	-1.96476	0.0651184	0.439259	-4.16263	NO
Siah3	-1.64652	-5.07177	-1.97295	0.0641074	0.436288	-4.16271	NO
Cd22	-0.804031	0.960153	-2.26033	0.0364705	0.362857	-4.16333	NO
Thsd7b	1.88991	-2.79052	2.12039	0.0481693	0.397396	-4.1639	NO
Abcg8	-1.70768	-2.94114	-2.06254	0.0539366	0.41053	-4.16398	NO
St8sia1	-1.15639	0.468714	-2.2239	0.0392343	0.374246	-4.16481	NO
Ppm1h	-0.830884	4.08865	-2.51333	0.02173	0.304004	-4.17063	NO
Lhcgr	-0.749801	0.162828	-2.21291	0.040105	0.375279	-4.17152	NO
Ccar1	-0.292961	6.484	-2.67743	0.0153976	0.275755	-4.17166	NO
Kctd12b	-0.964461	0.985974	-2.26767	0.0359359	0.359893	-4.17291	NO
Apoa2	-1.43281	-4.27713	-1.99075	0.0619596	0.430757	-4.1743	NO
Zfp263	0.261902	5.27668	2.63351	0.0168948	0.287075	-4.17457	NO
Gm44973	-1.73403	-4.74131	-1.96901	0.0645915	0.436901	-4.1751	NO
Zfp324	-1.68577	1.2232	-2.13868	0.0464667	0.394322	-4.17552	NO
Card14	-0.894551	0.107104	-2.16926	0.0437412	0.386885	-4.17573	NO
Cpne6	-1.00347	-5.32575	-1.9601	0.0656989	0.440959	-4.17591	NO
Wnt2	1.13722	-1.39737	2.14538	0.0458564	0.391623	-4.1763	NO
Med17	0.397445	5.58638	2.65789	0.0160474	0.281066	-4.17683	NO
Fosb	-0.785342	2.73668	-2.4237	0.0261579	0.324857	-4.17687	NO
Fam32a	0.40955	7.12066	2.67933	0.0153358	0.275485	-4.17725	NO
Gm11011	0.984801	-3.6501	2.04692	0.0555981	0.41405	-4.17726	NO
Olfr859	-0.660182	1.19236	-2.29155	0.0342468	0.353876	-4.17867	NO
Sgcd	1.17152	-2.69832	2.06862	0.0533023	0.408825	-4.1791	NO
Olfr1109	-1.21088	-1.93227	-2.07856	0.0522801	0.406864	-4.17976	NO
Dlat	0.251653	5.48176	2.60803	0.0178255	0.289292	-4.18005	NO
Mrpl51	0.284161	5.05118	2.60798	0.0178276	0.289292	-4.18055	NO
Abtb1	0.475551	4.90588	2.62801	0.0170917	0.288443	-4.18106	NO
Acss3	1.56694	-1.2101	2.16708	0.0439304	0.387733	-4.18531	NO
Foxe3	-1.67584	-3.78163	-1.9838	0.0627903	0.433237	-4.18614	NO
Egln3	-0.655192	6.43282	-2.61018	0.0177454	0.289292	-4.18669	NO
Tmem191c	0.490189	1.72382	2.33285	0.0314977	0.343099	-4.18772	NO
Siglech	-1.78814	-2.06735	-2.07092	0.0530642	0.408259	-4.18961	NO
Dctn1	0.31678	8.10809	2.65431	0.016169	0.28136	-4.1899	NO
Tnfsf9	0.367888	3.23944	2.46397	0.024073	0.317147	-4.19065	NO
Apol7c	-0.704773	-5.34178	-1.90585	0.0728162	0.459238	-4.19149	NO
Gchfr	0.561708	1.65697	2.37535	0.0288843	0.334538	-4.19319	NO
Vmn1r66	0.575702	-5.13074	1.95918	0.0658151	0.441348	-4.19564	NO
Pou3f3	-0.88332	-1.71106	-2.07112	0.0530434	0.408259	-4.19598	NO
Mtmr10	-0.655235	4.58131	-2.58275	0.0187972	0.294614	-4.19615	NO
Tecta	-1.66059	-4.92344	-1.94745	0.0673014	0.444442	-4.19909	NO
Olfr1414	-1.87488	-4.34353	-1.96363	0.0652584	0.439621	-4.20224	NO
Ppil4	0.228626	5.62663	2.63496	0.016843	0.28698	-4.20234	NO
Strn	-0.416633	6.96656	-2.6109	0.0177182	0.289292	-4.20333	NO
Col20a1	1.19257	1.71617	2.35805	0.029923	0.338318	-4.2055	NO
Cfap20	0.45721	6.08267	2.65043	0.0163023	0.281874	-4.20558	NO
Ccnh	-0.500048	4.77934	-2.60119	0.0180837	0.290875	-4.20952	NO
Egr3	-1.26676	3.32314	-2.39829	0.0275588	0.331749	-4.20996	NO
Dip2c	-0.65473	5.13193	-2.61401	0.0176028	0.289292	-4.21042	NO
Scn1a	1.14228	-4.87763	1.96726	0.0648082	0.437967	-4.21182	NO
Gm29394	-0.682244	-1.02113	-2.04276	0.0560478	0.415552	-4.21231	NO
Copz2	0.516913	4.37027	2.51355	0.0217203	0.304004	-4.21316	NO
Erbb4	-1.44869	0.905737	-2.2168	0.0397949	0.374743	-4.21385	NO
Fam107b	-0.493925	6.83606	-2.64907	0.0163492	0.282023	-4.21418	NO
Crtam	-1.06766	-2.89615	-2.02603	0.0578917	0.420683	-4.21452	NO
Zyg11a	-1.7875	-4.0997	-1.96262	0.065384	0.440046	-4.21629	NO
Icam4	0.926152	-2.37546	2.07344	0.0528048	0.407588	-4.21809	NO
Nars	-0.412206	6.8706	-2.622	0.0173093	0.289279	-4.21934	NO
Emc6	0.317019	5.91198	2.63476	0.0168503	0.28698	-4.22004	NO
Itpr2	-1.18659	5.59891	-2.6071	0.0178605	0.289493	-4.22228	NO
Slc26a6	0.990667	-0.427801	2.16968	0.0437046	0.386885	-4.22338	NO
Fam25c	2.1211	-0.995153	2.16239	0.0443407	0.389491	-4.22913	NO
Mthfd1	-0.330662	5.96731	-2.6308	0.0169913	0.288384	-4.23001	NO
Cwf19l2	0.367608	4.36102	2.55045	0.020112	0.301803	-4.23023	NO
Acot3	0.715456	-5.26651	1.86313	0.0788939	0.473748	-4.2349	NO
Cd177	-1.5189	-3.83773	-1.95641	0.0661624	0.442261	-4.23539	NO
Serpinb1c	-0.655415	-5.22656	-1.88559	0.0756448	0.467607	-4.23604	NO
Mxra8	1.00973	5.28716	2.61921	0.0174113	0.289292	-4.23753	NO
Fam160a1	-0.495608	5.17699	-2.55502	0.0199208	0.30046	-4.2388	NO
Lyst	-0.635407	5.19095	-2.60478	0.0179477	0.290009	-4.23988	NO
Fam228a	0.984008	-2.86608	2.03811	0.0565549	0.417545	-4.23999	NO
Lrat	1.09734	-0.746889	2.0964	0.0504895	0.401861	-4.24007	NO
Clstn3	2.16939	-0.00810469	2.25179	0.037102	0.366794	-4.24208	NO
Traf3ip3	-0.472945	0.397237	-2.18475	0.0424176	0.38158	-4.24261	NO
Bcl2l10	1.60863	-4.88201	1.96877	0.0646209	0.436901	-4.24299	NO
Gfra4	-1.17238	-4.89123	-1.90693	0.0726688	0.458951	-4.24301	NO
Atp8b4	0.707207	0.275593	2.14717	0.0456947	0.391623	-4.24443	NO
Ccdc30	-0.760935	-0.853702	-2.05037	0.0552265	0.413193	-4.24522	NO
Hus1b	0.819859	-3.16621	1.99024	0.06202	0.430851	-4.24555	NO
Tnfrsf14	-1.01724	2.32126	-2.32551	0.0319711	0.344336	-4.24702	NO
Ube2u	-1.01072	-2.76553	-1.99591	0.0613485	0.429685	-4.2501	NO
Ufsp2	0.337922	4.98183	2.58596	0.0186714	0.294614	-4.2505	NO
Ppp6r2	-0.525048	3.95141	-2.44297	0.0251397	0.321446	-4.25275	NO
Cecr2	1.08183	2.59065	2.37966	0.0286309	0.333937	-4.2536	NO
Klk1b24	-0.533988	-5.72756	-1.88	0.076442	0.469327	-4.25369	NO
Gm11634	1.0056	-3.39741	1.98223	0.0629795	0.433344	-4.25444	NO
Sva	-0.53399	-5.72253	-1.87949	0.0765151	0.46939	-4.25445	NO
Csf2ra	-0.558482	3.76071	-2.48239	0.0231721	0.311337	-4.25559	NO
Prn	-0.533993	-5.71207	-1.87843	0.0766681	0.469506	-4.25602	NO
Olfr763	-0.727803	-5.32716	-1.87325	0.0774159	0.470186	-4.25666	NO
Oas1b	-0.533993	-5.70514	-1.87771	0.0767711	0.469617	-4.25708	NO
Olfr1392	-0.534063	-5.69736	-1.87748	0.0768046	0.469617	-4.25738	NO
Fgf3	-1.81948	-4.50053	-1.9261	0.0700838	0.452496	-4.25819	NO
Amd1	0.269299	7.38084	2.64017	0.0166591	0.285701	-4.25927	NO
Ppp1r14c	0.74199	2.63489	2.36395	0.0295647	0.336454	-4.25938	NO
Mfsd1	0.528725	5.77061	2.59412	0.0183542	0.292045	-4.25944	NO
Esp8	-0.533994	-5.68643	-1.87577	0.077051	0.469665	-4.25994	NO
Gadd45gip1	0.317176	5.50879	2.60231	0.0180413	0.290828	-4.26008	NO
Ppp1r13b	-0.510986	5.40666	-2.58036	0.0188918	0.294614	-4.2601	NO
Mier2	0.358339	5.66411	2.60914	0.0177841	0.289292	-4.26037	NO
Eef1a2	-3.27943	-1.73007	-1.92618	0.0700728	0.452496	-4.26161	NO
Zwilch	0.439743	5.4641	2.61889	0.0174231	0.289292	-4.26187	NO
Eml1	-1.04086	3.23982	-2.41649	0.0265483	0.32634	-4.26227	NO
Kif27	-0.638466	2.53361	-2.3323	0.0315328	0.343099	-4.26298	NO
Gm42416	-0.566738	-5.40408	-1.8373	0.0827832	0.480504	-4.26473	NO
Slc37a1	-0.723952	2.07612	-2.24952	0.0372714	0.366794	-4.26495	NO
Glycam1	-1.78162	-4.17411	-1.90337	0.0731573	0.460069	-4.26543	NO
Gpat4	0.336386	7.21846	2.62946	0.0170396	0.288443	-4.26558	NO
Tlk2	-0.452256	5.34538	-2.56432	0.0195371	0.296952	-4.26617	NO
Tmem205	0.667594	3.36902	2.47035	0.0237572	0.315184	-4.26875	NO
Tmeff2	1.67654	1.38854	2.31586	0.0326028	0.347409	-4.26994	NO
Phf1	0.386838	6.19671	2.577	0.0190254	0.294614	-4.27043	NO
Thrap3	-0.341184	7.80624	-2.63685	0.016776	0.286706	-4.27057	NO
Mrps25	0.511948	6.54951	2.63801	0.0167351	0.286339	-4.27093	NO
Gpsm3	-0.384395	5.07406	-2.57854	0.018964	0.294614	-4.27131	NO
Cyp7b1	1.00314	1.54679	2.28908	0.0344183	0.354655	-4.27149	NO
Col6a4	-1.61975	-4.64802	-1.89955	0.073686	0.461271	-4.27425	NO
Aldh3a1	0.825071	0.917057	2.20545	0.040706	0.375924	-4.27426	NO
Psg28	-1.29128	-5.1566	-1.89586	0.0741999	0.463151	-4.2776	NO
Cyp2e1	1.07535	-0.624267	2.09115	0.0510107	0.402794	-4.27807	NO
Txnl4b	0.348424	4.39903	2.54405	0.0203827	0.30218	-4.27811	NO
Bloc1s6	0.214987	4.80649	2.57029	0.0192947	0.295544	-4.27951	NO
Pnmal2	-2.01673	-1.95449	-1.97734	0.063571	0.435401	-4.2807	NO
Olfr10	0.764808	-5.20171	1.87278	0.0774834	0.470251	-4.2827	NO
Crtac1	2.19085	3.3905	2.46302	0.02412	0.317147	-4.2828	NO
Fam81b	-1.11836	-4.52216	-1.91399	0.0717069	0.45585	-4.28319	NO
Arhgap39	-0.514782	4.40225	-2.52333	0.0212825	0.302757	-4.28405	NO
Slc6a13	-1.12665	-1.71593	-2.02134	0.0584178	0.422676	-4.28426	NO
Klhl15	-0.386202	4.71411	-2.54131	0.0204995	0.302287	-4.28704	NO
Adh7	2.01012	0.0679912	2.22098	0.0394638	0.374413	-4.28991	NO
Cog8	0.281518	5.88189	2.58194	0.0188291	0.294614	-4.29109	NO
Elfn2	-1.0583	-5.29711	-1.89182	0.0747647	0.465224	-4.29151	NO
Tmem131l	-0.268611	6.23797	-2.60913	0.0177843	0.289292	-4.29184	NO
Wnt5a	1.40882	3.13884	2.40006	0.0274591	0.331259	-4.29191	NO
Usp48	-0.401485	6.32081	-2.61945	0.0174027	0.289292	-4.29284	NO
Megf8	-0.650479	4.32182	-2.48644	0.0229782	0.31036	-4.29372	NO
Plpp3	-0.884149	3.86534	-2.45364	0.0245921	0.318253	-4.29496	NO
Shd	-0.856683	-0.865189	-2.05066	0.055196	0.413193	-4.2952	NO
Syn2	-2.12252	-0.921995	-2.00461	0.0603317	0.426855	-4.29608	NO
Gm8159	-2.17458	-4.21478	-1.90418	0.0730453	0.459832	-4.29649	NO
Dctd	0.582324	2.48505	2.33199	0.0315529	0.343099	-4.29722	NO
Olfr1280	-0.53409	-5.43075	-1.85008	0.0808388	0.479473	-4.29764	NO
Trem3	1.00193	-4.4108	1.88839	0.0752486	0.46725	-4.29834	NO
Iffo1	-2.14938	-2.80548	-1.91171	0.0720165	0.456981	-4.30092	NO
Myl3	-1.2525	-5.32265	-1.87311	0.0774359	0.470186	-4.30096	NO
Ccdc87	1.00774	-3.34321	1.95088	0.0668635	0.443507	-4.30104	NO
Junb	0.403294	8.65081	2.61125	0.0177055	0.289292	-4.30246	NO
Ugt1a2	-0.532603	-5.67805	-1.83858	0.0825861	0.480504	-4.3054	NO
Ccdc121	2.56761	-2.38384	2.02652	0.0578369	0.420683	-4.3063	NO
Slc7a6os	0.359264	5.49262	2.58554	0.0186877	0.294614	-4.30652	NO
Trpm1	-1.42069	-4.77575	-1.8764	0.0769601	0.469665	-4.3075	NO
Sdr39u1	0.557633	4.52169	2.54552	0.0203203	0.302093	-4.30807	NO
Gimap9	0.441546	3.84188	2.48037	0.0232691	0.311924	-4.30823	NO
Poli	-0.59418	3.65812	-2.39423	0.0277895	0.332259	-4.30997	NO
Ndst1	-0.668606	7.31143	-2.57582	0.0190721	0.294614	-4.31058	NO
Gm12887	-0.93134	-4.54555	-1.8581	0.0796383	0.475417	-4.31083	NO
Sema4a	-0.756974	4.94402	-2.52435	0.0212375	0.302757	-4.31344	NO
Otof	-2.41571	-3.50732	-1.91857	0.0710894	0.455294	-4.31449	NO
Magi2	-1.24765	2.51291	-2.28007	0.0350499	0.356592	-4.31549	NO
Exoc3	-0.308919	5.76131	-2.59481	0.0183275	0.292045	-4.31653	NO
Cd24a	0.679865	8.7466	2.61133	0.0177022	0.289292	-4.31835	NO
Mcf2	-0.595761	-5.12684	-1.80338	0.0881447	0.491925	-4.31853	NO
Pgm5	1.86389	0.693695	2.17845	0.0429513	0.385309	-4.31887	NO
Pbp2	-0.728186	-1.72741	-2.00404	0.0603978	0.426855	-4.31911	NO
Sirpb1b	1.17649	-2.79086	1.95043	0.0669202	0.443507	-4.31964	NO
Tex13b	-1.05143	-3.42921	-1.92835	0.0697856	0.451557	-4.32079	NO
Endou	-0.72904	-2.13257	-1.99425	0.0615441	0.430013	-4.32148	NO
Izumo1r	-1.31015	-2.9876	-1.91488	0.0715858	0.45585	-4.3225	NO
Lamtor3	0.214442	5.56591	2.53971	0.020568	0.302287	-4.32251	NO
Smn1	-0.287715	5.1981	-2.54515	0.020336	0.302093	-4.32258	NO
Cdk13	-0.366439	6.7805	-2.61099	0.0177152	0.289292	-4.32486	NO
Eps8l2	-0.478562	6.37254	-2.56407	0.0195474	0.296952	-4.32613	NO
Nrg2	-1.93174	-0.419945	-2.0528	0.0549669	0.412446	-4.3283	NO
Ankrd63	-1.10207	-0.352722	-2.0809	0.0520421	0.406374	-4.32947	NO
Tmem130	0.788217	-1.24684	2.06553	0.0536236	0.409732	-4.33243	NO
Dll3	-0.733836	-1.32494	-2.04284	0.0560392	0.415552	-4.33255	NO
Foxp3	-0.821572	0.229167	-2.13166	0.0471132	0.395269	-4.33328	NO
Olfr111	-0.937427	-1.22704	-2.03146	0.0572868	0.420062	-4.33335	NO
Rxylt1	-0.503738	2.10322	-2.29116	0.0342741	0.35391	-4.33494	NO
Orm1	2.01812	-1.59773	2.07247	0.0529047	0.407933	-4.33691	NO
Rsl24d1	0.365204	6.07897	2.59463	0.0183344	0.292045	-4.33857	NO
Nt5c1b	-1.05356	-5.29492	-1.8534	0.0803402	0.47777	-4.33863	NO
Ankrd65	1.8025	-3.67559	1.96438	0.0651649	0.439372	-4.33896	NO
Catspere2	-1.3206	-3.55924	-1.9299	0.0695807	0.451221	-4.33982	NO
Cdpf1	0.486759	3.05309	2.40304	0.027292	0.330176	-4.34035	NO
Celsr3	0.821654	-1.78129	2.02246	0.0582923	0.422347	-4.34053	NO
Pik3c2a	-0.763262	4.3184	-2.39804	0.0275732	0.331749	-4.34137	NO
Gm28434	-0.533124	-5.45886	-1.82336	0.0849505	0.485817	-4.34144	NO
Ap4m1	0.281337	6.60717	2.57702	0.0190246	0.294614	-4.34214	NO
D6Wsu163e	0.328611	4.0307	2.4861	0.0229943	0.31036	-4.34539	NO
Tbx4	-1.32445	-4.6778	-1.84679	0.081335	0.479871	-4.34594	NO
Sem1	0.481008	7.70198	2.59811	0.0182012	0.291496	-4.34627	NO
Olfr129	0.657682	-1.18535	2.06469	0.0537118	0.410087	-4.34707	NO
Tspan33	-0.553727	4.18653	-2.41665	0.0265394	0.32634	-4.3481	NO
Olfr60	-1.22876	-3.9757	-1.87569	0.0770632	0.469665	-4.34816	NO
Lrrc7	-1.44198	-2.152	-1.93017	0.0695445	0.451221	-4.34956	NO
Srcap	-0.348925	7.18796	-2.5876	0.018607	0.294614	-4.35313	NO
Gm45844	-1.31631	1.78283	-2.24159	0.0378689	0.367634	-4.35548	NO
Ppp1r3f	-0.773247	3.08266	-2.31239	0.0328333	0.348038	-4.35657	NO
Tle1	-0.270571	5.90734	-2.56437	0.019535	0.296952	-4.35764	NO
Lrrc42	-0.313956	5.58547	-2.55603	0.0198789	0.300442	-4.35788	NO
Cacna1h	-1.67899	-1.48915	-1.96998	0.064472	0.436901	-4.35866	NO
Adam32	0.682089	-1.2448	1.97872	0.0634042	0.434947	-4.35933	NO
Cdkn1b	0.526415	8.29338	2.58055	0.0188843	0.294614	-4.3605	NO
Spry4	-0.782748	3.8908	-2.44355	0.0251098	0.321446	-4.3617	NO
Crybb2	-0.616709	-5.45467	-1.75964	0.0955045	0.508004	-4.36181	NO
Polk	-0.384179	4.37422	-2.46057	0.0242428	0.317223	-4.36233	NO
Acot6	-0.663576	1.67651	-2.23244	0.0385696	0.370539	-4.36247	NO
Gm10320	1.27515	-3.30636	1.94754	0.0672892	0.444442	-4.36357	NO
Terf1	0.305242	6.02341	2.54149	0.0204919	0.302287	-4.36377	NO
Phf2	-0.433192	6.7447	-2.58822	0.0185831	0.294614	-4.36395	NO
Dnali1	1.51211	-2.20275	2.01341	0.0593174	0.424594	-4.3643	NO
Bcl9l	0.292104	7.82743	2.54535	0.0203274	0.302093	-4.36457	NO
Kcnmb2	2.05539	2.85944	2.33264	0.0315112	0.343099	-4.36571	NO
Cyb561	-0.477994	6.31971	-2.5789	0.0189497	0.294614	-4.36612	NO
Odc1	-0.303855	6.24674	-2.574	0.019145	0.294614	-4.36701	NO
Tacc2	0.558876	6.42895	2.57232	0.0192128	0.294989	-4.36954	NO
Catsperz	-1.46312	-3.47347	-1.87109	0.0777289	0.471547	-4.36954	NO
Atg7	0.553691	6.30531	2.57537	0.0190903	0.294614	-4.37022	NO
Cidec	5.01193	-1.80257	2.07824	0.0523123	0.406864	-4.37256	NO
Wnt9b	-1.44171	-4.93495	-1.83216	0.0835771	0.482258	-4.37296	NO
Pdcd7	0.461638	5.19591	2.53444	0.0207954	0.302757	-4.37448	NO
Slf1	-0.384128	4.68788	-2.50909	0.0219224	0.304411	-4.37785	NO
Vsig8	1.79134	-0.520571	2.06569	0.0536071	0.409732	-4.37793	NO
Ppm1m	0.410875	5.3181	2.55052	0.0201091	0.301803	-4.3786	NO
Lhx2	1.14907	5.6607	2.54724	0.0202472	0.302093	-4.37869	NO
Ifi213	-1.26736	-1.6654	-1.9295	0.069634	0.451368	-4.37993	NO
Imp3	0.305223	5.71255	2.51021	0.0218715	0.304386	-4.38104	NO
Cfhr1	-0.962458	-2.13735	-1.94747	0.0672986	0.444442	-4.38151	NO
Rtl5	-1.34461	0.555947	-2.10837	0.0493192	0.399258	-4.38478	NO
Ccr10	-0.959498	-2.30058	-1.97319	0.0640778	0.436288	-4.38517	NO
Gm10961	-1.04022	-5.09932	-1.83273	0.0834885	0.482124	-4.38529	NO
Trim23	-0.408075	4.61754	-2.48626	0.0229868	0.31036	-4.38546	NO
Timm44	0.308371	5.71728	2.54654	0.0202769	0.302093	-4.38658	NO
Folr1	-1.09702	-1.09441	-1.97732	0.0635734	0.435401	-4.38718	NO
Mecp2	-0.296176	6.44278	-2.5205	0.0214083	0.302757	-4.38846	NO
Eif3g	0.443651	7.17756	2.57432	0.0191321	0.294614	-4.3896	NO
Il1r2	-0.810829	-1.04961	-2.00213	0.06062	0.426855	-4.39063	NO
Zfp511	0.387252	5.12201	2.53909	0.0205946	0.302287	-4.39084	NO
Sugp1	0.245605	5.96486	2.53931	0.0205853	0.302287	-4.39133	NO
Elovl1	-0.267666	6.7458	-2.53449	0.0207931	0.302757	-4.39177	NO
Zfp990	-1.97813	-3.41422	-1.89047	0.0749557	0.465823	-4.39384	NO
Alas1	-0.950344	3.06996	-2.31897	0.0323979	0.346156	-4.39557	NO
Nog	1.96755	-2.35226	1.94037	0.0682121	0.447362	-4.39593	NO
Pias4	0.384599	5.48639	2.53589	0.0207324	0.302757	-4.39621	NO
Timm8a2	0.767059	-2.85554	1.94097	0.0681346	0.447343	-4.39665	NO
Scn2a	-1.54094	-2.12214	-1.92038	0.0708457	0.455294	-4.39721	NO
Wee2	-1.46076	-4.08708	-1.81694	0.0859661	0.488785	-4.39729	NO
Ccin	0.789667	-5.23477	1.7724	0.093304	0.503428	-4.39876	NO
Kcnt2	-2.50303	-3.78515	-1.8455	0.0815302	0.480027	-4.4056	NO
Cep350	-0.4671	5.64931	-2.52816	0.0210694	0.302757	-4.40563	NO
Col18a1	-0.684816	7.17085	-2.5542	0.0199549	0.300668	-4.40575	NO
Olfr1162	-1.44342	-3.626	-1.85186	0.0805713	0.478817	-4.40735	NO
Sdk2	2.37015	2.47446	2.32993	0.0316852	0.343099	-4.40844	NO
Lrp5	-0.617447	6.84156	-2.55663	0.019854	0.300373	-4.40879	NO
Nefh	-0.844049	-0.199089	-2.05233	0.0550177	0.412446	-4.40898	NO
Olfr130	-1.48059	-5.15135	-1.80848	0.0873195	0.490582	-4.40923	NO
Sharpin	-0.437817	3.87856	-2.4053	0.0271657	0.330147	-4.41115	NO
Tsnaxip1	0.717781	-0.462085	2.00239	0.0605895	0.426855	-4.41252	NO
Cmpk2	-1.07344	3.1221	-2.24496	0.0376137	0.366794	-4.41256	NO
Akr7a5	-0.336694	5.1904	-2.48499	0.0230476	0.310796	-4.41619	NO
Lrrc49	0.425	5.54287	2.52758	0.0210949	0.302757	-4.41718	NO
Lyrm4	-0.389158	4.04615	-2.4355	0.0255299	0.322097	-4.41731	NO
Pkd1l1	-1.89057	-2.68929	-1.87826	0.076693	0.469506	-4.41745	NO
Sass6	-0.541774	1.99765	-2.2204	0.0395094	0.374413	-4.4179	NO
Galr2	-0.959768	-1.38164	-1.97923	0.0633417	0.434823	-4.41795	NO
Kcng4	-0.63642	-5.24269	-1.75369	0.096546	0.50896	-4.41831	NO
Tnfrsf4	-0.695136	2.31619	-2.27014	0.0357581	0.358942	-4.41983	NO
Vmn1r26	-0.609894	0.637421	-2.11426	0.0487533	0.398946	-4.42026	NO
Ubxn8	0.279163	5.30986	2.52257	0.0213162	0.302757	-4.42062	NO
Usp2	0.830075	4.02374	2.44613	0.0249762	0.320694	-4.42088	NO
Zfp707	0.411991	3.80576	2.44136	0.0252235	0.321446	-4.4213	NO
Caskin1	-0.636787	2.68923	-2.29456	0.0340391	0.353035	-4.422	NO
E2f3	-0.556788	4.9582	-2.49152	0.0227373	0.308548	-4.42314	NO
Cenpp	-0.325996	3.58355	-2.35099	0.0303565	0.339322	-4.42407	NO
Ppard	-0.270888	5.91185	-2.54699	0.0202576	0.302093	-4.42479	NO
Spry1	-0.255838	5.55959	-2.52404	0.021251	0.302757	-4.42564	NO
Popdc2	1.48789	-0.0779039	2.09006	0.0511192	0.402902	-4.42569	NO
Ahr	0.725872	6.50372	2.54835	0.0202005	0.302093	-4.42782	NO
Gm42791	0.933912	-2.96441	1.90139	0.0734306	0.461198	-4.42796	NO
Sema3g	-1.05563	2.29859	-2.19946	0.0411945	0.378047	-4.4281	NO
Rps25	0.462537	8.85561	2.52894	0.021035	0.302757	-4.4286	NO
Cd69	-1.33875	-0.0089809	-2.0323	0.0571942	0.420062	-4.43261	NO
Gm5796	-0.69782	-4.94247	-1.74614	0.0978812	0.511099	-4.43389	NO
Cdkl4	1.1296	-2.5019	1.9384	0.068468	0.44782	-4.43409	NO
Ptprt	1.30604	-1.32499	1.89203	0.0747352	0.465224	-4.43482	NO
Fkbp10	1.09485	5.34163	2.49378	0.0226313	0.307928	-4.43554	NO
Nectin1	0.755056	6.21131	2.54303	0.0204262	0.302287	-4.43567	NO
Mmp16	-1.94649	-3.32959	-1.82726	0.0843398	0.484322	-4.4362	NO
Gdf9	0.678623	-1.4315	1.98068	0.063166	0.433957	-4.4379	NO
Patl2	-1.42139	-4.45545	-1.82232	0.0851146	0.486379	-4.43806	NO
Rnaseh2a	0.253916	6.30745	2.52966	0.0210038	0.302757	-4.44103	NO
Timm13	0.292184	5.72254	2.51173	0.0218028	0.304004	-4.44141	NO
Gzma	-2.12882	-3.29259	-1.84171	0.0821077	0.480504	-4.44185	NO
Ttc30a1	-0.709276	2.37732	-2.18399	0.0424818	0.38158	-4.44235	NO
Cpne5	-1.21187	-3.24195	-1.80833	0.0873428	0.490582	-4.44261	NO
Wdr27	1.11033	-3.68418	1.82861	0.0841277	0.483734	-4.44345	NO
Col4a5	-0.658779	6.77343	-2.50384	0.0221632	0.305612	-4.44379	NO
Spats1	-0.598897	-1.24928	-1.85647	0.0798819	0.476195	-4.4451	NO
Alg3	0.453741	3.77079	2.38681	0.0282152	0.333286	-4.44554	NO
Mre11a	0.307361	6.11924	2.5222	0.0213326	0.302757	-4.44572	NO
Rsph6a	-0.814637	-5.19905	-1.74802	0.0975482	0.510417	-4.4472	NO
Fmn2	-2.87988	-2.72701	-1.80206	0.0883587	0.492224	-4.4473	NO
Pcdha8	-0.522896	-5.44032	-1.73328	0.100194	0.514597	-4.44754	NO
Gpt2	-0.556678	4.9472	-2.46201	0.0241706	0.317223	-4.44781	NO
Trpc6	-0.930288	0.637934	-2.09003	0.0511227	0.402902	-4.44971	NO
Cda	-0.608025	0.00899789	-1.97421	0.0639536	0.436288	-4.45059	NO
Ppp1r3g	1.22692	-4.56479	1.84205	0.0820547	0.480504	-4.45179	NO
Prr27	-1.3745	-5.10639	-1.76896	0.0938924	0.504701	-4.45227	NO
P2rx7	-0.728413	5.68185	-2.51453	0.021676	0.303958	-4.45246	NO
Usp45	-0.452204	4.35677	-2.41201	0.026794	0.327788	-4.45275	NO
Olfr364-ps1	-1.38089	-4.68924	-1.80264	0.0882653	0.492224	-4.45301	NO
Nr2f1	-0.883002	0.731608	-2.07513	0.0526305	0.407257	-4.45334	NO
Akna	-0.306245	5.2101	-2.47672	0.0234458	0.312472	-4.45383	NO
Ski	-0.43781	6.89105	-2.54438	0.0203687	0.30218	-4.45387	NO
Lmbr1l	0.289355	4.53188	2.45797	0.0243733	0.317839	-4.45672	NO
Ncam1	1.08364	4.85947	2.47909	0.0233311	0.311924	-4.45686	NO
Zmat1	-0.733755	2.87275	-2.27944	0.0350944	0.356592	-4.45715	NO
Id1	0.672344	6.65738	2.51893	0.0214784	0.302757	-4.45935	NO
Slco2a1	-0.683279	6.9026	-2.5348	0.0207799	0.302757	-4.45953	NO
Mst1	1.09975	-1.30989	2.00327	0.0604874	0.426855	-4.46016	NO
Tfeb	-0.4914	5.28007	-2.45387	0.0245806	0.318253	-4.46072	NO
Adipor2	0.255084	7.20571	2.53255	0.0208777	0.302757	-4.46197	NO
Malrd1	-1.12963	-4.31653	-1.78564	0.0910671	0.497852	-4.46283	NO
Kcnh7	-0.486107	1.68421	-2.03398	0.0570086	0.419426	-4.46314	NO
Hoxc8	-0.978874	-1.38563	-1.94012	0.0682447	0.447362	-4.46426	NO
Lmtk3	0.674244	3.88375	2.42194	0.0262523	0.325475	-4.46428	NO
Tg	-1.15345	-4.14805	-1.78058	0.091916	0.499166	-4.4648	NO
E2f8	-0.275807	6.40464	-2.49532	0.0225588	0.307859	-4.46604	NO
Rprm	-1.1858	-2.901	-1.83558	0.0830476	0.481083	-4.46909	NO
Gm49322	-0.722279	-4.91024	-1.74141	0.0987263	0.512927	-4.46934	NO
Senp7	-0.348016	4.47422	-2.39696	0.0276345	0.331749	-4.47207	NO
Gm6902	1.20134	-4.96257	1.77448	0.0929502	0.50238	-4.47324	NO
Crtc3	-0.435558	5.47185	-2.49949	0.0223642	0.306366	-4.47335	NO
L2hgdh	-0.527591	3.76932	-2.37158	0.0291074	0.335781	-4.47338	NO
Vps41	-0.230715	5.80607	-2.49343	0.0226473	0.307928	-4.47444	NO
Epop	-0.965738	5.17257	-2.45252	0.0246493	0.318714	-4.475	NO
Slc7a3	-0.501041	2.37216	-2.22259	0.0393371	0.374413	-4.47604	NO
Adgrf4	1.14202	1.07086	2.14536	0.0458579	0.391623	-4.47685	NO
Ice1	-0.733848	5.50804	-2.48832	0.0228891	0.309789	-4.47791	NO
Casp1	0.443896	4.52066	2.3782	0.0287166	0.334025	-4.47824	NO
Mcam	0.615807	6.70048	2.5204	0.0214128	0.302757	-4.48009	NO
Afp	0.810977	-3.48907	1.8126	0.0866583	0.489517	-4.48137	NO
Slc30a5	-0.657921	5.14923	-2.47527	0.0235165	0.313115	-4.48297	NO
Etfb	0.354413	5.24501	2.45573	0.0244864	0.31819	-4.48323	NO
Pcdhac1	-0.692702	-5.28859	-1.73804	0.0993326	0.513027	-4.48456	NO
Ltb	-0.460662	0.934161	-2.09674	0.0504556	0.401861	-4.48477	NO
Ckap4	0.474397	7.25909	2.52218	0.0213337	0.302757	-4.48501	NO
Rasa1	-0.612824	7.36569	-2.53029	0.0209761	0.302757	-4.48529	NO
Rragd	-1.15748	1.74996	-2.09958	0.0501764	0.40166	-4.48537	NO
Mta3	-0.435788	6.12469	-2.50687	0.0220239	0.304785	-4.48752	NO
Olfm1	-0.980083	3.7127	-2.34873	0.0304967	0.340117	-4.48829	NO
Fads2	-0.505014	6.1655	-2.50882	0.021935	0.304411	-4.48964	NO
Lce1c	-0.518213	-5.38688	-1.70572	0.105308	0.526176	-4.48972	NO
Mlh3	-0.550238	3.33158	-2.31072	0.0329444	0.348465	-4.49152	NO
Aig1	0.357767	6.05347	2.50775	0.0219839	0.304516	-4.49164	NO
Acd	0.55144	3.11175	2.32385	0.0320787	0.344933	-4.49224	NO
Fgfr2	1.30008	3.2544	2.33766	0.0311916	0.343099	-4.49238	NO
Fnip2	0.398976	5.57437	2.47922	0.0233249	0.311924	-4.49299	NO
Samd1	0.654966	5.54876	2.47999	0.0232877	0.311924	-4.49337	NO
Tmprss11d	0.531452	-0.107887	1.95916	0.0658166	0.441348	-4.49387	NO
Gpc3	-0.698952	2.83391	-2.26004	0.0364921	0.362857	-4.49478	NO
Gdf1	0.78186	-0.685062	1.99572	0.0613711	0.429685	-4.49682	NO
Npb	0.838149	0.455847	2.09197	0.0509289	0.402733	-4.49772	NO
Ralgps2	0.534242	4.55402	2.39773	0.0275907	0.331749	-4.49788	NO
Olfr432	-0.81589	-2.01934	-1.89139	0.0748263	0.465411	-4.49845	NO
Gm45521	-0.619316	-5.36784	-1.70041	0.106318	0.526888	-4.49874	NO
Krt71	1.67946	-2.88881	1.89532	0.0742748	0.463151	-4.49953	NO
Samd3	-1.2124	-4.10798	-1.7366	0.0995913	0.513027	-4.50135	NO
Csn3	-3.95545	3.10071	-2.13481	0.0468217	0.394876	-4.50406	NO
Sox1	0.947969	-3.58551	1.82883	0.0840934	0.483725	-4.5048	NO
Cnn1	1.03691	2.24829	2.22012	0.0395316	0.374413	-4.50481	NO
Itprid1	-1.10492	0.116547	-1.99954	0.0609226	0.428166	-4.50517	NO
Commd4	0.409033	4.67756	2.46327	0.0241074	0.317147	-4.50528	NO
Slc6a20b	0.606211	0.501235	2.08875	0.0512501	0.403389	-4.50543	NO
Necab2	-1.65992	-4.01547	-1.79255	0.0899187	0.495425	-4.50663	NO
Arid4b	-0.376078	5.63037	-2.48967	0.022825	0.309205	-4.50689	NO
Mrpl23	0.539506	0.816626	2.05468	0.0547673	0.411968	-4.50716	NO
Cdiptos	1.75826	-2.98894	1.88653	0.0755113	0.467607	-4.508	NO
Ndufb5	0.291713	5.94289	2.49114	0.0227556	0.308548	-4.5087	NO
Golim4	-0.678084	7.53095	-2.51824	0.0215091	0.302757	-4.50887	NO
Catsper3	0.693501	-4.17672	1.81394	0.0864441	0.489511	-4.51001	NO
Olfr305	1.20622	-4.54229	1.78287	0.0915322	0.49896	-4.51248	NO
Abhd1	-0.553124	-5.32252	-1.71182	0.104156	0.524545	-4.51292	NO
Hspb7	-1.06482	0.203747	-1.94396	0.0677493	0.445665	-4.51323	NO
Rnf14	-0.489204	5.20873	-2.44748	0.0249069	0.320641	-4.5133	NO
Olfr346	-1.51822	-3.94739	-1.76633	0.0943457	0.505482	-4.51445	NO
Arid3c	0.768829	-1.59721	1.94558	0.067541	0.445029	-4.51513	NO
Orm3	1.55844	-4.08352	1.78619	0.0909749	0.497716	-4.51723	NO
Slc38a11	-1.02	-5.25009	-1.72184	0.10229	0.519342	-4.51853	NO
Cfap57	-0.845654	-3.71612	-1.79784	0.0890477	0.493862	-4.51884	NO
Tmigd1	-1.99402	-4.49574	-1.73686	0.0995447	0.513027	-4.51945	NO
Svs6	-0.51708	-5.64602	-1.70278	0.105866	0.526878	-4.5195	NO
Gata3	-0.38854	6.18386	-2.49855	0.0224079	0.306366	-4.51978	NO
Klrb1a	-2.19326	1.12219	-2.03634	0.0567487	0.418557	-4.52131	NO
Tmprss4	1.26439	-1.11346	1.91837	0.0711151	0.455294	-4.52525	NO
Dnm1l	-0.381281	6.2928	-2.43215	0.0257065	0.322774	-4.52598	NO
Fam90a1a	-0.517072	-5.58815	-1.69794	0.106791	0.527032	-4.52623	NO
Fez1	1.12171	-1.70886	1.88691	0.0754581	0.467607	-4.52797	NO
Stard3nl	-0.31312	4.56898	-2.41768	0.0264834	0.32634	-4.52882	NO
Dnajb7	1.02742	-1.86572	1.91954	0.0709585	0.455294	-4.52882	NO
Olfr1087	-1.00752	-3.9233	-1.70982	0.104533	0.525191	-4.52948	NO
Kl	-1.0669	-1.98586	-1.86473	0.0786589	0.473503	-4.53049	NO
Pcca	0.344345	3.258	2.30385	0.033406	0.35055	-4.53185	NO
Mfsd14b	-0.332231	6.61599	-2.49471	0.0225875	0.307928	-4.532	NO
Sncaip	1.01243	0.297292	2.0246	0.0580514	0.421636	-4.53263	NO
Lrrc39	0.468251	1.60562	2.14622	0.0457809	0.391623	-4.53271	NO
Mif	0.462854	8.08142	2.47236	0.0236584	0.314155	-4.53278	NO
Gm49527	-0.517069	-5.52983	-1.69319	0.107705	0.528539	-4.53281	NO
Spx	-2.72757	-3.25482	-1.79753	0.0890998	0.493862	-4.53368	NO
Slamf6	-0.775022	0.407474	-2.00644	0.0601196	0.426855	-4.53375	NO
Selenok	0.490102	4.58347	2.41688	0.0265273	0.32634	-4.53431	NO
Mup2	-0.517069	-5.51488	-1.69199	0.107938	0.528802	-4.53447	NO
Cldn8	-1.28628	3.33958	-2.23714	0.0382079	0.368851	-4.53544	NO
Hs3st5	-0.517073	-5.48988	-1.69008	0.108309	0.529918	-4.53711	NO
Carns1	-0.69498	1.96373	-2.1393	0.0464099	0.39407	-4.53928	NO
Tmod4	0.863805	3.43418	2.29961	0.0336934	0.351469	-4.53935	NO
Gm15217	-0.786605	-5.22146	-1.7008	0.106244	0.526888	-4.53975	NO
Palmd	0.785203	7.01687	2.49723	0.0224694	0.306923	-4.54051	NO
Pom121l2	-1.47093	-2.07081	-1.84535	0.0815535	0.480027	-4.54204	NO
Lrrc30	-0.793539	-4.46063	-1.69653	0.107062	0.52765	-4.54504	NO
Klk1b16	-0.571194	-5.5702	-1.68058	0.110166	0.532399	-4.54525	NO
Slc12a1	0.921206	-4.48491	1.77282	0.093232	0.50335	-4.54561	NO
Adpgk	0.447334	4.21909	2.35576	0.0300628	0.338413	-4.54595	NO
Wdr36	-0.440406	5.49509	-2.43764	0.0254173	0.321446	-4.54649	NO
Fbxl17	-0.338918	4.23302	-2.3606	0.0297677	0.337596	-4.54783	NO
Gabrg3	-0.922635	-2.67383	-1.83127	0.0837145	0.482317	-4.54812	NO
Dnah9	1.20665	-4.21593	1.78398	0.0913462	0.498665	-4.54825	NO
Cphx1	2.21452	-4.31211	1.80054	0.0886076	0.492613	-4.54906	NO
Astn2	-0.943232	-0.631823	-1.95039	0.0669256	0.443507	-4.5497	NO
Klk1b3	-0.571192	-5.50805	-1.6765	0.110972	0.533593	-4.55086	NO
Mtcp1	-0.52317	2.7396	-2.21818	0.039685	0.374413	-4.55096	NO
Pcdhb5	-0.727391	-0.736831	-1.94443	0.0676879	0.445599	-4.55187	NO
Dgkg	-1.65504	-2.99515	-1.78129	0.0917965	0.499053	-4.55199	NO
Rpa3	0.253	5.29125	2.45366	0.0245909	0.318253	-4.55215	NO
Pls1	1.29415	1.75467	2.13055	0.0472161	0.39544	-4.55631	NO
St6galnac2	-0.47409	6.21376	-2.4599	0.0242762	0.317223	-4.55676	NO
Lrrn2	-0.908413	1.7856	-2.10623	0.0495267	0.399524	-4.55697	NO
Slitrk4	-1.27706	-3.28653	-1.78184	0.0917048	0.49896	-4.55992	NO
Fsd1	1.23507	0.48829	2.088	0.051325	0.40351	-4.55996	NO
Olfr576	-0.596245	-1.28073	-1.89578	0.0742106	0.463151	-4.55997	NO
Tsks	-1.11745	-2.88953	-1.81442	0.0863662	0.489511	-4.56002	NO
Dnajc5	0.230187	6.64533	2.49136	0.0227448	0.308548	-4.56172	NO
Luzp2	-1.25168	-3.57602	-1.70363	0.105705	0.526612	-4.56268	NO
Gpbar1	-1.65348	-2.55729	-1.79049	0.0902603	0.495732	-4.56394	NO
Xlr3a	3.91041	-1.73537	1.95032	0.0669351	0.443507	-4.56405	NO
Klk1b22	-0.568431	-5.4605	-1.66461	0.113353	0.535778	-4.56575	NO
Fundc2	0.373543	5.26978	2.38962	0.0280531	0.333252	-4.56686	NO
Igfn1	-0.666696	-5.16685	-1.68587	0.109129	0.531233	-4.56688	NO
Syt4	1.12515	-4.70933	1.77344	0.093126	0.502962	-4.56717	NO
Ldlr	-0.566225	5.78443	-2.46138	0.024202	0.317223	-4.56992	NO
Plcxd1	1.31042	-3.00424	1.80241	0.0883021	0.492224	-4.57064	NO
Crtc2	-0.355666	5.03168	-2.42358	0.0261642	0.324857	-4.57424	NO
Golga1	-0.479329	3.87158	-2.32165	0.0322221	0.345026	-4.57452	NO
Hapln2	-1.43303	-4.79585	-1.68349	0.109594	0.531233	-4.57513	NO
Otud6a	-0.795891	-3.06939	-1.79628	0.0893045	0.494517	-4.57703	NO
Arl6ip5	0.403823	6.62966	2.4767	0.023447	0.312472	-4.57794	NO
Scgb3a2	-0.528619	-5.43482	-1.62085	0.122488	0.547143	-4.57795	NO
Scgb2b26	-0.563255	-5.48767	-1.65511	0.115286	0.538179	-4.57835	NO
Sdsl	1.91293	-2.76291	1.88368	0.0759174	0.467607	-4.58082	NO
Adad1	1.04131	-5.03804	1.65635	0.115031	0.538179	-4.58239	NO
Rpl10l	-1.38218	-4.60601	-1.70919	0.104652	0.525296	-4.58255	NO
Emilin3	-1.25393	-1.70411	-1.85064	0.0807534	0.479262	-4.5826	NO
Fbxl2	0.848092	0.969817	2.10931	0.0492288	0.398964	-4.58272	NO
Olfr1234	-0.981403	-3.18596	-1.7157	0.10343	0.52321	-4.58285	NO
Glb1l2	1.65207	-0.222449	1.96914	0.0645761	0.436901	-4.58309	NO
Cul5	0.358635	5.85656	2.45725	0.0244094	0.317839	-4.58371	NO
Wnt7b	-1.01413	6.50657	-2.45069	0.0247424	0.319359	-4.58424	NO
Nfkbib	-0.364979	4.50426	-2.38337	0.0284146	0.333286	-4.58469	NO
Spata45	-1.32377	-4.3033	-1.70934	0.104624	0.525296	-4.58591	NO
Timp4	1.47145	-3.79277	1.78914	0.0904844	0.496504	-4.58731	NO
Fam181b	-1.72264	-1.68618	-1.83707	0.0828175	0.480504	-4.58826	NO
Pla2g4e	-0.685795	-4.61149	-1.66007	0.114273	0.537569	-4.58994	NO
Aggf1	-0.336843	5.92284	-2.46021	0.0242608	0.317223	-4.59086	NO
Fnd3c2	-0.645892	-3.545	-1.76312	0.0949004	0.506067	-4.59218	NO
Srpr	0.314638	7.0807	2.47253	0.0236502	0.314155	-4.59264	NO
Ttll7	0.750616	5.04658	2.41725	0.026507	0.32634	-4.59396	NO
Atp5h	0.217933	7.37657	2.44189	0.0251956	0.321446	-4.59541	NO
Frat2	0.635393	2.7263	2.21341	0.0400649	0.375279	-4.59545	NO
Ptger3	1.31758	-0.810787	1.95332	0.066554	0.442873	-4.59647	NO
Gal3st2	1.52916	-2.47063	1.8572	0.0797728	0.475747	-4.59679	NO
Kctd14	0.939529	3.95516	2.35638	0.0300247	0.338413	-4.5968	NO
Ubl7	0.38986	5.86362	2.44619	0.0249734	0.320694	-4.59828	NO
Itga1	-0.695024	3.6648	-2.27263	0.0355789	0.357668	-4.59833	NO
Rev3l	-0.840207	3.12509	-2.19508	0.0415551	0.37994	-4.59842	NO
Zfp667	-0.650095	2.21574	-2.13741	0.0465833	0.394322	-4.60046	NO
Tpcn2	-1.00615	2.09154	-2.10302	0.0498391	0.400727	-4.60059	NO
Trappc11	-0.242865	5.56105	-2.42459	0.0261099	0.324857	-4.60193	NO
Lrp2	-0.715807	-1.09945	-1.88438	0.0758173	0.467607	-4.60367	NO
Cyren	0.307885	3.80054	2.30284	0.0334738	0.35055	-4.60609	NO
Nrtn	0.541876	5.10874	2.4035	0.0272664	0.330176	-4.6064	NO
Cflar	-0.336724	6.21223	-2.44029	0.0252791	0.321446	-4.60712	NO
Evi2	2.38219	-4.35103	1.75454	0.0963961	0.508822	-4.60771	NO
Mrps27	-0.241895	5.06687	-2.38999	0.0280316	0.333252	-4.60779	NO
Tppp3	1.10921	4.40674	2.37505	0.028902	0.334538	-4.60943	NO
Gm4131	-0.520886	-5.52381	-1.5946	0.128262	0.557524	-4.60966	NO
Riiad1	0.846097	-0.41901	1.97858	0.0634202	0.434947	-4.61043	NO
Ndufb2	0.309821	4.62125	2.38685	0.0282129	0.333286	-4.61253	NO
Rsrp1	0.865174	5.764	2.41227	0.0267794	0.327788	-4.61536	NO
Ndufa7	0.300731	4.81145	2.36821	0.0293087	0.336003	-4.61632	NO
Mrps21	0.267958	6.11951	2.44675	0.0249442	0.320694	-4.6164	NO
Fktn	-0.436654	4.84188	-2.38763	0.0281677	0.333286	-4.61667	NO
Gm8362	1.52339	-2.8597	1.80995	0.087082	0.490409	-4.61695	NO
Ms4a2	1.32949	-1.18455	1.91603	0.0714309	0.45585	-4.61696	NO
Rnf24	-0.500048	4.01272	-2.32069	0.0322855	0.345455	-4.6177	NO
Ubn1	0.300871	7.36147	2.44441	0.0250651	0.321446	-4.62078	NO
Slc12a5	-0.732355	-0.453688	-1.87021	0.0778566	0.471572	-4.62138	NO
Tmem245	-0.230267	6.55013	-2.43524	0.0255435	0.322097	-4.62191	NO
Thumpd3	0.379728	5.0408	2.4127	0.0267561	0.327788	-4.62239	NO
Ppfia4	-1.07862	-1.32032	-1.82338	0.0849477	0.485817	-4.62286	NO
Tsacc	0.511627	1.02311	2.04505	0.0557999	0.414875	-4.62292	NO
Zfp169	-0.639959	2.2449	-2.10968	0.049193	0.398964	-4.62476	NO
Phyhip	1.83411	1.17401	2.08189	0.051941	0.406229	-4.6283	NO
Slc26a8	-0.92245	-0.514335	-1.91172	0.0720152	0.456981	-4.62863	NO
Stau2	-0.506919	5.40209	-2.38475	0.0283341	0.333286	-4.6293	NO
Rps27	0.341493	8.07095	2.42731	0.0259641	0.324857	-4.63011	NO
Rel	0.414693	4.51322	2.32983	0.0316916	0.343099	-4.63013	NO
Gm49835	-0.749117	-5.16212	-1.63577	0.119305	0.543688	-4.63094	NO
Cuzd1	-0.749116	-5.15135	-1.63539	0.119385	0.543688	-4.63146	NO
Trip4	0.335128	5.3899	2.41534	0.0266113	0.326635	-4.63232	NO
Olfr633	-0.691332	-5.04342	-1.63081	0.120355	0.545308	-4.63292	NO
Trnt1	0.350554	5.34309	2.42054	0.0263283	0.325871	-4.6337	NO
Garnl3	-0.492789	2.65393	-2.18455	0.0424347	0.38158	-4.63408	NO
Gm8439	-1.67199	-4.62605	-1.64852	0.116643	0.539243	-4.63647	NO
Scamp1	-0.291962	5.98246	-2.3951	0.0277396	0.3322	-4.63812	NO
Ugt1a9	-0.559946	-5.19662	-1.61159	0.124499	0.549913	-4.63831	NO
Olfr1016	-1.2028	-4.53254	-1.65629	0.115043	0.538179	-4.63933	NO
Gm6882	-2.98179	-2.34874	-1.75013	0.0971731	0.510201	-4.63934	NO
Pgpep1l	-2.53606	-3.3703	-1.67483	0.111304	0.533619	-4.63948	NO
Reln	-2.30347	-2.2571	-1.73997	0.0989856	0.513027	-4.63993	NO
Ppp2r2d	0.337866	6.08913	2.39736	0.0276114	0.331749	-4.64021	NO
Spag16	0.999418	-4.22694	1.70763	0.104946	0.525656	-4.64071	NO
Mprip	0.245997	8.73382	2.44003	0.0252924	0.321446	-4.64093	NO
Dennd1b	-0.613005	3.31653	-2.17709	0.0430679	0.385419	-4.64229	NO
Usp34	-0.388121	6.99868	-2.44057	0.0252645	0.321446	-4.64424	NO
F2rl1	-0.577897	7.23113	-2.43795	0.0254011	0.321446	-4.64456	NO
Irf6	0.681806	7.65098	2.43307	0.0256581	0.322659	-4.64632	NO
Slx4	-0.856516	2.73322	-2.13642	0.0466741	0.394336	-4.64662	NO
Atad5	-0.876249	3.48333	-2.19794	0.0413192	0.378721	-4.64702	NO
Atf6	-0.325493	6.01058	-2.41062	0.0268704	0.328321	-4.648	NO
Tmem29	-1.1832	-3.37641	-1.68441	0.109415	0.531233	-4.64903	NO
Maneal	0.864034	0.223104	1.99233	0.0617717	0.430043	-4.64934	NO
Ccne2	0.314531	5.81001	2.42402	0.0261403	0.324857	-4.65124	NO
Slc25a34	1.62575	-2.72712	1.80123	0.0884945	0.492355	-4.65142	NO
Olfr1318	-0.563392	-5.42729	-1.56305	0.135503	0.566773	-4.65281	NO
Olfr789	1.13862	-4.15291	1.74463	0.0981509	0.511576	-4.65296	NO
Pbld2	0.63183	-0.963371	1.84681	0.081332	0.479871	-4.65559	NO
Mc1r	-0.734546	-0.136921	-1.88891	0.0751751	0.46699	-4.65595	NO
Zfp637	0.422417	5.12571	2.40297	0.0272959	0.330176	-4.65647	NO
Cul4a	-0.329199	6.18722	-2.40397	0.0272396	0.330176	-4.65744	NO
Slc25a53	-0.547696	-0.177851	-1.91429	0.0716666	0.45585	-4.65779	NO
Nutf2-ps1	0.339313	7.14789	2.4387	0.0253622	0.321446	-4.65876	NO
Eif2ak2	-0.556442	5.89794	-2.40645	0.0271016	0.329907	-4.65934	NO
Agpat4	0.837684	2.67599	2.2029	0.0409134	0.376638	-4.65984	NO
H2-M2	-1.08277	-2.96448	-1.73118	0.100575	0.515476	-4.66005	NO
Atl3	-0.453788	7.57149	-2.41828	0.0264509	0.32634	-4.66059	NO
Ildr2	0.801734	1.04351	2.03244	0.0571782	0.420062	-4.66079	NO
Rlbp1	-1.27226	-4.11405	-1.67391	0.111489	0.533629	-4.66084	NO
Mlf2	0.496275	8.44683	2.43584	0.0255119	0.322097	-4.66098	NO
Spire1	-0.741417	5.46021	-2.40707	0.0270669	0.32976	-4.66107	NO
Psca	1.35321	-3.81059	1.73796	0.0993461	0.513027	-4.6622	NO
Oit3	-0.982548	-4.34855	-1.62868	0.12081	0.545385	-4.66246	NO
Dsp	-0.308751	8.30468	-2.33841	0.0311438	0.34293	-4.6635	NO
Spta1	1.82453	-3.44439	1.76789	0.0940763	0.505138	-4.66413	NO
Cth	0.796396	1.21231	2.04659	0.0556329	0.41405	-4.66433	NO
Dnase1	-1.77181	-2.22515	-1.66734	0.112802	0.535778	-4.66467	NO
Cdc34	0.366459	5.66567	2.3925	0.0278881	0.333169	-4.66563	NO
Olfr183	1.03463	-3.54059	1.70105	0.106197	0.526888	-4.66593	NO
Eif4g1	-0.339994	8.26521	-2.43747	0.0254266	0.321446	-4.66598	NO
Olfr461	-0.560937	-0.920383	-1.82692	0.0843917	0.484322	-4.66659	NO
Zic2	-1.73464	-3.4523	-1.67257	0.111754	0.534382	-4.66665	NO
Pcmt1	0.218678	5.12328	2.35432	0.0301514	0.338413	-4.66736	NO
Spata21	1.39818	-4.16265	1.74335	0.0983793	0.512063	-4.66784	NO
Msn	-0.470772	10.1693	-2.42494	0.0260912	0.324857	-4.66864	NO
Fdxacb1	0.536416	3.06244	2.24405	0.037683	0.366794	-4.66936	NO
Pacs2	-0.354003	6.70592	-2.42328	0.0261804	0.324857	-4.66961	NO
Nfatc4	1.43209	4.42418	2.32199	0.0322002	0.345026	-4.66978	NO
Cfdp1	0.264434	7.49433	2.41618	0.0265651	0.32634	-4.67071	NO
Cmc2	0.391852	4.84325	2.37045	0.0291748	0.336003	-4.67397	NO
Vmn2r74	-0.893542	-1.99168	-1.80428	0.0879985	0.491925	-4.67432	NO
Serpina1b	-0.820774	-0.092659	-1.87313	0.0774334	0.470186	-4.67435	NO
Dguok	0.502943	4.45166	2.35239	0.0302697	0.339122	-4.6746	NO
Olfr1135	-0.819873	-4.07547	-1.62656	0.121261	0.54599	-4.67614	NO
Kcnc4	-1.08734	-1.8392	-1.72222	0.102219	0.519218	-4.67765	NO
Mtfmt	0.424967	3.6845	2.27258	0.0355828	0.357668	-4.67768	NO
Me2	-0.529976	5.30784	-2.38675	0.0282183	0.333286	-4.6783	NO
Noxo1	-0.518272	3.44613	-2.21815	0.0396875	0.374413	-4.67897	NO
Adgrb2	-1.48607	1.52794	-2.01724	0.0588812	0.423291	-4.67899	NO
Olfr115	-0.499623	-2.60104	-1.75729	0.0959142	0.508534	-4.67931	NO
Cntn3	-1.47273	-4.81201	-1.62773	0.121012	0.545606	-4.68003	NO
Gm42417	-3.32043	-2.04753	-1.72418	0.101858	0.518122	-4.68016	NO
Cuta	0.313557	5.41146	2.35104	0.0303534	0.339322	-4.68233	NO
Castor2	0.487047	4.8615	2.34068	0.0310001	0.342556	-4.6826	NO
Olfr575	0.526131	-0.27046	1.92732	0.0699213	0.451849	-4.6831	NO
Ccdc141	-0.403314	5.66436	-2.35372	0.030188	0.338463	-4.68446	NO
Zfp74	-0.437194	2.99453	-2.17298	0.04342	0.38632	-4.68456	NO
Aire	1.58251	-2.81593	1.80919	0.0872058	0.490582	-4.68542	NO
Fam13b	-0.386895	5.86138	-2.39429	0.0277862	0.332259	-4.68723	NO
Cysltr2	-1.21973	-3.09875	-1.69329	0.107688	0.528539	-4.68729	NO
Kctd8	-1.01984	-4.82616	-1.64277	0.117836	0.541204	-4.68854	NO
Hbegf	-0.567108	6.69201	-2.41343	0.0267161	0.327649	-4.6899	NO
Pon2	0.468295	6.25853	2.40605	0.0271236	0.329907	-4.69008	NO
Cadps2	0.429452	5.64068	2.37233	0.0290629	0.33553	-4.69147	NO
Ppp1r3d	0.599518	0.482376	1.91411	0.0716903	0.45585	-4.69209	NO
Phex	-0.529664	-0.0713075	-1.90785	0.0725429	0.458556	-4.69315	NO
Dpf1	-1.0478	-0.72823	-1.8426	0.0819717	0.480504	-4.69339	NO
Wfdc15a	1.48509	-4.10654	1.70091	0.106223	0.526888	-4.69387	NO
Gm4791	-0.645875	-0.465754	-1.86333	0.0788644	0.473748	-4.694	NO
C8b	1.53758	-4.95645	1.64409	0.117561	0.540913	-4.69451	NO
Ccdc158	0.530668	1.93141	2.04929	0.0553426	0.413348	-4.69462	NO
Osm	-1.03149	-0.116794	-1.88637	0.0755339	0.467607	-4.69532	NO
Lca5	0.518868	3.76499	2.2505	0.0371978	0.366794	-4.69534	NO
Cul7	-0.860279	2.30272	-2.03255	0.0571661	0.420062	-4.69567	NO
Smco2	-1.36968	-4.94835	-1.6213	0.12239	0.547143	-4.69589	NO
Atp5l	0.396446	6.03543	2.38406	0.0283742	0.333286	-4.69724	NO
Olfr695	0.561882	-1.23241	1.81176	0.0867917	0.489977	-4.69757	NO
Mybph	-1.87927	-0.401712	-1.79575	0.0893917	0.494517	-4.69763	NO
Itih4	1.52955	-2.97927	1.74825	0.0975059	0.510377	-4.69867	NO
Mrpl52	0.419356	6.06252	2.36449	0.0295321	0.336454	-4.69967	NO
Ssxb2	-1.75468	-4.88725	-1.60493	0.125962	0.552901	-4.70061	NO
Olfr1297	0.539316	-0.12322	1.85829	0.0796106	0.475417	-4.70116	NO
Adgrg2	-0.7344	2.37136	-2.02392	0.0581273	0.421752	-4.70235	NO
Ppan	0.411484	5.86845	2.36948	0.0292331	0.336003	-4.70314	NO
Kcnc1	-1.07262	-1.69038	-1.73421	0.100025	0.514416	-4.70358	NO
Uts2r	1.61973	1.88405	2.03874	0.0564855	0.417241	-4.70408	NO
Clptm1	-0.349687	6.15588	-2.38628	0.0282454	0.333286	-4.7066	NO
Morc4	-1.28289	5.14103	-2.33242	0.0315252	0.343099	-4.70717	NO
Copb1	-0.343266	6.75886	-2.40173	0.0273652	0.330667	-4.70748	NO
Cic	-0.284331	7.10148	-2.38295	0.0284386	0.333286	-4.70766	NO
Zic1	-0.845453	-1.64844	-1.79325	0.0898028	0.495409	-4.70767	NO
Gm10662	1.2593	-2.64498	1.7466	0.0978006	0.511099	-4.70773	NO
Gm5891	1.2593	-2.64498	1.7466	0.0978006	0.511099	-4.70773	NO
Dhrs2	1.62935	-4.48618	1.65321	0.115675	0.538179	-4.70821	NO
Zscan5b	-0.767377	-5.08821	-1.57629	0.132424	0.561242	-4.709	NO
Gm867	1.39256	-4.75515	1.66652	0.112968	0.535778	-4.71092	NO
Plekha4	-0.768855	4.53853	-2.29171	0.0342357	0.353876	-4.71152	NO
Ddo	0.878302	0.0448815	1.93124	0.0694047	0.450871	-4.71362	NO
Usp36	-0.344193	5.01375	-2.34684	0.0306145	0.340658	-4.71407	NO
Tac1	1.25961	-1.03048	1.85158	0.0806122	0.478817	-4.71407	NO
Xpot	-0.236235	5.80076	-2.3694	0.0292374	0.336003	-4.71488	NO
Clpx	0.368694	5.45994	2.3741	0.0289581	0.334844	-4.71536	NO
Hcst	0.631349	-1.63237	1.81341	0.0865284	0.489517	-4.71544	NO
Suclg2	0.618238	4.87034	2.3396	0.0310684	0.342866	-4.71588	NO
Bms1	0.331601	6.86297	2.40309	0.0272892	0.330176	-4.7174	NO
Mdh1b	-1.42592	-2.99085	-1.67192	0.111886	0.534469	-4.71747	NO
Slc39a7	0.230199	7.54429	2.363	0.0296221	0.336721	-4.71927	NO
Pde4d	0.544775	4.3705	2.31253	0.0328234	0.348038	-4.72002	NO
Dlgap4	0.272384	5.77178	2.31267	0.0328147	0.348038	-4.72075	NO
Tmem208	0.387628	4.73115	2.33525	0.0313443	0.343099	-4.72155	NO
Swsap1	0.406964	3.6385	2.20479	0.0407595	0.375924	-4.72281	NO
Krt9	-0.908979	-5.02914	-1.57058	0.133745	0.563928	-4.723	NO
Pkn3	0.429797	3.17811	2.20899	0.0404197	0.375616	-4.72346	NO
Vash2	0.783771	3.41853	2.23804	0.0381393	0.368851	-4.72452	NO
Dsc1	1.53898	-3.62847	1.69508	0.107342	0.528005	-4.72464	NO
Ccdc167	0.331964	4.71761	2.28931	0.0344023	0.354655	-4.72487	NO
Zfp534	-2.0907	-4.20742	-1.62595	0.121392	0.54599	-4.72519	NO
Olfr229	-1.12799	-4.57219	-1.61768	0.123174	0.547331	-4.72599	NO
Cpa1	-1.66536	-3.36936	-1.66463	0.113348	0.535778	-4.72754	NO
Gabarapl2	0.286328	5.87646	2.38022	0.0285983	0.33382	-4.72783	NO
Lingo1	-1.44972	0.400363	-1.90036	0.0735733	0.461271	-4.72801	NO
Olfr1490	-1.02484	-3.85259	-1.6067	0.125573	0.552175	-4.72832	NO
Ankrd35	0.710511	0.119863	1.88547	0.0756622	0.467607	-4.72841	NO
Mpzl1	-0.29765	7.41374	-2.37235	0.0290619	0.33553	-4.72902	NO
Nup153	-0.375496	6.81449	-2.40083	0.0274156	0.331005	-4.7296	NO
Ppp5c	-0.337217	5.53259	-2.36776	0.0293359	0.336035	-4.72991	NO
Sult5a1	0.51313	1.29002	2.00184	0.060654	0.426891	-4.73014	NO
Zfp623	0.272344	4.6287	2.3365	0.0312649	0.343099	-4.73024	NO
Olfr744	1.23838	-3.84134	1.68317	0.109657	0.531233	-4.73164	NO
Sybu	1.1993	0.010166	1.91755	0.0712264	0.455294	-4.73221	NO
Gm5475	0.680723	-4.51979	1.62548	0.121492	0.546268	-4.73239	NO
Myl7	1.51839	-1.27201	1.82467	0.0847452	0.485206	-4.73443	NO
Atad2	-0.636444	5.76323	-2.35474	0.0301252	0.338413	-4.73493	NO
Kbtbd2	0.457365	6.48146	2.38974	0.0280463	0.333252	-4.73509	NO
Ctnnal1	-0.469938	5.81157	-2.31784	0.0324725	0.346702	-4.73526	NO
Sdcbp2	0.861264	2.32988	2.08553	0.0515741	0.404861	-4.73644	NO
Bok	0.765902	5.12957	2.36226	0.029667	0.336972	-4.73674	NO
Lep	2.54282	-3.75368	1.68141	0.110004	0.531991	-4.73709	NO
Gli3	-0.526658	5.5392	-2.36692	0.0293863	0.336035	-4.73776	NO
Olfr523	-1.18584	-4.02823	-1.61374	0.124029	0.549387	-4.73798	NO
Tubb2a	-0.489626	6.76264	-2.38617	0.0282521	0.333286	-4.73835	NO
Arl10	-0.478949	2.89872	-2.1339	0.0469059	0.394876	-4.73958	NO
Ly6k	2.13575	1.05827	2.03759	0.056612	0.417757	-4.73983	NO
Ntan1	-0.329768	5.07314	-2.33093	0.0316209	0.343099	-4.74038	NO
Cabcoco1	1.56153	-4.44723	1.65357	0.1156	0.538179	-4.74149	NO
Tmem116	-0.537737	0.791342	-1.93239	0.0692536	0.450493	-4.74236	NO
Myo15	0.673664	0.0329992	1.86626	0.0784337	0.472908	-4.7429	NO
Nudt7	0.401801	2.82396	2.1402	0.0463274	0.394032	-4.74357	NO
Sypl2	1.2329	-0.937275	1.7717	0.0934234	0.503647	-4.74509	NO
Abra	-0.863093	-1.1231	-1.72303	0.10207	0.518816	-4.74687	NO
Flvcr1	-0.46187	3.22521	-2.10842	0.0493149	0.399258	-4.74697	NO
Gm266	-1.69735	-1.00116	-1.81044	0.0870035	0.490409	-4.74702	NO
Tcstv1	-0.99873	-5.19014	-1.55903	0.136451	0.568038	-4.7483	NO
Tdrd12	-1.39446	-4.57326	-1.59613	0.127918	0.557019	-4.7483	NO
AI593442	0.826466	-3.49589	1.61041	0.124756	0.550717	-4.7487	NO
Ubr1	-0.379217	4.61197	-2.30149	0.0335654	0.35101	-4.74938	NO
Wdr13	-0.317283	6.1727	-2.37683	0.0287968	0.334025	-4.7495	NO
Degs2	-1.17144	-1.88414	-1.74883	0.0974034	0.510201	-4.74956	NO
Tmem107	0.35263	4.67468	2.32815	0.0317999	0.343099	-4.74985	NO
Mdga2	-1.73819	-4.09343	-1.59743	0.127628	0.556571	-4.75038	NO
Mettl7a1	0.956043	1.71031	2.063	0.0538882	0.410469	-4.75118	NO
Pcdhgc5	-0.659706	1.57511	-1.97399	0.0639796	0.436288	-4.75165	NO
Hapln4	0.69562	-1.26926	1.80334	0.0881507	0.491925	-4.75215	NO
Cep72	-0.428125	3.05505	-2.13064	0.0472077	0.39544	-4.75255	NO
Usp20	0.348746	5.03765	2.28869	0.0344452	0.354685	-4.7526	NO
Cpa3	1.43117	-4.24783	1.65007	0.116321	0.538478	-4.75308	NO
Olfr472	0.629234	2.12335	2.09525	0.0506034	0.401861	-4.7531	NO
Tspyl2	-0.377495	4.75833	-2.2491	0.0373029	0.366794	-4.75393	NO
Sema3e	-0.827483	2.73702	-2.0826	0.0518691	0.406097	-4.75541	NO
Espn	-0.362973	5.31135	-2.32756	0.031838	0.343153	-4.7561	NO
Fam172a	-0.368462	4.87753	-2.32199	0.0322002	0.345026	-4.75632	NO
Hdac11	0.738484	3.96167	2.25079	0.0371768	0.366794	-4.75675	NO
Spink4	0.712565	-5.22008	1.48502	0.154892	0.590078	-4.75734	NO
Gm5105	0.959748	-4.25757	1.55316	0.137842	0.569334	-4.7579	NO
Zfp804b	0.839649	-4.51477	1.59613	0.127919	0.557019	-4.75853	NO
Psmb11	-0.437761	0.595962	-1.90784	0.0725441	0.458556	-4.75941	NO
Angpt4	-0.837845	-1.0827	-1.78181	0.0917092	0.49896	-4.76036	NO
Dennd1c	0.581055	1.49357	1.97514	0.0638393	0.436288	-4.76049	NO
Uba52	0.400807	8.10475	2.38095	0.0285553	0.333589	-4.76194	NO
Dok3	0.363142	2.93772	2.11311	0.0488627	0.398946	-4.76242	NO
Pdzrn4	-0.940979	-5.27355	-1.53903	0.141243	0.572175	-4.76265	NO
Pcdh17	-1.53977	-0.535063	-1.78374	0.0913863	0.498673	-4.7627	NO
Perp	1.12306	8.39528	2.37834	0.0287082	0.334025	-4.76276	NO
Lurap1	-0.306097	4.31772	-2.27536	0.0353843	0.357201	-4.76498	NO
Cyp2j13	0.662382	-0.539943	1.84751	0.0812268	0.479871	-4.7671	NO
Nphs1	-1.02459	-4.99133	-1.5395	0.141128	0.572175	-4.7691	NO
Mus81	-0.837687	3.25845	-2.13964	0.0463787	0.394032	-4.77009	NO
Meiob	1.16021	-3.49602	1.68002	0.110277	0.532462	-4.77027	NO
Wls	0.545533	6.57736	2.36863	0.0292838	0.336003	-4.77061	NO
Ablim3	1.15882	0.51063	1.93614	0.0687622	0.448869	-4.77077	NO
Sptbn1	-0.506197	7.88271	-2.38365	0.0283983	0.333286	-4.77287	NO
Slamf8	-1.12311	-0.0339448	-1.81943	0.085571	0.487833	-4.77299	NO
Cmtr2	0.195031	4.03768	2.21585	0.0398701	0.374743	-4.7739	NO
Tbx3	2.6774	3.40057	2.2357	0.0383186	0.368851	-4.77453	NO
Nemp2	-0.850018	2.989	-2.10709	0.0494435	0.399389	-4.77575	NO
Mrps33	0.441733	5.29835	2.3513	0.0303376	0.339322	-4.77599	NO
Uba3	0.330238	6.58735	2.36377	0.0295759	0.336454	-4.77677	NO
Shox2	2.08851	5.5992	2.32358	0.0320965	0.344933	-4.77677	NO
Gpha2	-1.03904	-4.68076	-1.55945	0.13635	0.567914	-4.77815	NO
Mn1	0.985591	3.90618	2.22048	0.0395031	0.374413	-4.77841	NO
Snap25	1.07611	-4.72227	1.59297	0.128627	0.557524	-4.77882	NO
Ccl17	-0.958928	-0.694629	-1.80138	0.0884692	0.492355	-4.77902	NO
Amigo2	0.548348	2.25676	2.02939	0.0575167	0.420062	-4.77908	NO
Cyp24a1	-0.933069	-5.2794	-1.52152	0.145555	0.576365	-4.77911	NO
Meis3	-0.611646	0.408788	-1.63382	0.119716	0.54442	-4.77914	NO
Tmem151b	1.4198	2.68893	2.15415	0.045069	0.390087	-4.77938	NO
Cyp4f39	1.5848	-3.19642	1.66356	0.113564	0.535934	-4.78168	NO
Aqp11	0.754181	-0.464706	1.86403	0.0787617	0.473748	-4.78269	NO
Stk11	0.248169	6.9601	2.32828	0.0317914	0.343099	-4.78339	NO
Pde10a	-1.9129	-3.41947	-1.56712	0.134551	0.565389	-4.78348	NO
Trim31	-0.532782	-5.28205	-1.45936	0.16175	0.598947	-4.78412	NO
Stt3a	0.34904	7.78147	2.36824	0.0293068	0.336003	-4.78464	NO
BC053393	-0.41266	-1.00851	-1.77079	0.0935798	0.503994	-4.78523	NO
Olfr658	-0.952116	-3.31152	-1.65123	0.116083	0.538478	-4.78555	NO
Uox	1.26684	-1.25945	1.72944	0.100894	0.515735	-4.78607	NO
Prom2	-0.38073	6.51546	-2.34777	0.0305564	0.340269	-4.78672	NO
Ifrd2	0.378634	5.31552	2.33856	0.0311344	0.34293	-4.78807	NO
Gpr1	1.5268	-3.68447	1.66767	0.112736	0.535776	-4.7892	NO
Smim15	-0.288464	5.48627	-2.33142	0.0315897	0.343099	-4.7899	NO
Gm10271	-0.927327	-2.96643	-1.61928	0.122827	0.547143	-4.79035	NO
Cst10	-1.52092	-3.08497	-1.53195	0.142973	0.572745	-4.79044	NO
Topaz1	-0.638464	-5.02463	-1.47362	0.157908	0.593378	-4.79072	NO
Vav2	-0.327724	5.49795	-2.33149	0.031585	0.343099	-4.79121	NO
Adap1	-0.840807	1.36849	-1.95373	0.0665013	0.442873	-4.79146	NO
Vmn2r20	2.66488	-3.09723	1.76801	0.0940563	0.505138	-4.79191	NO
Cyb5d1	-0.554938	2.24747	-2.02369	0.058153	0.421752	-4.79222	NO
Kif6	2.3292	-0.664397	1.85814	0.079633	0.475417	-4.79252	NO
[truncated: 12,767 more rows]

## Sheet: Table S2_BSp_Ctrl DEGs
Genes	LogFC	AveExpr	t	P.Value	Adj.P.Val	B	Significant
Exosc6	8.0534	-4.32903	27.4054	4.26582e-16	6.29891e-12	16.0733	Upregulated		Sv40 mouse model
Ucp1	7.64127	-2.39767	6.86844	2.03363e-06	0.0021449	5.14424	Upregulated		Genes	LogFC	AveExpr	t	P.Value	Adj.P.Val	B	Significant
Stag3	6.36794	-0.175329	5.36878	4.25168e-05	0.0149477	2.21534	Upregulated		Ubl5	0.724208	6.42859	4.74086	0.000164443	0.0337334	0.332521	Upregulated
Mtmr11	5.45924	-2.6325	5.32571	4.65888e-05	0.0152873	2.09588	Upregulated		Med12	-0.979295	5.7532	-5.68202	2.2003e-05	0.010153	2.44547	Downregulated
Thrsp	5.21799	0.480938	4.5097	0.000273009	0.0466192	0.337462	Upregulated		Rpap1	-0.800207	5.02663	-3.90146	0.0010511	0.0928651	-1.33196	Downregulated
Slc26a10	4.77682	-2.32934	7.60395	5.10988e-07	0.00107789	6.22464	Upregulated
S100g	4.66273	-0.810096	3.96404	0.00091447	0.0865581	-0.597239	Upregulated
Ces1f	4.57991	-4.16066	4.70054	0.000179592	0.0358358	0.922635	Upregulated
Elovl3	4.44535	-4.23159	5.78256	1.78547e-05	0.00878808	2.9519	Upregulated
Mrap	4.34036	-3.0273	5.71375	2.05964e-05	0.00981051	2.88762	Upregulated		Her2/neu mouse model
Fabp3	3.89895	0.310646	5.5865	2.68647e-05	0.0116672	2.68328	Upregulated		Genes	LogFC	AveExpr	t	P.Value	Adj.P.Val	B	Significant
Rgs7	3.85961	-4.3706	3.96819	0.000906071	0.0863164	-0.520833	Upregulated		Med12	0.464876	5.59456	5.28933	4.77987e-05	0.0331778	2.15824	Upregulated
Tmem202	3.84514	-4.92151	7.02683	1.50108e-06	0.00189272	4.87997	Upregulated		Ubl5	-0.641493	6.14946	-6.08535	8.9531e-06	0.0331778	3.70295	Downregulated
Adrb3	3.77705	-2.04808	4.84697	0.000130492	0.0310782	1.23936	Upregulated		Rpap1	0.479097	6.09328	4.02243	0.000781227	0.0879666	-0.429335	Upregulated
Slc24a3	3.66525	-4.76373	10.3789	5.18005e-09	3.82443e-05	7.98028	Upregulated
Agr3	3.60025	-4.38658	6.53516	3.89558e-06	0.00319568	4.18526	Upregulated
Gpa33	3.56669	-0.27768	5.89463	1.41666e-05	0.00804555	3.32024	Upregulated
Plin1	3.47545	0.315244	9.50273	2.00016e-08	7.3836e-05	9.39027	Upregulated
Dsc3	3.46124	3.50591	4.75024	0.000161111	0.0337334	0.719149	Upregulated
Loxhd1	3.42146	-3.77985	4.02261	0.000802773	0.0842278	-0.427063	Upregulated
Slc27a2	3.38469	-4.60588	4.77603	0.000152294	0.0337334	0.991765	Upregulated
Bpifb1	3.3623	-2.5876	3.97305	0.000896321	0.085942	-0.534539	Upregulated
Cox4i2	3.31132	2.3352	4.29134	0.000442157	0.0610177	-0.308948	Upregulated
Trpa1	3.24898	-3.51036	4.16453	0.000585683	0.0727497	-0.131858	Upregulated
Gm49340	3.14822	-4.91064	9.65552	1.57066e-08	7.3836e-05	8.68882	Upregulated
Fabp4	2.92667	4.33634	5.21894	5.84987e-05	0.0172758	1.52139	Upregulated
Capn8	2.90466	-4.04778	4.00569	0.00083356	0.0843037	-0.447827	Upregulated
Cidea	2.86369	1.68262	9.0048	4.48109e-08	0.000132336	8.86984	Upregulated
Gm3526	2.77502	-5.0736	6.77214	2.45006e-06	0.00231697	4.09741	Upregulated
Fbxw10	2.72414	-4.8207	4.60599	0.000220931	0.0412946	0.672008	Upregulated
Pcdha5	2.72166	-4.70902	3.89646	0.00106286	0.0928651	-0.675403	Upregulated
Spata22	2.66091	-4.36343	6.11233	9.07963e-06	0.00536279	3.05131	Upregulated
Cntd1	2.66075	0.0276675	4.11341	0.000656073	0.0781256	-0.382679	Upregulated
Aspa	2.55004	1.89664	4.0433	0.000766688	0.0839052	-0.701875	Upregulated
Gm9833	2.48205	-5.09708	6.22288	7.26085e-06	0.00446724	3.17214	Upregulated
Kcnk3	2.46804	-0.655531	5.01871	8.99436e-05	0.0233001	1.58413	Upregulated
Sec14l4	2.4065	-1.60219	4.10391	0.00067007	0.0788718	-0.262901	Upregulated
Samd13	2.39759	-2.30277	4.03295	0.000784535	0.0839452	-0.407939	Upregulated
Ntng1	2.35379	3.45824	4.3371	0.000399576	0.0561918	-0.234371	Upregulated
Kcnq5	2.34903	0.0451049	3.80747	0.00129563	0.099521	-0.941717	Upregulated
Olig1	2.32967	-5.224	6.41406	4.95184e-06	0.00365594	3.74266	Upregulated
Gm28778	2.29459	-5.29584	7.14432	1.20101e-06	0.00189272	4.66137	Upregulated
Tas2r143	2.24627	-4.61142	4.19704	0.000544922	0.0707224	-0.0694229	Upregulated
Gm136	2.24305	-4.87701	5.17637	6.40786e-05	0.0185526	1.82779	Upregulated
Grm6	2.21739	-4.22787	6.2734	6.55932e-06	0.0044025	3.7205	Upregulated
Adig	2.20232	-0.736651	4.09555	0.000682636	0.0793685	-0.344215	Upregulated
Fam81a	2.14852	2.10816	6.74923	2.56151e-06	0.00231697	4.90458	Upregulated
Aldh1l1	2.14655	0.259023	4.22888	0.000507778	0.066945	-0.134061	Upregulated
Dgat2	2.0641	2.19558	7.1651	1.15478e-06	0.00189272	5.70436	Upregulated
Crisp4	2.06246	-4.83675	6.93324	1.79535e-06	0.00203924	4.87377	Upregulated
Gm10718	2.05437	-5.01037	5.04194	8.55455e-05	0.0226168	1.43971	Upregulated
Otc	1.97687	-5.19598	5.44131	3.64649e-05	0.0149477	2.1135	Upregulated
Armc3	1.97117	-3.70852	4.03952	0.000773154	0.0839052	-0.378618	Upregulated
Lrrc66	1.93679	-0.657788	4.19614	0.000546008	0.0707224	-0.0904711	Upregulated
Pdk4	1.90879	2.85867	4.38813	0.000356948	0.0532393	-0.0289525	Upregulated
Nat8l	1.87355	-0.353154	3.945	0.000954039	0.0895971	-0.684205	Upregulated
Rspo2	1.83757	-5.08556	4.37614	0.000366534	0.0535865	0.207201	Upregulated
Slc4a8	1.82342	3.40287	4.94707	0.000105011	0.0262812	1.08136	Upregulated
Pate10	1.80915	-5.32265	4.39141	0.000354376	0.0532393	0.184609	Upregulated
Pianp	1.80158	5.94595	4.62386	0.000212439	0.0412746	0.0669254	Upregulated
Mapk15	1.76872	2.05364	4.85157	0.000129193	0.0310782	0.945856	Upregulated
Pitx3	1.73522	-3.98485	3.80569	0.0013008	0.099521	-0.84089	Upregulated
Cers1	1.72508	0.235716	4.68818	0.000184516	0.0363275	0.860269	Upregulated
Slc2a5	1.71038	-1.51817	4.30776	0.000426368	0.0593939	0.135958	Upregulated
Zglp1	1.70844	-0.343819	3.91142	0.00102806	0.0928651	-0.784353	Upregulated
Foxf2	1.70412	2.73549	4.16029	0.000591221	0.0727497	-0.546468	Upregulated
Cox7a1	1.70329	1.0697	5.10388	7.48652e-05	0.0208577	1.66732	Upregulated
Lin28a	1.66945	-4.81121	4.05382	0.000748968	0.0831523	-0.355753	Upregulated
Iqcf1	1.66004	-5.25148	4.60828	0.000219824	0.0412946	0.637589	Upregulated
Lctl	1.65615	-0.408311	5.8154	1.66817e-05	0.00878808	3.16579	Upregulated
Rnf148	1.60646	-2.49747	4.26104	0.00047284	0.0634724	0.0621295	Upregulated
Msc	1.58603	1.77293	4.8816	0.000121031	0.0297857	1.08475	Upregulated
Cd300e	1.54637	-3.15825	4.74173	0.000164132	0.0337334	1.0107	Upregulated
Pax4	1.53505	-5.1984	5.38837	4.07873e-05	0.0149477	2.063	Upregulated
Fat2	1.51298	4.03783	5.32649	4.65115e-05	0.0152873	1.80427	Upregulated
Slc35f2	1.49583	-0.453324	4.0788	0.00070852	0.0806475	-0.404033	Upregulated
Tmem232	1.45464	-5.02744	5.40195	3.96302e-05	0.0149477	2.17717	Upregulated
Cfap46	1.41089	-4.24243	4.12024	0.000646203	0.0778249	-0.233491	Upregulated
Cdk6	1.36083	6.08252	4.53204	0.000259911	0.0462187	-0.113287	Upregulated
Bdkrb2	1.3546	4.3737	3.97359	0.00089526	0.085942	-1.18172	Upregulated
AU018091	1.30977	3.49098	5.27338	5.20797e-05	0.016021	1.7657	Upregulated
Osbp2	1.2264	1.8591	3.89726	0.00106096	0.0928651	-1.03725	Upregulated
Rpl39l	1.22206	-1.77323	3.8647	0.0011407	0.0957018	-0.745912	Upregulated
Spag4	1.14294	0.035584	4.042	0.0007689	0.0839052	-0.520871	Upregulated
Tnnt2	1.13778	5.98156	5.25285	5.44108e-05	0.0163965	1.45004	Upregulated
Parp6	1.09831	3.21158	7.01404	1.53817e-06	0.00189272	5.30885	Upregulated
Tspyl3	1.07145	2.4007	5.65482	2.32874e-05	0.0104201	2.72649	Upregulated
Tm6sf2	1.06769	0.935783	4.36974	0.000371752	0.0538165	0.100206	Upregulated
Acsbg1	1.04417	5.50793	3.90089	0.00105244	0.0928651	-1.46238	Upregulated
Trpv6	0.898066	6.93259	5.41573	3.84909e-05	0.0149477	1.81815	Upregulated
Tlr2	0.817873	5.47928	7.77433	3.74939e-07	0.000922726	6.60434	Upregulated
Cln8	0.799917	5.02582	4.75308	0.000160114	0.0337334	0.452189	Upregulated
Rbm7	0.759021	5.2526	4.83261	0.000134631	0.031555	0.585569	Upregulated
Cd72	0.745525	4.28305	4.18393	0.00056101	0.0718038	-0.766632	Upregulated
Msantd2	0.734805	4.28476	4.74074	0.000164487	0.0337334	0.462978	Upregulated
Gm7324	0.730937	2.8509	4.6151	0.000216561	0.0412946	0.394486	Upregulated
Gadd45g	0.72628	4.60827	5.04071	8.57742e-05	0.0226168	1.14345	Upregulated
Ubl5	0.724208	6.42859	4.74086	0.000164443	0.0337334	0.332521	Upregulated
Ankle1	0.709297	2.83253	4.26415	0.000469594	0.0634724	-0.314592	Upregulated
Chordc1	0.686713	5.97872	4.80294	0.000143616	0.0326252	0.485142	Upregulated
Atp6v1e1	0.665039	7.11899	3.8937	0.00106941	0.0928874	-1.57912	Upregulated
Afg1l	0.653331	3.1861	4.51204	0.000271605	0.0466192	0.203354	Upregulated
Slc16a3	0.643386	7.28739	3.88832	0.00108227	0.092912	-1.59827	Upregulated
Trim2	0.623924	6.3095	5.13734	6.96722e-05	0.0197842	1.29181	Upregulated
Mrpl53	0.591717	5.16117	3.97595	0.000890554	0.085942	-1.30758	Upregulated
Rab11a	0.58878	6.54454	3.86538	0.00113898	0.0957018	-1.55036	Upregulated
Fam118b	0.572009	4.43192	4.09165	0.000688567	0.0794326	-1.00146	Upregulated
Tmem243	0.54223	4.38846	3.99741	0.00084906	0.0847109	-1.22135	Upregulated
Foxn3	0.538775	6.09028	4.49192	0.000283907	0.0466192	-0.168586	Upregulated
Arglu1	0.533144	5.41448	3.97426	0.000893924	0.085942	-1.33258	Upregulated
Wtip	0.531482	5.75058	4.72219	0.000171289	0.0346473	0.306941	Upregulated
Suclg1	0.467293	5.70805	4.16324	0.000587367	0.0727497	-0.901124	Upregulated
Msantd4	0.460768	5.78796	4.40642	0.000342823	0.0527305	-0.38775	Upregulated
Srprb	0.437104	5.97137	3.86538	0.00113898	0.0957018	-1.57735	Upregulated
Emg1	0.435715	6.47582	3.82548	0.00124473	0.0982875	-1.72795	Upregulated
Zbtb44	0.395933	6.23464	3.83023	0.00123166	0.0980018	-1.58481	Upregulated
Decr1	0.392555	5.19414	4.0155	0.000815582	0.0842278	-1.19343	Upregulated
Slc37a3	0.364107	6.24211	3.81652	0.0012698	0.0992058	-1.69557	Upregulated
Ccdc6	0.328522	6.70772	3.92269	0.00100259	0.0919523	-1.45291	Upregulated
Trim8	-0.307449	6.7811	-3.94281	0.000958712	0.0895971	-1.46019	Downregulated
Fam199x	-0.350628	5.25027	-3.8292	0.00123448	0.0980018	-1.60761	Downregulated
Exoc2	-0.437239	4.98611	-4.01312	0.000819895	0.0842278	-1.2045	Downregulated
Upf3b	-0.43729	5.8471	-4.39267	0.00035339	0.0532393	-0.376441	Downregulated
Zfp865	-0.469709	3.90512	-3.80681	0.00129754	0.099521	-1.45047	Downregulated
Agtrap	-0.487281	6.14038	-4.18014	0.000565737	0.0718038	-0.921495	Downregulated
Rps6ka3	-0.503516	7.10482	-4.23849	0.000497067	0.0661233	-0.815191	Downregulated
Ttc37	-0.551673	4.67672	-3.93223	0.000981543	0.0905842	-1.29924	Downregulated
Med14	-0.563239	7.05563	-4.56113	0.000243808	0.0450008	0.0612033	Downregulated
Zfp36l2	-0.577692	8.06392	-4.53685	0.000257176	0.0462187	-0.0647647	Downregulated
Spns2	-0.585741	6.26699	-4.01415	0.000818022	0.0842278	-1.26151	Downregulated
Ammecr1	-0.611783	6.14216	-5.41591	3.8477e-05	0.0149477	1.81644	Downregulated
Hmgn5	-0.615904	6.1108	-3.97808	0.000886359	0.085942	-1.27221	Downregulated
Zzef1	-0.616233	4.22687	-3.83229	0.00122602	0.0980018	-1.3969	Downregulated
Ahnak	-0.625252	10.3397	-3.83627	0.00121521	0.0980018	-1.64979	Downregulated
Fkbp15	-0.648005	4.68975	-4.07785	0.000710021	0.0806475	-1.00697	Downregulated
Atrx	-0.675934	7.9909	-4.48246	0.000289886	0.0470381	-0.225172	Downregulated
Oga	-0.700023	6.56254	-4.33927	0.000397659	0.0561918	-0.524514	Downregulated
Snx29	-0.717433	2.06526	-3.86777	0.00113292	0.0957018	-1.00086	Downregulated
Coro2a	-0.744914	5.49627	-3.89977	0.00105506	0.0928651	-1.45236	Downregulated
Kif13a	-0.750351	5.09168	-4.42505	0.000329007	0.0511381	-0.290783	Downregulated
Plekhg5	-0.754432	5.87545	-3.86055	0.00115127	0.0960436	-1.61661	Downregulated
Slc26a2	-0.772162	5.86022	-4.75195	0.000160509	0.0337334	0.406598	Downregulated
Glis2	-0.781061	6.29734	-4.5268	0.000262927	0.0462187	-0.164059	Downregulated
Tanc2	-0.782881	6.92035	-4.06533	0.000730055	0.0822113	-1.1878	Downregulated
Rpap1	-0.800207	5.02663	-3.90146	0.0010511	0.0928651	-1.33196	Downregulated
Deptor	-0.81961	4.26725	-3.84949	0.00117997	0.097338	-1.43907	Downregulated
Ampd3	-0.831995	3.72554	-3.90163	0.00105071	0.0928651	-1.11905	Downregulated
Ankhd1	-0.87424	6.27268	-3.93818	0.00096862	0.0899538	-1.466	Downregulated
Rbm41	-0.877137	3.62756	-4.1188	0.000648277	0.0778249	-0.643278	Downregulated
Uckl1	-0.895889	2.31354	-3.85228	0.00117266	0.097278	-1.09515	Downregulated
Vps13d	-0.896645	4.29688	-4.0123	0.000821401	0.0842278	-1.06254	Downregulated
Taf1	-0.905388	5.05883	-3.99969	0.000844749	0.0847109	-1.14937	Downregulated
Plaur	-0.906827	4.34612	-4.10193	0.000673023	0.0788718	-0.85442	Downregulated
Esyt2	-0.927172	5.1899	-4.06234	0.000734925	0.0822113	-1.07486	Downregulated
Cdipt	-0.96352	3.05985	-4.1776	0.000568945	0.0718038	-0.46745	Downregulated
Med12	-0.979295	5.7532	-5.68202	2.2003e-05	0.010153	2.44547	Downregulated
Fam160b1	-1.02694	3.4095	-4.01237	0.000821264	0.0842278	-0.751857	Downregulated
Il34	-1.06782	3.08122	-4.34081	0.000396307	0.0561918	-0.133032	Downregulated
Tnni3	-1.11366	2.38708	-4.14687	0.000609094	0.0743296	-0.300245	Downregulated
Obox1	-1.15967	-5.35416	-3.83338	0.00122304	0.0980018	-0.834755	Downregulated
C1ql1	-1.21751	1.0378	-3.91621	0.00101716	0.0927119	-0.805029	Downregulated
Pgf	-1.26535	5.67691	-3.83992	0.00120537	0.0980018	-1.58376	Downregulated
Arhgap6	-1.37786	3.65953	-4.46597	0.000300614	0.0477297	0.0833983	Downregulated
Zfp993	-1.42636	-0.311261	-4.53421	0.000258677	0.0462187	0.603311	Downregulated
Pde6a	-1.46779	0.21247	-3.89095	0.00107597	0.0929109	-0.820374	Downregulated
Gm12689	-1.48797	-1.94009	-3.99074	0.000861748	0.0853998	-0.479086	Downregulated
Fstl4	-1.4912	-3.01087	-3.82307	0.00125145	0.0982917	-0.806378	Downregulated
Bend5	-1.51296	3.21506	-6.24571	6.93476e-06	0.00445212	3.87357	Downregulated
Cyp3a13	-1.53885	-3.25351	-4.49154	0.000284148	0.0466192	0.504999	Downregulated
Shisa3	-1.63931	-2.83267	-4.03644	0.000778478	0.0839052	-0.38468	Downregulated
Lca5l	-1.64321	-0.644591	-4.00582	0.000833317	0.0843037	-0.495917	Downregulated
Mfsd13a	-1.65892	2.58551	-4.3812	0.000362456	0.0535202	0.00914276	Downregulated
Cmtm5	-1.84469	-5.32905	-5.78647	1.77108e-05	0.00878808	2.46477	Downregulated
Fam189a1	-1.8643	-5.16601	-5.35382	4.3888e-05	0.0150709	1.78049	Downregulated
Nrsn1	-1.88984	-5.17643	-4.49326	0.000283075	0.0466192	0.375071	Downregulated
Fndc9	-2.00591	-3.26297	-4.44159	0.000317218	0.0498302	0.415975	Downregulated
Crhr2	-2.09866	-3.52004	-5.05094	8.39016e-05	0.0226168	1.49191	Downregulated
Slfnl1	-2.14457	-4.37887	-5.27765	5.16077e-05	0.016021	1.80566	Downregulated
Aff2	-2.33899	-0.36038	-4.97291	9.93002e-05	0.0252805	1.4915	Downregulated
Ccr8	-2.44976	-4.76657	-5.29489	4.97467e-05	0.0159687	1.90804	Downregulated
Lamp5	-2.49173	-5.11484	-6.72839	2.66751e-06	0.00231697	4.25855	Downregulated
Gpr63	-2.49747	-2.09254	-5.40766	3.91544e-05	0.0149477	2.28553	Downregulated
Slc5a1	-2.86655	1.3894	-5.85819	1.52708e-05	0.00835143	3.24445	Downregulated
Hoxc11	-2.88047	-5.05582	-4.49901	0.000279509	0.0466192	0.462706	Downregulated
Epb42	-3.01252	-3.43742	-4.27404	0.000459418	0.0628126	0.0688444	Downregulated
Yipf7	-3.04333	-2.54785	-3.83535	0.00121771	0.0980018	-0.784019	Downregulated
Asic1	-3.06065	-4.15953	-4.47182	0.000296763	0.0476305	0.432656	Downregulated
Myh6	-3.29286	-2.20804	-6.35186	5.60557e-06	0.00394151	3.96058	Downregulated
Art4	-3.34957	-2.30705	-3.81403	0.00127686	0.099232	-0.823911	Downregulated
Gm2026	-4.65398	-2.44754	-4.81629	0.000139502	0.0321858	1.13905	Downregulated
Adamts6	-5.01142	-1.30191	-5.37214	4.2215e-05	0.0149477	2.16834	Downregulated
Xntrpc	-5.8766	-0.887738	-7.07918	1.35877e-06	0.00189272	5.10587	Downregulated
Adck5	-7.4284	-1.05041	-6.44715	4.6367e-06	0.00360345	4.06402	Downregulated

## Sheet: Table S3_GTPs_Ctrl Transcripts
Genes	LogFC	AveExpr	t	P.Value	Adj.P.Val	B	Significant
Trim2	0.74369	6.3095	7.61749	4.98499e-07	0.00147217	6.43774	YES
Mtmr11	6.57181	-2.6325	8.27173	1.55216e-07	0.000763971	6.24399	YES
Spata22	2.65039	-4.36343	8.67106	7.82383e-08	0.000589786	5.94984	YES
Gm5796	-2.84903	-4.94247	-8.65875	7.98843e-08	0.000589786	5.41892	YES
Cfap46	2.26832	-4.24243	7.72633	4.08946e-07	0.00147217	4.88441	YES
Dio1	2.18561	-4.72078	6.69635	2.83937e-06	0.0069877	3.5883	YES
Egln3	-1.20701	6.43282	-6.09937	9.32178e-06	0.0152939	3.47231	YES
Slc26a10	4.00153	-2.32934	6.17528	7.99299e-06	0.0152939	3.12379	YES
Ntng1	2.75135	3.45824	5.7906	1.75599e-05	0.0199167	3.05826	YES
Sec14l4	2.76591	-1.60219	5.85394	1.54055e-05	0.0199167	2.97939	YES
Kcnq5	3.00036	0.0451049	5.75554	1.88835e-05	0.0199167	2.93702	YES
Ccr8	-2.19574	-4.76657	-6.1163	9.00678e-06	0.0152939	2.89846	YES
Asic1	-3.10836	-4.15953	-5.84904	1.5562e-05	0.0199167	2.59042	YES
Fat2	1.49758	4.03783	5.40213	3.96155e-05	0.0289585	2.24594	YES
Bend5	-1.13259	3.21506	-5.35363	4.3906e-05	0.0294689	2.20138	YES
Add3	0.378847	6.91007	5.48251	3.34277e-05	0.0265861	2.19311	YES
Armc3	2.38357	-3.70852	5.47155	3.42095e-05	0.0265861	1.98794	YES
Pitx3	2.24993	-3.98485	5.51503	3.12147e-05	0.0265861	1.97276	YES
Slc39a4	1.67792	2.94188	5.19488	6.15883e-05	0.0363765	1.87782	YES
Prol1	3.3453	-4.45237	5.77736	1.8048e-05	0.0199167	1.86824	YES
Lamp5	-1.70001	-5.11484	-5.51787	3.10292e-05	0.0265861	1.83095	YES
Kel	1.49882	-4.95866	5.55465	2.87205e-05	0.0265861	1.76168	YES
Crisp1	2.68087	-3.79689	5.29277	4.99714e-05	0.0320817	1.68224	YES
Tbx18	1.07666	4.14971	5.13355	7.02422e-05	0.0370427	1.62327	YES
Cadps2	0.775193	5.64068	5.19508	6.15618e-05	0.0363765	1.5746	YES
Nrsn1	-1.78886	-5.17643	-5.3838	4.11844e-05	0.0289585	1.5223	YES
Gm49835	1.83426	-5.16212	5.17611	6.4114e-05	0.0364118	1.43562	YES
Olfr633	1.83194	-5.04342	5.14637	6.83358e-05	0.0370427	1.22922	YES
Tcaf2	0.916536	4.62364	4.90523	0.00011498	0.056593	1.01991	YES
Trpm3	-0.825378	1.73392	-4.73228	0.000167555	0.0749734	0.985768	YES
Npffr1	-0.935797	0.214336	-4.68335	0.000186478	0.0754161	0.900744	YES
Wfdc12	3.81523	0.54913	4.66323	0.000194875	0.0754161	0.868076	YES
Cers3	1.68202	2.10763	4.66929	0.000192307	0.0754161	0.848147	YES
Garnl3	-0.969569	2.65393	-4.67082	0.000191664	0.0754161	0.794944	YES
Lmx1b	-1.59953	5.3623	-4.79931	0.000144756	0.0689507	0.78841	YES
Clhc1	-2.1397	-3.56754	-4.70629	0.00017735	0.0754161	0.771632	YES
Gpa33	2.47308	-0.27768	4.59884	0.000224428	0.080827	0.733445	YES
Ntmt1	-0.712667	3.34332	-4.65323	0.000199189	0.0754161	0.6869	YES
Trpv6	0.676788	6.93259	4.77372	0.000153061	0.0706282	0.671044	YES
Pde6a	-1.40156	0.21247	-4.5455	0.000252332	0.0887128	0.63149	YES
Mettl7b	-2.13289	1.20066	-4.51762	0.000268291	0.091815	0.560776	YES
Foxs1	-1.09687	0.544504	-4.50873	0.000273592	0.091815	0.556579	YES
Arr3	1.91502	-4.53524	4.61245	0.000217822	0.0804091	0.501261	YES
Cmtm5	-1.43397	-5.32905	-4.94909	0.000104552	0.0532349	0.411048	YES
Amigo2	1.0675	2.25676	4.46512	0.000301178	0.0927472	0.40431	YES
Rxfp4	2.27822	-4.4529	4.49062	0.000284721	0.0927472	0.29636	YES
Sectm1a	1.85353	3.61619	4.38188	0.000361917	0.102938	0.0476055	NO
Coro2a	-0.737937	5.49627	-4.45529	0.000307775	0.0927472	0.035846	YES
Mup11	1.8971	-5.4697	4.39628	0.00035058	0.102938	0.0314832	NO
Slc25a21	1.22207	-4.75704	4.46317	0.000302477	0.0927472	0.00828901	YES
Ctnnal1	-0.693564	5.81157	-4.46927	0.000298437	0.0927472	-0.0146273	YES
Olfr544	1.32861	-2.05267	4.25726	0.00047682	0.117345	-0.0280767	NO
Hoxc11	-2.25462	-5.05582	-4.31062	0.000423684	0.111485	-0.0820987	NO
Gm12887	1.69863	-4.54555	4.28276	0.000450636	0.114726	-0.110094	NO
Rab38	1.32834	1.05085	4.17648	0.000570359	0.133524	-0.14948	NO
Rnf148	1.42161	-2.49747	4.16991	0.000578732	0.133524	-0.198664	NO
Pgf	-1.13649	5.67691	-4.38114	0.000362509	0.102938	-0.205095	NO
Selenon	-0.319622	5.95862	-4.35037	0.00038802	0.106102	-0.244229	NO
Cst10	3.37531	-3.08497	4.18735	0.000556758	0.132598	-0.265717	NO
Zfp683	2.38906	-4.06911	4.14874	0.000606578	0.134834	-0.27582	NO
Klk11	3.17517	3.36801	4.15286	0.000601053	0.134834	-0.310355	NO
Tm4sf5	-1.74149	-3.32903	-4.11725	0.000650505	0.137359	-0.321447	NO
Myh4	5.36329	0.71223	4.06912	0.000723926	0.142527	-0.341728	NO
Tmem92	2.43527	-4.01794	4.12992	0.000632458	0.137336	-0.345945	NO
Tomm6	-0.354029	6.30722	-4.325	0.000410409	0.110184	-0.348249	NO
Fam189a1	-1.36745	-5.16601	-4.36315	0.000377209	0.105092	-0.390627	NO
Nsmf	-0.526756	6.1339	-4.30355	0.000430357	0.111485	-0.412722	NO
Ncbp1	-0.285433	6.97654	-4.2675	0.00046613	0.116659	-0.464964	NO
Pdk4	1.61451	2.85867	4.07174	0.000719715	0.142527	-0.472029	NO
Sult1d1	2.5347	-3.87773	4.04002	0.0007723	0.148101	-0.487622	NO
Hs3st1	0.987034	2.18043	4.0161	0.000814477	0.154187	-0.555268	NO
Plekha7	0.520087	6.9147	4.21929	0.000518685	0.125556	-0.591085	NO
Ckm	2.04088	2.69176	3.96779	0.000906882	0.169507	-0.642812	NO
Gm29094	1.93525	-4.04696	3.92943	0.000987668	0.172009	-0.677043	NO
Mrps27	-0.382011	5.06687	-4.09665	0.000680965	0.139654	-0.688417	NO
Cyp2s1	1.00899	1.12205	3.9072	0.00103775	0.178179	-0.700522	NO
Zic3	-1.86512	-4.61564	-3.9339	0.000977894	0.172009	-0.702927	NO
Mthfd1	-0.445735	5.96731	-4.14487	0.000611803	0.134834	-0.72173	NO
Cebpzos	-0.401108	3.89125	-4.05018	0.000755043	0.146697	-0.724093	NO
Ostn	1.52584	-3.71954	3.88328	0.0010945	0.179571	-0.724824	NO
Cd300e	1.2772	-3.15825	3.93066	0.000984981	0.172009	-0.739131	NO
Zfpm1	-0.695879	5.47897	-4.10137	0.000673866	0.139654	-0.746673	NO
Tspyl3	0.73142	2.4007	3.88532	0.00108954	0.179571	-0.777743	NO
Nog	3.27778	-2.35226	3.83671	0.00121401	0.186731	-0.788755	NO
Twf1	0.328944	6.86431	4.11679	0.000651169	0.137359	-0.789415	NO
Card14	1.17896	0.107104	3.8441	0.0011942	0.185617	-0.801875	NO
Gm14327	0.97446	-1.22284	3.82464	0.00124706	0.187899	-0.803211	NO
Taf1d	-0.679529	3.31438	-3.9283	0.000990164	0.172009	-0.852243	NO
Lage3	-0.337191	5.61917	-4.07327	0.000717281	0.142527	-0.866735	NO
Gm5105	1.93812	-4.25757	3.84488	0.00119214	0.185617	-0.875746	NO
Mybpc1	4.18431	-1.935	3.75324	0.00146183	0.19498	-0.950107	NO
Olfr1469	1.51831	-5.10974	3.77614	0.0013892	0.19498	-0.978151	NO
Gm20431	-5.0508	-1.77716	-3.73041	0.00153798	0.197477	-0.991067	NO
Farsa	-0.435379	5.21986	-3.95435	0.000934404	0.172009	-1.04341	NO
Mansc4	-1.72375	-0.435483	-3.7133	0.00159765	0.201631	-1.04458	NO
Lef1	-2.24719	1.22635	-3.74972	0.00147331	0.19498	-1.04815	NO
Pim2	-0.357056	4.24952	-3.90103	0.00105211	0.178316	-1.07278	NO
Faxc	-1.04833	-1.34485	-3.67575	0.0017368	0.211848	-1.09375	NO
Ceacam1	1.34781	5.85058	3.94184	0.000960763	0.172009	-1.14666	NO
Oxt	-1.61308	-3.70251	-3.65307	0.00182666	0.211848	-1.16507	NO
C5ar1	0.690273	3.90188	3.8451	0.00119155	0.185617	-1.16599	NO
Tlcd2	1.21564	0.420346	3.6667	0.00177213	0.211848	-1.16661	NO
Afp	1.4185	-3.48907	3.64017	0.0018798	0.211848	-1.20998	NO
Wwox	-0.370904	3.83644	-3.77456	0.00139409	0.19498	-1.2244	NO
Tmprss11f	1.77716	-4.60668	3.63255	0.00191189	0.212215	-1.22588	NO
Gtf2h4	-0.37323	3.98405	-3.81145	0.0012842	0.18885	-1.22854	NO
Trem3	1.42251	-4.4108	3.61465	0.00198948	0.216274	-1.23491	NO
Cenpp	-0.4514	3.58355	-3.77262	0.00140012	0.19498	-1.23498	NO
Fezf2	-1.61718	0.829467	-3.64903	0.00184313	0.211848	-1.23776	NO
Asap2	-0.586534	4.83712	-3.84946	0.00118005	0.185617	-1.27073	NO
Rnf10	-0.312754	8.30285	-3.89653	0.0010627	0.178316	-1.28412	NO
Clec4d	1.33684	0.938857	3.63683	0.00189381	0.211848	-1.29297	NO
B4galt2	-0.509989	4.09997	-3.77843	0.00138214	0.19498	-1.31229	NO
Vmn1r29	-1.3366	-2.29613	-3.56368	0.002228	0.23012	-1.31366	NO
Gda	0.842277	4.85582	3.81606	0.00127112	0.18885	-1.31546	NO
Nr3c2	1.71602	0.609599	3.60673	0.00202483	0.216657	-1.33581	NO
Cstdc4	2.61	-4.09407	3.55722	0.00226017	0.23012	-1.33743	NO
Rps7	-0.600144	6.60846	-3.87137	0.00112389	0.182367	-1.36554	NO
Rasl12	0.909863	3.20494	3.70723	0.00161939	0.202643	-1.3666	NO
Adi1	-0.326897	5.44675	-3.79937	0.00131921	0.190975	-1.37515	NO
Banp	-0.586656	5.61432	-3.80882	0.00129174	0.18885	-1.37541	NO
Art1	3.0693	-3.22082	3.5415	0.00234045	0.230137	-1.38595	NO
Pkia	0.793827	3.62042	3.72	0.00157401	0.200361	-1.39024	NO
F2	1.23125	-4.98451	3.56081	0.00224223	0.23012	-1.39317	NO
Prps1	-0.409459	5.3354	-3.82504	0.00124595	0.187899	-1.41169	NO
Sostdc1	2.59107	-1.24135	3.51128	0.00250277	0.233545	-1.41604	NO
Rad51ap2	2.02042	-4.16279	3.51929	0.00245866	0.23124	-1.42266	NO
Mc1r	-1.05753	-0.136921	-3.53567	0.00237091	0.230137	-1.42526	NO
Aspa	2.08727	1.89664	3.58679	0.00211653	0.223234	-1.43133	NO
Atp13a5	3.73762	-3.40798	3.49441	0.00259814	0.234048	-1.44368	NO
Olfr732	-1.66814	-3.6849	-3.49534	0.00259279	0.234048	-1.45132	NO
C1ql1	-0.863323	1.0378	-3.5497	0.00229819	0.230137	-1.46095	NO
Tmprss7	2.22484	-4.5415	3.49557	0.00259146	0.234048	-1.46271	NO
Ninl	-0.427561	4.05702	-3.69661	0.00165809	0.205742	-1.46772	NO
Fcrl6	1.64323	-4.98423	3.49646	0.00258635	0.234048	-1.47226	NO
Calcb	1.21812	0.00818527	3.50911	0.00251481	0.233545	-1.47607	NO
Tlr2	0.341767	5.47928	3.74801	0.00147892	0.19498	-1.47811	NO
Nat8f5	1.77905	-4.58897	3.48204	0.00267038	0.236113	-1.49439	NO
Tmem131l	-0.354813	6.23797	-3.76706	0.00141754	0.19498	-1.51047	NO
Scgb1a1	-2.44228	-1.73688	-3.45673	0.00282448	0.241614	-1.51921	NO
Fcgr4	0.932149	1.78498	3.55584	0.0022671	0.23012	-1.52023	NO
Prdx6b	1.22582	-3.21877	3.44364	0.00290758	0.246743	-1.53988	NO
Ankrd34b	-0.867978	0.606455	-3.49144	0.00261532	0.234048	-1.5595	NO
Tspan7	-0.562245	5.81859	-3.75591	0.00145317	0.19498	-1.56314	NO
Dcpp2	3.15396	-2.85808	3.42466	0.00303236	0.253589	-1.57615	NO
Zfp800	0.50008	4.40036	3.67906	0.00172408	0.211848	-1.59047	NO
Pus7	-0.438006	5.28987	-3.74066	0.00150333	0.196444	-1.59081	NO
Rps23	-0.370388	6.52753	-3.75297	0.00146271	0.19498	-1.60021	NO
Btbd17	-1.00975	2.3834	-3.53308	0.0023846	0.230137	-1.60844	NO
Aldh1l1	1.76054	0.259023	3.42234	0.00304798	0.253589	-1.61041	NO
Ogdh	0.334577	7.63855	3.73518	0.00152177	0.197109	-1.67124	NO
Fgf23	1.74744	-3.6371	3.37518	0.00338311	0.264849	-1.67554	NO
Adck5	-2.11347	-1.05041	-3.39378	0.00324674	0.260317	-1.7056	NO
Mctp2	0.782076	1.84396	3.46762	0.0027571	0.238078	-1.73114	NO
Mstn	2.42306	-3.95269	3.37187	0.00340792	0.264849	-1.73295	NO
Med16	-0.354959	5.27283	-3.62928	0.00192583	0.212215	-1.75027	NO
Sln	1.85646	-3.82598	3.34364	0.00362722	0.273636	-1.75882	NO
Fgf12	-2.39165	-2.21783	-3.32713	0.00376185	0.277411	-1.76291	NO
Amy1	1.35503	4.01314	3.55421	0.00227533	0.23012	-1.76401	NO
Alyref2	-0.479075	1.98733	-3.41634	0.00308868	0.253589	-1.76688	NO
Tmem8b	-0.444272	3.36742	-3.53965	0.00235004	0.230137	-1.77073	NO
Xirp2	4.08604	0.290434	3.36156	0.00348642	0.268127	-1.77773	NO
Washc1	-0.313422	5.80057	-3.66613	0.00177439	0.211848	-1.79164	NO
Olfr948	1.02286	-5.13161	3.34302	0.00363218	0.273636	-1.79315	NO
Fgd1	-0.355608	6.22606	-3.66189	0.00179116	0.211848	-1.80837	NO
Mmp25	-1.09119	-0.888754	-3.31629	0.00385296	0.278887	-1.81027	NO
Fam3a	-0.366528	5.4837	-3.64836	0.00184587	0.211848	-1.82019	NO
Pja1	-0.286533	6.52495	-3.64509	0.00185936	0.211848	-1.82129	NO
Thsd7a	1.38727	1.43724	3.38453	0.00331389	0.262454	-1.82163	NO
Pde1c	1.49298	3.71175	3.48636	0.00264493	0.235272	-1.8324	NO
Dtwd2	-0.5091	2.1584	-3.41596	0.00309129	0.253589	-1.84433	NO
Klk1b9	1.45337	-5.35331	3.30725	0.00393053	0.281739	-1.847	NO
Hsd17b10	-0.348685	6.30448	-3.64354	0.00186576	0.211848	-1.8515	NO
Upf3b	-0.279047	5.8471	-3.64092	0.00187668	0.211848	-1.86532	NO
Tmprss11e	2.54485	1.11022	3.35203	0.0035606	0.27211	-1.86808	NO
Spag16	1.6021	-4.22694	3.26983	0.00426837	0.288892	-1.86982	NO
Nell1	1.52375	-5.30997	3.27994	0.00417437	0.288032	-1.87699	NO
Zfp202	2.60199	-1.11801	3.27465	0.00422338	0.288318	-1.88483	NO
Trim27	-0.374391	6.30328	-3.60863	0.0020163	0.216657	-1.89285	NO
Efcab1	2.26164	-2.00681	3.25612	0.00439924	0.292609	-1.89722	NO
Olfr178	1.69766	-4.68669	3.25923	0.00436919	0.291925	-1.89814	NO
Mettl24	1.61871	-1.90731	3.24847	0.00447388	0.294917	-1.91729	NO
Tmod3	0.246828	7.48407	3.61409	0.00199196	0.216274	-1.93997	NO
Kif13b	0.522813	5.47107	3.5925	0.00208985	0.222005	-1.95294	NO
Actn3	2.72938	-0.250062	3.24215	0.00453658	0.296389	-1.96625	NO
Agmo	1.19968	0.958743	3.30379	0.00396066	0.282527	-1.96912	NO
Ido1	1.15123	-2.33669	3.21241	0.00484308	0.30561	-1.97857	NO
Ch25h	0.82092	1.90981	3.33666	0.00368354	0.276097	-1.98742	NO
C1qtnf12	-0.613233	4.85799	-3.52033	0.00245298	0.23124	-1.98745	NO
Fstl3	-0.602819	3.99632	-3.47901	0.00268836	0.236288	-1.99444	NO
Dmkn	1.33092	6.63615	3.53571	0.0023707	0.230137	-2.00007	NO
Bpifb1	2.35553	-2.5876	3.19735	0.00500594	0.311706	-2.00792	NO
Tpbgl	1.02092	0.733159	3.26604	0.00430423	0.288892	-2.0196	NO
Mical3	0.618891	5.21178	3.53623	0.00236795	0.230137	-2.02094	NO
Kcna3	1.69818	-3.41422	3.18723	0.00511834	0.3162	-2.02413	NO
Ppp1r14c	0.956501	2.63489	3.32275	0.00379839	0.277411	-2.03834	NO
Ccdc6	0.238036	6.70772	3.55505	0.00227111	0.23012	-2.05437	NO
Celsr3	1.07899	-1.78129	3.18108	0.00518798	0.3162	-2.06096	NO
C1qtnf4	-1.09847	0.205845	-3.22922	0.00466741	0.300655	-2.06497	NO
Cuzd1	1.23787	-5.15135	3.17994	0.00520088	0.3162	-2.06587	NO
Fam241a	0.470779	3.20298	3.36791	0.00343784	0.265775	-2.06763	NO
Slc4a8	1.21645	3.40287	3.32604	0.00377093	0.277411	-2.09201	NO
Pdlim7	-0.271997	7.47683	-3.52382	0.0024341	0.23124	-2.09767	NO
Tmprss4	1.7665	-1.11346	3.15197	0.00552987	0.318961	-2.11726	NO
C1qtnf5	-0.442107	2.44591	-3.27458	0.00422396	0.288318	-2.12856	NO
Prss16	-0.727183	3.99547	-3.39451	0.00324151	0.260317	-2.13273	NO
Ccdc146	1.39356	-2.19016	3.12511	0.00586475	0.327916	-2.1461	NO
Sestd1	0.392042	7.0157	3.47255	0.00272717	0.236878	-2.16161	NO
Sh3pxd2b	0.436419	7.64116	3.52756	0.00241394	0.23124	-2.16501	NO
Kcnip3	-0.575144	2.46943	-3.27317	0.0042371	0.288318	-2.17033	NO
Ankrd34a	-0.9841	-0.234788	-3.15893	0.0054462	0.317292	-2.17629	NO
Crx	-0.70787	-0.729745	-3.12182	0.0059072	0.327916	-2.17841	NO
Vstm4	-0.659182	0.239823	-3.16469	0.00537777	0.317292	-2.18995	NO
Bdnf	-0.949765	2.08517	-3.25096	0.00444942	0.29462	-2.19817	NO
Slc9a3r2	-0.529933	6.23275	-3.49278	0.00260754	0.234048	-2.21086	NO
Cmbl	0.775729	1.13665	3.17411	0.00526788	0.317292	-2.21167	NO
Hmgcl	-0.351919	4.21149	-3.39174	0.00326146	0.260317	-2.21816	NO
Pirt	1.15516	-1.70076	3.08151	0.00645113	0.342653	-2.23911	NO
AW209491	-0.375804	3.46715	-3.31048	0.00390263	0.281103	-2.23919	NO
Tph2	1.88623	-4.54278	3.0631	0.00671546	0.347932	-2.24483	NO
Cfap45	1.42988	1.14712	3.16475	0.00537715	0.317292	-2.24569	NO
Olfr816	0.95918	-3.09561	3.06438	0.00669677	0.347932	-2.25351	NO
Nwd1	0.671588	-1.15847	3.09125	0.00631542	0.341387	-2.25853	NO
Palmd	0.890418	7.01687	3.47446	0.00271563	0.236878	-2.27708	NO
Nmur1	-1.78573	-4.57181	-3.04153	0.00703878	0.352967	-2.28293	NO
Slc10a5	1.67559	-4.02147	3.04068	0.00705169	0.352967	-2.28448	NO
Prss32	2.46353	-1.13062	3.06923	0.00662636	0.347932	-2.28717	NO
Elob	-0.323934	7.58188	-3.45572	0.00283078	0.241614	-2.29692	NO
Mfsd10	-0.352187	6.19996	-3.4174	0.00308147	0.253589	-2.30167	NO
Ppard	-0.315294	5.91185	-3.42341	0.00304076	0.253589	-2.31553	NO
Cdk6	0.883131	6.08252	3.39891	0.00321012	0.260317	-2.33079	NO
Gm15217	1.15949	-5.22146	3.01869	0.00739746	0.359155	-2.33573	NO
Etv4	-0.865344	5.53066	-3.39556	0.003234	0.260317	-2.35367	NO
Olfr101	1.86504	-3.88127	3.00086	0.00768974	0.367465	-2.35688	NO
Mpp5	-0.780092	4.02333	-3.29561	0.0040327	0.286283	-2.35906	NO
Igsf5	1.05665	2.93098	3.22376	0.00472382	0.300655	-2.36307	NO
Mfsd13a	-0.928142	2.58551	-3.20687	0.00490233	0.308033	-2.37952	NO
Olfr1055	-1.10165	-3.07022	-2.98768	0.00791303	0.370507	-2.38307	NO
Myo18b	1.93136	-3.34296	2.98483	0.00796222	0.370507	-2.38454	NO
Klk1b26	1.46957	-5.19597	2.97702	0.00809819	0.370507	-2.40812	NO
Pebp1	-0.374491	8.17521	-3.38318	0.00332378	0.262454	-2.41484	NO
Dcpp1	3.47873	-2.09141	2.98142	0.00802135	0.370507	-2.4151	NO
Adgrf3	-1.36458	-5.0159	-2.96537	0.00830543	0.370507	-2.41908	NO
Ndst4	2.34626	-3.31052	2.96918	0.00823711	0.370507	-2.42496	NO
Cyp2j6	1.28943	1.38312	3.0962	0.00624744	0.341387	-2.42927	NO
Slc35f2	1.01341	-0.453324	3.00209	0.00766918	0.367465	-2.43493	NO
Zfp365	0.841299	0.739494	3.04533	0.00698073	0.3518	-2.44464	NO
Podxl	-0.595755	6.59433	-3.37208	0.00340637	0.264849	-2.44542	NO
Tor2a	-0.32751	5.11875	-3.33422	0.00370348	0.27619	-2.45542	NO
Olfr54	1.34656	-4.63171	2.93883	0.00879665	0.382064	-2.46494	NO
Sms	-0.343034	5.55407	-3.3502	0.00357506	0.27211	-2.46699	NO
Gm11032	0.657988	-1.38916	2.96898	0.0082406	0.370507	-2.47182	NO
Smn1	-0.338856	5.1981	-3.28215	0.00415414	0.288032	-2.4741	NO
Nop16	-0.305336	4.67658	-3.24016	0.00455643	0.296389	-2.47695	NO
Lamtor4	-0.283322	5.4103	-3.32494	0.00378013	0.277411	-2.48104	NO
Ceacam19	1.19139	0.460361	3.00412	0.00763549	0.367249	-2.48215	NO
Brd3	-0.259646	7.16633	-3.26682	0.00429683	0.288892	-2.48868	NO
Ppfia4	-1.32045	-1.32032	-2.96639	0.00828699	0.370507	-2.49549	NO
Vopp1	0.457967	4.73092	3.28011	0.00417285	0.288032	-2.50841	NO
Fbxo10	-0.263455	4.77419	-3.22412	0.00472006	0.300655	-2.51808	NO
Slurp1	1.32478	0.637273	2.97557	0.00812372	0.370507	-2.52461	NO
Mfsd1	0.584522	5.77061	3.29059	0.00407757	0.288032	-2.52782	NO
Gm14548	1.08032	-1.17366	2.93619	0.00884718	0.382064	-2.53974	NO
Kif28	1.04861	-2.56299	2.91812	0.0091995	0.384548	-2.53979	NO
Tacc2	0.617619	6.42895	3.32092	0.00381378	0.277411	-2.54146	NO
Orai1	-0.350814	5.15328	-3.28193	0.0041561	0.288032	-2.5456	NO
Dnajc17	-0.505798	3.14239	-3.14759	0.0055832	0.319541	-2.5526	NO
Ceacam20	-0.812803	-1.22406	-2.91398	0.00928228	0.384548	-2.55374	NO
Gm12689	-0.87264	-1.94009	-2.89543	0.00966141	0.390157	-2.56397	NO
Car8	1.7736	1.71371	3.03484	0.00714195	0.354086	-2.57371	NO
Neb	1.36587	1.35954	2.98199	0.00801133	0.370507	-2.57433	NO
Pcdhb16	0.940137	-0.306788	2.93103	0.00894636	0.382064	-2.59509	NO
Fam13a	1.07423	1.94416	3.03682	0.00711126	0.354086	-2.5955	NO
Col26a1	1.82275	-3.62587	2.86218	0.0103788	0.400355	-2.59874	NO
Crybg3	0.677854	4.50005	3.17974	0.00520317	0.3162	-2.60829	NO
Ss18l2	0.295968	3.72697	3.12284	0.00589398	0.327916	-2.6194	NO
Kctd11	-0.562194	5.87268	-3.28597	0.00411935	0.288032	-2.62017	NO
Fbxl15	-0.437805	3.95048	-3.16077	0.00542427	0.317292	-2.62453	NO
Zfp804b	1.27435	-4.51477	2.8456	0.0107555	0.407947	-2.62718	NO
Krt81	1.33336	-4.15151	2.84672	0.0107296	0.407947	-2.62777	NO
Fam43a	-0.497443	3.84779	-3.15794	0.00545796	0.317292	-2.63101	NO
Cyct	-1.32497	-5.01119	-2.84149	0.0108508	0.407947	-2.63446	NO
Edar	1.30568	-0.0471692	2.92467	0.00907019	0.382658	-2.6394	NO
Spata25	1.73523	-4.98389	2.83884	0.0109128	0.407947	-2.6396	NO
Unc93a2	2.16067	-3.40386	2.84704	0.0107222	0.407947	-2.64311	NO
Agr3	1.39008	-4.38658	2.83484	0.0110068	0.409543	-2.64533	NO
Ptgdr2	1.23426	-3.01599	2.84235	0.0108309	0.407947	-2.65874	NO
Alpk1	0.892762	0.280705	2.93046	0.00895741	0.382064	-2.66397	NO
Tmem144	0.913345	2.5046	3.04533	0.00698065	0.3518	-2.66975	NO
Ankk1	2.55936	0.620855	2.90612	0.00944107	0.38832	-2.68107	NO
Ccna1	1.22479	-0.885727	2.82693	0.0111955	0.411225	-2.68407	NO
Asb11	2.55692	-3.16569	2.81087	0.0115876	0.416509	-2.69345	NO
Vav2	-0.388853	5.49795	-3.22688	0.0046915	0.300655	-2.70148	NO
AI467606	1.12635	3.6794	3.10331	0.00615109	0.337647	-2.70302	NO
Gm36368	-1.13893	-3.21498	-2.81234	0.0115511	0.416509	-2.70556	NO
Vnn1	2.25026	-2.1	2.81518	0.011481	0.416509	-2.71121	NO
Chpf	-0.493649	4.54247	-3.17139	0.0052994	0.317292	-2.71206	NO
Nek8	-0.733959	3.17797	-3.06374	0.00670607	0.347932	-2.71481	NO
Pappa2	0.673509	-1.49694	2.82979	0.011127	0.411225	-2.71819	NO
Lctl	0.76961	-0.408311	2.84381	0.010797	0.407947	-2.72045	NO
Hsh2d	0.969554	2.13157	2.98957	0.00788072	0.370507	-2.72205	NO
Isyna1	-0.403022	6.53157	-3.232	0.00463899	0.300436	-2.7287	NO
Fastkd3	-0.650178	2.60898	-3.01738	0.00741855	0.359155	-2.73242	NO
Pgp	-0.418648	6.11556	-3.24385	0.00451967	0.296389	-2.73356	NO
Mak	2.50502	0.0830468	2.87073	0.0101896	0.398042	-2.73577	NO
Tead4	0.539881	5.02893	3.1957	0.00502411	0.311706	-2.74134	NO
Map4k5	-0.620803	4.31145	-3.14918	0.00556368	0.319541	-2.74391	NO
Scd1	0.473717	7.21896	3.22062	0.00475649	0.301435	-2.74698	NO
Pheta1	-0.341024	5.21832	-3.15826	0.00545413	0.317292	-2.75074	NO
Mrrf	-0.336348	4.22128	-3.13456	0.00574478	0.325009	-2.75163	NO
Tmem71	0.931912	1.18935	2.92797	0.00900577	0.382064	-2.7569	NO
Zcchc10	0.39741	3.8829	3.08484	0.00640436	0.342633	-2.76076	NO
Zfp454	1.0389	-0.10701	2.84087	0.0108654	0.407947	-2.76126	NO
Gm10309	1.4635	-4.48337	2.77235	0.0125831	0.423717	-2.76225	NO
Ffar4	-1.38158	1.63205	-2.94545	0.00867154	0.378828	-2.76441	NO
Npepl1	-0.327461	5.1037	-3.13937	0.00568453	0.324084	-2.77658	NO
Myh6	-1.07494	-2.20804	-2.78464	0.0122569	0.419925	-2.77801	NO
Llcfc1	1.55856	-2.11141	2.78472	0.0122547	0.419925	-2.78809	NO
Ergic2	-0.371787	7.34178	-3.15238	0.00552493	0.318961	-2.79285	NO
Zfp729b	-0.317875	3.81515	-3.05082	0.0068977	0.350707	-2.79629	NO
Abcg4	1.05899	-0.248199	2.80764	0.011668	0.418178	-2.79726	NO
Gatm	0.432217	5.1836	3.15826	0.00545417	0.317292	-2.79855	NO
Oit3	1.24026	-4.34855	2.74855	0.0132385	0.424638	-2.8017	NO
Gm5737	-1.21321	-4.97127	-2.7402	0.0134761	0.427015	-2.80573	NO
Smr3a	3.39379	-2.20237	2.75991	0.0129215	0.424124	-2.80649	NO
Olfr145	0.80371	-2.71434	2.7628	0.0128421	0.423717	-2.80903	NO
Obox1	-0.748957	-5.35416	-2.75523	0.0130513	0.424124	-2.81344	NO
Gngt1	0.744904	-1.22599	2.79066	0.0121001	0.419925	-2.81509	NO
Vmn2r74	-1.18217	-1.99168	-2.77245	0.0125803	0.423717	-2.81618	NO
Trpa1	2.04786	-3.51036	2.7355	0.0136116	0.428056	-2.82129	NO
Abca5	0.290994	4.37734	3.12512	0.00586464	0.327916	-2.82162	NO
Pou3f3	-0.908703	-1.71106	-2.78054	0.0123648	0.421622	-2.82243	NO
Entpd3	0.911237	1.01861	2.87106	0.0101823	0.398042	-2.82332	NO
Cds1	1.06137	3.26302	3.02039	0.0073702	0.359155	-2.83	NO
Olfr1428	0.988755	-4.84322	2.72008	0.0140653	0.428056	-2.83935	NO
Telo2	-0.31489	4.28278	-3.09106	0.00631793	0.341387	-2.8406	NO
Sar1b	0.369551	5.24962	3.16152	0.00541536	0.317292	-2.84103	NO
Asic3	2.21507	-3.04006	2.73814	0.0135353	0.427972	-2.84193	NO
Dppa2	-1.38141	-1.7679	-2.77195	0.0125937	0.423717	-2.84202	NO
Lap3	-0.405803	6.9206	-3.19611	0.0050196	0.311706	-2.84595	NO
Npas3	-0.825118	2.48759	-2.95345	0.00852264	0.375657	-2.84752	NO
Dsg3	0.943449	7.78061	3.16016	0.00543152	0.317292	-2.84975	NO
Slc7a5	-0.700405	6.73327	-3.1797	0.00520362	0.3162	-2.85224	NO
Gm14419	1.16502	-4.99529	2.71145	0.0143259	0.428056	-2.85691	NO
Nnat	-1.19375	0.0108728	-2.80403	0.0117587	0.418241	-2.86487	NO
Slc34a3	1.83285	-3.73682	2.71788	0.0141314	0.428056	-2.86586	NO
Gm44973	-1.91247	-4.74131	-2.69478	0.0148418	0.429557	-2.88597	NO
Mcub	0.615111	0.766547	2.81622	0.0114554	0.416509	-2.89798	NO
Trpv5	1.34865	-2.47305	2.70805	0.0144297	0.428056	-2.90065	NO
Hus1b	0.950818	-3.16621	2.69553	0.0148183	0.429557	-2.90074	NO
Ddr2	1.43357	4.06926	3.02368	0.00731761	0.357788	-2.90228	NO
Olfr1402	-0.571454	0.148378	-2.79281	0.0120444	0.419925	-2.903	NO
Agtr2	1.26533	-4.75143	2.68186	0.0152538	0.429557	-2.90638	NO
Tmem121	-0.711873	3.00274	-2.9657	0.00829942	0.370507	-2.90702	NO
Akna	-0.334875	5.2101	-3.09067	0.0063233	0.341387	-2.91348	NO
Fga	0.985765	-5.10672	2.67432	0.0154993	0.434108	-2.91507	NO
Mfsd4b1	1.59915	-4.30582	2.68298	0.0152177	0.429557	-2.91532	NO
Gyg	0.370579	4.91246	3.08574	0.00639184	0.342633	-2.91625	NO
Nox1	-0.940838	-1.03858	-2.74605	0.0133092	0.424638	-2.91789	NO
Pvalb	4.60515	-1.46693	2.73365	0.0136653	0.428056	-2.91838	NO
Gcfc2	0.533234	3.40621	2.97871	0.0080686	0.370507	-2.92283	NO
S100g	2.81389	-0.810096	2.73104	0.0137413	0.428056	-2.92315	NO
Apool	-0.34589	4.83504	-3.11076	0.00605179	0.33445	-2.92528	NO
Brinp3	2.04519	2.65326	2.90132	0.00953939	0.389198	-2.92696	NO
Sla2	-0.61282	0.220036	-2.78992	0.0121193	0.419925	-2.92744	NO
Gmpr	1.1067	1.90519	2.88695	0.00983961	0.391622	-2.9388	NO
Ccl2	0.780191	1.95209	2.86801	0.0102493	0.398266	-2.94277	NO
Sh3glb2	-0.260983	6.03171	-3.10937	0.0060702	0.33445	-2.94856	NO
Dclk1	0.657195	4.83197	3.08984	0.00633483	0.341387	-2.95874	NO
Lce3c	-1.39399	-5.19014	-2.6493	0.016341	0.43834	-2.95988	NO
Fam184a	-1.92408	-2.53844	-2.67792	0.0153818	0.431801	-2.96146	NO
Tfcp2l1	0.810426	6.30193	3.13534	0.00573494	0.325009	-2.96748	NO
Cyp26c1	1.63088	-3.48074	2.66223	0.0159008	0.434819	-2.96952	NO
Dgkz	-0.415936	6.71204	-3.12394	0.00587981	0.327916	-2.9708	NO
Plscr2	0.460459	3.82352	2.96629	0.00828878	0.370507	-2.97274	NO
Fam222a	-0.864216	0.943557	-2.80162	0.0118194	0.418241	-2.97538	NO
Bag5	-0.342347	4.91884	-3.0499	0.00691155	0.350707	-2.97756	NO
Slc4a7	0.454427	5.7119	3.07839	0.00649519	0.343756	-2.98157	NO
Armc2	0.977514	1.23197	2.79843	0.0119004	0.419384	-2.99388	NO
Pfkfb4	0.757397	3.43927	2.93447	0.00888001	0.382064	-2.99647	NO
Pgam2	1.50313	1.26807	2.78566	0.0122302	0.419925	-3.00099	NO
Prkd1	-0.636315	4.41418	-3.03304	0.00716998	0.354086	-3.00382	NO
Kctd4	1.26773	-3.63095	2.63238	0.016935	0.442113	-3.0208	NO
Slc24a2	2.00558	-0.0759926	2.68896	0.0150261	0.429557	-3.02179	NO
Myl7	1.94669	-1.27201	2.68462	0.0151647	0.429557	-3.02237	NO
Gm11634	1.11626	-3.39741	2.62807	0.0170896	0.443241	-3.02284	NO
Olfr671	-0.683958	-1.45709	-2.6719	0.0155787	0.434176	-3.02707	NO
Trpm8	1.1864	-5.04238	2.61131	0.0177031	0.44992	-3.02847	NO
Mapk8ip1	-0.478476	5.29206	-3.05778	0.0067939	0.349542	-3.03421	NO
Cyp2d9	1.39256	-3.59877	2.63205	0.0169468	0.442113	-3.03525	NO
Clip1	0.427842	6.47648	3.06664	0.00666389	0.347932	-3.04061	NO
Tmem233	2.26251	-3.9114	2.59966	0.0181421	0.454044	-3.04267	NO
Ext2	-0.29509	6.44226	-3.06956	0.00662158	0.347932	-3.04679	NO
Ehmt1	-0.289396	5.9111	-3.08315	0.00642803	0.342653	-3.0473	NO
Tex16	-2.0292	-3.58906	-2.60542	0.0179238	0.451643	-3.04995	NO
Ubxn10	1.16693	0.622486	2.74247	0.0134111	0.426447	-3.05352	NO
Olfr120	0.783088	-2.65538	2.62249	0.0172915	0.444047	-3.05422	NO
Tnfrsf18	-0.61595	4.72642	-3.03021	0.00721435	0.35509	-3.05641	NO
Bri3bp	-0.315671	6.31246	-3.05174	0.0068839	0.350707	-3.06764	NO
Shisal2a	-1.21757	-5.24497	-2.57815	0.0189793	0.462099	-3.07419	NO
Catspere2	-1.48798	-3.55924	-2.59648	0.0182637	0.455752	-3.07874	NO
Dna2	-0.486906	3.69625	-2.9323	0.00892183	0.382064	-3.08184	NO
Art5	1.48601	-0.818308	2.6623	0.0158985	0.434819	-3.08716	NO
Klhl38	1.13648	-1.69527	2.63538	0.0168281	0.442113	-3.08816	NO
Vmn2r11	0.873182	-0.165734	2.68532	0.0151423	0.429557	-3.08872	NO
Vmn2r16	0.700825	-2.58831	2.60189	0.0180573	0.45269	-3.09158	NO
Slc35g3	1.1516	-4.42175	2.57695	0.0190272	0.462099	-3.09176	NO
Vsig8	2.08872	-0.520571	2.64624	0.016447	0.438632	-3.09287	NO
Ankrd16	-0.617341	0.703725	-2.70578	0.0144992	0.428056	-3.09633	NO
Sh2d1a	-1.85452	-3.53745	-2.58161	0.0188422	0.461399	-3.10272	NO
Vwa2	-1.48583	-1.39686	-2.62418	0.0172302	0.443241	-3.10616	NO
Gm45717	-1.02341	-2.27601	-2.5792	0.0189378	0.462099	-3.12196	NO
Morc3	0.28769	6.22235	3.0503	0.00690558	0.350707	-3.12467	NO
Slc10a4	1.45733	-4.64507	2.56006	0.0197119	0.47081	-3.12504	NO
Abca2	-0.349095	6.09125	-3.06108	0.00674514	0.348247	-3.13984	NO
Bpifb5	1.89247	-3.22984	2.56944	0.0193289	0.464378	-3.14092	NO
Pon3	0.535464	4.13017	2.88309	0.00992176	0.392774	-3.14456	NO
S100a13	-0.22952	5.63591	-2.98783	0.00791041	0.370507	-3.14543	NO
Gm44511	1.36105	-2.92512	2.57067	0.0192793	0.464378	-3.14624	NO
Sncg	1.31515	3.58836	2.8667	0.0102783	0.398345	-3.14967	NO
Bdkrb1	1.27079	0.346104	2.6524	0.0162346	0.438245	-3.15361	NO
Asgr1	1.1708	-4.27775	2.54162	0.0204863	0.475142	-3.15379	NO
Amelx	-1.14502	-4.95901	-2.53497	0.0207726	0.476007	-3.15497	NO
Hnmt	1.25795	-0.678312	2.62473	0.01721	0.443241	-3.15808	NO
Gas2	-0.606072	1.11908	-2.70663	0.0144733	0.428056	-3.16033	NO
Kcna4	2.30973	-2.51712	2.57515	0.0190991	0.462324	-3.16256	NO
Trub1	-0.42509	2.8313	-2.81093	0.011586	0.416509	-3.16654	NO
Ccdc153	1.26517	-3.29413	2.54731	0.0202444	0.473989	-3.16687	NO
Cln8	0.421981	5.02582	2.97207	0.00818559	0.370507	-3.17707	NO
Msr1	0.72759	3.9994	2.91775	0.00920683	0.384548	-3.17791	NO
Flywch1	-0.391063	6.43146	-3.03321	0.00716744	0.354086	-3.18767	NO
Vmn1r211	-1.48525	-4.07703	-2.5165	0.0215872	0.482968	-3.19233	NO
Olfr545	1.88539	-3.84406	2.5224	0.0213236	0.481444	-3.19942	NO
Pfkl	-0.417999	7.72019	-3.02826	0.00724495	0.355412	-3.21548	NO
Eif2s2	-0.250004	7.10326	-2.99354	0.00781308	0.370507	-3.2214	NO
Kcnab2	-0.315129	4.96123	-2.89372	0.00969712	0.390157	-3.22349	NO
Mrps36	-0.335945	4.38944	-2.89454	0.00967987	0.390157	-3.22498	NO
Nudt17	-0.731541	1.08148	-2.68316	0.0152119	0.429557	-3.23085	NO
Supt3	-0.45789	4.09745	-2.90641	0.00943506	0.38832	-3.23333	NO
Large1	-0.523305	6.7897	-2.98062	0.00803529	0.370507	-3.2351	NO
Efna2	-0.404064	3.83238	-2.83988	0.0108884	0.407947	-3.23545	NO
Ndufb11	-0.240056	7.05123	-3.01559	0.00744741	0.359374	-3.23831	NO
Olfr901	-0.77958	-1.29606	-2.55439	0.0199472	0.472778	-3.24239	NO
Gpr82	0.751676	-2.09472	2.53679	0.0206939	0.476007	-3.2432	NO
Tfeb	-0.461203	5.28007	-2.96758	0.00826575	0.370507	-3.24513	NO
Rel	0.423606	4.51322	2.91323	0.00929728	0.384548	-3.24834	NO
Ces1e	1.04244	-5.19471	2.47094	0.0237281	0.499024	-3.25069	NO
Tbx4	1.38064	-4.6778	2.47632	0.0234651	0.49854	-3.25533	NO
Sypl2	1.52596	-0.937275	2.53073	0.0209569	0.476007	-3.26292	NO
Lrrc28	0.421709	2.50995	2.75824	0.0129676	0.424124	-3.26306	NO
Slc39a8	0.830832	2.63871	2.74183	0.0134293	0.426447	-3.26323	NO
Casp4	0.825472	2.73196	2.76611	0.0127517	0.423717	-3.2661	NO
Arpc1a	-0.304853	7.39785	-2.98652	0.00793295	0.370507	-3.26986	NO
Tceal5	1.93793	-3.76887	2.47099	0.0237255	0.499024	-3.2746	NO
Susd1	0.642989	1.75149	2.69892	0.0147121	0.429557	-3.27738	NO
Zfp184	-0.719565	3.09653	-2.78406	0.012272	0.419925	-3.27999	NO
Olfr1509	-0.916296	-5.02092	-2.44593	0.0249867	0.505415	-3.28154	NO
Mpzl1	-0.331261	7.41374	-2.93655	0.00884021	0.382064	-3.28163	NO
Egr4	-1.46277	-2.10842	-2.51621	0.0216005	0.482968	-3.28404	NO
Gata2	1.71854	2.02006	2.71414	0.0142441	0.428056	-3.28601	NO
Ints4	0.283448	5.3969	2.93479	0.00887386	0.382064	-3.28732	NO
Gm45844	-1.29322	1.78283	-2.69523	0.0148277	0.429557	-3.2898	NO
Tob1	0.467752	5.11956	2.92902	0.00898534	0.382064	-3.29075	NO
Klhdc7b	1.05644	-3.71691	2.46297	0.0241226	0.500188	-3.29179	NO
Mgat4a	0.49613	5.99224	2.97934	0.00805751	0.370507	-3.29543	NO
Krt9	1.09248	-5.02914	2.44932	0.0248125	0.503964	-3.29826	NO
Serinc2	-0.372305	8.20077	-2.95998	0.00840293	0.373728	-3.30007	NO
Add1	-0.276637	8.46007	-2.94779	0.00862783	0.378828	-3.30141	NO
V1ra8	0.999239	-5.31971	2.43622	0.0254917	0.508181	-3.30816	NO
Tnfrsf4	-0.746127	2.31619	-2.69646	0.014789	0.429557	-3.30873	NO
Car9	-0.807038	4.74558	-2.86901	0.0102273	0.398266	-3.31408	NO
Npffr2	1.81691	-4.51917	2.44282	0.0251476	0.507169	-3.31533	NO
Cabp7	0.848074	-3.34486	2.45308	0.0246206	0.503705	-3.31598	NO
Ogdhl	0.833924	-0.792014	2.52288	0.0213025	0.481444	-3.31649	NO
Slc38a5	1.16373	-2.75218	2.46912	0.0238174	0.499024	-3.31784	NO
Apof	1.54925	-4.40442	2.44177	0.025202	0.507169	-3.31906	NO
Efna1	-0.549344	6.62379	-2.94584	0.0086642	0.378828	-3.32016	NO
Spout1	-0.445082	4.78658	-2.89705	0.00962772	0.390157	-3.32044	NO
Gm11992	1.33047	-1.8566	2.48976	0.0228206	0.491926	-3.32191	NO
Klk1	1.774	-1.80677	2.51912	0.0214699	0.482665	-3.32529	NO
Rai14	0.351143	7.1936	2.97718	0.00809539	0.370507	-3.32701	NO
Akr7a5	-0.313694	5.1904	-2.92672	0.00903022	0.382064	-3.32709	NO
Vmn1r71	-0.791769	-2.54581	-2.46759	0.0238934	0.499024	-3.32747	NO
Ttpa	1.64317	2.25353	2.74616	0.013306	0.424638	-3.32788	NO
Raet1d	1.35271	-0.406587	2.54166	0.0204844	0.475142	-3.32829	NO
Ptx3	-1.2083	4.16179	-2.8458	0.0107509	0.407947	-3.32892	NO
Atp7b	-1.14522	-0.471842	-2.5314	0.0209276	0.476007	-3.32903	NO
Zmynd10	0.923729	-0.723653	2.52475	0.0212199	0.480572	-3.33007	NO
Jakmip2	1.0624	-2.01277	2.48803	0.0229027	0.492976	-3.33086	NO
Pir	1.17586	2.74966	2.68452	0.0151681	0.429557	-3.33149	NO
Dclk2	-0.907912	1.96199	-2.66823	0.0157001	0.434301	-3.3357	NO
Arhgap25	0.473576	2.03326	2.68322	0.0152098	0.429557	-3.33731	NO
Csf2	-2.06617	-3.43335	-2.45757	0.0243932	0.501697	-3.33844	NO
Aqr	-0.267271	5.91095	-2.89999	0.00956683	0.389198	-3.34326	NO
Ktn1	0.470785	6.61013	2.95371	0.00851795	0.375657	-3.34581	NO
Msantd3	-0.487236	3.93337	-2.82711	0.011191	0.411225	-3.34695	NO
Kcnu1	-1.42545	-3.63809	-2.43466	0.0255741	0.508931	-3.34716	NO
Lss	-0.358553	3.24562	-2.75192	0.0131436	0.424638	-3.34843	NO
Xdh	0.648051	4.99587	2.90443	0.00947556	0.388656	-3.34856	NO
Caskin1	-0.642201	2.68923	-2.72041	0.0140555	0.428056	-3.35165	NO
Fancc	-0.316317	4.04929	-2.80302	0.0117842	0.418241	-3.35373	NO
Espn	-0.405195	5.31135	-2.87114	0.0101806	0.398042	-3.35646	NO
Gm15448	1.79803	-3.88391	2.42882	0.0258836	0.509562	-3.35979	NO
Kif5a	-0.405424	3.13869	-2.66349	0.0158584	0.434819	-3.36087	NO
Stx11	0.264327	4.08329	2.76438	0.012799	0.423717	-3.36324	NO
Cdca7	-0.265131	5.55145	-2.88357	0.00991168	0.392774	-3.36542	NO
Depdc5	-0.272775	5.76122	-2.91803	0.00920125	0.384548	-3.36767	NO
Scfd2	-0.31861	3.02629	-2.72607	0.0138875	0.428056	-3.37808	NO
Esrrb	-1.04541	-3.05016	-2.41718	0.0265105	0.509746	-3.37818	NO
Ccnd3	-0.357418	6.70948	-2.95695	0.00845833	0.375062	-3.38044	NO
Plaur	-0.500361	4.34612	-2.8303	0.0111146	0.411225	-3.38357	NO
Gm16434	1.00777	-5.34718	2.38773	0.0281621	0.514656	-3.38485	NO
Gm6676	1.00777	-5.34718	2.38773	0.0281621	0.514656	-3.38485	NO
Sirpb1b	1.26746	-2.79086	2.40836	0.0269954	0.51018	-3.39133	NO
Grin2d	-0.609914	2.7732	-2.72919	0.0137956	0.428056	-3.39311	NO
Glra3	-0.799449	-5.27943	-2.38432	0.028359	0.516901	-3.39567	NO
Ccdc177	-1.44722	-0.254043	-2.53594	0.0207304	0.476007	-3.39872	NO
Dsc3	1.88441	3.50591	2.65423	0.016172	0.438158	-3.40485	NO
Eya4	1.43564	3.89799	2.74585	0.0133149	0.424638	-3.40569	NO
Fcf1	-0.396636	5.17333	-2.88707	0.00983709	0.391622	-3.40751	NO
Pls1	1.45198	1.75467	2.58467	0.0187219	0.460968	-3.41087	NO
Nrm	-0.270897	6.54778	-2.89994	0.00956786	0.389198	-3.41511	NO
Abl1	-0.272934	7.0968	-2.91711	0.0092197	0.384548	-3.41596	NO
Gm7102	-0.684649	-0.63387	-2.47691	0.0234366	0.49854	-3.41775	NO
Zap70	-0.66019	-1.69841	-2.41147	0.0268235	0.51018	-3.41785	NO
Phf10	-0.299195	5.81161	-2.89078	0.00975873	0.390508	-3.41877	NO
Klhl23	-0.432534	3.89921	-2.80082	0.0118397	0.418241	-3.42302	NO
Tmem252	0.962824	1.41823	2.5752	0.0190973	0.462324	-3.42326	NO
Dnmt3b	-0.585369	2.79466	-2.68825	0.0150485	0.429557	-3.4265	NO
Pold4	-0.38814	3.36182	-2.72922	0.0137946	0.428056	-3.42911	NO
Rps10	-0.359914	8.84321	-2.91453	0.00927115	0.384548	-3.43261	NO
Klk12	1.91708	-3.10734	2.40517	0.0271729	0.510752	-3.43398	NO
Foxred2	0.688511	1.62747	2.587	0.0186306	0.460968	-3.43693	NO
Tyr	-0.698139	-1.46197	-2.42165	0.0262685	0.509746	-3.43951	NO
Slc25a25	-0.221152	4.84267	-2.81065	0.0115932	0.416509	-3.4478	NO
Asl	-0.322533	4.82997	-2.82291	0.0112924	0.413755	-3.4535	NO
Mta3	-0.420995	6.12469	-2.89175	0.0097383	0.390508	-3.45564	NO
Hcn2	-0.614595	2.6509	-2.63924	0.0166919	0.441708	-3.46299	NO
Tgm4	-1.25784	-3.16841	-2.3617	0.0297011	0.527757	-3.46392	NO
Drp2	-0.636605	1.8598	-2.59626	0.0182721	0.455752	-3.46406	NO
Znhit2	-0.373076	4.24788	-2.78711	0.0121921	0.419925	-3.46461	NO
Gsdmd	0.519038	3.45975	2.69941	0.0146966	0.429557	-3.47207	NO
Ube4a	0.298243	6.37413	2.87783	0.010035	0.395425	-3.4759	NO
Dgka	-0.278863	5.00523	-2.76231	0.0128556	0.423717	-3.47662	NO
Trpc5os	-1.88269	-2.42803	-2.39987	0.02747	0.51299	-3.47765	NO
Rorc	-0.383858	4.56253	-2.77644	0.0124735	0.423411	-3.47958	NO
Srgn	0.566942	4.43991	2.7905	0.0121041	0.419925	-3.48115	NO
Sec16b	0.854514	2.41862	2.62886	0.0170612	0.443241	-3.48146	NO
Lyzl4	0.728667	-1.36128	2.43679	0.0254622	0.508181	-3.4818	NO
Vps41	-0.225938	5.80607	-2.84893	0.0106788	0.407947	-3.48464	NO
Olfr1290	0.973462	-3.46335	2.36097	0.0297453	0.527907	-3.48482	NO
Slc37a2	0.52291	2.75404	2.64496	0.0164917	0.438768	-3.48613	NO
Mutyh	-0.457401	3.29276	-2.68196	0.0152506	0.429557	-3.48656	NO
Pigr	1.42296	1.77283	2.58417	0.0187414	0.460968	-3.48736	NO
Cd200r1	1.3605	-1.19148	2.41929	0.0263958	0.509746	-3.49022	NO
Olfr1122	0.554223	-0.0976064	2.46387	0.0240776	0.500188	-3.49185	NO
Tox3	-1.45717	-2.88867	-2.3694	0.0292376	0.524572	-3.49566	NO
Smco2	-1.57463	-4.94835	-2.32957	0.0317087	0.529404	-3.49911	NO
Krt1	1.00156	-2.32457	2.34424	0.0307764	0.529404	-3.49954	NO
Fkbp3	-0.372455	5.68395	-2.85594	0.010519	0.404487	-3.49988	NO
Vwa3a	-1.8016	-3.47371	-2.34388	0.0307994	0.529404	-3.50406	NO
Deptor	-0.500391	4.26725	-2.75637	0.0130196	0.424124	-3.50505	NO
Evl	-0.612908	6.16727	-2.87749	0.0100423	0.395425	-3.50594	NO
Rab26	-0.527206	1.42953	-2.54001	0.0205551	0.475614	-3.50664	NO
Sapcd2	-0.433941	4.53932	-2.78801	0.0121689	0.419925	-3.50943	NO
Tmtc2	1.00958	1.19773	2.54524	0.0203322	0.474288	-3.51067	NO
Dnah9	1.34525	-4.21593	2.33331	0.0314682	0.529404	-3.51082	NO
Kctd8	-1.18323	-4.82616	-2.31996	0.0323331	0.530558	-3.51585	NO
Lrrc4c	-1.50963	-4.33255	-2.32464	0.0320274	0.529404	-3.51649	NO
Boll	-0.583323	-3.54227	-2.33056	0.0316447	0.529404	-3.51774	NO
Wfdc17	0.777907	2.62869	2.6079	0.0178305	0.451604	-3.5182	NO
Fgfr1	-0.487117	7.90292	-2.86193	0.0103844	0.400355	-3.51872	NO
Fezf1	1.58554	-3.26295	2.35223	0.03028	0.529404	-3.52439	NO
Asic4	-1.33564	-4.28861	-2.31905	0.0323927	0.530558	-3.52462	NO
Adcyap1	-0.6662	-1.52976	-2.37828	0.0287116	0.519554	-3.52716	NO
Cpne6	-0.96634	-5.32575	-2.29934	0.0337117	0.534106	-3.52789	NO
Gm10717	-1.57726	-3.3494	-2.33442	0.0313976	0.529404	-3.52913	NO
Caprin2	-0.557177	4.54106	-2.76603	0.012754	0.423717	-3.53475	NO
Olfr125	0.922661	-4.36143	2.31071	0.0329451	0.532921	-3.537	NO
Dnajc25	-0.291188	3.58112	-2.70499	0.0145236	0.428056	-3.53827	NO
Gdf3	0.682458	-0.329262	2.41831	0.0264494	0.509746	-3.54268	NO
Chac1	-0.575581	2.46469	-2.58389	0.0187525	0.460968	-3.54306	NO
Gckr	1.44581	-2.34115	2.35456	0.0301365	0.529404	-3.54707	NO
Tmem238l	1.89125	-2.77961	2.33616	0.0312867	0.529404	-3.54841	NO
Cbr2	0.913095	3.63837	2.68127	0.0152728	0.429557	-3.54849	NO
Samd13	1.22794	-2.30277	2.33679	0.0312467	0.529404	-3.5496	NO
Tspan12	1.05256	3.96391	2.72416	0.0139441	0.428056	-3.55186	NO
Krt23	1.83204	3.89764	2.71943	0.0140849	0.428056	-3.555	NO
Lipt2	-0.813731	1.53364	-2.55792	0.0198004	0.47081	-3.55725	NO
Med10	-0.278367	5.15796	-2.78367	0.0122823	0.419925	-3.56106	NO
Lrmda	0.625554	0.484126	2.45753	0.0243951	0.501697	-3.56455	NO
Rpgrip1	-1.15088	-2.721	-2.32173	0.0322169	0.530558	-3.56479	NO
Tepp	0.949918	-1.98952	2.35098	0.0303574	0.529404	-3.56575	NO
Rspo3	-1.79139	-0.360157	-2.42612	0.0260277	0.509562	-3.56751	NO
Gjd3	-1.21946	-4.89872	-2.27253	0.0355859	0.538985	-3.56754	NO
Cpt1b	0.796797	3.33199	2.66805	0.0157061	0.434301	-3.56767	NO
Slitrk5	1.48871	-4.54154	2.29197	0.0342181	0.534106	-3.56967	NO
Coq6	-0.630464	3.52063	-2.68906	0.015023	0.429557	-3.57083	NO
Sh3d21	-0.466171	4.64459	-2.76272	0.0128443	0.423717	-3.5768	NO
Edn2	-0.807142	2.1342	-2.5808	0.0188742	0.461417	-3.57905	NO
Msi2	0.456432	6.22204	2.82001	0.0113629	0.415309	-3.57908	NO
Tlr4	0.408865	4.31541	2.71316	0.014274	0.428056	-3.58058	NO
Nxpe2	1.22621	-4.92588	2.27607	0.0353332	0.538985	-3.58342	NO
Fance	-0.259206	5.06882	-2.75572	0.0130376	0.424124	-3.58388	NO
Gm14444	-1.45632	-5.04388	-2.2739	0.0354879	0.538985	-3.584	NO
Zbtb44	0.228198	6.23464	2.80474	0.0117409	0.418241	-3.58436	NO
Btf3	-0.283008	8.35561	-2.83467	0.011011	0.409543	-3.58574	NO
Olfr465-ps1	-1.39978	-2.80913	-2.31595	0.0325973	0.532447	-3.58842	NO
Syk	0.59896	4.3061	2.72507	0.0139171	0.428056	-3.59089	NO
Fstl4	0.738093	-3.01087	2.26928	0.0358197	0.538985	-3.59382	NO
Fam171a2	-0.454953	5.89435	-2.82758	0.0111798	0.411225	-3.59478	NO
Zg16	1.25725	-4.05598	2.28022	0.0350389	0.538943	-3.59682	NO
Serpina1c	-1.68933	-4.25824	-2.27823	0.0351796	0.538985	-3.60255	NO
Crip3	-1.63097	-4.3138	-2.27597	0.0353405	0.538985	-3.6034	NO
Hdc	0.843003	0.205269	2.4279	0.0259327	0.509562	-3.60635	NO
Gdnf	1.17526	-1.31715	2.36416	0.0295518	0.526371	-3.60742	NO
Lrpap1	-0.366779	5.94613	-2.80435	0.0117505	0.418241	-3.60878	NO
Kcnmb2	2.04142	2.85944	2.56964	0.0193207	0.464378	-3.61035	NO
Alox15	1.41086	3.39859	2.64999	0.0163174	0.43834	-3.61114	NO
Alkbh1	-0.580774	3.54927	-2.65959	0.0159899	0.434819	-3.61195	NO
Pcca	0.358192	3.258	2.61324	0.0176313	0.448869	-3.6131	NO
Ambp	1.67178	-2.68177	2.30953	0.0330241	0.532933	-3.61399	NO
Ldb3	1.16782	1.43679	2.46169	0.0241862	0.500188	-3.61478	NO
Kcng1	-1.72296	-4.59265	-2.26138	0.0363939	0.540636	-3.6155	NO
Pkhd1l1	1.62992	0.468269	2.42664	0.0259997	0.509562	-3.61964	NO
Nt5c1b	-1.0609	-5.29492	-2.23341	0.0384947	0.552965	-3.6264	NO
Lpin2	-0.303692	5.23026	-2.75459	0.013069	0.424124	-3.62732	NO
Sall3	1.30922	-4.86548	2.24464	0.037638	0.547549	-3.62781	NO
Erc2	1.34476	-4.28838	2.25358	0.0369689	0.54425	-3.62818	NO
Tbxas1	0.957587	1.18653	2.47872	0.0233489	0.497502	-3.6288	NO
Arfgap1	-0.324475	4.96984	-2.74682	0.0132873	0.424638	-3.63118	NO
Olfr39	-0.703039	-1.55797	-2.32485	0.0320137	0.529404	-3.63307	NO
Slc9a3	1.55331	-3.94251	2.26341	0.0362455	0.54033	-3.63588	NO
Abcb4	1.30652	0.890547	2.43768	0.0254152	0.508181	-3.64371	NO
Krt84	1.83402	-3.81608	2.25168	0.0371102	0.544363	-3.64624	NO
Mboat2	-0.437476	4.73332	-2.7115	0.0143244	0.428056	-3.65017	NO
Adrb2	0.869543	1.75095	2.50335	0.0221857	0.488945	-3.65139	NO
Ntf3	1.09955	-3.27285	2.23876	0.0380841	0.551864	-3.65199	NO
Actc1	-2.0821	-2.82503	-2.27968	0.035077	0.538966	-3.65505	NO
Car14	0.833869	-1.78294	2.29378	0.0340928	0.534106	-3.65645	NO
Nkx2-1	1.86576	-4.5762	2.2297	0.0387819	0.554897	-3.65847	NO
Nupr1l	-0.54	0.432741	-2.38068	0.0285713	0.518284	-3.66022	NO
Aox2	1.44209	-3.29364	2.2707	0.0357176	0.538985	-3.66062	NO
Col18a1	-0.635299	7.17085	-2.78977	0.0121231	0.419925	-3.6617	NO
Plvap	-0.873248	5.37981	-2.7795	0.0123922	0.421622	-3.66779	NO
BC034090	-0.84389	2.39287	-2.5114	0.0218178	0.485182	-3.66917	NO
Mettl8	-0.417464	3.51791	-2.6215	0.0173274	0.444194	-3.67056	NO
Adtrp	1.49288	-1.85803	2.28257	0.034873	0.538071	-3.67083	NO
Rtn4	0.252622	7.96754	2.81482	0.01149	0.416509	-3.6718	NO
Txnrd2	-0.430864	2.48884	-2.54136	0.0204975	0.475142	-3.67647	NO
Prps1l3	-0.352457	4.76297	-2.71201	0.0143087	0.428056	-3.6767	NO
Cdh16	-0.954796	-2.12974	-2.2974	0.0338442	0.534106	-3.67927	NO
Hs3st3a1	1.00062	0.756763	2.39643	0.0276644	0.51299	-3.68042	NO
Smpx	2.08441	-3.0966	2.23998	0.0379914	0.551603	-3.68063	NO
Ccdc112	-0.402068	3.73723	-2.62627	0.0171543	0.443241	-3.68176	NO
Pea15a	-0.407368	7.52164	-2.78355	0.0122855	0.419925	-3.68736	NO
Ttc23l	1.2675	-3.99639	2.22363	0.039255	0.557044	-3.68881	NO
Pcdhga2	-0.856864	0.155686	-2.3675	0.0293514	0.525492	-3.69285	NO
Shd	-0.745834	-0.865189	-2.3239	0.0320753	0.529404	-3.69354	NO
Xkr6	1.24306	-4.49995	2.20758	0.0405333	0.560933	-3.69638	NO
Gss	-0.436923	4.35239	-2.69103	0.0149604	0.429557	-3.6966	NO
Chia1	2.86667	-1.88669	2.24783	0.0373977	0.545383	-3.6968	NO
Siva1	-0.46472	5.47205	-2.76765	0.0127098	0.423717	-3.69812	NO
Smox	-0.480503	6.64869	-2.7708	0.0126247	0.423717	-3.7021	NO
Abt1	-0.307646	4.8396	-2.70697	0.0144627	0.428056	-3.70236	NO
Cfap157	-0.484158	1.11193	-2.40908	0.0269554	0.51018	-3.70237	NO
Galnt6	0.722182	1.87191	2.4509	0.0247315	0.503705	-3.70443	NO
Slc7a14	-0.544564	-0.369921	-2.33378	0.0314385	0.529404	-3.70586	NO
Gm7030	1.23483	-2.20954	2.27115	0.0356852	0.538985	-3.70914	NO
Nppc	0.926465	-2.12536	2.26863	0.0358668	0.538985	-3.71072	NO
Asb15	1.38148	-3.586	2.20294	0.0409103	0.561485	-3.71177	NO
Abhd12	-0.494851	4.50318	-2.6736	0.0155228	0.434108	-3.71327	NO
Slc27a6	-1.38762	0.634639	-2.40373	0.0272532	0.510752	-3.71432	NO
Ambn	-0.563125	-5.41247	-2.15382	0.0450988	0.57448	-3.71512	NO
Eef1a2	2.45605	-1.73007	2.26401	0.0362022	0.54033	-3.71646	NO
Samd15	-0.952817	-1.17563	-2.30971	0.0330118	0.532933	-3.71844	NO
L2hgdh	-0.502331	3.76932	-2.61387	0.0176082	0.448869	-3.72704	NO
Ctnnbip1	-0.253271	6.86624	-2.76351	0.0128228	0.423717	-3.72814	NO
Mrgprb3	-1.27516	-4.68272	-2.17479	0.0432649	0.565894	-3.73082	NO
Tub	-0.765044	-1.17822	-2.28524	0.0346861	0.53715	-3.73164	NO
Ccl17	-1.02591	-0.694629	-2.30718	0.0331815	0.532962	-3.73326	NO
Nrarp	-0.694517	4.71873	-2.71057	0.0143526	0.428056	-3.73414	NO
Vmn1r19	-1.19713	-3.79054	-2.19892	0.041239	0.562258	-3.7348	NO
Gng10	-0.559559	3.10921	-2.53153	0.020922	0.476007	-3.73648	NO
Ehhadh	0.448693	2.8811	2.5349	0.0207754	0.476007	-3.73649	NO
Dnlz	-0.319855	4.82297	-2.70791	0.0144338	0.428056	-3.73661	NO
Aatk	-0.834379	3.78757	-2.6244	0.0172221	0.443241	-3.73848	NO
Mrpl14	-0.321974	4.71492	-2.70568	0.0145023	0.428056	-3.73861	NO
Uhrf1	-0.195386	8.83118	-2.7476	0.0132653	0.424638	-3.7406	NO
Abitram	-0.257349	4.65636	-2.64812	0.0163817	0.43834	-3.74101	NO
Adora2b	0.546984	-0.584312	2.30627	0.0332425	0.532962	-3.74239	NO
Tmprss3	-1.1355	-4.66524	-2.16711	0.0439285	0.570491	-3.74324	NO
Tpsg1	-0.543507	-5.37605	-2.14487	0.0459029	0.57448	-3.7458	NO
Cdh6	-0.590147	-1.25701	-2.26199	0.0363496	0.540521	-3.74597	NO
Traf3ip3	-0.455606	0.397237	-2.31129	0.0329064	0.532921	-3.74635	NO
Elfn2	-0.988111	-5.29711	-2.16362	0.0442326	0.57197	-3.74694	NO
Ly6h	-0.802168	0.944471	-2.37629	0.0288291	0.520346	-3.74701	NO
Ttn	1.81464	2.87346	2.50147	0.0222724	0.488945	-3.74811	NO
Bpifa2	4.16633	-1.00592	2.26231	0.0363258	0.540521	-3.74933	NO
Kif17	-1.06234	-1.42202	-2.26496	0.0361329	0.54033	-3.75366	NO
Olfr1351	-0.974981	-3.67212	-2.18524	0.042376	0.565218	-3.75506	NO
Abca4	-1.16196	-1.07593	-2.27516	0.0353986	0.538985	-3.75651	NO
Pbdc1	-0.345379	6.32182	-2.77058	0.0126306	0.423717	-3.75757	NO
Svbp	-0.289592	4.64594	-2.68326	0.0152085	0.429557	-3.75907	NO
Ppm1n	-1.79863	-4.66139	-2.16746	0.0438978	0.570491	-3.75998	NO
Setd4	0.702453	1.49606	2.40932	0.0269426	0.51018	-3.76214	NO
Tmem217	-0.893214	-3.51759	-2.17552	0.0432015	0.565894	-3.76618	NO
Hbb-bs	1.82849	5.74934	2.73335	0.0136739	0.428056	-3.76781	NO
Otud5	-0.323434	7.54039	-2.74892	0.013228	0.424638	-3.76817	NO
Fam193a	-0.250624	6.29082	-2.71202	0.0143084	0.428056	-3.76821	NO
Coq4	-0.467441	2.97253	-2.51899	0.0214758	0.482665	-3.77109	NO
Vwa5b2	-1.03986	-2.89782	-2.16314	0.0442748	0.57197	-3.77497	NO
Gm10800	1.13343	-2.09001	2.20195	0.0409912	0.561485	-3.78331	NO
Klk1b27	1.30774	-3.81449	2.17647	0.0431202	0.565894	-3.78523	NO
Slc45a3	0.563813	4.14314	2.5834	0.0187716	0.460968	-3.78532	NO
Add2	-0.880899	0.491378	-2.34712	0.0305965	0.529404	-3.78541	NO
Arhgef3	0.556728	5.94757	2.72834	0.0138207	0.428056	-3.78735	NO
Lamb1	-0.826876	7.07033	-2.75753	0.0129872	0.424124	-3.79154	NO
Tmem41b	0.222756	5.80835	2.6827	0.0152267	0.429557	-3.79363	NO
Selp	2.29912	-2.22487	2.21678	0.0397958	0.557518	-3.79393	NO
Nutf2	-0.561461	3.89991	-2.59325	0.0183877	0.457862	-3.7943	NO
Rundc3a	-0.840621	1.88442	-2.4222	0.0262383	0.509746	-3.79769	NO
Gm21762	1.622	-4.33058	2.14446	0.0459398	0.57448	-3.79804	NO
Lrit2	0.777659	-2.77541	2.19404	0.0416413	0.564274	-3.79819	NO
Ssrp1	-0.403286	8.06209	-2.72345	0.0139649	0.428056	-3.7984	NO
Kremen1	0.375081	5.32473	2.69626	0.0147953	0.429557	-3.79991	NO
Tjp1	0.252843	7.19055	2.71819	0.0141222	0.428056	-3.80193	NO
Gm614	-1.75941	-3.03293	-2.18005	0.0428154	0.565894	-3.80254	NO
Dnd1	-1.37256	-0.480751	-2.26898	0.0358417	0.538985	-3.80359	NO
Tnnc2	3.06011	1.02464	2.34434	0.0307702	0.529404	-3.80364	NO
Cd80	1.73311	3.7074	2.57066	0.0192797	0.464378	-3.80495	NO
Tnfrsf8	-0.59748	-5.12997	-2.0748	0.052665	0.593627	-3.80667	NO
Arpc5l	-0.207123	6.14342	-2.70553	0.014507	0.428056	-3.80712	NO
Olfr916	0.877446	-2.19178	2.20665	0.0406085	0.561345	-3.8087	NO
Tnni2	2.27029	4.89919	2.63941	0.0166859	0.441708	-3.81036	NO
Pgm5	1.83954	0.693695	2.28931	0.0344021	0.535581	-3.816	NO
Zfp988	-0.914814	-1.41843	-2.20992	0.0403447	0.559792	-3.82971	NO
Fitm1	1.35923	-1.72631	2.18039	0.0427861	0.565894	-3.83381	NO
Adam23	-3.10319	-1.6477	-2.21575	0.0398779	0.557683	-3.83538	NO
Psmc1	-0.340844	6.74636	-2.71876	0.014105	0.428056	-3.8363	NO
Krt78	0.674892	-2.39066	2.14466	0.0459221	0.57448	-3.84108	NO
Qdpr	-0.259656	4.46103	-2.60196	0.0180545	0.45269	-3.84232	NO
Nps	-1.10238	-3.5529	-2.12952	0.047312	0.575981	-3.84481	NO
Cad	-0.32633	6.46036	-2.72403	0.0139478	0.428056	-3.84564	NO
Taf11	-0.213241	5.11199	-2.66001	0.0159754	0.434819	-3.84725	NO
Ltb4r1	1.09329	0.445475	2.30645	0.0332303	0.532962	-3.84738	NO
Shisal1	1.34427	-2.79217	2.14497	0.0458932	0.57448	-3.84767	NO
Wdr72	1.7615	-2.21844	2.1768	0.0430921	0.565894	-3.84955	NO
Sec24d	0.38283	5.08638	2.66148	0.0159262	0.434819	-3.85191	NO
Icosl	-0.327324	3.23377	-2.50676	0.022029	0.487677	-3.85283	NO
Aass	2.09993	0.349138	2.29621	0.0339259	0.534106	-3.85604	NO
BC005624	-0.219736	5.244	-2.62484	0.017206	0.443241	-3.85671	NO
Lrfn3	-0.877889	-0.00485779	-2.25431	0.0369145	0.543992	-3.85702	NO
Cachd1	-0.495668	4.66154	-2.63242	0.0169334	0.442113	-3.85801	NO
Slc7a4	1.4027	-0.51391	2.26721	0.0359696	0.539215	-3.85869	NO
Csn1s2b	1.14612	-3.80551	2.09563	0.050566	0.584239	-3.86002	NO
Olfr683	0.603864	-5.13227	2.09007	0.0511184	0.587087	-3.86089	NO
Gm9803	0.979096	2.70541	2.43106	0.0257645	0.509562	-3.8613	NO
Grifin	-1.65427	-4.3295	-2.10687	0.0494645	0.581216	-3.86977	NO
Saa3	1.21884	1.90965	2.39002	0.02803	0.514656	-3.86978	NO
AI182371	-1.19697	-0.713916	-2.21287	0.0401081	0.558771	-3.87255	NO
Btbd6	-0.488582	4.80447	-2.6337	0.0168878	0.442113	-3.87497	NO
Trpc5	-1.49101	-4.07604	-2.11548	0.0486358	0.580094	-3.87625	NO
Nav2	0.498248	6.65473	2.70718	0.0144564	0.428056	-3.87709	NO
Eya1	1.64837	0.276827	2.27326	0.0355341	0.538985	-3.87722	NO
Foxl1	-0.751111	-1.64987	-2.15673	0.0448394	0.574239	-3.87756	NO
Dnhd1	0.475645	1.68913	2.37073	0.0291581	0.523781	-3.8818	NO
Crtam	-0.911816	-2.89615	-2.13595	0.046717	0.575981	-3.88297	NO
Trmt61a	-0.332539	2.92433	-2.45664	0.0244404	0.501929	-3.88442	NO
Cav3	2.36657	-3.09713	2.12312	0.0479115	0.577049	-3.88636	NO
Xpot	-0.227761	5.80076	-2.64596	0.0164569	0.438632	-3.88962	NO
Myl1	3.86456	0.304092	2.2476	0.0374152	0.545383	-3.88991	NO
Vmn1r215	-0.7457	-2.07953	-2.14698	0.0457115	0.57448	-3.89094	NO
Olfr959	0.735062	-2.41643	2.14783	0.0456353	0.57448	-3.89257	NO
Fgfrl1	-0.380679	6.4881	-2.69202	0.0149288	0.429557	-3.8964	NO
Lpar5	1.09581	0.116342	2.25011	0.037227	0.545095	-3.89784	NO
Sgsm2	0.453467	5.23111	2.65295	0.0162157	0.438245	-3.89853	NO
Olfr305	1.21289	-4.54229	2.07025	0.0531336	0.594654	-3.8997	NO
Nr0b2	-0.936326	-5.13227	-2.06217	0.0539756	0.595965	-3.90142	NO
Ctnnbl1	-0.380662	5.16321	-2.63004	0.0170186	0.443203	-3.90173	NO
Speg	1.1445	2.74264	2.42957	0.0258436	0.509562	-3.90471	NO
Pax3	2.6019	-1.3216	2.20604	0.0406582	0.561345	-3.90579	NO
Slc9a5	-0.666723	2.70908	-2.4085	0.0269877	0.51018	-3.90641	NO
Zfp105	1.24216	1.45174	2.32598	0.0319404	0.529404	-3.907	NO
Capn3	1.18007	0.077346	2.21957	0.039575	0.557518	-3.90705	NO
Cth	0.794983	1.21231	2.31897	0.0323982	0.530558	-3.90832	NO
Cd72	0.415626	4.28305	2.55474	0.0199323	0.472778	-3.90853	NO
Zfp128	0.518225	0.758961	2.28477	0.0347189	0.53715	-3.9087	NO
Styxl1	0.535206	-1.26552	2.17313	0.0434068	0.567208	-3.90969	NO
Gm9195	1.38225	-5.02914	2.07001	0.0531589	0.594654	-3.91083	NO
Tmod4	0.824451	3.43418	2.4698	0.0237843	0.499024	-3.91629	NO
Olfr417	-0.785595	-2.47455	-2.14214	0.0461507	0.57448	-3.91647	NO
Lrat	0.897073	-0.746889	2.19806	0.04131	0.562258	-3.91887	NO
Lingo2	-0.579762	-5.17439	-1.99384	0.0615926	0.608004	-3.92048	NO
Zfp598	-0.223596	7.16705	-2.65026	0.0163081	0.43834	-3.9209	NO
Flrt1	-0.807003	-0.805613	-2.18909	0.0420531	0.565218	-3.92142	NO
Agmat	0.691369	-3.67149	2.07662	0.0524778	0.592422	-3.92199	NO
Exoc3l4	-0.943892	0.834015	-2.27033	0.0357443	0.538985	-3.92269	NO
Idh1	-0.32062	5.57115	-2.63713	0.0167662	0.442113	-3.9249	NO
Ehd3	-1.16733	3.24732	-2.48212	0.0231849	0.495638	-3.92768	NO
Smc1a	-0.285255	8.34775	-2.68413	0.0151806	0.429557	-3.92848	NO
Rsph3a	-0.272377	4.80915	-2.61736	0.0174791	0.446533	-3.92902	NO
Adra2c	2.016	-2.64398	2.10126	0.0500111	0.581273	-3.93371	NO
Alkbh7	-0.389505	3.4213	-2.48983	0.0228173	0.491926	-3.93788	NO
Cd300c	-1.01806	-5.03108	-2.04063	0.0562798	0.601758	-3.93827	NO
Bdh2	1.47109	-4.34842	2.05488	0.0547454	0.598128	-3.93925	NO
Naaladl2	0.633724	4.0803	2.54827	0.0202039	0.473989	-3.93937	NO
Olfr229	-1.1833	-4.57219	-2.04742	0.055544	0.600273	-3.94063	NO
Akr1c19	-0.730668	-2.32909	-2.08995	0.0511305	0.587087	-3.9421	NO
Arrdc1	-0.321384	6.28125	-2.67085	0.0156134	0.434176	-3.9429	NO
H2-Q6	0.920532	7.19352	2.66069	0.0159527	0.434819	-3.94401	NO
Sesn2	-0.466127	4.64524	-2.58955	0.0185311	0.460656	-3.94407	NO
H60b	0.997392	-1.5374	2.15282	0.0451875	0.57448	-3.9441	NO
Sdhaf3	0.359021	2.54482	2.37224	0.0290684	0.522806	-3.94462	NO
Tbcc	-0.283717	4.227	-2.54733	0.0202436	0.473989	-3.95436	NO
Necab2	-1.5281	-4.01547	-2.06191	0.0540025	0.595965	-3.95477	NO
Nphs1	1.06623	-4.99133	2.02479	0.0580304	0.60607	-3.95851	NO
Pdk3	-0.200458	5.746	-2.60663	0.0178782	0.451643	-3.95938	NO
Cyp2d10	1.4736	0.9237	2.28486	0.0347126	0.53715	-3.96138	NO
Araf	-0.217579	6.5465	-2.65426	0.016171	0.438158	-3.96363	NO
Atp6v1a	0.480968	6.91975	2.67129	0.0155989	0.434176	-3.96614	NO
Fhl4	0.790264	-1.48625	2.12499	0.0477355	0.575981	-3.96995	NO
Uck1	-0.412816	5.51836	-2.63548	0.0168246	0.442113	-3.97129	NO
Fam83b	0.695725	3.40505	2.46434	0.0240544	0.500188	-3.97282	NO
Gm17304	1.00343	-5.09348	2.01828	0.058764	0.60607	-3.97284	NO
Gm10320	1.15869	-3.30636	2.07157	0.0529974	0.594198	-3.97322	NO
Selenov	1.22957	-4.592	2.05262	0.0549864	0.598128	-3.97364	NO
Slc22a21	-0.465247	2.00928	-2.3237	0.0320883	0.529404	-3.97572	NO
Jade3	-0.257659	4.97865	-2.55839	0.0197809	0.47081	-3.97806	NO
Prss50	0.896925	-1.80256	2.07911	0.052224	0.590911	-3.98162	NO
B4galt7	-0.291102	5.12096	-2.56518	0.0195021	0.466722	-3.98181	NO
Art3	1.03516	1.67163	2.2993	0.0337147	0.534106	-3.985	NO
Hoxa10	2.00785	-4.49448	2.03019	0.0574284	0.60607	-3.98649	NO
Vmn2r93	-0.476107	-0.530147	-2.1337	0.0469249	0.575981	-3.98652	NO
Cpd	0.299979	7.48057	2.64799	0.0163865	0.43834	-3.98778	NO
Gm2026	-1.38318	-2.44754	-2.10589	0.0495601	0.581216	-3.98843	NO
Lilrb4a	0.791965	2.94522	2.41353	0.0267101	0.51018	-3.98868	NO
Tuba3a	1.07906	-3.97845	2.03616	0.0567685	0.603032	-3.99053	NO
Abcc12	-1.40579	-2.37469	-2.10614	0.0495354	0.581216	-3.99157	NO
Ms4a14	0.442149	2.4029	2.35528	0.0300924	0.529404	-3.99279	NO
Gabrp	0.781133	8.11619	2.66927	0.0156657	0.434301	-3.99305	NO
Ublcp1	0.332134	3.58106	2.48364	0.0231119	0.495638	-3.99379	NO
Fads2	-0.44973	6.1655	-2.61995	0.0173842	0.444878	-3.99396	NO
Ppp2r1a	-0.291525	8.24285	-2.66354	0.0158567	0.434819	-3.99596	NO
Atp2b1	0.430809	8.01862	2.66674	0.0157498	0.434695	-3.99853	NO
Gm12886	1.19942	-1.92625	2.11347	0.0488289	0.580521	-4.00061	NO
Dhx29	-0.245126	4.83741	-2.54947	0.0201531	0.473989	-4.00275	NO
Alcam	0.652197	7.01559	2.64277	0.0165678	0.44	-4.00388	NO
Lyrm4	-0.351467	4.04615	-2.49304	0.022666	0.491487	-4.00451	NO
Zfp993	-0.507475	-0.311261	-2.15146	0.0453091	0.57448	-4.00681	NO
Ccdc81	-1.56826	-4.25049	-2.03022	0.0574244	0.60607	-4.00796	NO
Wipi2	-0.178096	7.26382	-2.61022	0.0177436	0.450174	-4.00819	NO
Slco1a4	-0.935935	-4.79984	-1.99621	0.0613127	0.608004	-4.00958	NO
Tedc1	-0.552531	4.37096	-2.53006	0.0209861	0.476007	-4.01064	NO
Tnnt3	2.97918	2.08819	2.30657	0.0332224	0.532962	-4.01296	NO
Slc6a2	1.13675	1.87236	2.29397	0.0340802	0.534106	-4.01848	NO
Syce1	-1.01928	-5.10672	-1.98724	0.0623769	0.608004	-4.01899	NO
Csta3	1.02564	-5.18192	1.97571	0.0637697	0.611047	-4.02104	NO
Fbxw14	0.923731	-4.61645	2.00279	0.060543	0.608004	-4.02162	NO
Scn1a	1.00713	-4.87763	1.97363	0.0640242	0.611705	-4.02428	NO
Rnf125	1.0234	1.38709	2.25752	0.036677	0.542552	-4.02437	NO
Fam81a	0.752205	2.10816	2.23193	0.038609	0.554033	-4.025	NO
L1td1	0.720945	-1.03214	2.1317	0.0471101	0.575981	-4.02521	NO
Scgb3a1	0.847695	-1.99069	2.07716	0.0524232	0.592258	-4.03017	NO
Mtmr6	0.488532	5.21589	2.58285	0.0187933	0.460968	-4.03211	NO
Sugct	-0.663159	-0.557884	-2.12493	0.0477419	0.575981	-4.03331	NO
Olfr628	0.65281	-1.25427	2.11586	0.0485995	0.580094	-4.03374	NO
Mta1	-0.464418	6.93709	-2.63361	0.0168911	0.442113	-4.0338	NO
Fam178b	-2.56297	-2.81119	-2.05152	0.0551035	0.598128	-4.03901	NO
Olfr982	-0.777169	-4.01728	-1.98966	0.0620887	0.608004	-4.03969	NO
Alg3	0.415733	3.77079	2.43267	0.0256791	0.509562	-4.04173	NO
Olfr6	0.489321	-1.4157	2.0939	0.0507371	0.5853	-4.04248	NO
Olfr624	-0.269522	4.97718	-2.53938	0.0205822	0.475614	-4.0434	NO
Saal1	-0.305036	3.41785	-2.38934	0.028069	0.514656	-4.04363	NO
Gm11444	0.686385	-3.08384	2.01012	0.0596946	0.608004	-4.04429	NO
Gm826	-0.657368	-2.22543	-2.04272	0.0560523	0.601503	-4.0478	NO
Olfr695	0.545599	-1.23241	2.08689	0.0514372	0.587866	-4.04872	NO
Papln	-0.842199	2.04547	-2.28584	0.0346437	0.53715	-4.049	NO
Mterf1a	-0.385273	3.1663	-2.3846	0.0283432	0.516901	-4.04971	NO
Lingo1	-1.36109	0.400363	-2.18269	0.0425918	0.565218	-4.05085	NO
Hoxa9	1.89634	-2.57783	2.02512	0.0579932	0.60607	-4.05129	NO
Bpi	-0.537767	-5.37125	-1.92841	0.0697779	0.622169	-4.05598	NO
Preb	-0.292945	6.50146	-2.6061	0.017898	0.451643	-4.05662	NO
Nlrp2	1.83679	-3.55799	1.99697	0.0612238	0.608004	-4.05725	NO
Nhej1	-0.342213	3.2076	-2.39965	0.027482	0.51299	-4.05781	NO
Matk	-1.27422	-0.0714899	-2.17968	0.0428466	0.565894	-4.05794	NO
Vegfd	0.618581	0.447503	2.14874	0.0455536	0.57448	-4.05937	NO
Echdc2	-0.72084	3.96264	-2.45147	0.0247024	0.503705	-4.06433	NO
Stpg1	-0.563238	-1.67252	-2.06221	0.0539718	0.595965	-4.06635	NO
Ccnk	-0.365505	5.49502	-2.56913	0.0193412	0.464378	-4.06641	NO
Zfp990	-1.66124	-3.41422	-2.01155	0.0595313	0.608004	-4.0665	NO
Isg20	-0.721026	4.54114	-2.52074	0.0213975	0.482374	-4.06819	NO
Apol7c	-0.545669	-5.34178	-1.92929	0.0696607	0.622169	-4.06858	NO
Nprl3	0.433528	2.7812	2.34347	0.0308247	0.529404	-4.069	NO
Plekha5	-0.614796	5.75032	-2.53202	0.0209007	0.476007	-4.06986	NO
Cryz	-0.257376	4.35116	-2.46867	0.0238399	0.499024	-4.0715	NO
Far1	0.206839	7.36546	2.58417	0.0187412	0.460968	-4.07193	NO
Mrps18a	-0.311138	5.26039	-2.5516	0.0200636	0.473989	-4.07251	NO
Zfat	-0.269159	3.94239	-2.47188	0.023682	0.499024	-4.07739	NO
Ncoa1	-0.492208	5.23176	-2.55233	0.0200332	0.473989	-4.07958	NO
Zmynd19	-0.267447	5.98651	-2.57699	0.0190257	0.462099	-4.08308	NO
Clec5a	0.726059	0.694903	2.17171	0.0435297	0.567809	-4.08388	NO
Olfr837	0.920172	-4.64879	1.95978	0.0657399	0.613989	-4.08429	NO
Vcl	0.462689	7.46804	2.6032	0.0180074	0.45269	-4.08539	NO
Arl13a	0.856063	-4.39256	1.95135	0.0668035	0.616016	-4.08774	NO
Zfp974	0.302529	2.91626	2.33104	0.0316142	0.529404	-4.0886	NO
Gpc3	-0.644846	2.83391	-2.31179	0.032873	0.532921	-4.08945	NO
Serpinb8	0.75985	2.90553	2.3317	0.0315717	0.529404	-4.09017	NO
Pla1a	0.503037	3.60959	2.42614	0.0260267	0.509562	-4.09269	NO
Ccnjl	0.824542	1.46827	2.22792	0.0389201	0.555768	-4.0938	NO
Vmn1r66	-0.516113	-5.13074	-1.89689	0.0740554	0.627458	-4.0939	NO
Nell2	1.92111	-3.63147	1.97656	0.0636663	0.610849	-4.09504	NO
Lrig1	0.24023	7.39131	2.5385	0.0206202	0.475748	-4.09524	NO
Adamtsl5	-2.31659	-1.89162	-2.02458	0.0580537	0.60607	-4.098	NO
Serpine2	0.379613	8.58102	2.51145	0.0218153	0.485182	-4.09805	NO
Vrk1	-0.329414	5.94335	-2.56612	0.0194635	0.466556	-4.09861	NO
Adam3	1.16739	-5.25279	1.94074	0.0681642	0.616191	-4.09893	NO
Setbp1	-0.664609	4.6314	-2.48513	0.0230407	0.495225	-4.09894	NO
B3galt6	-0.255186	4.44416	-2.45993	0.0242745	0.50131	-4.09906	NO
Plpp7	1.0805	-0.697567	2.08054	0.0520782	0.590166	-4.102	NO
Itpr2	-0.951112	5.59891	-2.54646	0.0202804	0.473989	-4.1024	NO
Cstf1	-0.267427	5.51887	-2.54175	0.0204809	0.475142	-4.10748	NO
Ccdc96	0.465324	1.64719	2.23338	0.0384971	0.552965	-4.10824	NO
Tmem219	0.254277	3.87923	2.41687	0.0265276	0.509746	-4.10908	NO
Olfr1404	-1.1826	-4.75334	-1.94572	0.0675221	0.616016	-4.10986	NO
Kif26a	1.40398	4.46263	2.4283	0.0259112	0.509562	-4.11062	NO
E2f6	-0.43771	3.01385	-2.30013	0.0336581	0.534106	-4.113	NO
Syt1	-1.42773	-4.67021	-1.93182	0.0693274	0.620562	-4.11313	NO
Paqr4	-0.363743	6.83327	-2.58351	0.0187674	0.460968	-4.11346	NO
Vmn1r78	0.700753	-2.58257	1.95185	0.0667399	0.616016	-4.11617	NO
Magix	-1.28104	-0.504179	-2.09248	0.0508783	0.586013	-4.11772	NO
Miga2	-0.269878	4.98469	-2.50319	0.0221929	0.488945	-4.12111	NO
Fbxo48	0.421419	1.76642	2.25625	0.0367712	0.542963	-4.12256	NO
P2rx6	1.51855	-1.65008	2.04297	0.0560253	0.601503	-4.1234	NO
Gpsm3	-0.322847	5.07406	-2.506	0.0220639	0.487718	-4.12553	NO
Mill1	1.57114	-4.26924	1.94314	0.0678549	0.616016	-4.1292	NO
Luzp2	1.06292	-3.57602	1.93469	0.0689519	0.619686	-4.12996	NO
Gm266	-1.60953	-1.00116	-2.06611	0.0535632	0.595965	-4.13078	NO
Tmem100	1.44897	2.24131	2.25254	0.037046	0.544363	-4.13205	NO
Muc13	0.905962	-0.670495	2.05527	0.0547045	0.598128	-4.13521	NO
Zfp777	-0.254838	5.68727	-2.47258	0.0236477	0.499024	-4.13574	NO
Gdf9	0.598124	-1.4315	2.02789	0.0576836	0.60607	-4.13754	NO
Axin2	0.564965	1.00879	2.16038	0.044517	0.57285	-4.14266	NO
Olfr1295	-0.7235	-2.68865	-1.97597	0.0637383	0.611047	-4.14354	NO
Ephb2	-0.440786	4.69063	-2.44684	0.0249397	0.505415	-4.14357	NO
Ush2a	-0.464078	-5.45882	-1.86288	0.0789312	0.637232	-4.14415	NO
Gm21970	-0.464291	-5.44991	-1.86243	0.0789981	0.637424	-4.145	NO
Selenok	0.429887	4.58347	2.47356	0.0235998	0.499024	-4.14651	NO
Lactb2	0.454864	4.24907	2.46276	0.0241328	0.500188	-4.14871	NO
Chrm2	1.92659	-3.10702	1.94171	0.0680387	0.616016	-4.14913	NO
Vmn1r74	-0.515048	-1.02711	-2.04368	0.0559483	0.601261	-4.14925	NO
Ttc41	0.362825	0.858168	2.14222	0.0461435	0.57448	-4.14937	NO
Tmem221	-0.489684	1.07061	-2.1899	0.0419861	0.565218	-4.15324	NO
Ppp1r27	1.73321	-2.46252	1.98019	0.0632261	0.609628	-4.15328	NO
Dnah7a	-0.944965	-2.76777	-1.97783	0.0635113	0.610154	-4.15369	NO
Ercc6l2	0.468905	-1.2588	2.01027	0.059678	0.608004	-4.15589	NO
Kcnip2	0.45318	0.142186	2.08914	0.0512112	0.587091	-4.15985	NO
Gm45194	-1.46284	-4.84707	-1.89213	0.0747216	0.62836	-4.16244	NO
Il24	0.903954	1.14218	2.18382	0.0424961	0.565218	-4.16364	NO
Gck	0.962369	-0.667647	2.03768	0.0566016	0.603032	-4.16768	NO
Tbc1d2	-0.509142	3.8325	-2.40398	0.027239	0.510752	-4.16796	NO
Endou	-0.606074	-2.13257	-1.96806	0.0647085	0.611923	-4.16857	NO
Vmn1r75	-0.473459	0.0834301	-2.07097	0.0530589	0.594437	-4.17053	NO
Dlst	-0.33077	5.94851	-2.5102	0.0218721	0.485415	-4.17059	NO
Mup13	-0.459322	-5.56463	-1.84548	0.0815341	0.64548	-4.1709	NO
Usp25	0.36713	6.80788	2.5463	0.0202872	0.473989	-4.1713	NO
Duox1	0.579838	3.05573	2.2955	0.0339746	0.534106	-4.17169	NO
Arl6ip4	-0.25682	6.68625	-2.5012	0.022285	0.488945	-4.1722	NO
Ufsp2	0.282805	4.98183	2.47187	0.0236824	0.499024	-4.17328	NO
Olfr403	-0.797113	-2.7268	-1.94962	0.0670242	0.616016	-4.17489	NO
Ttc16	-0.559391	-0.911786	-2.05358	0.0548843	0.598128	-4.17557	NO
Dnali1	1.28773	-2.20275	1.99417	0.0615532	0.608004	-4.17562	NO
Dzip1	0.980712	4.24944	2.38249	0.0284657	0.517004	-4.17592	NO
Crispld1	1.49251	0.993196	2.12847	0.0474103	0.575981	-4.17719	NO
Kctd19	1.00571	-5.07377	1.87219	0.0775696	0.633778	-4.17769	NO
Gm7075	-0.826681	-4.1673	-1.87536	0.0771103	0.633778	-4.17816	NO
Cox6a2	1.93629	-1.06182	2.02392	0.0581279	0.60607	-4.17958	NO
Atp2a1	2.71222	2.90485	2.26793	0.0359178	0.538985	-4.18343	NO
Olfr1012	-0.89908	-0.450995	-2.01612	0.0590089	0.60607	-4.18405	NO
Tmem63c	-1.24257	-3.68816	-1.9199	0.07091	0.622874	-4.18802	NO
Prrt2	-0.669152	1.50821	-2.18588	0.0423225	0.565218	-4.19025	NO
Ercc6l	-0.302886	6.09019	-2.54982	0.0201383	0.473989	-4.19183	NO
Scarb1	-0.373618	6.90795	-2.55905	0.0197537	0.47081	-4.1937	NO
Nobox	-1.38596	-4.27276	-1.88724	0.0754113	0.630891	-4.1963	NO
Pianp	0.838903	5.94595	2.50972	0.021894	0.485415	-4.19742	NO
Pof1b	0.574805	5.7826	2.48189	0.0231962	0.495638	-4.19792	NO
Sgcd	1.027	-2.69832	1.88515	0.0757075	0.63195	-4.19963	NO
Ube2v1	-0.342733	7.38595	-2.53097	0.0209463	0.476007	-4.20125	NO
Mplkip	-0.291405	4.61628	-2.44339	0.0251177	0.507169	-4.20248	NO
Hpcal1	-0.436148	5.1846	-2.49208	0.0227111	0.491583	-4.20445	NO
Glb1l2	1.51747	-0.222449	2.03726	0.0566476	0.603032	-4.20607	NO
Bmp15	0.752957	-1.70174	1.98403	0.0627623	0.608234	-4.20694	NO
Slc25a27	-0.282943	4.58392	-2.43359	0.0256304	0.509365	-4.20764	NO
Gdi1	-0.368657	6.20202	-2.53446	0.0207947	0.476007	-4.20811	NO
Trim46	-0.481763	5.48531	-2.49301	0.0226671	0.491487	-4.20957	NO
Jph3	-1.10399	-2.81857	-1.91223	0.0719459	0.624546	-4.21028	NO
Cd200r2	0.59885	-1.53724	1.98913	0.0621519	0.608004	-4.2108	NO
Gm13272	-0.920236	-2.63229	-1.95075	0.0668801	0.616016	-4.21469	NO
Pxmp4	-0.318326	3.94826	-2.34807	0.0305376	0.529404	-4.21723	NO
Mdh1b	-1.25436	-2.99085	-1.92512	0.0702136	0.622169	-4.21751	NO
Eno4	0.630759	0.967134	2.15162	0.0452952	0.57448	-4.21778	NO
Pcdhb10	-1.29257	-2.7442	-1.94993	0.0669837	0.616016	-4.21795	NO
Lmod3	1.95295	-2.99319	1.90332	0.0731649	0.626292	-4.21881	NO
Uba7	-0.554094	-4.79839	-1.73671	0.0995717	0.675032	-4.21893	NO
Tbcel	0.79312	3.41348	2.32616	0.0319287	0.529404	-4.21969	NO
Pno1	0.29176	5.14573	2.45197	0.0246772	0.503705	-4.22258	NO
Ccdc154	-1.28328	-2.83578	-1.89984	0.0736459	0.627137	-4.22259	NO
Gnb1l	-0.55665	3.25799	-2.29265	0.0341712	0.534106	-4.22587	NO
Ascl2	0.888406	-2.27494	1.95603	0.0662106	0.616016	-4.22634	NO
Ric3	2.52665	-4.5503	1.86992	0.0778999	0.634457	-4.22711	NO
Agap1	-0.198144	6.53263	-2.46225	0.0241584	0.500188	-4.22725	NO
Atf6b	-0.214986	6.66658	-2.51624	0.0215992	0.482968	-4.22865	NO
Nxpe5	0.989841	1.54965	2.1633	0.0442606	0.57197	-4.22969	NO
Mrpl28	-0.306091	6.2215	-2.49891	0.0223913	0.490548	-4.22981	NO
Nrap	1.28011	0.403277	2.04922	0.0553504	0.599196	-4.2299	NO
Snx25	-0.346173	5.64401	-2.46548	0.0239975	0.500188	-4.23082	NO
Samd3	0.931717	-4.10798	1.87681	0.076901	0.633778	-4.23094	NO
Bcorl1	-0.182461	5.13727	-2.40367	0.0272567	0.510752	-4.23183	NO
Krt90	1.92504	-0.609398	1.97787	0.0635074	0.610154	-4.23212	NO
Cpne4	-0.419943	-5.58815	-1.79456	0.0895871	0.664885	-4.23225	NO
Phex	-0.497155	-0.0713075	-2.02827	0.0576412	0.60607	-4.23316	NO
Itpa	-0.389398	5.54822	-2.49401	0.0226204	0.491487	-4.23434	NO
Taf6l	-0.273909	4.53509	-2.36727	0.0293652	0.525492	-4.23443	NO
Phldb2	0.83932	5.54498	2.49151	0.0227381	0.491583	-4.23462	NO
Rtn4ip1	0.345992	3.28229	2.31879	0.0324098	0.530558	-4.23624	NO
Trnp1	-1.81	-2.94911	-1.91017	0.0722254	0.625165	-4.2367	NO
Fcho2	-0.427548	4.75987	-2.42962	0.0258406	0.509562	-4.23815	NO
Arhgap45	0.534807	4.14794	2.40064	0.0274266	0.51299	-4.23912	NO
Prok1	1.47961	-2.04032	1.94136	0.0680846	0.616016	-4.2398	NO
Unc13c	-0.812803	-1.9062	-1.9317	0.0693435	0.620562	-4.24063	NO
Pmaip1	1.04655	3.88252	2.35172	0.0303112	0.529404	-4.24334	NO
Taco1	0.342598	2.84629	2.21745	0.0397432	0.557518	-4.24478	NO
Olfr116	-0.975861	-4.55167	-1.84525	0.081569	0.64548	-4.24671	NO
Creb3l3	-0.877578	-1.59682	-1.954	0.0664675	0.616016	-4.2492	NO
Gprin2	0.824	0.222714	2.00989	0.0597212	0.608004	-4.24988	NO
Sh2d1b1	-0.886491	1.34306	-2.14538	0.0458563	0.57448	-4.24994	NO
Tuba3b	-1.76282	-4.04328	-1.88044	0.0763789	0.632004	-4.25009	NO
Vstm5	-1.06988	-0.517242	-2.00508	0.0602773	0.608004	-4.25114	NO
Tbl3	-0.311287	4.6949	-2.42629	0.0260189	0.509562	-4.25178	NO
Clic4	0.382138	8.592	2.50207	0.0222449	0.488945	-4.25234	NO
Clec2d	0.518391	5.69703	2.49471	0.0225875	0.491487	-4.25381	NO
Zfp770	-0.385457	3.58747	-2.32035	0.0323072	0.530558	-4.2541	NO
Mylpf	1.05224	2.96894	2.2287	0.0388589	0.555461	-4.25423	NO
Phlda2	-1.13402	0.607434	-2.09154	0.0509721	0.586636	-4.25454	NO
Olfr1389	-0.7228	-3.55925	-1.84405	0.0817507	0.645524	-4.25531	NO
Pkhd1	1.35072	-4.46689	1.83516	0.0831128	0.649968	-4.25537	NO
Clip4	0.56938	7.15574	2.51576	0.0216204	0.482968	-4.25686	NO
Fntb	-0.416665	5.78908	-2.49316	0.0226602	0.491487	-4.25696	NO
Igf1	0.710814	2.82784	2.20565	0.0406897	0.561345	-4.25806	NO
Shank2	0.613995	3.5808	2.34527	0.0307121	0.529404	-4.25811	NO
Mecp2	-0.218418	6.44278	-2.51504	0.0216528	0.482968	-4.25821	NO
Sgcg	0.787932	-0.283145	1.99316	0.061673	0.608004	-4.25887	NO
Upk1b	1.85998	-1.7847	1.96165	0.0655048	0.613989	-4.25987	NO
Large2	-0.418749	5.14763	-2.46812	0.0238671	0.499024	-4.26049	NO
Ctxn3	1.28657	-4.13784	1.81945	0.0855674	0.657515	-4.26132	NO
Cfap44	2.06031	-3.57894	1.87213	0.0775778	0.633778	-4.26185	NO
Tbxa2r	-0.686379	0.446969	-2.08069	0.0520633	0.590166	-4.26214	NO
Ppfia2	-1.03656	-4.92886	-1.80033	0.0886413	0.664405	-4.26344	NO
Camkv	-0.864158	2.22601	-2.20131	0.0410427	0.561485	-4.26358	NO
Tigd4	0.665658	-1.8557	1.93917	0.0683683	0.617349	-4.26817	NO
Lrrc66	0.781704	-0.657788	1.91733	0.0712562	0.622874	-4.2684	NO
Mkln1	0.288463	6.45818	2.48123	0.0232278	0.495638	-4.26881	NO
Ccdc184	-0.867731	-1.04995	-1.96934	0.0645505	0.611923	-4.26966	NO
Wtip	0.264274	5.75058	2.39312	0.0278526	0.513925	-4.27105	NO
Slc23a4	0.819318	0.613314	2.06339	0.0538477	0.595965	-4.27136	NO
Cdc123	-0.253076	5.62995	-2.42021	0.026346	0.509746	-4.27153	NO
Mybpc2	2.63469	4.00164	2.34004	0.031041	0.529404	-4.27287	NO
Msi1	-1.67486	2.53058	-2.23731	0.0381949	0.552386	-4.27368	NO
Actr2	0.276617	8.12183	2.49743	0.0224601	0.490814	-4.27369	NO
Pthlh	-0.933231	4.06137	-2.33703	0.0312314	0.529404	-4.27769	NO
Spdya	-0.408284	3.25039	-2.28903	0.0344214	0.535581	-4.27902	NO
Cpm	1.04598	2.62252	2.24837	0.0373575	0.545383	-4.27903	NO
Zic1	-0.748866	-1.64844	-1.94593	0.0674961	0.616016	-4.28101	NO
Bcdin3d	-0.37344	2.8808	-2.24197	0.0378403	0.549951	-4.28203	NO
Olfr748	0.674358	-1.17714	1.94333	0.0678297	0.616016	-4.28304	NO
Arfgap2	-0.281475	6.68929	-2.49722	0.0224699	0.490814	-4.28331	NO
Apol7a	0.922177	3.80703	2.31648	0.0325621	0.532447	-4.28797	NO
Izumo1r	-0.929125	-2.9876	-1.88313	0.0759954	0.632004	-4.28846	NO
Gm13090	-0.831144	-5.09932	-1.79347	0.0897678	0.664885	-4.29138	NO
Olfr847	-1.00594	-3.52711	-1.84248	0.0819903	0.646724	-4.29229	NO
Lrrc9	-0.420035	-5.5626	-1.73758	0.0994162	0.675032	-4.29356	NO
Cyp17a1	1.17844	-2.04068	1.85502	0.0800974	0.641528	-4.29508	NO
Dazl	0.828901	-5.25447	1.79177	0.0900485	0.664885	-4.29576	NO
Rtn4rl2	-0.974536	-2.2651	-1.9008	0.0735125	0.627137	-4.29663	NO
Klhl31	0.864667	0.0704768	2.00028	0.060836	0.608004	-4.29687	NO
Tcf21	0.709888	-3.38434	1.82769	0.0842721	0.653894	-4.3021	NO
Riok1	-0.449147	4.74133	-2.40848	0.0269888	0.51018	-4.30215	NO
Ubd	-1.31132	-0.813736	-1.9498	0.0670007	0.616016	-4.30237	NO
Uevld	0.286716	4.98364	2.42326	0.0261814	0.509746	-4.30374	NO
B3galt1	1.18278	-1.01622	1.9469	0.0673718	0.616016	-4.30711	NO
Frat1	0.572513	0.669971	2.04125	0.0562116	0.601758	-4.30711	NO
Klk1b4	0.824677	-5.45439	1.77202	0.0933691	0.671265	-4.30726	NO
Ryr1	1.00611	2.74136	2.19038	0.0419455	0.565218	-4.30737	NO
Kpna3	0.334843	6.70611	2.48176	0.0232021	0.495638	-4.30815	NO
Adam8	0.649289	4.5661	2.39086	0.0279818	0.514656	-4.30846	NO
Phactr1	1.24939	4.11901	2.3488	0.030492	0.529404	-4.3094	NO
Gm47959	-0.551399	-5.22708	-1.74536	0.0980214	0.674883	-4.31075	NO
Ccdc43	0.259915	5.45795	2.42063	0.0263231	0.509746	-4.3115	NO
Dnaaf2	-0.374225	4.90426	-2.40794	0.0270189	0.51018	-4.31245	NO
Olfr1394	-0.972863	-3.77428	-1.82277	0.0850432	0.655615	-4.31395	NO
Cd163	0.513625	2.97736	2.23601	0.0382948	0.552534	-4.31492	NO
Tlr8	0.684906	0.370644	2.05334	0.0549097	0.598128	-4.31755	NO
Crtap	-0.326197	5.66348	-2.45278	0.0246359	0.503705	-4.32037	NO
Sim1	1.8904	-1.15287	1.93715	0.0686312	0.618686	-4.32182	NO
Whrn	-0.467597	3.38664	-2.28347	0.03481	0.537662	-4.32421	NO
Tsacc	0.437398	1.02311	2.08009	0.0521247	0.59024	-4.32525	NO
Mrgpra2b	1.53687	-3.37327	1.84571	0.0814991	0.64548	-4.32547	NO
Gm8773	1.44081	-1.59889	1.89852	0.0738291	0.627458	-4.32606	NO
Nbeal2	0.461188	5.28225	2.43752	0.0254238	0.508181	-4.32894	NO
Cyp4f14	0.882467	-5.25432	1.76117	0.0952385	0.673281	-4.33047	NO
Hbegf	-0.495333	6.69201	-2.45009	0.0247732	0.503859	-4.33239	NO
Spire1	-0.617027	5.46021	-2.45506	0.0245199	0.502863	-4.33299	NO
Ccr10	-0.745171	-2.30058	-1.89468	0.0743636	0.627458	-4.33331	NO
Mindy1	-0.265778	5.93903	-2.44094	0.0252451	0.507169	-4.33832	NO
Asah2	0.332444	3.12416	2.22342	0.0392715	0.557044	-4.34122	NO
Psma6	-0.373607	6.75163	-2.47128	0.0237116	0.499024	-4.3425	NO
Snx22	-0.476922	2.26696	-2.16365	0.0442297	0.57197	-4.34365	NO
Pth1r	-0.878086	0.965206	-2.03781	0.0565875	0.603032	-4.34388	NO
Trip6	-0.325714	6.94615	-2.44109	0.0252374	0.507169	-4.34637	NO
Gng13	-1.01155	-0.97335	-1.92397	0.0703658	0.622169	-4.34696	NO
Olfr1441	-1.02661	-1.81414	-1.88098	0.0763016	0.632004	-4.34739	NO
Tmprss2	0.570501	5.09175	2.39267	0.0278785	0.513925	-4.34824	NO
Asb16	0.621276	0.964713	2.02059	0.0585023	0.60607	-4.34832	NO
Zfp316	-0.3057	5.35136	-2.39435	0.0277825	0.513438	-4.34883	NO
Mup16	1.08478	-5.13046	1.75504	0.0963098	0.673281	-4.35129	NO
Snta1	0.304893	5.38112	2.41091	0.0268543	0.51018	-4.3517	NO
Tgm3	-0.750498	-0.719065	-1.91587	0.0714529	0.622874	-4.35364	NO
Ass1	-0.381439	5.42385	-2.40846	0.02699	0.51018	-4.35493	NO
Fank1	0.871633	-0.128403	1.98419	0.0627428	0.608234	-4.35594	NO
Cdh20	-1.57094	-4.42137	-1.78071	0.0918948	0.669092	-4.35611	NO
Exph5	1.4256	-1.42039	1.91358	0.0717627	0.624057	-4.35706	NO
Krt222	-0.525841	-1.48332	-1.87285	0.0774738	0.633778	-4.35724	NO
Slfn3	1.33694	-0.686111	1.94309	0.0678613	0.616016	-4.35842	NO
Dpep2	0.617169	1.48626	2.08797	0.0513285	0.587091	-4.3614	NO
P2ry10b	0.592602	-0.783902	1.9265	0.07003	0.622169	-4.36188	NO
Zfand3	-0.200703	5.84961	-2.39674	0.0276467	0.51299	-4.36241	NO
Myh15	-1.43383	-4.39689	-1.77488	0.0928824	0.6699	-4.36388	NO
Il12b	-1.03142	-2.86128	-1.79259	0.0899122	0.664885	-4.36461	NO
Defb1	1.46096	-4.78895	1.75499	0.0963182	0.673281	-4.36461	NO
Lct	-0.818787	-2.9649	-1.80735	0.087501	0.661775	-4.36542	NO
Ascl3	0.957904	-3.56428	1.78972	0.0903872	0.664885	-4.36571	NO
Mal2	0.505246	6.85417	2.4592	0.0243114	0.501373	-4.36632	NO
Nbdy	-0.305279	4.35398	-2.35276	0.0302471	0.529404	-4.36713	NO
Acot2	-0.352838	2.15077	-2.08059	0.0520735	0.590166	-4.36746	NO
Srarp	1.30667	-4.73059	1.76202	0.095091	0.673281	-4.36769	NO
Sgtb	-0.46922	2.4654	-2.16215	0.0443613	0.572587	-4.36822	NO
Agk	0.25086	4.48515	2.33016	0.0316705	0.529404	-4.36896	NO
Cd300ld	0.42143	1.48229	2.06332	0.0538554	0.595965	-4.36919	NO
Gm3194	1.44095	-4.07969	1.78976	0.0903808	0.664885	-4.36963	NO
Gm3383	1.44095	-4.07969	1.78976	0.0903808	0.664885	-4.36963	NO
Pex5l	-1.03574	-5.10672	-1.746	0.0979066	0.674883	-4.36971	NO
Cenps	-0.354009	5.51768	-2.41774	0.0264802	0.509746	-4.37108	NO
Uty	-0.416425	-5.553	-1.66266	0.113747	0.697193	-4.37298	NO
Kbtbd12	1.23397	-1.55144	1.85883	0.0795305	0.638606	-4.37543	NO
Gm35339	0.273259	2.87134	2.16012	0.0445402	0.57285	-4.37586	NO
Olfr1309	-0.761712	1.49938	-2.06504	0.0536753	0.595965	-4.37594	NO
Vmn1r72	0.4638	0.353695	2.00126	0.0607214	0.608004	-4.37697	NO
Trmt5	-0.388989	3.77826	-2.29354	0.0341095	0.534106	-4.37721	NO
Fndc9	-0.654819	-3.26297	-1.7861	0.0909912	0.666429	-4.37734	NO
Cebpb	-0.349306	7.50774	-2.41518	0.0266199	0.509818	-4.37889	NO
Smpd2	-0.358838	4.33305	-2.33574	0.0313136	0.529404	-4.37958	NO
Gm21293	-0.907249	-5.04937	-1.73486	0.0999077	0.675053	-4.38046	NO
Set	-0.221898	8.45742	-2.42562	0.0260544	0.509562	-4.38142	NO
Reep6	-0.713271	3.43602	-2.25159	0.0371171	0.544363	-4.38263	NO
Olfr1385	-0.622961	0.49742	-2.00964	0.0597507	0.608004	-4.38497	NO
Slc25a18	0.847068	-0.474642	1.91862	0.0710818	0.622874	-4.38569	NO
Gm14391	0.566096	0.129246	1.95266	0.0666372	0.616016	-4.38648	NO
Nptx1	-1.00327	-1.26544	-1.88801	0.0753025	0.630891	-4.38676	NO
Olfr11	1.09072	-2.92779	1.80732	0.0875069	0.661775	-4.38727	NO
Kcnk13	0.462723	0.102275	1.94342	0.0678185	0.616016	-4.38732	NO
Steap1	0.948394	-1.70485	1.85934	0.0794552	0.638606	-4.38913	NO
Ralgps2	0.418776	4.55402	2.33975	0.031059	0.529404	-4.38944	NO
Hcn4	1.51315	-0.985968	1.89681	0.0740663	0.627458	-4.38965	NO
Slc27a4	-0.393041	5.52431	-2.41296	0.0267415	0.51018	-4.39133	NO
Engase	0.518719	1.33598	2.00021	0.060844	0.608004	-4.39245	NO
Olfr832	1.20445	-4.56647	1.751	0.0970193	0.673525	-4.39268	NO
Nepn	1.40654	-4.70578	1.7469	0.0977466	0.674883	-4.39342	NO
Olfr890	0.66702	-2.62196	1.80779	0.087431	0.661775	-4.39436	NO
Olfr668	-0.821527	-3.87139	-1.77065	0.0936026	0.671592	-4.39437	NO
Stc2	-0.6645	4.59335	-2.35205	0.0302908	0.529404	-4.39442	NO
Timm8a2	0.608132	-2.85554	1.80688	0.0875769	0.661802	-4.39478	NO
Tcte1	-0.901817	-5.17022	-1.71164	0.104191	0.681951	-4.39494	NO
Krt86	0.749943	-3.15675	1.78297	0.0915148	0.667972	-4.39534	NO
Smtnl1	2.27567	-3.01814	1.77641	0.092622	0.669667	-4.3956	NO
Fgl2	0.578607	2.61949	2.18475	0.0424176	0.565218	-4.39651	NO
Stag3	2.55106	-0.175329	1.89483	0.0743433	0.627458	-4.39655	NO
Dnah6	0.913206	-1.29293	1.8746	0.0772203	0.633778	-4.39769	NO
Ramp1	-0.888561	4.68423	-2.33997	0.0310449	0.529404	-4.39772	NO
Tceal7	1.61857	-3.59115	1.76538	0.09451	0.673281	-4.39932	NO
Ddx3y	-0.422777	-5.44872	-1.65632	0.115038	0.698239	-4.39984	NO
Slc12a2	0.270397	7.44475	2.4219	0.0262548	0.509746	-4.40173	NO
Ppp1r3f	-0.567916	3.08266	-2.1895	0.042019	0.565218	-4.40247	NO
Hif3a	-0.521595	-1.52135	-1.85882	0.0795313	0.638606	-4.40455	NO
Pdcd2	-0.369518	4.36104	-2.32492	0.0320091	0.529404	-4.4049	NO
Atp10b	0.408567	6.04626	2.41536	0.0266099	0.509818	-4.40499	NO
Gdap1	1.00348	-4.10967	1.75774	0.0958368	0.673281	-4.40736	NO
Anxa5	-0.259894	8.45832	-2.44644	0.0249602	0.505415	-4.4075	NO
Rgs3	-0.361677	5.55065	-2.41651	0.0265471	0.509746	-4.4089	NO
Tsr2	-0.278631	4.34236	-2.33771	0.0311883	0.529404	-4.40917	NO
Slmap	0.376305	7.33152	2.43603	0.025502	0.508181	-4.4095	NO
Pdlim3	1.15361	1.16165	1.99919	0.0609631	0.608004	-4.41031	NO
Ptger4	0.401488	5.59364	2.37889	0.0286761	0.519548	-4.41531	NO
Pmf1	-0.397048	6.63185	-2.43622	0.0254921	0.508181	-4.41548	NO
Spc25	-0.293672	5.23023	-2.35727	0.0299707	0.529404	-4.41731	NO
Spink5	2.07692	3.21329	2.14182	0.0461795	0.57448	-4.41789	NO
Creb3l4	0.40841	2.99015	2.17694	0.0430801	0.565894	-4.41816	NO
Hapln4	0.620166	-1.26926	1.86459	0.0786798	0.636322	-4.4187	NO
BC049762	0.833552	-2.67525	1.80134	0.088476	0.664177	-4.42025	NO
Tac1	1.12151	-1.03048	1.87342	0.0773913	0.633778	-4.42223	NO
Npw	-1.21497	0.755026	-1.98948	0.0621106	0.608004	-4.42354	NO
Traf5	-0.502181	-2.65974	-1.76289	0.09494	0.673281	-4.42449	NO
Flvcr1	-0.365433	3.22521	-2.20066	0.0410962	0.561485	-4.42454	NO
Vmn2r55	-1.06771	-3.75155	-1.75002	0.0971936	0.674101	-4.42632	NO
Avpr2	0.963115	0.636766	2.00064	0.060794	0.608004	-4.42669	NO
Glis2	-0.345019	6.29734	-2.41744	0.0264966	0.509746	-4.42686	NO
Slc4a5	0.824296	-2.87816	1.76985	0.0937406	0.672255	-4.42703	NO
Sele	1.61407	-3.7824	1.74329	0.0983899	0.674883	-4.42918	NO
Cyp2b19	1.7764	0.525428	1.95495	0.0663473	0.616016	-4.4293	NO
Atp6v1fnb	0.912654	-5.12919	1.69951	0.10649	0.686846	-4.43009	NO
Ppil1	-0.304056	5.62626	-2.38787	0.028154	0.514656	-4.43059	NO
Cnga2	-1.27732	-4.24814	-1.73996	0.098986	0.675032	-4.43222	NO
Kdm8	-0.38775	2.61624	-2.14095	0.0462587	0.57448	-4.4324	NO
Slc2a12	0.832998	-2.0735	1.8056	0.0877852	0.66186	-4.43454	NO
Ripply1	-0.673997	-2.72461	-1.74515	0.0980588	0.674883	-4.43454	NO
Gm49383	-0.502441	2.83661	-2.14703	0.0457076	0.57448	-4.43717	NO
Flg2	-0.434358	-5.4248	-1.62352	0.121914	0.702644	-4.43891	NO
Cfap97d2	0.627498	-2.03151	1.78233	0.0916228	0.66843	-4.43902	NO
Oat	0.428662	6.0231	2.39669	0.0276498	0.51299	-4.43937	NO
Etnppl	0.684712	-2.3551	1.7946	0.0895805	0.664885	-4.44069	NO
Rassf8	-0.837944	5.4474	-2.33988	0.0310512	0.529404	-4.4412	NO
Fam53c	-0.21933	6.40444	-2.36509	0.0294962	0.526015	-4.44283	NO
Rnf24	-0.41562	4.01272	-2.26839	0.0358841	0.538985	-4.44409	NO
Ndufs6	-0.268012	5.69824	-2.38319	0.028425	0.516901	-4.44755	NO
Tacr3	1.16733	-3.00625	1.7561	0.0961224	0.673281	-4.44913	NO
Mxd4	-0.391211	6.63596	-2.40651	0.027098	0.510368	-4.45025	NO
Mfsd8	-0.323188	1.92849	-2.05424	0.0548134	0.598128	-4.45247	NO
Zfp870	0.498003	2.45748	2.10153	0.0499852	0.581273	-4.45346	NO
H2-M2	-0.889698	-2.96448	-1.7531	0.0966495	0.673281	-4.45489	NO
Ppm1l	0.355496	4.1175	2.22366	0.0392528	0.557044	-4.45715	NO
Obscn	1.57182	-0.533736	1.84504	0.0815999	0.64548	-4.45846	NO
Sim2	-0.461527	-5.14563	-1.62518	0.121557	0.702343	-4.46024	NO
Ube2j1	-0.209896	6.47599	-2.38853	0.0281156	0.514656	-4.46024	NO
Gm13276	-0.908248	-5.02542	-1.64845	0.116656	0.699435	-4.4603	NO
Ccdc27	-0.900189	-3.20334	-1.74308	0.098428	0.674883	-4.46166	NO
Ino80c	-0.292066	5.48765	-2.3496	0.0304423	0.529404	-4.46177	NO
Trpm5	0.526816	-0.627426	1.8918	0.0747683	0.62836	-4.46227	NO
Lrrc46	-0.556771	0.613951	-1.93517	0.0688885	0.619686	-4.46536	NO
Olfr1020	-0.854686	-3.76547	-1.72365	0.101956	0.677602	-4.46603	NO
Rrad	0.359835	1.88217	2.02166	0.0583822	0.60607	-4.46812	NO
Errfi1	-0.471193	6.93599	-2.40723	0.0270581	0.510269	-4.46816	NO
Trpc4	-0.779435	-4.92306	-1.64068	0.118273	0.699435	-4.46834	NO
Serpinb9c	0.841179	-3.22697	1.7331	0.100226	0.675318	-4.46851	NO
H2-Oa	-0.71008	-0.787814	-1.8716	0.0776552	0.633778	-4.46907	NO
Ankle2	-0.184818	6.7056	-2.36608	0.0294366	0.525588	-4.46916	NO
Ube2b	0.20981	7.42172	2.39532	0.0277271	0.513056	-4.46936	NO
Pdlim5	0.44454	7.71332	2.42282	0.0262051	0.509746	-4.47016	NO
Pomgnt1	-0.205247	6.66451	-2.396	0.0276888	0.51299	-4.47391	NO
Wars	-0.345074	6.26598	-2.39884	0.0275282	0.51299	-4.47406	NO
Utp15	-0.216361	5.72216	-2.33867	0.0311276	0.529404	-4.47448	NO
Cd3eap	-0.226125	5.14625	-2.32466	0.0320262	0.529404	-4.47606	NO
Mt3	-1.53341	-2.92611	-1.72565	0.101588	0.677602	-4.47793	NO
Rab3ip	-0.285304	5.39883	-2.33284	0.0314982	0.529404	-4.47821	NO
Pde8b	0.4357	1.06806	1.99938	0.0609415	0.608004	-4.47854	NO
Ms4a4b	0.492472	-0.572076	1.87137	0.0776878	0.633778	-4.47983	NO
Gata3	-0.314902	6.18386	-2.37348	0.0289949	0.52212	-4.48047	NO
Ces2e	-1.17909	-2.29508	-1.77986	0.0920389	0.669221	-4.48086	NO
Tmem191c	0.384153	1.72382	1.9845	0.0627062	0.608234	-4.48106	NO
Cpb1	-0.826881	-5.19644	-1.65196	0.115931	0.699435	-4.4822	NO
Scn4b	2.49683	-0.687285	1.84481	0.0816352	0.64548	-4.48444	NO
Olfr776	-0.918178	-5.36729	-1.64312	0.117764	0.699435	-4.48447	NO
BC016579	0.939542	2.28743	2.0195	0.0586253	0.60607	-4.48504	NO
Pdxp	-0.41287	4.58243	-2.29788	0.0338117	0.534106	-4.48538	NO
Atf1	0.219393	6.31351	2.35968	0.0298233	0.528657	-4.48667	NO
Osbpl1a	-0.384524	4.95868	-2.33639	0.0312718	0.529404	-4.48796	NO
Cbfa2t2	-0.327023	5.61208	-2.3553	0.0300909	0.529404	-4.48804	NO
Cdiptos	1.44215	-2.98894	1.73554	0.0997838	0.675032	-4.48821	NO
Hamp	-1.18976	-4.33981	-1.66653	0.112965	0.695041	-4.48856	NO
Lhfpl1	1.34491	-4.15667	1.69899	0.10659	0.686846	-4.48876	NO
Zfp69	-0.3466	3.48531	-2.18884	0.0420739	0.565218	-4.48893	NO
Clip2	-0.358935	5.62122	-2.35659	0.030012	0.529404	-4.48895	NO
Ccdc121	1.96245	-2.38384	1.75301	0.096665	0.673281	-4.48995	NO
Gdap1l1	-0.635365	-2.55966	-1.69131	0.108069	0.686846	-4.49001	NO
Xirp1	1.6689	-0.341015	1.86818	0.0781531	0.634683	-4.49079	NO
Gm13290	-1.44388	-3.26618	-1.71019	0.104463	0.682223	-4.49086	NO
Sntb1	0.5114	5.09596	2.26316	0.0362635	0.54033	-4.49364	NO
Nipa1	0.329527	2.00671	2.01524	0.0591091	0.60607	-4.49418	NO
Gm10340	-2.38238	-3.74832	-1.69745	0.106886	0.686846	-4.49535	NO
Rara	-0.291166	6.24968	-2.36316	0.0296127	0.526821	-4.49803	NO
Susd4	-0.377864	3.93867	-2.23427	0.0384287	0.552965	-4.49839	NO
Elobl	0.798197	-0.235481	1.86648	0.0784019	0.635043	-4.49886	NO
Kiss1r	-0.480945	0.0447632	-1.89545	0.0742564	0.627458	-4.50049	NO
Caskin2	-0.284735	5.68411	-2.34423	0.0307775	0.529404	-4.50093	NO
Eif3b	-0.232397	8.83433	-2.38357	0.0284027	0.516901	-4.50166	NO
Mpz	0.755853	0.551154	1.91793	0.071175	0.622874	-4.50264	NO
Dnase1l1	-0.301379	5.25175	-2.30371	0.0334155	0.534106	-4.50276	NO
Sval2	1.00819	-5.1861	1.63482	0.119506	0.699435	-4.50407	NO
Grm6	-0.5518	-4.22787	-1.57209	0.133394	0.720505	-4.50655	NO
Gm9774	1.32943	-2.81999	1.72335	0.102011	0.677602	-4.50715	NO
Zfp462	-0.582421	4.76881	-2.30285	0.0334736	0.534106	-4.50757	NO
Ung	-0.443183	6.58836	-2.37731	0.0287688	0.51995	-4.50791	NO
Tiam1	0.398398	4.7508	2.30099	0.0335998	0.534106	-4.50844	NO
Golph3	0.32933	7.78589	2.36676	0.0293957	0.525492	-4.50883	NO
Ubox5	-0.264736	3.82002	-2.18499	0.0423976	0.565218	-4.50971	NO
Sh2d4b	0.72457	-0.13901	1.8805	0.0763705	0.632004	-4.50985	NO
Gje1	-1.11739	-3.63882	-1.67623	0.111027	0.69223	-4.51067	NO
Marcksl1	-0.397021	8.77047	-2.39623	0.0276757	0.51299	-4.51175	NO
Alpk3	1.13438	-0.426848	1.85178	0.0805826	0.642994	-4.51326	NO
Pip	1.71193	-2.99987	1.72916	0.100945	0.677085	-4.51327	NO
Brcc3	-0.238712	5.52808	-2.34254	0.0308836	0.529404	-4.51448	NO
Cxcr4	-0.44941	4.58585	-2.29261	0.0341739	0.534106	-4.51548	NO
Popdc2	1.17634	-0.0779039	1.87186	0.0776175	0.633778	-4.51557	NO
Fgf6	1.09971	-4.13029	1.65036	0.116262	0.699435	-4.51614	NO
Cacna1s	2.28457	-2.82314	1.68983	0.108356	0.686846	-4.51709	NO
Nol3	0.729922	1.37231	1.94141	0.0680782	0.616016	-4.5189	NO
St6galnac4	-0.55428	4.2041	-2.25726	0.0366964	0.542552	-4.51936	NO
Gbp8	0.942909	-4.74688	1.63948	0.118524	0.699435	-4.52202	NO
Il1r2	-0.582486	-1.04961	-1.8096	0.0871398	0.661205	-4.52291	NO
Vmn1r4	1.30239	-4.93964	1.64904	0.116534	0.699435	-4.52479	NO
Taf9	-0.384862	3.29702	-2.14165	0.0461951	0.57448	-4.52564	NO
Capn8	1.00155	-4.04778	1.63153	0.120203	0.700272	-4.52771	NO
Aff2	-0.650343	-0.36038	-1.85018	0.0808239	0.642994	-4.52803	NO
Klf15	1.10821	1.27121	1.9871	0.0623942	0.608004	-4.52908	NO
Tax1bp1	0.247223	8.16881	2.37574	0.0288611	0.520346	-4.53111	NO
C2	1.07445	1.67499	1.99731	0.0611842	0.608004	-4.5312	NO
Klri2	-1.00489	-3.07279	-1.69597	0.107169	0.686846	-4.53198	NO
Snrpb	-0.307454	7.72791	-2.35545	0.030082	0.529404	-4.53275	NO
Fer1l6	-0.807977	-4.77225	-1.63739	0.118964	0.699435	-4.53288	NO
Ifitm6	0.896161	-2.79722	1.66185	0.113911	0.697193	-4.53373	NO
Pdzk1ip1	1.43481	1.79248	1.97999	0.06325	0.609628	-4.53408	NO
Cep295nl	0.678959	-0.00744119	1.88431	0.0758264	0.632004	-4.5341	NO
Sgta	-0.194197	7.13569	-2.34992	0.0304227	0.529404	-4.53468	NO
Gm28053	-0.962177	-4.70019	-1.63862	0.118704	0.699435	-4.53494	NO
Ppef1	0.444438	0.7883	1.91141	0.0720563	0.62477	-4.53504	NO
Brip1	0.277176	5.40314	2.31062	0.0329512	0.532921	-4.53569	NO
Dph2	-0.504832	2.22327	-2.04526	0.0557771	0.600503	-4.536	NO
Peg10	1.40707	0.353063	1.89884	0.0737848	0.627458	-4.53658	NO
Tbc1d7	-0.263521	3.42139	-2.13076	0.0471967	0.575981	-4.53687	NO
Camkmt	-0.428866	2.79337	-2.1108	0.0490845	0.581033	-4.53904	NO
Exoc3	-0.238665	5.76131	-2.33033	0.0316596	0.529404	-4.53973	NO
Astn1	-0.645573	-3.81428	-1.64547	0.117274	0.699435	-4.54278	NO
Hspb7	0.802762	0.203747	1.80066	0.0885865	0.664405	-4.54396	NO
Tagln3	1.13741	-0.501918	1.8382	0.0826443	0.648764	-4.5447	NO
Nlrc5	0.677385	4.52728	2.25453	0.0368983	0.543992	-4.54516	NO
Sema5b	-0.683356	-0.605589	-1.83708	0.0828164	0.649271	-4.54549	NO
Gm49380	1.18495	-2.71323	1.67131	0.112007	0.69375	-4.546	NO
Gm10271	0.750994	-2.96643	1.69203	0.107931	0.686846	-4.54612	NO
Cul9	1.0142	1.84376	2.00331	0.0604825	0.608004	-4.54703	NO
Klk14	1.58269	2.14701	2.00527	0.0602543	0.608004	-4.54745	NO
Pcbd2	-0.306028	3.20198	-2.13014	0.0472543	0.575981	-4.54816	NO
Ankrd63	-0.786666	-0.352722	-1.82412	0.0848311	0.654919	-4.54861	NO
Eif4h	-0.242514	9.37701	-2.35601	0.0300478	0.529404	-4.54888	NO
Rtn1	-0.951756	0.49598	-1.90603	0.0727914	0.625692	-4.54888	NO
Scgb1c1	0.87091	-4.88723	1.61804	0.123095	0.703935	-4.54898	NO
Osbpl2	-0.225937	5.46359	-2.32948	0.0317144	0.529404	-4.55041	NO
Ccdc54	-0.730887	-5.1946	-1.58262	0.130972	0.718155	-4.55212	NO
Hoxb2	-1.33214	4.01225	-2.18254	0.0426038	0.565218	-4.55251	NO
Dcpp3	1.24168	-4.42938	1.62887	0.120768	0.700691	-4.55261	NO
Ntn5	-0.98713	-2.57585	-1.71101	0.104309	0.682121	-4.55319	NO
Jhy	-0.421785	-5.44039	-1.54731	0.139243	0.729589	-4.55334	NO
Olfr1356	-0.466487	-1.8662	-1.69143	0.108047	0.686846	-4.55485	NO
Nudcd1	0.252628	5.14815	2.28812	0.0344847	0.536	-4.5556	NO
Pax7	0.591727	-5.03288	1.53636	0.141895	0.734648	-4.5559	NO
Il6	0.480045	-0.856599	1.78963	0.0904025	0.664885	-4.56051	NO
Tmem88	-0.504501	1.17091	-1.95786	0.0659799	0.615682	-4.56117	NO
Bcor	-0.245828	5.92841	-2.2978	0.0338173	0.534106	-4.56228	NO
Crebzf	-0.378311	6.27365	-2.31306	0.0327882	0.532921	-4.56288	NO
Vmn1r89	-0.451081	-1.89424	-1.70433	0.105571	0.68582	-4.56644	NO
Vmn2r83	-0.407013	-4.91034	-1.47324	0.158009	0.744469	-4.5692	NO
Zfp1	-0.208493	4.33576	-2.17941	0.04287	0.565894	-4.56983	NO
B4galt4	-0.431251	4.34985	-2.23619	0.0382811	0.552534	-4.57053	NO
Prop1	0.7575	-4.41184	1.6022	0.126567	0.710277	-4.57113	NO
Met	0.66811	6.96592	2.34938	0.0304563	0.529404	-4.57137	NO
Rps6ka5	-0.380147	3.84258	-2.17245	0.0434656	0.567474	-4.57365	NO
AU018091	0.492883	3.49098	2.08107	0.0520249	0.590166	-4.57376	NO
Adh6b	-0.789317	-3.48608	-1.66566	0.11314	0.695363	-4.57427	NO
Fbxo39	0.997805	-1.57129	1.75779	0.0958275	0.673281	-4.57531	NO
Gm12888	1.54718	-0.499198	1.83492	0.0831488	0.649968	-4.5771	NO
Riox2	0.478218	4.38673	2.21784	0.0397121	0.557518	-4.5772	NO
Scube3	0.975881	3.61477	2.1349	0.0468135	0.575981	-4.5774	NO
Rps27rt	-1.38548	-1.52085	-1.7235	0.101983	0.677602	-4.57743	NO
Krt16	1.45587	3.62905	2.10811	0.0493442	0.581033	-4.57899	NO
Slc20a1	-0.429552	7.45515	-2.349	0.0304801	0.529404	-4.57918	NO
Kcnj3	0.824581	-4.50773	1.62407	0.121795	0.702343	-4.57928	NO
Ugt8a	2.05295	-0.393572	1.83437	0.0832347	0.649968	-4.58112	NO
Zfp319	-0.250845	6.04552	-2.3109	0.0329322	0.532921	-4.58206	NO
Vmn1r228	0.979178	-3.94729	1.60128	0.12677	0.710277	-4.58211	NO
Csf1	0.244722	6.25145	2.30875	0.0330763	0.532962	-4.58216	NO
Hagh	-0.198981	5.28828	-2.24908	0.0373045	0.545383	-4.58353	NO
Atp6v1g3	-0.840845	-4.02037	-1.62515	0.121562	0.702343	-4.58361	NO
Galt	-0.33094	3.45082	-2.13604	0.0467084	0.575981	-4.5856	NO
Tyw1	-0.186681	5.25087	-2.21867	0.0396459	0.557518	-4.58631	NO
Svip	0.847133	1.14862	1.92655	0.0700234	0.622169	-4.58633	NO
Rpl39l	0.479342	-1.77323	1.62661	0.121251	0.701838	-4.58704	NO
Trpc4ap	-0.220203	6.86145	-2.32552	0.0319701	0.529404	-4.58751	NO
Ak6	-0.261869	6.70908	-2.31334	0.0327697	0.532921	-4.58779	NO
Actn2	2.81337	-1.20589	1.74298	0.0984456	0.674883	-4.58789	NO
Nxpe4	0.593011	-0.698935	1.75505	0.0963074	0.673281	-4.58859	NO
Slc24a1	-0.886295	-4.19387	-1.60557	0.125822	0.70992	-4.5888	NO
Rab27b	0.49684	5.61608	2.32042	0.0323025	0.530558	-4.5895	NO
Mip	-0.502031	-0.588774	-1.78728	0.0907941	0.665673	-4.58962	NO
Fam151b	-0.491635	0.769939	-1.90419	0.0730441	0.626292	-4.59138	NO
Trmu	-0.452865	2.2792	-1.99566	0.0613782	0.608004	-4.59198	NO
Xntrpc	-0.863001	-0.887738	-1.79129	0.0901279	0.664885	-4.59271	NO
Wls	0.446629	6.57736	2.32606	0.0319352	0.529404	-4.5928	NO
Olfr1181	-0.435398	-4.30776	-1.56708	0.13456	0.722144	-4.59285	NO
Pcdha11	1.5388	-4.61234	1.60607	0.12571	0.709569	-4.59435	NO
Cyp11a1	-1.37778	-4.11861	-1.61336	0.124112	0.705944	-4.59659	NO
Fam199x	-0.178685	5.25027	-2.24609	0.0375286	0.546496	-4.59667	NO
Ctps2	-0.187364	6.21885	-2.29775	0.0338206	0.534106	-4.59687	NO
Tmprss11d	0.373922	-0.107887	1.80004	0.0886879	0.664417	-4.59687	NO
Zfyve21	-0.302652	4.47192	-2.21824	0.03968	0.557518	-4.59782	NO
Lhx4	-1.31275	-4.47208	-1.59092	0.129088	0.716045	-4.59866	NO
Mup17	1.06936	-5.20721	1.56413	0.13525	0.723772	-4.60083	NO
Kcng3	-1.30853	-3.53476	-1.62398	0.121814	0.702343	-4.60173	NO
Cnot11	-0.249604	5.57557	-2.31476	0.0326754	0.532921	-4.60179	NO
Arpp21	1.45572	-4.47508	1.58426	0.130597	0.718155	-4.60191	NO
Ttc9b	-0.657364	-2.79976	-1.61033	0.124775	0.708351	-4.60237	NO
Ubl4a	-0.247502	6.56915	-2.34616	0.0306564	0.529404	-4.6034	NO
Slf1	-0.300439	4.68788	-2.22468	0.0391725	0.557044	-4.60602	NO
Glt28d2	0.304799	3.54931	2.1491	0.0455207	0.57448	-4.60702	NO
Wfdc18	0.880391	8.12726	2.34317	0.0308439	0.529404	-4.60725	NO
Rpusd2	-0.434279	2.40702	-2.02653	0.057836	0.60607	-4.60878	NO
Sh2b2	-0.551816	4.66528	-2.23572	0.0383174	0.552534	-4.60938	NO
Ddx24	-0.22984	6.63363	-2.29209	0.0342098	0.534106	-4.60992	NO
Ppp1cc	-0.201763	8.285	-2.3242	0.0320559	0.529404	-4.61075	NO
Cdr2l	-0.455776	5.77015	-2.30252	0.0334958	0.534106	-4.61113	NO
Gja3	-1.07817	-0.839998	-1.777	0.0925224	0.669667	-4.6112	NO
Plcd4	2.57378	-1.93898	1.72421	0.101853	0.677602	-4.61204	NO
Gm10130	-0.338039	2.66164	-2.03686	0.0566919	0.603032	-4.61261	NO
Olfr447	0.51587	-4.58108	1.55132	0.138282	0.729534	-4.61363	NO
Arhgef33	-0.741904	-0.207054	-1.78394	0.0913529	0.667972	-4.6145	NO
Gpt2	-0.445566	4.9472	-2.20055	0.0411056	0.561485	-4.6149	NO
Tdrkh	-0.509334	3.6113	-2.14131	0.0462261	0.57448	-4.61502	NO
Zfp157	-0.299143	4.1505	-2.15843	0.0446895	0.573315	-4.61516	NO
Zglp1	0.729572	-0.343819	1.76113	0.0952454	0.673281	-4.61549	NO
Yars	-0.318757	6.11614	-2.30634	0.0332379	0.532962	-4.61556	NO
Fmo2	-2.34537	-2.36687	-1.65643	0.115014	0.698239	-4.6159	NO
Tmcc3	0.528665	5.57111	2.29238	0.0341897	0.534106	-4.61667	NO
Pde8a	0.842106	4.08571	2.15162	0.0452948	0.57448	-4.61721	NO
Tmem163	-0.705856	-2.24882	-1.68851	0.108613	0.686846	-4.619	NO
Ercc8	-0.297552	3.38552	-2.10918	0.0492416	0.581033	-4.61945	NO
H2-Bl	2.25908	1.2	1.89201	0.0747382	0.62836	-4.61965	NO
Pik3ap1	0.616486	4.03033	2.17844	0.0429525	0.565894	-4.61967	NO
Pou3f4	0.926994	-5.01916	1.55983	0.136261	0.726366	-4.62063	NO
Lrr1	-0.417523	3.02471	-2.07348	0.0528003	0.593868	-4.62126	NO
Tssk3	-0.472226	-3.35843	-1.57415	0.132918	0.719675	-4.62181	NO
Il1f5	1.1916	-3.98157	1.58524	0.130375	0.718059	-4.62258	NO
Olfr810	1.70268	-2.64671	1.64326	0.117735	0.699435	-4.62277	NO
Gm6133	0.721619	-3.78907	1.57974	0.13163	0.718678	-4.62671	NO
Zfand2b	-0.430267	4.9464	-2.25149	0.0371241	0.544363	-4.62678	NO
Bco2	0.491668	-1.96318	1.68671	0.108965	0.687617	-4.62684	NO
Tmprss5	0.699	-4.63787	1.54888	0.138865	0.729589	-4.62686	NO
Guca2b	-0.828702	-5.18274	-1.51722	0.14663	0.739067	-4.62689	NO
Vps13c	0.454215	3.42508	2.09506	0.0506222	0.584431	-4.6279	NO
Mettl21c	0.724653	-4.28025	1.58368	0.13073	0.718155	-4.62874	NO
Olfr5	-0.817612	-3.7801	-1.58889	0.129548	0.716344	-4.62975	NO
Arhgap6	-0.499393	3.65953	-2.11953	0.0482505	0.578157	-4.6298	NO
Gm14124	0.861449	-4.26627	1.56954	0.133985	0.721526	-4.63113	NO
Zfp334	-0.331869	4.59308	-2.218	0.0396995	0.557518	-4.63254	NO
Fcgr2b	0.50911	4.86129	2.21234	0.04015	0.558771	-4.63298	NO
Cyp2j9	1.00602	-1.76069	1.69206	0.107925	0.686846	-4.63501	NO
Ehf	0.608001	8.53655	2.32491	0.0320101	0.529404	-4.63577	NO
Sipa1l2	-0.326629	3.60678	-2.10641	0.0495093	0.581216	-4.6359	NO
Asgr2	-0.734697	-2.34044	-1.68208	0.109871	0.690443	-4.63682	NO
Fbxo43	-0.487354	-1.60637	-1.67758	0.110759	0.691529	-4.63744	NO
Klkb1	-0.474219	-1.29548	-1.72208	0.102245	0.677894	-4.63791	NO
Ddx27	-0.273281	6.62744	-2.29099	0.0342855	0.534593	-4.63799	NO
Cfap47	1.91355	-3.8308	1.61469	0.123823	0.705119	-4.63836	NO
Ccdc181	-0.352103	5.10921	-2.25712	0.0367066	0.542552	-4.63844	NO
Ndufb9	0.385043	6.30702	2.27536	0.035384	0.538985	-4.64073	NO
Tbata	-0.835319	-1.12252	-1.73183	0.100457	0.675318	-4.64231	NO
Aldh1a1	1.17241	-1.45443	1.65973	0.114342	0.697193	-4.64286	NO
Gsap	0.287771	3.9544	2.09966	0.0501687	0.581397	-4.64312	NO
Dtx3l	0.313152	6.63198	2.29562	0.0339662	0.534106	-4.64361	NO
Tmem147	0.275113	5.3215	2.24984	0.0372478	0.545095	-4.64459	NO
Fam166a	-0.847125	-3.73682	-1.55678	0.136983	0.727722	-4.64485	NO
Esp18	1.22974	-4.49647	1.56183	0.135791	0.725167	-4.64708	NO
Ppp1r3d	0.461811	0.482376	1.81228	0.0867096	0.661205	-4.64741	NO
Eps8l2	-0.329548	6.37254	-2.30422	0.0333805	0.534106	-4.64805	NO
Xrcc3	-0.442268	4.34414	-2.17475	0.0432679	0.565894	-4.64812	NO
Kcne3	-0.730424	2.56738	-2.0153	0.0591026	0.60607	-4.64955	NO
Aldh9a1	-0.18199	5.24651	-2.23048	0.0387208	0.554676	-4.64956	NO
Notch3	-0.343393	6.72668	-2.26823	0.0358955	0.538985	-4.64995	NO
Olfr97	-0.712028	-5.24801	-1.51104	0.148187	0.739067	-4.64998	NO
Zdhhc18	-0.346943	7.0905	-2.31273	0.0328107	0.532921	-4.65038	NO
Slc35b2	-0.251009	6.85679	-2.29707	0.0338667	0.534106	-4.65173	NO
Brsk2	-1.52028	-3.15574	-1.59054	0.129175	0.716079	-4.65298	NO
Odc1	-0.222674	6.24674	-2.29733	0.0338492	0.534106	-4.65476	NO
Loxhd1	1.27703	-3.77985	1.56695	0.134589	0.722144	-4.65529	NO
Rsph6a	-0.544051	-5.19905	-1.49042	0.15348	0.73988	-4.65534	NO
Olfr67	-0.814937	-4.76462	-1.54287	0.140312	0.730808	-4.65568	NO
Cetn3	-0.243399	6.11573	-2.27562	0.0353653	0.538985	-4.65645	NO
Nlrp9c	0.598942	-3.21906	1.59725	0.127667	0.711835	-4.65664	NO
Mrpl41	-0.356823	4.42039	-2.198	0.0413145	0.562258	-4.6568	NO
Ccdc188	-0.851118	-4.09926	-1.54648	0.139442	0.729589	-4.65721	NO
Vmn2r70	-0.562888	-2.71189	-1.62839	0.120871	0.700972	-4.65785	NO
Nmu	1.33274	-1.34502	1.69768	0.106842	0.686846	-4.65856	NO
Lime1	-0.243366	3.96729	-2.11288	0.0488849	0.58072	-4.65872	NO
Arsj	0.722836	-1.36341	1.70883	0.10472	0.682612	-4.65882	NO
Bmp2	0.874839	4.54865	2.15411	0.0450727	0.57448	-4.65932	NO
Erich5	0.737441	-3.92814	1.55536	0.137319	0.7278	-4.66076	NO
Fgd4	0.3591	4.21689	2.15599	0.0449051	0.57448	-4.66179	NO
Cyp11b1	-0.933842	-4.81318	-1.52848	0.143827	0.73737	-4.66209	NO
Snapc4	-0.230397	4.7617	-2.1856	0.0423464	0.565218	-4.66255	NO
Stk10	0.343461	5.76967	2.28161	0.0349408	0.538095	-4.66459	NO
Olfr954	0.502386	-2.1255	1.64368	0.117648	0.699435	-4.66464	NO
Bloc1s5	-0.352089	4.11611	-2.13074	0.0471987	0.575981	-4.66481	NO
Nol8	-0.205501	4.92473	-2.2049	0.0407505	0.561345	-4.66493	NO
Cmc4	-0.327464	3.69919	-2.12232	0.0479875	0.577493	-4.66529	NO
Cd5	0.341152	-0.479463	1.71812	0.102979	0.679405	-4.66592	NO
Foxn3	0.229234	6.09028	2.23038	0.0387289	0.554676	-4.666	NO
Gm36210	0.771947	-3.61964	1.5784	0.131939	0.719606	-4.66792	NO
Wnt5a	1.05191	3.13884	2.02416	0.0581012	0.60607	-4.66835	NO
Klhl33	0.402397	1.59511	1.84933	0.0809512	0.642994	-4.67049	NO
Eml1	-0.710201	3.23982	-2.08265	0.0518643	0.590166	-4.67085	NO
Scgb1b27	2.35858	-3.5651	1.60637	0.125644	0.709569	-4.67191	NO
Cyp2c55	0.946459	-3.87854	1.52721	0.144142	0.738003	-4.67203	NO
Pan2	-0.348315	5.19998	-2.22698	0.0389934	0.555768	-4.67268	NO
Rtf2	-0.159936	6.37821	-2.21109	0.040251	0.559412	-4.67484	NO
Olfr1	0.590944	-2.50188	1.63581	0.119297	0.699435	-4.67506	NO
Nup214	-0.200699	6.22802	-2.2595	0.036532	0.542142	-4.67668	NO
Ccl6	0.873642	3.85743	2.08796	0.0513297	0.587091	-4.67674	NO
Traf2	-0.293732	5.82275	-2.26606	0.0360529	0.539916	-4.67689	NO
Cwc22	-0.299731	4.11267	-2.13095	0.0471796	0.575981	-4.67941	NO
Sptb	-0.422722	6.34696	-2.27652	0.0353011	0.538985	-4.67962	NO
Olfr943	0.378585	-0.949941	1.63797	0.118841	0.699435	-4.67975	NO
Gm572	1.21492	-4.95205	1.51154	0.14806	0.739067	-4.67978	NO
Galnt15	0.965483	2.08067	1.93566	0.0688252	0.619679	-4.68005	NO
Cd79a	-0.670543	-1.5076	-1.68264	0.109761	0.690443	-4.68068	NO
Abcb11	0.73279	-5.26032	1.50187	0.150521	0.739219	-4.68226	NO
Tsnaxip1	0.482427	-0.462085	1.72544	0.101626	0.677602	-4.68352	NO
Atrip	-0.246876	3.60445	-2.06305	0.0538833	0.595965	-4.68669	NO
Cyb5rl	0.538559	3.32289	2.06054	0.0541467	0.59708	-4.68684	NO
Vps37d	-0.511319	2.6161	-1.98612	0.0625114	0.608065	-4.68833	NO
Ldlrap1	-0.311035	6.18626	-2.28446	0.0347405	0.53715	-4.68901	NO
Agr2	1.4178	-3.99718	1.54813	0.139046	0.729589	-4.69002	NO
Gm9	-0.35124	-5.47227	-1.42006	0.172731	0.757314	-4.69008	NO
Dpys	0.689111	-2.19268	1.6004	0.126966	0.710449	-4.69074	NO
Glt8d2	0.722815	-1.42161	1.68927	0.108465	0.686846	-4.69098	NO
Dab2	0.334307	5.89865	2.25718	0.0367022	0.542552	-4.69118	NO
Esp6	0.836944	-3.17453	1.57949	0.131687	0.718678	-4.69119	NO
S100a4	0.36933	5.41325	2.23477	0.0383898	0.552965	-4.69242	NO
Utp4	-0.20213	5.8205	-2.2044	0.0407913	0.561345	-4.69308	NO
Cir1	-0.276389	5.03663	-2.20874	0.0404394	0.560158	-4.69403	NO
Saxo2	-0.407725	1.37629	-1.8888	0.0751899	0.630468	-4.69613	NO
Ndnf	1.24523	0.0964319	1.78328	0.0914628	0.667972	-4.69657	NO
Secisbp2	-0.220137	4.5404	-2.16543	0.0440743	0.57138	-4.69665	NO
Tmem30a	0.32116	7.6175	2.26905	0.0358367	0.538985	-4.69759	NO
Hoxb4	-1.61392	2.91724	-2.00511	0.0602736	0.608004	-4.69921	NO
Gm8882	0.568948	-4.86202	1.48631	0.154555	0.742044	-4.69944	NO
Mup6	0.578728	-1.6096	1.66099	0.114086	0.697193	-4.70066	NO
Phkg1	0.895131	0.287321	1.76683	0.0942594	0.673034	-4.70143	NO
Dlgap3	0.53137	-0.128349	1.69257	0.107826	0.686846	-4.70424	NO
Pcdh9	-0.725689	-4.98201	-1.47776	0.156807	0.743719	-4.70495	NO
Rprml	-0.558899	-2.02398	-1.61503	0.123748	0.704964	-4.70509	NO
Cavin2	-0.377912	4.33218	-2.12928	0.0473342	0.575981	-4.70576	NO
Olfr165	0.378449	-1.95998	1.58835	0.129669	0.716344	-4.70693	NO
Slc5a1	-0.617093	1.3894	-1.90601	0.072795	0.625692	-4.70698	NO
Ajm1	0.507212	-0.972512	1.69853	0.106678	0.686846	-4.70767	NO
Ear2	-1.51613	-3.29538	-1.55302	0.137876	0.729534	-4.7093	NO
Cblb	0.379096	6.21061	2.27119	0.0356823	0.538985	-4.70959	NO
Rlim	-0.16121	7.83018	-2.28152	0.0349474	0.538095	-4.70981	NO
Mecr	-0.296978	3.98428	-2.08394	0.051734	0.589888	-4.7099	NO
Cacng6	1.44142	-4.05902	1.50248	0.150366	0.739219	-4.71141	NO
Rbm7	0.29345	5.2526	2.20954	0.0403751	0.559792	-4.71198	NO
Cfap126	0.566928	-0.124761	1.72027	0.10258	0.678673	-4.71347	NO
Cyp4a12b	-1.0288	-4.68885	-1.46697	0.159689	0.745921	-4.71366	NO
Poln	-0.51957	-0.368563	-1.67536	0.111199	0.692231	-4.71543	NO
Cst7	0.329614	-0.834246	1.63239	0.12002	0.700205	-4.71549	NO
Ceacam2	1.72332	-3.58967	1.57164	0.133498	0.720505	-4.71558	NO
Ubr2	-0.184603	6.73332	-2.27792	0.0352019	0.538985	-4.71595	NO
Crybb2	-0.387574	-5.45467	-1.35771	0.191384	0.772108	-4.71618	NO
Scgb2b27	1.79632	-1.81178	1.66183	0.113915	0.697193	-4.71661	NO
Mcf2	-0.357024	-5.12684	-1.40325	0.177607	0.762939	-4.71676	NO
Chst8	0.793121	-3.73299	1.51046	0.148333	0.739067	-4.71767	NO
Xlr4a	0.95714	-2.2349	1.57357	0.13305	0.719675	-4.7197	NO
Kcnk5	0.760615	3.24513	2.01474	0.0591665	0.60607	-4.72095	NO
Stmn3	-1.02933	-4.92602	-1.46188	0.161064	0.746559	-4.72118	NO
Nod1	0.547193	4.04231	2.10397	0.0497468	0.581216	-4.72244	NO
Cd24a	0.487942	8.7466	2.27158	0.0356542	0.538985	-4.72281	NO
Trpm6	0.483416	5.08364	2.2184	0.0396675	0.557518	-4.72295	NO
Gm5741	-0.674707	-0.490229	-1.69613	0.107139	0.686846	-4.72344	NO
Bach1	0.201581	6.17121	2.18744	0.0421918	0.565218	-4.72381	NO
Sdr16c5	1.30773	2.75019	1.90648	0.0727301	0.625692	-4.72386	NO
Rims1	0.833339	-4.43695	1.51627	0.146869	0.739067	-4.72388	NO
Klk13	1.47313	1.61932	1.88201	0.076155	0.632004	-4.72479	NO
Madd	-0.244357	4.95917	-2.15375	0.0451043	0.57448	-4.72538	NO
Olfr763	-0.430441	-5.32716	-1.42562	0.171141	0.756262	-4.72633	NO
Mucl1	0.516452	-5.12586	1.40138	0.178156	0.76406	-4.72701	NO
Gm10985	-0.818115	-2.18078	-1.60782	0.125326	0.709299	-4.72873	NO
Fhit	1.11769	-3.24136	1.56369	0.135353	0.723772	-4.72915	NO
Casp1	0.33659	4.52066	2.0818	0.051951	0.590166	-4.73002	NO
Tlx1	-0.962353	-5.13227	-1.4477	0.164947	0.750849	-4.73019	NO
Cpne5	-0.725754	-3.24195	-1.55887	0.136487	0.727044	-4.7303	NO
Gm7879	-0.369067	3.79428	-2.10497	0.0496494	0.581216	-4.73051	NO
Pnma5	0.631686	-1.73914	1.62118	0.122417	0.703534	-4.73078	NO
Smpd1	-0.286463	4.77738	-2.17857	0.0429417	0.565894	-4.73116	NO
Stac	0.986499	-5.09087	1.44708	0.165117	0.750849	-4.7317	NO
Fgg	-0.795121	-1.42505	-1.5772	0.132213	0.719675	-4.73189	NO
Pid1	0.523069	2.71126	1.99062	0.0619751	0.608004	-4.73262	NO
Ces2g	-1.06298	-2.2333	-1.53184	0.143	0.735473	-4.73301	NO
Olfr371	-0.811682	-5.00937	-1.44712	0.165106	0.750849	-4.73306	NO
Myh7	-1.11385	-4.35469	-1.49541	0.152185	0.739219	-4.73336	NO
Bche	1.98399	-0.657973	1.66647	0.112978	0.695041	-4.73461	NO
Fbxl18	-0.258659	5.53351	-2.21843	0.0396649	0.557518	-4.73623	NO
Lyst	-0.444236	5.19095	-2.21569	0.0398831	0.557683	-4.73835	NO
Fam155a	-1.06934	-4.44079	-1.49253	0.152932	0.739702	-4.73891	NO
Usf1	-0.169702	6.07283	-2.19509	0.0415545	0.564274	-4.73959	NO
Zfp865	-0.224097	3.90512	-2.02826	0.0576425	0.60607	-4.73967	NO
Tesmin	-0.730657	-0.719189	-1.69932	0.106528	0.686846	-4.74013	NO
Pdzd4	-0.527065	5.14587	-2.17692	0.0430822	0.565894	-4.74021	NO
Mttp	-0.387537	3.05233	-1.98818	0.0622656	0.608004	-4.74096	NO
Wdfy2	0.321997	5.82774	2.23744	0.0381852	0.552386	-4.74099	NO
Elovl4	0.732726	3.64719	2.03503	0.0568927	0.603504	-4.74196	NO
Cyp19a1	-0.694088	-3.50268	-1.49145	0.153214	0.73988	-4.7449	NO
Vmn1r49	0.341211	-0.246893	1.70565	0.105321	0.685097	-4.74592	NO
Insl6	0.807547	0.978906	1.79913	0.0888377	0.664714	-4.74596	NO
Cib3	-0.380279	-5.21974	-1.36556	0.188949	0.771466	-4.74612	NO
Pdgfa	-0.325868	6.5812	-2.1991	0.0412241	0.562258	-4.74629	NO
Rxylt1	-0.354056	2.10322	-1.91003	0.0722444	0.625165	-4.74644	NO
Hdac8	-0.215889	3.95162	-2.07276	0.0528746	0.593868	-4.74699	NO
C9	0.56655	-0.890671	1.65982	0.114324	0.697193	-4.74779	NO
Dhrs7c	1.63305	-3.72608	1.48144	0.155836	0.742521	-4.74799	NO
Stac2	-0.710147	5.62638	-2.20295	0.0409093	0.561485	-4.74821	NO
Mageb3	-0.845975	-3.5497	-1.51286	0.147727	0.739067	-4.74822	NO
Topaz1	-0.479174	-5.02463	-1.38258	0.183758	0.766489	-4.74857	NO
Spink6	-0.367456	-5.36552	-1.38577	0.182798	0.765722	-4.7502	NO
Olfr824	-0.605344	-3.17408	-1.55616	0.13713	0.727722	-4.75067	NO
Ddx59	-0.23112	4.35572	-2.12505	0.0477305	0.575981	-4.75208	NO
Rspo2	-0.478307	-5.08556	-1.3804	0.184418	0.767726	-4.75284	NO
Emilin3	-0.877827	-1.70411	-1.60829	0.125222	0.709192	-4.75468	NO
Aipl1	0.614117	0.0426356	1.73685	0.0995465	0.675032	-4.75492	NO
Raver2	-0.406271	3.4145	-2.01074	0.0596239	0.608004	-4.75537	NO
Bricd5	-0.670463	0.514327	-1.75346	0.0965866	0.673281	-4.75632	NO
Zc2hc1a	0.268396	5.80138	2.22725	0.0389719	0.555768	-4.75655	NO
Olfr517	-0.804817	-4.21141	-1.47514	0.157503	0.743719	-4.75708	NO
Slamf7	-0.679239	-1.00179	-1.65152	0.116022	0.699435	-4.75743	NO
Ube2a	-0.216683	6.01723	-2.22164	0.0394114	0.557518	-4.75817	NO
Degs2	-0.865538	-1.88414	-1.61827	0.123044	0.703935	-4.75838	NO
Noa1	-0.25654	4.90307	-2.18488	0.0424063	0.565218	-4.75841	NO
Acss1	0.645481	4.12054	2.12006	0.0482008	0.578157	-4.75848	NO
Arid3a	-0.337178	3.12314	-1.98383	0.0627868	0.608234	-4.7585	NO
Nodal	-0.360483	-5.18745	-1.32315	0.202398	0.781948	-4.7593	NO
Romo1	-0.280694	4.57614	-2.1192	0.0482824	0.578157	-4.75968	NO
Bag6	-0.275327	8.59753	-2.26442	0.0361723	0.54033	-4.75985	NO
Arhgap4	0.888933	3.29496	2.04506	0.0557985	0.600503	-4.76106	NO
T	0.836552	-4.60967	1.44686	0.165177	0.750849	-4.76123	NO
Ttc6	-1.75758	-1.42865	-1.6124	0.124322	0.706322	-4.76139	NO
Olfr846	-0.463112	-0.260359	-1.71343	0.103855	0.681223	-4.76159	NO
Plxdc1	0.564799	2.77104	1.92449	0.0702975	0.622169	-4.76211	NO
Klhl36	-0.276474	3.1833	-1.98338	0.0628409	0.608234	-4.76339	NO
Dscaml1	-0.571933	-5.16709	-1.41209	0.17503	0.758805	-4.76389	NO
Tax1bp3	0.149204	7.55907	2.21408	0.040011	0.558415	-4.76405	NO
Ube2f	-0.418	6.08584	-2.23927	0.0380455	0.551847	-4.76417	NO
Acss2	-0.459	2.26875	-1.90779	0.0725508	0.625386	-4.76468	NO
Gstz1	-0.231357	5.20496	-2.13218	0.0470652	0.575981	-4.76492	NO
Wnt6	0.618002	0.305618	1.71123	0.104268	0.682121	-4.76501	NO
Musk	-0.866999	-3.76162	-1.46477	0.160283	0.745921	-4.76645	NO
Utp3	-0.19716	6.5427	-2.21241	0.0401449	0.558771	-4.76732	NO
Hsf2bp	0.874165	-2.10806	1.57168	0.133488	0.720505	-4.76748	NO
Fgf18	-0.969215	-1.54492	-1.58564	0.130284	0.71803	-4.76771	NO
Cask	0.213492	6.79203	2.2007	0.0410932	0.561485	-4.76776	NO
Dqx1	0.480051	3.88604	2.04716	0.0555718	0.600273	-4.76813	NO
Gm7324	0.28692	2.8509	1.94056	0.0681875	0.616191	-4.76947	NO
Tmc5	0.433759	-1.56509	1.61907	0.122873	0.703739	-4.76948	NO
Rasal1	0.591854	4.61915	2.15796	0.0447305	0.573342	-4.76965	NO
Stfa2	0.737859	-4.90627	1.42752	0.1706	0.755571	-4.77005	NO
Uts2	-1.16698	-4.61902	-1.46884	0.159188	0.745921	-4.7704	NO
P2rx1	1.33245	-4.28166	1.46705	0.159668	0.745921	-4.77111	NO
Stard6	-0.579886	0.469251	-1.77126	0.0934985	0.671265	-4.77119	NO
Olfr194	0.915029	-4.53794	1.45508	0.162916	0.748246	-4.77136	NO
Rnf212	0.654015	-3.97133	1.47758	0.156855	0.743719	-4.77167	NO
Ell3	-0.362771	4.3724	-2.10838	0.0493181	0.581033	-4.77186	NO
Hcrtr1	0.957601	-4.54884	1.43479	0.168546	0.753798	-4.77276	NO
Vti1b	-0.194123	5.51522	-2.18524	0.0423764	0.565218	-4.77493	NO
Psmc3	-0.216958	7.75434	-2.19096	0.0418972	0.565218	-4.77554	NO
Tmem130	0.544151	-1.24684	1.60518	0.125907	0.70992	-4.77708	NO
Tubal3	0.774743	-3.17692	1.50361	0.150076	0.739219	-4.77742	NO
Krt36	0.980565	-5.18776	1.42503	0.171309	0.756453	-4.77785	NO
Ppp3r2	-0.330118	-5.5169	-1.34744	0.194606	0.774928	-4.77793	NO
Nkx1-1	-1.14255	-4.67752	-1.4352	0.168431	0.753798	-4.77842	NO
Nek11	-0.407147	-0.631007	-1.66307	0.113664	0.696996	-4.77907	NO
Arhgef10	0.519859	5.16305	2.17995	0.0428238	0.565894	-4.78082	NO
Cpa2	1.48132	-2.13331	1.56957	0.133979	0.721526	-4.78086	NO
Synj2	-0.404261	4.71137	-2.14397	0.0459844	0.57448	-4.78181	NO
Akain1	-0.621984	-5.24508	-1.3924	0.180815	0.765446	-4.78215	NO
Capsl	0.596274	2.10161	1.87824	0.0766958	0.632676	-4.78237	NO
Chrnb3	-0.772816	-3.17075	-1.48344	0.155308	0.742452	-4.78272	NO
Flt4	0.384531	3.60886	2.02574	0.0579234	0.60607	-4.78337	NO
Fkbp6	2.42578	-2.46288	1.52195	0.145448	0.739041	-4.78437	NO
Gm28635	-0.326853	-5.54292	-1.29312	0.21237	0.792663	-4.78671	NO
Ctns	0.211713	5.37884	2.2045	0.0407827	0.561345	-4.78741	NO
Abcb7	-0.214413	6.1993	-2.20145	0.0410314	0.561485	-4.78749	NO
Aadac	-0.326599	-5.53169	-1.29266	0.212526	0.792663	-4.78781	NO
Cdc26	-0.211576	5.42091	-2.18892	0.0420679	0.565218	-4.79002	NO
Zbtb16	1.00161	-0.232635	1.64839	0.116669	0.699435	-4.79115	NO
Dtymk	-0.311807	6.21403	-2.21476	0.0399571	0.558189	-4.79152	NO
Ucn	1.07881	-5.18367	1.41823	0.173256	0.757581	-4.7928	NO
Slc9a1	-0.168928	6.73761	-2.21879	0.0396367	0.557518	-4.79423	NO
Fam180a	1.43469	2.94372	1.94456	0.0676721	0.616016	-4.79467	NO
Kctd14	0.742669	3.95516	2.06669	0.0535025	0.595965	-4.79483	NO
Nkx1-2	-0.581895	-3.23324	-1.47618	0.157227	0.743719	-4.79753	NO
Olfr675	0.4119	-1.32121	1.58262	0.130973	0.718155	-4.79806	NO
Lpxn	0.384112	1.59554	1.83138	0.0836976	0.652178	-4.79824	NO
Abca1	0.504954	6.7903	2.21778	0.0397167	0.557518	-4.79853	NO
Stim1	0.273803	6.00728	2.21686	0.0397896	0.557518	-4.79947	NO
Atp6v1h	0.303728	5.13966	2.16926	0.0437417	0.569551	-4.79991	NO
Upb1	0.993424	1.09623	1.76001	0.0954403	0.673281	-4.80035	NO
Gm38100	0.771254	-0.956603	1.62005	0.122659	0.703534	-4.80094	NO
Olfm1	-0.689785	3.7127	-2.05466	0.0547687	0.598128	-4.80112	NO
Paqr9	0.990439	-2.27055	1.52111	0.145658	0.739041	-4.80154	NO
Amn1	-0.358197	3.06151	-1.92785	0.0698512	0.622169	-4.80213	NO
Fgd2	-0.754055	1.84415	-1.84023	0.0823329	0.647698	-4.80282	NO
Xkr8	-0.321031	2.52685	-1.91644	0.0713761	0.622874	-4.80321	NO
Trim30b	0.59269	-0.173539	1.67658	0.110958	0.69223	-4.80352	NO
Gm5415	0.390992	-0.477394	1.64965	0.116409	0.699435	-4.80384	NO
Gcsam	-0.464841	-2.06876	-1.55649	0.137051	0.727722	-4.80385	NO
Il1a	-0.776029	1.34324	-1.8219	0.0851805	0.655775	-4.80413	NO
Olfr1484	-0.356243	-0.837351	-1.6401	0.118395	0.699435	-4.80755	NO
Atp8a1	-0.446716	5.21126	-2.16996	0.043681	0.56928	-4.80824	NO
Soga1	-0.28861	4.64976	-2.14496	0.0458948	0.57448	-4.80827	NO
Iah1	-0.330264	4.28823	-2.07323	0.0528259	0.593868	-4.80854	NO
Snap91	-0.33008	-5.48502	-1.29767	0.210833	0.791147	-4.80907	NO
Tbx22	0.815703	-5.17609	1.39295	0.180652	0.765446	-4.80915	NO
Ercc4	-0.245954	4.07745	-2.08123	0.0520081	0.590166	-4.80996	NO
Olfr77	-0.404293	0.462328	-1.72982	0.100824	0.677021	-4.81091	NO
Gpr182	-0.525318	0.36196	-1.68987	0.108349	0.686846	-4.81108	NO
Gm10662	0.964138	-2.64498	1.47474	0.15761	0.743719	-4.81143	NO
Gm5891	0.964138	-2.64498	1.47474	0.15761	0.743719	-4.81143	NO
Apol8	0.51366	-1.621	1.55171	0.138189	0.729534	-4.81185	NO
Ccdc175	-0.328328	-5.52354	-1.29443	0.211928	0.792663	-4.81186	NO
Gm14226	-0.393997	-0.268525	-1.67914	0.110451	0.690785	-4.81205	NO
Mlip	1.53482	-2.78933	1.49273	0.152881	0.739702	-4.81255	NO
Manbal	-0.243007	4.77796	-2.12979	0.0472871	0.575981	-4.81313	NO
Ttyh1	-0.978411	2.34701	-1.89813	0.0738831	0.627458	-4.81347	NO
Cpa4	0.668154	-1.61114	1.49409	0.152527	0.739583	-4.81599	NO
Cstf2	-0.278722	7.99486	-2.22443	0.0391927	0.557044	-4.81691	NO
Gm10337	-0.885305	-3.7439	-1.43306	0.169031	0.754386	-4.81716	NO
Prelid3a	-0.771268	-1.99133	-1.54798	0.139081	0.729589	-4.81747	NO
Olfr104-ps	0.46124	-2.75042	1.45013	0.164277	0.750453	-4.81822	NO
Trim63	1.65793	-3.34113	1.45638	0.16256	0.748244	-4.8193	NO
Kdm6a	-0.235268	6.15666	-2.1942	0.0416279	0.564274	-4.81958	NO
Anxa8	0.775278	8.03753	2.17548	0.0432056	0.565894	-4.81988	NO
Fbxo32	0.625483	4.65586	2.10529	0.0496186	0.581216	-4.82031	NO
Irak2	0.349588	4.60981	2.13205	0.0470774	0.575981	-4.82112	NO
Esr1	-0.409936	3.39635	-1.96268	0.0653772	0.613706	-4.82151	NO
Olfr1107	-0.683758	-5.16459	-1.36744	0.188373	0.771466	-4.82167	NO
Fam149a	-0.33668	5.45482	-2.15875	0.0446613	0.573315	-4.82292	NO
Efs	-0.491353	5.17224	-2.10995	0.0491665	0.581033	-4.82394	NO
Fam53a	-0.306954	5.36609	-2.12751	0.0475	0.575981	-4.82402	NO
Fcmr	-0.919554	-4.48746	-1.38938	0.181716	0.765722	-4.8257	NO
Foxp3	-0.545532	0.229167	-1.67602	0.111069	0.69223	-4.82686	NO
Slc6a11	-0.708099	-5.31581	-1.36658	0.188636	0.771466	-4.82687	NO
Rbm10	-0.20925	6.96788	-2.21083	0.0402719	0.559412	-4.82733	NO
Olfr1297	0.405367	-0.12322	1.5973	0.127658	0.711835	-4.82805	NO
Ttyh3	-0.292563	7.2972	-2.19159	0.041845	0.565218	-4.82941	NO
Kcnj6	-0.962363	-4.56613	-1.3935	0.180488	0.765446	-4.83033	NO
Mro	-0.594424	-3.9782	-1.38511	0.182997	0.765722	-4.83086	NO
Krt77	0.634514	-5.21568	1.36687	0.188547	0.771466	-4.8316	NO
Ttll7	0.573179	5.04658	2.12828	0.0474276	0.575981	-4.83318	NO
Lonrf2	-1.1165	-3.74926	-1.42772	0.170544	0.755571	-4.83439	NO
Ap4b1	-0.25496	4.398	-2.08444	0.0516837	0.589797	-4.83451	NO
Caml	-0.332501	4.69532	-2.10025	0.0501104	0.581397	-4.83566	NO
Ccdc160	-1.3462	-4.36535	-1.39677	0.179519	0.765446	-4.8367	NO
Gal3st2	1.10693	-2.47063	1.50428	0.149905	0.739219	-4.83716	NO
Abcc10	-0.29086	4.06564	-2.05517	0.054715	0.598128	-4.83925	NO
Hcfc2	0.283176	4.54523	2.10303	0.0498384	0.581216	-4.83965	NO
Rpl10l	-0.892155	-4.60601	-1.39241	0.180813	0.765446	-4.84036	NO
Acot6	-0.44724	1.67651	-1.8103	0.0870266	0.661205	-4.84062	NO
Smim22	0.334241	3.57392	1.99403	0.0615706	0.608004	-4.84102	NO
Crtc3	-0.316528	5.47185	-2.16077	0.0444828	0.57285	-4.8424	NO
Gm3002	0.961876	-1.11352	1.51079	0.148251	0.739067	-4.84273	NO
Slc22a2	-1.26029	-3.84104	-1.42393	0.171621	0.757004	-4.84412	NO
Gm20403	-0.456583	-0.600943	-1.60812	0.125259	0.709192	-4.84419	NO
B4galt3	-0.284619	6.40932	-2.19343	0.041692	0.564274	-4.84432	NO
Jpt2	-0.197769	7.41255	-2.19673	0.0414193	0.563165	-4.84461	NO
Syne4	-0.505706	4.00761	-2.05312	0.0549329	0.598128	-4.84514	NO
Il21	-0.646541	-4.47236	-1.37697	0.185457	0.76952	-4.84518	NO
Nipa2	0.22811	5.31998	2.14449	0.0459373	0.57448	-4.84543	NO
Cyp4a10	0.786116	-4.65575	1.38694	0.182448	0.765722	-4.84589	NO
Trpm1	0.78794	-4.77575	1.39745	0.179318	0.765446	-4.84634	NO
Npas4	-0.892682	-2.07846	-1.51911	0.146155	0.739067	-4.84652	NO
Krt13	0.677716	-4.54986	1.35803	0.191285	0.772108	-4.84736	NO
Lce1b	-0.319985	-5.48949	-1.25509	0.225546	0.802566	-4.84868	NO
Prss52	0.445255	-5.20922	1.32273	0.202536	0.782071	-4.84872	NO
Col17a1	1.33002	4.80884	2.01792	0.0588045	0.60607	-4.84954	NO
Sp8	-0.77077	-3.32868	-1.38698	0.182436	0.765722	-4.85212	NO
Vmn1r208	0.488419	0.232565	1.68645	0.109015	0.687617	-4.85228	NO
Glrp1	0.697257	-0.759373	1.59795	0.127513	0.711817	-4.85326	NO
Zfp580	0.334354	2.81758	1.88561	0.0756431	0.63195	-4.85341	NO
Lrrc31	1.06633	-2.26966	1.52667	0.144275	0.738187	-4.85351	NO
Pacrg	0.88585	-0.179861	1.65384	0.115546	0.699243	-4.85374	NO
Mfng	-0.536047	1.97203	-1.84433	0.0817086	0.645524	-4.85388	NO
Rbsn	0.219324	5.11076	2.12487	0.0477471	0.575981	-4.85426	NO
B4galt6	0.67671	5.20794	2.13218	0.0470653	0.575981	-4.8545	NO
Khdc3	1.07325	-4.46416	1.38784	0.182177	0.765722	-4.85461	NO
Hpse2	0.684685	-4.3623	1.33879	0.197353	0.778757	-4.85516	NO
Cntd1	1.03654	0.0276675	1.58581	0.130245	0.71803	-4.8552	NO
Wdr45	-0.257852	5.8227	-2.1848	0.0424137	0.565218	-4.85604	NO
Dpysl5	-0.621102	5.99682	-2.16883	0.043779	0.569551	-4.85749	NO
Agrp	-0.651969	-0.76928	-1.59776	0.127554	0.711817	-4.85834	NO
Radx	0.642377	-0.73602	1.58231	0.131042	0.718155	-4.85854	NO
Tmem177	-0.323533	3.46115	-1.97016	0.0644497	0.611923	-4.85911	NO
Tulp2	0.410339	-1.51029	1.52075	0.145746	0.739041	-4.85957	NO
Kcng4	-0.367584	-5.24269	-1.2886	0.213903	0.793694	-4.85984	NO
Nefh	-0.546788	-0.199089	-1.63262	0.119972	0.700205	-4.86031	NO
Cdh10	-0.405713	-4.90031	-1.2958	0.211464	0.79212	-4.86043	NO
Tmprss9	-0.709485	-1.48374	-1.50806	0.148942	0.739094	-4.86051	NO
Hacl1	0.696493	1.34268	1.77595	0.0926995	0.669667	-4.8612	NO
Lect2	-0.616402	-5.21506	-1.28426	0.215385	0.794299	-4.86143	NO
Gatc	-0.29596	4.98097	-2.10962	0.0491985	0.581033	-4.86169	NO
Surf2	-0.258696	3.89373	-1.99087	0.0619454	0.608004	-4.86246	NO
Ubtfl1	0.38776	-1.37279	1.5379	0.141518	0.733985	-4.8631	NO
Ctsc	0.453514	7.18907	2.19375	0.0416658	0.564274	-4.86412	NO
Commd2	-0.206713	3.5619	-1.9468	0.0673843	0.616016	-4.86447	NO
Fahd1	-0.26991	3.54232	-2.0038	0.0604249	0.608004	-4.86497	NO
Duox2	0.498856	-1.16297	1.57065	0.133728	0.720933	-4.86529	NO
Syne3	-0.353209	2.589	-1.87975	0.0764789	0.632004	-4.86652	NO
Tmem53	-0.358148	3.00784	-1.90641	0.0727391	0.625692	-4.86723	NO
B2m	0.610255	10.2503	2.17746	0.0430359	0.565894	-4.86828	NO
Vmn1r201	0.409605	-0.252153	1.64507	0.117357	0.699435	-4.86868	NO
Klri1	0.624482	-5.11703	1.31607	0.204715	0.784008	-4.86923	NO
Ap3b1	-0.232334	6.28026	-2.15972	0.0445757	0.57285	-4.86927	NO
Pfkp	-0.35636	7.5706	-2.18421	0.042463	0.565218	-4.87059	NO
Gm45521	-0.367972	-5.36784	-1.28381	0.215537	0.794411	-4.87069	NO
Col13a1	-0.65641	1.16077	-1.76161	0.0951613	0.673281	-4.87074	NO
Tmem40	0.619211	3.54379	1.92587	0.0701132	0.622169	-4.87123	NO
Olfr1123	0.653403	-1.94661	1.49483	0.152335	0.739219	-4.87292	NO
Cysltr1	0.417507	1.49081	1.76762	0.0941233	0.672645	-4.87368	NO
Cers4	0.528899	1.44629	1.74008	0.0989651	0.675032	-4.87389	NO
Trim55	0.736506	-0.739782	1.59537	0.12809	0.713015	-4.87405	NO
Kif3c	-0.347207	5.39478	-2.14271	0.046099	0.57448	-4.87412	NO
F7	0.653275	-1.298	1.5106	0.148299	0.739067	-4.87431	NO
S1pr4	-0.362067	-0.946805	-1.51527	0.147119	0.739067	-4.87452	NO
Uhmk1	-0.178237	6.80428	-2.14778	0.0456395	0.57448	-4.875	NO
Il1rl1	0.566608	1.20014	1.73232	0.100369	0.675318	-4.87515	NO
Ubc	-0.299603	10.235	-2.18332	0.042538	0.565218	-4.87527	NO
Ccser1	1.0044	-0.941793	1.57447	0.132843	0.719675	-4.87671	NO
Il2	0.658366	-3.46924	1.41511	0.174154	0.757777	-4.87853	NO
Gm3604	-0.461775	3.1945	-1.93359	0.0690952	0.619926	-4.8787	NO
Ciart	-0.617153	3.29621	-1.90297	0.0732129	0.626339	-4.87893	NO
Zfp959	-0.307654	3.4549	-1.97312	0.0640869	0.611705	-4.87963	NO
Polr1c	-0.19856	5.52954	-2.13221	0.0470626	0.575981	-4.87968	NO
Mapk10	-0.832516	-1.81502	-1.50175	0.150554	0.739219	-4.87996	NO
Upp2	-1.05311	-4.79287	-1.35522	0.192161	0.772826	-4.88038	NO
Cstdc5	0.764663	-1.69106	1.44701	0.165138	0.750849	-4.88053	NO
Fbxw21	0.604135	-3.73281	1.32717	0.201092	0.779758	-4.88118	NO
Oprd1	-0.848236	-2.02393	-1.51622	0.14688	0.739067	-4.88156	NO
Aven	-0.214202	4.33804	-2.04575	0.055724	0.600503	-4.88353	NO
Mcpt1	-1.06476	-4.00228	-1.35504	0.192218	0.772826	-4.88416	NO
Klhl42	-0.695861	5.49403	-2.10815	0.0493404	0.581033	-4.88442	NO
Higd1c	0.475299	-5.2205	1.29199	0.212753	0.792779	-4.88467	NO
Ccdc183	-0.664894	-2.60549	-1.41119	0.17529	0.759043	-4.88529	NO
Gpc5	0.774536	-3.08117	1.42502	0.171311	0.756453	-4.88533	NO
Mrgpra2a	-0.914474	-4.71973	-1.31055	0.206534	0.786811	-4.88593	NO
Acot12	0.729876	-1.85064	1.46194	0.161048	0.746559	-4.88627	NO
Slc19a1	-0.448256	3.10363	-1.92959	0.0696217	0.622169	-4.88644	NO
Tekt1	-0.953976	-4.05802	-1.3757	0.185844	0.769968	-4.88679	NO
Grip2	1.45548	-3.58668	1.41827	0.173244	0.757581	-4.88686	NO
Zfp534	-1.38128	-4.20742	-1.38831	0.182037	0.765722	-4.88709	NO
Erfe	-0.508134	5.08457	-2.12561	0.0476775	0.575981	-4.88715	NO
Ttc38	0.241748	3.75321	1.99579	0.0613627	0.608004	-4.88771	NO
Wdr89	-0.322581	2.6051	-1.86442	0.078704	0.636322	-4.88804	NO
Olfr1228	0.722814	-5.23477	1.3195	0.203588	0.783996	-4.88841	NO
Spry4	-0.531322	3.8908	-2.02428	0.0580876	0.60607	-4.88894	NO
Snx30	-0.190068	5.10034	-2.05098	0.0551614	0.598128	-4.88971	NO
Olfr1029	-0.574327	-2.42277	-1.47631	0.157192	0.743719	-4.88981	NO
Iffo1	1.11005	-2.80548	1.46338	0.160658	0.74647	-4.88985	NO
Mc2r	-0.436703	-5.07377	-1.2439	0.229539	0.804096	-4.89006	NO
Serpinb11	-1.17775	-4.63724	-1.36126	0.190281	0.771466	-4.89061	NO
Nudt11	0.992049	1.94367	1.77155	0.0934491	0.671265	-4.89076	NO
Prorsd1	0.257903	3.18057	1.91273	0.0718776	0.624321	-4.89112	NO
Lce1a1	-0.317768	-5.04645	-1.21924	0.238535	0.80991	-4.8912	NO
Gcgr	-0.940157	-3.44407	-1.39599	0.179749	0.765446	-4.89249	NO
Azgp1	-0.317599	-5.26273	-1.19836	0.246364	0.815595	-4.89251	NO
Mapt	0.734197	1.46192	1.74036	0.0989149	0.675032	-4.89252	NO
Cks1brt	-0.514446	-3.30101	-1.36492	0.189149	0.771466	-4.89282	NO
Igf2bp1	1.83349	-1.0155	1.54744	0.139211	0.729589	-4.89347	NO
Chac2	0.287741	2.55128	1.87284	0.0774747	0.633778	-4.89369	NO
C8g	-0.266678	0.808356	-1.67921	0.110436	0.690785	-4.89423	NO
Foxd4	-0.898695	-4.71455	-1.33415	0.19884	0.779758	-4.8943	NO
Lin7b	0.614818	-1.83454	1.48614	0.154598	0.742044	-4.89479	NO
Gm48551	-0.826194	-3.12463	-1.41269	0.174854	0.758489	-4.89533	NO
Selenbp1	-0.658466	3.34419	-1.91653	0.0713635	0.622874	-4.89556	NO
Dnase1	1.01374	-2.22515	1.49617	0.15199	0.739219	-4.89591	NO
Fbxo16	0.987322	-2.82464	1.42201	0.17217	0.757314	-4.89594	NO
Cry1	-0.279019	4.90258	-2.09259	0.0508666	0.586013	-4.89721	NO
Lmbrd2	0.302432	5.69035	2.10354	0.0497889	0.581216	-4.89761	NO
Gm47969	0.673678	-3.41316	1.41484	0.174233	0.757798	-4.8989	NO
Tmem26	-0.637671	-1.16144	-1.47958	0.156326	0.742698	-4.89925	NO
Tdrd9	0.437622	-2.55078	1.37148	0.187132	0.771346	-4.89951	NO
Zscan5b	-0.503793	-5.08821	-1.27549	0.2184	0.79662	-4.901	NO
Tomm34	-0.19089	5.9878	-2.12448	0.0477839	0.575981	-4.90136	NO
Fbp1	-0.918876	-0.550076	-1.57407	0.132936	0.719675	-4.90273	NO
Ttc30a2	-0.467973	-0.429951	-1.60338	0.126306	0.710277	-4.90344	NO
Itprid2	0.620582	3.7608	1.98845	0.0622333	0.608004	-4.90419	NO
Cpz	-0.549884	-0.706325	-1.47563	0.157373	0.743719	-4.90485	NO
Btnl4	-0.312663	-5.41542	-1.1787	0.253909	0.821267	-4.90495	NO
Sdhaf1	-0.278841	3.61612	-1.95689	0.0661028	0.616016	-4.90513	NO
Palm3	0.855552	-1.9788	1.46831	0.15933	0.745921	-4.90528	NO
Etfbkmt	-0.352884	3.70393	-1.884	0.075871	0.632004	-4.90555	NO
BC035044	0.723019	-2.90369	1.38615	0.182685	0.765722	-4.90576	NO
Mmab	-0.229618	4.06638	-2.00836	0.0598976	0.608004	-4.90583	NO
Tulp1	1.38244	1.03024	1.68694	0.10892	0.687617	-4.90612	NO
Kcne1	-0.32995	-5.46394	-1.21749	0.239184	0.810057	-4.90646	NO
Rbck1	-0.204516	6.70762	-2.16639	0.043991	0.570801	-4.90665	NO
Gm42517	-1.12298	-3.25061	-1.39915	0.178815	0.765446	-4.90673	NO
Dnah7c	-0.703277	-1.77058	-1.50102	0.15074	0.739219	-4.90705	NO
Cdkal1	-0.190996	4.47204	-2.03268	0.0571521	0.605821	-4.90747	NO
Gm12166	-0.28617	-5.65513	-1.19495	0.24766	0.816283	-4.90793	NO
Zfp408	-0.215986	4.19882	-1.99916	0.0609668	0.608004	-4.90819	NO
Mon2	0.219752	5.17355	2.09932	0.0502019	0.581397	-4.90868	NO
Khsrp	-0.150088	8.10106	-2.13288	0.0470002	0.575981	-4.91003	NO
Gltpd2	0.927174	-4.38671	1.35835	0.191186	0.772108	-4.91068	NO
Gm13285	-0.45076	2.41588	-1.8126	0.086657	0.661205	-4.91171	NO
Pde6b	-0.468304	-4.91663	-1.2375	0.23185	0.804787	-4.91266	NO
Afap1	0.32285	6.89597	2.14374	0.0460046	0.57448	-4.91309	NO
Csad	-0.295318	5.67438	-2.08838	0.0512872	0.587091	-4.91355	NO
Cdk7	-0.27621	4.53735	-2.0447	0.0558371	0.600503	-4.91533	NO
Gm43552	-0.290029	-5.43445	-1.19276	0.248494	0.817783	-4.91588	NO
Ccl20	-0.644897	2.76907	-1.84643	0.081389	0.64548	-4.91632	NO
Gid8	-0.174613	5.67041	-2.10835	0.0493217	0.581033	-4.91688	NO
Vmn2r114	-0.310048	-5.18001	-1.18516	0.25141	0.819987	-4.91705	NO
Ehbp1l1	0.384998	6.11768	2.14387	0.045993	0.57448	-4.91754	NO
Gm45208	0.691941	-5.27209	1.27301	0.21926	0.797005	-4.91909	NO
Rpl7a	-0.33244	8.80524	-2.14593	0.0458069	0.57448	-4.91967	NO
Ssna1	-0.325309	5.21623	-2.10103	0.0500337	0.581273	-4.9197	NO
Dnaaf1	-0.802257	-1.70536	-1.49355	0.152667	0.739593	-4.92017	NO
Cetn2	-0.25131	5.54712	-2.13321	0.0469702	0.575981	-4.92069	NO
Kcnc3	-0.523217	0.544381	-1.63512	0.119442	0.699435	-4.92078	NO
Arhgef37	-0.336866	2.93216	-1.85461	0.0801584	0.641528	-4.92112	NO
A4gnt	0.810307	-5.1769	1.30283	0.209103	0.789673	-4.92148	NO
Olfr735	0.284191	2.15541	1.75103	0.0970144	0.673525	-4.92197	NO
Csdc2	-0.896975	4.19697	-1.97879	0.0633946	0.610154	-4.92241	NO
Tsc2	-0.206747	7.21959	-2.16	0.0445511	0.57285	-4.92319	NO
Sox1	0.603296	-3.58551	1.35103	0.193473	0.774208	-4.92366	NO
Otop1	1.35698	-3.75339	1.37277	0.186736	0.77107	-4.9253	NO
Gm16223	-0.603025	-2.55476	-1.44945	0.164463	0.750453	-4.92542	NO
Plekhg5	-0.339461	5.87545	-2.14543	0.0458518	0.57448	-4.92625	NO
Kctd7	-0.276292	3.13195	-1.8951	0.0743055	0.627458	-4.92666	NO
Dedd	-0.171499	6.01976	-2.12117	0.0480954	0.578157	-4.92709	NO
Olfr559	-0.730835	-5.06873	-1.28739	0.214314	0.793694	-4.92723	NO
Klra2	0.62699	0.729032	1.68558	0.109186	0.688404	-4.9293	NO
Pik3r1	-0.337761	7.58274	-2.15181	0.0452775	0.57448	-4.92979	NO
Ranbp3l	0.38878	-3.00474	1.40294	0.1777	0.762939	-4.93055	NO
Zc3h12d	0.349517	1.16267	1.66812	0.112647	0.695041	-4.93161	NO
Fbxw5	-0.197209	5.1375	-2.07263	0.0528874	0.593868	-4.93163	NO
Plod1	-0.326145	6.14089	-2.13359	0.0469349	0.575981	-4.93304	NO
Slc25a47	-0.430794	1.81345	-1.76086	0.0952931	0.673281	-4.9335	NO
Foxa2	0.776413	-1.4787	1.47411	0.157778	0.743856	-4.93367	NO
Ceacam10	-0.979778	-4.72046	-1.28974	0.213515	0.793694	-4.9358	NO
Apobec1	0.489165	4.89451	2.08441	0.0516862	0.589797	-4.93581	NO
Mapk15	0.650429	2.05364	1.76244	0.0950179	0.673281	-4.93614	NO
Prr33	1.4814	3.38362	1.90256	0.0732688	0.626455	-4.93689	NO
Gpat3	0.444836	2.73014	1.84985	0.0808724	0.642994	-4.9379	NO
B3gnt4	-0.604121	-2.1923	-1.42003	0.172737	0.757314	-4.93905	NO
Stk16	-0.252465	4.11809	-1.99747	0.0611654	0.608004	-4.93951	NO
Cspg4	1.53908	3.75736	1.93274	0.0692075	0.620096	-4.94017	NO
AW549877	0.287659	5.99411	2.13481	0.0468217	0.575981	-4.94052	NO
C1ql2	0.816592	-1.7558	1.45271	0.163566	0.74937	-4.94117	NO
Gm3029	0.968297	-4.92794	1.28681	0.214514	0.793694	-4.9428	NO
Agbl4	-0.315513	-1.47888	-1.43012	0.169863	0.754386	-4.94362	NO
Ube2e3	-0.173051	5.92379	-2.10652	0.0494982	0.581216	-4.94421	NO
Trmt2b	-0.259166	4.64801	-2.06929	0.0532328	0.595031	-4.9445	NO
Slc6a15	1.57711	-0.484772	1.55619	0.137123	0.727722	-4.94471	NO
Fcho1	-0.404368	3.27539	-1.8924	0.074684	0.62836	-4.94484	NO
Aamdc	0.257369	3.11211	1.88251	0.0760832	0.632004	-4.94586	NO
Zbtb22	-0.165821	5.58798	-2.10118	0.0500192	0.581273	-4.94605	NO
Il10	1.35693	-0.393604	1.55822	0.136641	0.727339	-4.94626	NO
Tex50	0.543178	-4.98451	1.26708	0.221325	0.797821	-4.94693	NO
Olfr118	0.327042	-2.16819	1.4195	0.172891	0.757314	-4.94739	NO
Ehmt2	-0.193379	7.76569	-2.13515	0.0467911	0.575981	-4.94833	NO
Cacng2	0.64625	-3.0698	1.31925	0.203671	0.783996	-4.94917	NO
Cdkn1b	0.357688	8.29338	2.14012	0.0463345	0.574937	-4.94955	NO
Wdsub1	-0.194861	4.53243	-1.9929	0.0617046	0.608004	-4.94995	NO
Selenow	0.291273	6.62405	2.11021	0.0491416	0.581033	-4.94998	NO
Bsnd	0.803832	-4.97634	1.26087	0.223503	0.800633	-4.95041	NO
Apobec2	1.38229	1.86086	1.72805	0.101147	0.677328	-4.95097	NO
Vwa5a	0.265568	6.03066	2.11439	0.0487406	0.580443	-4.95171	NO
Crisp2	0.866039	-4.05887	1.34288	0.19605	0.776316	-4.95233	NO
Palm	-0.395197	5.82105	-2.11884	0.0483168	0.578157	-4.95269	NO
Olfr1097	0.905069	-3.30174	1.37448	0.186215	0.77004	-4.95316	NO
Sap30	-0.38636	5.42981	-2.09708	0.050422	0.583081	-4.95455	NO
Olfr381	-0.386182	-1.35642	-1.48818	0.154065	0.741016	-4.95486	NO
Ppp4r4	-0.511972	2.37811	-1.75423	0.0964512	0.673281	-4.9552	NO
Pip4k2a	-0.210066	4.92446	-2.05615	0.0546102	0.598128	-4.95521	NO
Fzd10	0.594996	-0.314635	1.5176	0.146534	0.739067	-4.95534	NO
Mall	0.439161	3.27364	1.9137	0.0717461	0.624057	-4.95617	NO
Rasl2-9	0.565455	-3.11854	1.36527	0.189039	0.771466	-4.95676	NO
Ankrd40	0.143839	6.21748	2.12522	0.0477141	0.575981	-4.95717	NO
C9orf72	-0.303849	4.84971	-2.065	0.0536789	0.595965	-4.9575	NO
Gm30083	-0.809487	-4.47907	-1.26852	0.22082	0.797568	-4.95768	NO
Olfr733	0.510033	-2.31106	1.43433	0.168675	0.753798	-4.95782	NO
Syt12	-0.410645	4.33107	-1.98043	0.0631965	0.609628	-4.958	NO
Eno1	-0.476385	10.098	-2.15486	0.0450059	0.57448	-4.95853	NO
Kcnj12	0.585662	-0.0771286	1.55105	0.138345	0.729534	-4.95927	NO
Rpl36a	-0.251132	7.09603	-2.14806	0.0456141	0.57448	-4.95954	NO
B3gat1	1.11204	-3.47746	1.35579	0.191982	0.772826	-4.95997	NO
Stoml2	-0.271838	6.1999	-2.12528	0.0477085	0.575981	-4.96004	NO
[truncated: 12,767 more rows]

## Sheet: Table S4_GTPs_DEGs
Genes	LogFC	AveExpr	t	P.Value	Adj.P.Val	B	Significant
Mtmr11	6.57181	-2.6325	8.27173	1.55216e-07	0.000763971	6.24399	Upregulated
Slc26a10	4.00153	-2.32934	6.17528	7.99299e-06	0.0152939	3.12379	Upregulated
Wfdc12	3.81523	0.54913	4.66323	0.000194875	0.0754161	0.868076	Upregulated
Prol1	3.3453	-4.45237	5.77736	1.8048e-05	0.0199167	1.86824	Upregulated
Kcnq5	3.00036	0.0451049	5.75554	1.88835e-05	0.0199167	2.93702	Upregulated
Sec14l4	2.76591	-1.60219	5.85394	1.54055e-05	0.0199167	2.97939	Upregulated
Ntng1	2.75135	3.45824	5.7906	1.75599e-05	0.0199167	3.05826	Upregulated
Crisp1	2.68087	-3.79689	5.29277	4.99714e-05	0.0320817	1.68224	Upregulated
Spata22	2.65039	-4.36343	8.67106	7.82383e-08	0.000589786	5.94984	Upregulated
Gpa33	2.47308	-0.27768	4.59884	0.000224428	0.080827	0.733445	Upregulated
Armc3	2.38357	-3.70852	5.47155	3.42095e-05	0.0265861	1.98794	Upregulated
Rxfp4	2.27822	-4.4529	4.49062	0.000284721	0.0927472	0.29636	Upregulated
Cfap46	2.26832	-4.24243	7.72633	4.08946e-07	0.00147217	4.88441	Upregulated
Pitx3	2.24993	-3.98485	5.51503	3.12147e-05	0.0265861	1.97276	Upregulated
Dio1	2.18561	-4.72078	6.69635	2.83937e-06	0.0069877	3.5883	Upregulated
Arr3	1.91502	-4.53524	4.61245	0.000217822	0.0804091	0.501261	Upregulated
Gm49835	1.83426	-5.16212	5.17611	6.4114e-05	0.0364118	1.43562	Upregulated
Olfr633	1.83194	-5.04342	5.14637	6.83358e-05	0.0370427	1.22922	Upregulated
Cers3	1.68202	2.10763	4.66929	0.000192307	0.0754161	0.848147	Upregulated
Slc39a4	1.67792	2.94188	5.19488	6.15883e-05	0.0363765	1.87782	Upregulated
Kel	1.49882	-4.95866	5.55465	2.87205e-05	0.0265861	1.76168	Upregulated
Fat2	1.49758	4.03783	5.40213	3.96155e-05	0.0289585	2.24594	Upregulated
Slc25a21	1.22207	-4.75704	4.46317	0.000302477	0.0927472	0.00828901	Upregulated
Tbx18	1.07666	4.14971	5.13355	7.02422e-05	0.0370427	1.62327	Upregulated
Amigo2	1.0675	2.25676	4.46512	0.000301178	0.0927472	0.40431	Upregulated
Tcaf2	0.916536	4.62364	4.90523	0.00011498	0.056593	1.01991	Upregulated
Cadps2	0.775193	5.64068	5.19508	6.15618e-05	0.0363765	1.5746	Upregulated
Trim2	0.74369	6.3095	7.61749	4.98499e-07	0.00147217	6.43774	Upregulated
Trpv6	0.676788	6.93259	4.77372	0.000153061	0.0706282	0.671044	Upregulated
Add3	0.378847	6.91007	5.48251	3.34277e-05	0.0265861	2.19311	Upregulated
Ctnnal1	-0.693564	5.81157	-4.46927	0.000298437	0.0927472	-0.0146273	Downregulated
Ntmt1	-0.712667	3.34332	-4.65323	0.000199189	0.0754161	0.6869	Downregulated
Coro2a	-0.737937	5.49627	-4.45529	0.000307775	0.0927472	0.035846	Downregulated
Trpm3	-0.825378	1.73392	-4.73228	0.000167555	0.0749734	0.985768	Downregulated
Npffr1	-0.935797	0.214336	-4.68335	0.000186478	0.0754161	0.900744	Downregulated
Garnl3	-0.969569	2.65393	-4.67082	0.000191664	0.0754161	0.794944	Downregulated
Foxs1	-1.09687	0.544504	-4.50873	0.000273592	0.091815	0.556579	Downregulated
Bend5	-1.13259	3.21506	-5.35363	4.3906e-05	0.0294689	2.20138	Downregulated
Egln3	-1.20701	6.43282	-6.09937	9.32178e-06	0.0152939	3.47231	Downregulated
Pde6a	-1.40156	0.21247	-4.5455	0.000252332	0.0887128	0.63149	Downregulated
Cmtm5	-1.43397	-5.32905	-4.94909	0.000104552	0.0532349	0.411048	Downregulated
Lmx1b	-1.59953	5.3623	-4.79931	0.000144756	0.0689507	0.78841	Downregulated
Lamp5	-1.70001	-5.11484	-5.51787	3.10292e-05	0.0265861	1.83095	Downregulated
Nrsn1	-1.78886	-5.17643	-5.3838	4.11844e-05	0.0289585	1.5223	Downregulated
Mettl7b	-2.13289	1.20066	-4.51762	0.000268291	0.091815	0.560776	Downregulated
Clhc1	-2.1397	-3.56754	-4.70629	0.00017735	0.0754161	0.771632	Downregulated
Ccr8	-2.19574	-4.76657	-6.1163	9.00678e-06	0.0152939	2.89846	Downregulated
Gm5796	-2.84903	-4.94247	-8.65875	7.98843e-08	0.000589786	5.41892	Downregulated
Asic1	-3.10836	-4.15953	-5.84904	1.5562e-05	0.0199167	2.59042	Downregulated

## Sheet: Table S5_Comb_Ctrl Transcripts
Genes	LogFC	AveExpr	t	P.Value	Adj.P.Val	B	Significant
Ckm	6.84271	2.69176	13.7801	5.51344e-11	4.69926e-07	15.4626	YES
Neb	5.92823	1.35954	13.0769	1.30168e-10	6.40689e-07	14.5545	YES
Olfr1280	3.719	-5.43075	13.6604	6.36498e-11	4.69926e-07	13.0224	YES
Mstn	8.10231	-3.95269	12.0427	4.94481e-10	1.82538e-06	12.4008	YES
Crhr2	4.33109	-3.52004	11.6698	8.18304e-10	2.41661e-06	11.6976	YES
Sln	6.71025	-3.82598	11.3278	1.31334e-09	2.7704e-06	11.4147	YES
Mylpf	5.30568	2.96894	10.2909	5.91064e-09	9.6974e-06	10.8195	YES
Myadml2	3.7593	-4.70901	11.1046	1.79928e-09	3.32102e-06	10.5755	YES
Gm43552	3.56531	-5.43445	11.4059	1.17773e-09	2.7704e-06	10.2926	YES
Myo18b	6.72401	-3.34296	9.92482	1.03236e-08	1.52439e-05	9.82998	YES
Smyd1	3.99983	-0.0810128	9.37815	2.44074e-08	3.27637e-05	9.42383	YES
Actn3	7.62811	-0.250062	9.04044	4.22555e-08	4.45675e-05	8.92499	YES
Art1	8.17294	-3.22082	9.20722	3.21687e-08	3.65387e-05	8.91267	YES
Prss52	3.26404	-5.20922	9.26994	2.90579e-08	3.57558e-05	8.83715	YES
Pgam2	5.03517	1.26807	8.71153	7.30715e-08	6.74358e-05	8.37847	YES
Asb12	4.76928	-4.64093	8.85871	5.70949e-08	5.62042e-05	8.13494	YES
Klhl31	4.17169	0.0704768	8.54781	9.64519e-08	8.3777e-05	8.12324	YES
Ankrd23	1.97746	3.96636	8.30649	1.46111e-07	0.000114333	7.51535	YES
Myh4	10.4216	0.71223	8.08563	2.1508e-07	0.000151232	7.31026	YES
Sypl2	5.23492	-0.937275	7.95252	2.72351e-07	0.00017305	7.09624	YES
Lrrc38	3.98898	-5.04496	8.16509	1.87013e-07	0.000138072	7.08427	YES
Lrrc30	4.04397	-4.46063	8.30254	1.47117e-07	0.000114333	7.07965	YES
Ldb3	4.21759	1.43679	7.93446	2.81268e-07	0.00017305	7.05443	YES
Slc26a10	5.07105	-2.32934	7.85485	3.24341e-07	0.000191569	6.86985	YES
Boll	-2.78411	-3.54227	-8.05169	2.28376e-07	0.000153282	6.84055	YES
Slc8a3	3.03813	-1.70848	7.69722	4.31125e-07	0.000244846	6.6141	YES
Ppp1r3a	6.98815	-3.40465	7.66473	4.57358e-07	0.000250124	6.52908	YES
Ryr1	3.85271	2.74136	7.52684	5.88588e-07	0.000307798	6.19567	YES
Mybpc1	8.23114	-1.935	7.42588	7.09134e-07	0.000309547	6.18469	YES
Tmem233	6.6964	-3.9114	7.48966	6.30299e-07	0.00030921	6.18084	YES
Asb15	5.06091	-3.586	7.44667	6.82375e-07	0.000309547	6.12938	YES
Mrln	4.65704	-4.86156	7.51234	6.04507e-07	0.000307798	6.1185	YES
Ttn	5.75471	2.87346	7.47367	6.4916e-07	0.00030921	6.05573	YES
Nrap	4.88238	0.403277	7.33606	8.37958e-07	0.000353522	6.00207	YES
Casr	4.51882	-4.70542	7.2488	9.86502e-07	0.000393694	5.68141	YES
Trim2	0.838365	6.3095	7.42313	7.12759e-07	0.000309547	5.67008	YES
Cib3	2.18417	-5.21974	7.27576	9.37881e-07	0.000384688	5.66095	YES
Abra	3.24077	-1.1231	7.11469	1.27029e-06	0.000468927	5.62132	YES
Olfr721-ps1	2.47785	-5.29264	7.18065	1.1214e-06	0.000435754	5.41737	YES
Ampd1	4.97359	-0.588288	6.89329	1.93861e-06	0.000650581	5.20626	YES
Gm49496	2.87575	-5.09045	7.13234	1.22854e-06	0.000465145	5.12836	YES
Hspb7	3.29711	0.203747	6.72589	2.68051e-06	0.000879564	4.89425	YES
Prima1	2.44387	-5.2896	6.98988	1.61078e-06	0.000580115	4.89074	YES
Gm3526	2.81555	-5.0736	6.89826	1.92014e-06	0.000650581	4.86473	YES
Hs3st5	2.46668	-5.48988	6.95041	1.73719e-06	0.000610745	4.80501	YES
Smpx	6.82867	-3.0966	6.64663	3.12917e-06	0.00100446	4.74196	YES
Obscn	5.78179	-0.533736	6.53169	3.92235e-06	0.00120368	4.51364	YES
Fitm1	4.46723	-1.72631	6.40646	5.02734e-06	0.00145556	4.30653	YES
Stmnd1	2.09794	-5.23477	6.52248	3.99433e-06	0.00120368	4.26038	YES
Acsm5	2.35105	-5.31719	6.42664	4.82953e-06	0.00142626	4.24803	YES
Gm8906	2.53528	-5.27124	6.55575	3.74062e-06	0.00117519	4.18781	YES
Cd300e	2.06941	-3.15825	6.27336	6.55983e-06	0.00176113	4.02616	YES
Asb11	5.8189	-3.16569	6.23352	7.10697e-06	0.00184515	3.97398	YES
Sgca	3.04541	-1.01048	6.1976	7.64067e-06	0.00194521	3.89358	YES
Gm5796	-2.48424	-4.94247	-6.28525	6.40513e-06	0.00176113	3.8822	YES
Clec12b	2.40248	-5.31819	6.23242	7.12267e-06	0.00184515	3.80283	YES
Grm6	2.83306	-4.22787	6.27525	6.53502e-06	0.00176113	3.76755	YES
Pla2g4b	-4.94499	0.969636	-6.00821	1.12238e-05	0.00267307	3.54123	YES
Klhl41	4.0548	0.942532	6.05286	1.02467e-05	0.00256445	3.49195	YES
Cadps2	1.13349	5.64068	6.28724	6.37968e-06	0.00176113	3.42774	YES
Tcap	5.19774	1.0575	6.01559	1.10559e-05	0.00267307	3.38128	YES
Eef1a2	6.78547	-1.73007	5.86617	1.50219e-05	0.00352084	3.24033	YES
Gm12887	2.60596	-4.54555	5.84485	1.56969e-05	0.00361974	3.19379	YES
Fsd2	4.70933	-2.63118	5.82395	1.63893e-05	0.00365966	3.18226	YES
Fat2	1.78425	4.03783	6.0445	1.04227e-05	0.00256502	3.12568	YES
Unc45b	2.23633	0.789208	5.81597	1.66619e-05	0.00365966	3.09293	YES
Ano5	6.26979	-3.97102	5.75011	1.90977e-05	0.00402852	3.03587	YES
Pdlim3	3.66357	1.16165	5.83759	1.59341e-05	0.00361974	3.02701	YES
Alx3	2.25907	-4.88785	5.75716	1.88201e-05	0.0040275	2.99749	YES
Capn8	3.64417	-4.04778	5.5832	2.7051e-05	0.00554771	2.7092	YES
Mettl21e	2.69843	-5.06786	5.55601	2.86391e-05	0.00556427	2.64683	YES
Mup2	2.07844	-5.51488	5.66245	2.29195e-05	0.00476661	2.62474	YES
Rpl3l	3.63819	-0.549325	5.5585	2.84897e-05	0.00556427	2.5924	YES
Sgcg	2.53906	-0.283145	5.54085	2.95651e-05	0.00566959	2.55885	YES
Klhl33	1.44136	1.59511	5.56866	2.78888e-05	0.00556427	2.51002	YES
Kcnq5	3.15887	0.0451049	5.5174	3.10596e-05	0.00580539	2.48795	YES
Aurkc	1.81756	-5.06732	5.47644	3.38584e-05	0.00624941	2.45364	YES
Crisp4	1.94056	-4.83675	5.46691	3.45459e-05	0.00629759	2.42289	YES
Csl	-2.19093	-3.33785	-5.45605	3.53472e-05	0.00635289	2.39864	YES
Mylk4	3.06935	0.967164	5.52163	3.07848e-05	0.00580539	2.39379	YES
Ccdc6	0.468416	6.70772	5.81044	1.68534e-05	0.00365966	2.38551	YES
Frmd3	2.61496	-5.03391	5.42081	3.80796e-05	0.0066151	2.3538	YES
Dhrs7c	6.47669	-3.72608	5.35342	4.39259e-05	0.00745528	2.25238	YES
Atp2a1	7.16651	2.90485	5.56739	2.79628e-05	0.00556427	2.24953	YES
Tnnc2	7.48019	1.02464	5.45121	3.57097e-05	0.00635289	2.20777	YES
Armc3	2.6119	-3.70852	5.32339	4.6819e-05	0.00785601	2.19411	YES
Phkg1	3.10743	0.287321	5.30884	4.82913e-05	0.00801202	2.01704	YES
Tas2r143	2.81898	-4.61142	5.22024	5.83356e-05	0.00936286	1.98747	YES
Des	4.32746	3.01422	5.44543	3.6149e-05	0.00635448	1.95713	YES
Cmya5	3.86582	1.85683	5.36877	4.25172e-05	0.00730011	1.94553	YES
Cacna2d4	1.52966	-5.13591	5.1743	6.43635e-05	0.0101106	1.88802	YES
Cox6a2	5.92723	-1.06182	5.1595	6.64376e-05	0.0102189	1.80206	YES
Asb5	3.54953	-1.84878	5.1403	6.92307e-05	0.0105388	1.79291	YES
Lmod3	5.95056	-2.99319	5.1272	7.12065e-05	0.0106206	1.78856	YES
Fbxw10	3.15791	-4.8207	5.11132	7.36777e-05	0.0108793	1.74412	YES
Mcub	1.36532	0.766547	5.18013	6.35642e-05	0.0100924	1.741	YES
Krt81	2.64312	-4.15151	5.09353	7.65501e-05	0.0110095	1.73209	YES
Zap70	-1.84224	-1.69841	-5.09204	7.67963e-05	0.0110095	1.73205	YES
Rbm46	4.09233	-3.95988	5.09314	7.66148e-05	0.0110095	1.72261	YES
Pvalb	9.11396	-1.46693	5.129	7.09315e-05	0.0106206	1.69425	YES
Ctxn3	4.0955	-4.13784	5.06256	8.18284e-05	0.0115074	1.673	YES
Tnnt3	7.30604	2.08819	5.25197	5.45129e-05	0.00884547	1.67116	YES
Cacna1s	7.29936	-2.82314	5.05304	8.35235e-05	0.011635	1.62519	YES
Tbx18	1.28177	4.14971	5.28932	5.03408e-05	0.00825925	1.50871	YES
Sh3bgr	2.26822	-0.19397	4.977	9.84252e-05	0.0135827	1.38717	YES
Rasl12	1.46098	3.20494	5.16565	6.55675e-05	0.0101913	1.34581	YES
Txlnb	4.34748	-1.20184	4.883	0.000120664	0.0160515	1.20192	YES
Osbp2	1.78982	1.8591	4.96144	0.000101795	0.0139176	1.17087	YES
Gcfc2	1.07263	3.40621	5.06851	8.0786e-05	0.0114701	1.13769	YES
Lamp5	-1.75301	-5.11484	-4.73365	0.000167055	0.0211869	1.00848	YES
Lbx1	4.61393	-4.21216	4.7314	0.000167876	0.0211869	0.999499	YES
Mustn1	1.72415	1.96614	4.8626	0.000126131	0.016629	0.994196	YES
Myh6	-2.56278	-2.20804	-4.7174	0.000173092	0.021299	0.974733	YES
C2cd4c	0.801368	2.54015	4.89733	0.000116968	0.0157014	0.94619	YES
Nodal	1.29937	-5.18745	4.69948	0.000180011	0.0217873	0.943698	YES
Asic3	4.15907	-3.04006	4.71769	0.000172983	0.021299	0.925259	YES
Dio1	1.7176	-4.72078	4.64028	0.000204925	0.0245365	0.823265	YES
Fzd10	1.99345	-0.314635	4.71885	0.000172546	0.021299	0.794831	YES
Olfr1344	-2.29394	-4.03139	-4.61911	0.000214665	0.0253579	0.782104	YES
Olfr1428	1.84367	-4.84322	4.61044	0.000218785	0.0256396	0.762878	YES
Gm136	2.30743	-4.87701	4.58825	0.000229707	0.0267075	0.719881	YES
Ildr2	1.83087	1.04351	4.74154	0.000164199	0.0210832	0.694025	YES
Gpa33	2.8721	-0.27768	4.63778	0.00020605	0.0245365	0.660461	YES
Gm8871	2.48019	-4.41991	4.53408	0.000258747	0.0293897	0.599303	YES
Gm9	1.39965	-5.47227	4.51997	0.000266906	0.030085	0.56993	YES
Gm5105	2.46331	-4.25757	4.48866	0.000285956	0.0310472	0.505924	YES
Rps27rt	-5.57811	-1.52085	-4.4848	0.000288399	0.0310839	0.503792	YES
Igfn1	1.79656	-5.16685	4.47525	0.000294531	0.0311914	0.492737	YES
Topaz1	1.74135	-5.02463	4.47506	0.000294651	0.0311914	0.491902	YES
Ntf3	2.32923	-3.27285	4.49244	0.000283587	0.0310472	0.483252	YES
Trpv6	0.817974	6.93259	4.90648	0.000114669	0.015534	0.467678	YES
Trim8	-0.445358	6.7811	-4.85595	0.000127968	0.0167219	0.455325	YES
Kbtbd12	3.37987	-1.55144	4.4734	0.000295733	0.0311914	0.372623	YES
Spata22	1.82996	-4.36343	4.41484	0.000336503	0.0338014	0.367484	YES
Flt4	1.1193	3.60886	4.70679	0.000177154	0.0216186	0.353527	YES
Pate10	1.90668	-5.32265	4.40875	0.000341064	0.0338218	0.339001	YES
Iqca1l	2.74185	-4.92802	4.39214	0.000353805	0.0343703	0.322325	YES
Aldh1a1	3.59849	-1.45443	4.43096	0.000324745	0.0328467	0.302533	YES
Pitx3	2.05573	-3.98485	4.38664	0.000358124	0.0345625	0.301876	YES
Xirp2	6.36921	0.290434	4.49818	0.00028002	0.0310472	0.300533	YES
Gm10197	2.31623	-5.05293	4.36927	0.000372137	0.0356816	0.266894	YES
Tmod3	0.425571	7.48407	4.79565	0.000145918	0.0189002	0.24503	YES
Lctl	1.34503	-0.408311	4.39957	0.000348049	0.034035	0.170239	YES
Prcd	2.95705	-4.13489	4.3341	0.000402235	0.038073	0.153112	YES
Myl1	8.34854	0.304092	4.44317	0.000316116	0.0326417	0.152242	YES
Axdnd1	1.54591	-1.60949	4.3404	0.00039667	0.0377886	0.0569706	YES
Vgll2	4.24016	-4.46168	4.26061	0.000473298	0.0439542	0.0374721	YES
Olfr862	-1.36356	-4.44301	-4.24524	0.000489688	0.0446341	0.0299546	YES
Olfr544	1.45731	-2.05267	4.25136	0.000483094	0.0443066	-0.0392771	YES
Pdk4	2.04561	2.85867	4.46206	0.000303217	0.031754	-0.0462606	YES
Dner	-1.4507	-4.31454	-4.18597	0.00055847	0.0488366	-0.0874684	YES
Wfdc17	1.57938	2.62869	4.4339	0.000322649	0.0328467	-0.0942779	YES
Mrgprb3	2.54679	-4.68272	4.20325	0.000537464	0.0478084	-0.108216	YES
Rnf148	1.64455	-2.49747	4.2003	0.000540998	0.0478346	-0.120785	YES
Gm36368	-2.20422	-3.21498	-4.16942	0.000579364	0.0500286	-0.152663	YES
Abca5	0.523572	4.37734	4.53513	0.000258149	0.0293897	-0.199886	YES
Rab26	-1.17116	1.42953	-4.25677	0.000477336	0.0440522	-0.258677	YES
Slc4a7	0.785867	5.7119	4.55932	0.000244781	0.0282378	-0.265848	YES
Vmn1r223	1.70942	-5.35608	4.09557	0.0006826	0.055078	-0.268082	YES
Slc24a2	3.197	-0.0759926	4.22363	0.000513714	0.0459728	-0.295148	YES
Vmn1r78	1.63453	-2.58257	4.11996	0.000646601	0.0536388	-0.29707	YES
Dgkb	2.02699	-5.01937	4.06356	0.000732924	0.0569598	-0.330843	YES
Plin1	1.66946	0.315244	4.15624	0.000596565	0.0509184	-0.350721	YES
Ifitm6	2.32701	-2.79722	4.10613	0.000666783	0.0548717	-0.353748	YES
Alg3	0.869907	3.77079	4.40845	0.000341287	0.0338218	-0.369929	YES
Gm29106	-2.79556	-2.36992	-4.03404	0.000782636	0.0589613	-0.412294	YES
Cadm3	2.575	-0.0281166	4.16536	0.000584601	0.0501873	-0.435651	YES
Cacng1	3.18906	-1.19662	4.06993	0.000722618	0.0569598	-0.446109	YES
Zrsr1	0.730068	8.77206	4.48899	0.000285748	0.0310472	-0.458906	YES
Camp	1.95131	-4.11101	4.02908	0.00079131	0.0593121	-0.470262	YES
Ckmt2	6.5626	-3.06712	4.07148	0.000720145	0.0569598	-0.477956	YES
Wnt2	2.43605	-1.39737	4.04828	0.000758241	0.0580113	-0.483355	YES
Brd3	-0.336191	7.16633	-4.50377	0.000276598	0.0309412	-0.493254	YES
Slc7a2	0.856628	4.55325	4.40027	0.000347507	0.034035	-0.516592	YES
Olfr6	1.11076	-1.4157	4.05979	0.000739101	0.0571391	-0.52637	YES
Gm38392	1.1024	-0.921174	4.0492	0.0007567	0.0580113	-0.548046	YES
Saa1	3.1602	-4.62739	3.98152	0.00087959	0.0648928	-0.554455	YES
Piezo1	0.521474	5.58835	4.43092	0.000324774	0.0328467	-0.559812	YES
Sh3pxd2b	0.67239	7.64116	4.45456	0.000308275	0.0320562	-0.607692	YES
Trdn	6.76844	-1.73512	4.03572	0.000779711	0.0589613	-0.611938	YES
Cntnap4	2.65084	-4.89239	3.9511	0.000941187	0.0674734	-0.615722	YES
Ntng1	2.46742	3.45824	4.23648	0.000499297	0.0449994	-0.630676	YES
Stx11	0.475414	4.08329	4.26233	0.000471498	0.0439542	-0.651497	YES
Lrrc66	1.63886	-0.657788	4.02	0.000807453	0.0602164	-0.661144	YES
Lrrc2	1.87527	-1.22704	3.97398	0.000894475	0.0648928	-0.667971	YES
Mlip	4.38816	-2.78933	3.97331	0.000895804	0.0648928	-0.669277	YES
Axin2	1.2803	1.00879	4.0429	0.00076737	0.0584072	-0.74259	YES
Lrriq1	2.29125	-4.93104	3.87624	0.00111178	0.0760026	-0.752319	YES
Aspa	2.64421	1.89664	4.09679	0.000680751	0.055078	-0.786619	YES
Pls1	2.37853	1.75467	4.09737	0.000679883	0.055078	-0.792434	YES
Amigo2	1.15207	2.25676	4.07424	0.000715738	0.0569598	-0.810496	YES
Cacng6	4.26195	-4.05902	3.85396	0.0011683	0.079498	-0.820179	YES
Zfp800	0.699266	4.40036	4.23603	0.00049979	0.0449994	-0.834308	YES
Vmn1r224	1.21076	-1.85495	3.88574	0.00108852	0.0754607	-0.852797	YES
Rasa3	0.881159	3.98609	4.18559	0.000558945	0.0488366	-0.865466	YES
Znhit2	-0.748783	4.24788	-4.17769	0.000568824	0.0494074	-0.865731	YES
Trim63	4.97517	-3.34113	3.85039	0.00117762	0.0797646	-0.869942	YES
Mylk2	5.17539	-0.596462	3.97295	0.000896527	0.0648928	-0.873871	YES
Jsrp1	3.3485	-0.211082	3.93922	0.000966386	0.0689355	-0.885591	YES
Agr3	2.14894	-4.38658	3.80795	0.00129425	0.0864749	-0.887719	YES
Ube2e2	0.648122	3.55612	4.13504	0.000625307	0.0524618	-0.90791	YES
Agap2	1.64174	2.15955	4.06831	0.000725228	0.0569598	-0.930421	YES
Ctns	0.507979	5.37884	4.26822	0.00046538	0.0437694	-0.936765	YES
Mrgprb2	1.70342	-5.3546	3.75623	0.00145213	0.0924742	-0.938372	YES
Capn3	2.28754	0.077346	3.91566	0.00101839	0.0719503	-0.956681	YES
Sectm1a	2.08796	3.61619	4.12721	0.00063628	0.0530808	-0.958793	YES
Nwd2	-1.85433	-4.2943	-3.75548	0.00145455	0.0924742	-0.968799	YES
Slc4a8	1.62913	3.40287	4.08209	0.000703353	0.0564441	-0.980377	YES
Olfr633	1.60529	-5.04342	3.73231	0.00153149	0.0950167	-1.00438	YES
B3gat2	0.697586	2.26823	3.95103	0.00094132	0.0674734	-1.03728	YES
Sirt1	1.11851	3.0443	4.06499	0.000730608	0.0569598	-1.04534	YES
Smtnl1	5.49084	-3.01814	3.76475	0.00142485	0.0924742	-1.04955	YES
Mrps27	-0.455554	5.06687	-4.14907	0.00060613	0.0514374	-1.06594	YES
Nog	3.60144	-2.35226	3.75497	0.00145621	0.0924742	-1.12158	YES
Olfr948	1.34531	-5.13161	3.66497	0.00177895	0.103417	-1.1372	NO
Mrap	2.89801	-3.0273	3.71363	0.00159649	0.0976439	-1.1431	YES
Smn1	-0.513185	5.1981	-4.1047	0.000668896	0.0548717	-1.1604	YES
Nkx6-1	-2.16531	-3.967	-3.66845	0.00176526	0.103027	-1.16097	NO
Cyp2c55	2.52485	-3.87854	3.69544	0.0016624	0.0989801	-1.1652	YES
Tubal3	2.1842	-3.17692	3.71071	0.0016069	0.0976439	-1.17328	YES
Gngt1	1.15619	-1.22599	3.75878	0.00144392	0.0924742	-1.18556	YES
Slc35g3	1.93269	-4.42175	3.65509	0.00181847	0.104889	-1.21313	NO
Zbtb44	0.401004	6.23464	4.14137	0.000616588	0.0520259	-1.2145	YES
Nos1	1.45951	-0.157883	3.75405	0.0014592	0.0924742	-1.23364	YES
Ppp1r27	3.77008	-2.46252	3.69584	0.00166094	0.0989801	-1.23723	YES
Lin28a	1.5273	-4.81121	3.62574	0.00194104	0.110236	-1.25237	NO
Plpp7	2.38077	-0.697567	3.70111	0.00164156	0.0985334	-1.29326	YES
Luzp2	2.26001	-3.57602	3.61837	0.00197312	0.111203	-1.32362	NO
Hs3st3a1	1.80469	0.756763	3.77425	0.00139505	0.0915523	-1.32492	YES
Gm3029	3.22011	-4.92794	3.59395	0.00208314	0.115824	-1.33164	NO
Nrsn1	-1.42407	-5.17643	-3.55977	0.00224743	0.120716	-1.34372	NO
Gm29094	2.38186	-4.04696	3.5571	0.00226078	0.120716	-1.36271	NO
Gm5862	1.42773	-5.24331	3.53569	0.00237079	0.1237	-1.38276	NO
Arr3	1.83229	-4.53524	3.55635	0.00226455	0.120716	-1.38373	NO
Rel	0.718694	4.51322	3.99516	0.000853307	0.0633162	-1.38483	YES
Itgb1bp2	1.9234	0.505476	3.73698	0.00151566	0.0949283	-1.38888	YES
Klri1	1.93684	-5.11703	3.55862	0.00225316	0.120716	-1.39425	NO
Cyp2e1	1.88335	-0.624267	3.65546	0.00181697	0.104889	-1.40373	NO
Tpbgl	1.38854	0.733159	3.73003	0.0015393	0.0951014	-1.42244	YES
Myf6	4.94595	-3.71673	3.57259	0.00218435	0.11946	-1.44129	NO
Pkia	0.986497	3.62042	3.91251	0.00102557	0.0721125	-1.4483	YES
Gpsm3	-0.652301	5.07406	-3.9736	0.000895231	0.0648928	-1.46929	YES
Higd1c	1.48614	-5.2205	3.51574	0.0024781	0.127497	-1.47442	NO
Cmtm5	-1.10597	-5.32905	-3.46925	0.0027472	0.136061	-1.49887	NO
Msc	1.34777	1.77293	3.74528	0.00148793	0.0938922	-1.52469	YES
Olfr1284	1.25661	-3.02218	3.53948	0.00235095	0.1231	-1.52825	NO
Bend5	-0.942711	3.21506	-3.80851	0.00129264	0.0864749	-1.53083	YES
Tmprss4	2.29896	-1.11346	3.56936	0.00220008	0.119876	-1.57175	NO
Josd2	-0.682451	3.91581	-3.8312	0.001229	0.0828652	-1.57468	YES
Syk	1.00934	4.3061	3.91035	0.00103051	0.0721163	-1.58043	YES
Taco1	0.677093	2.84629	3.76147	0.00143528	0.0924742	-1.59369	YES
Kcnip2	-1.10473	0.142186	-3.54309	0.00233217	0.1231	-1.59599	NO
Saa2	2.45462	-4.79606	3.46137	0.00279558	0.137141	-1.6072	NO
Casp1	0.711046	4.52066	3.87984	0.0011029	0.0758802	-1.60754	YES
Mfsd13a	-1.51101	2.58551	-3.71208	0.001602	0.0976439	-1.61525	YES
Olfr1085	1.52943	-2.48505	3.50443	0.00254108	0.129385	-1.61851	NO
Snx10	0.725025	4.15019	3.87905	0.00110485	0.0758802	-1.61983	YES
Olfr54	1.8522	-4.63171	3.43186	0.00298442	0.141698	-1.66307	NO
Gpr22	2.28361	-4.58213	3.44217	0.00291701	0.140301	-1.66991	NO
Col22a1	1.50608	-1.48013	3.50974	0.00251129	0.128756	-1.68772	NO
Nxpe4	1.37222	-0.698935	3.53055	0.00239798	0.124678	-1.68828	NO
Gprin2	1.55268	0.222714	3.58679	0.00211652	0.117051	-1.68995	NO
Kctd4	1.96566	-3.63095	3.4439	0.00290589	0.140223	-1.69721	NO
Vnn1	3.05077	-2.1	3.48118	0.00267547	0.134205	-1.70294	NO
Cacng2	1.82181	-3.0698	3.44031	0.00292908	0.140425	-1.73166	NO
Kcnc4	2.15637	-1.8392	3.42942	0.00300059	0.141763	-1.73394	NO
Gm49353	1.17165	-5.12842	3.35273	0.00355513	0.154397	-1.75115	NO
Scd1	0.657655	7.21896	3.92413	0.000999384	0.0709466	-1.76979	YES
Eml6	1.18511	-1.36864	3.45883	0.00281136	0.137459	-1.77218	NO
Cbl	0.552938	6.78639	3.89889	0.00105711	0.073629	-1.7849	YES
R3hdml	2.87283	-0.341698	3.5051	0.00253731	0.129385	-1.81899	NO
Gm4847	1.6492	-4.27435	3.36723	0.00344303	0.15406	-1.83456	NO
Sec14l4	1.98361	-1.60219	3.40877	0.0031409	0.146304	-1.83521	NO
Tmem182	3.76413	-1.11357	3.46784	0.00275576	0.136061	-1.86159	NO
Gsdmd	0.834657	3.45975	3.70146	0.00164029	0.0985334	-1.86321	YES
Coro2a	-0.769059	5.49627	-3.79919	0.00131975	0.0877811	-1.87834	YES
Ppp1r3d	1.0555	0.482376	3.49592	0.00258945	0.130555	-1.88094	NO
Tcaf2	0.873899	4.62364	3.78163	0.00137232	0.0904626	-1.9005	YES
Krt78	1.14295	-2.39066	3.37002	0.00342188	0.154047	-1.91144	NO
Vopp1	0.633167	4.73092	3.78429	0.00136422	0.0903319	-1.91219	YES
Dok2	1.30018	1.60656	3.54012	0.00234763	0.1231	-1.91226	NO
Dpysl4	1.67987	-5.18524	3.28592	0.00411974	0.169217	-1.91248	NO
Lyve1	1.74557	-0.0737084	3.39038	0.00327127	0.149547	-1.92097	NO
Slc2a12	1.88076	-2.0735	3.36182	0.00348448	0.154397	-1.92997	NO
Cabp7	1.34139	-3.34486	3.32033	0.00381874	0.162133	-1.93663	NO
Fam189a1	-1.12558	-5.16601	-3.23241	0.00463479	0.181531	-1.95961	NO
Dnajb3	1.54828	-0.929486	3.40288	0.00318208	0.147045	-1.96016	NO
Klhl18	0.654522	3.98171	3.69176	0.00167608	0.0993935	-1.96084	YES
Srl	1.08698	4.15471	3.70406	0.00163085	0.0985334	-1.98311	YES
Pde4dip	1.04027	5.18513	3.75519	0.00145549	0.0924742	-1.99111	YES
Alkbh6	-0.566242	3.61774	-3.61924	0.00196932	0.111203	-1.99617	NO
Vps13c	0.940171	3.42508	3.64571	0.00185677	0.106268	-1.99872	NO
Mast1	2.59926	-4.47549	3.26046	0.00435743	0.172962	-2.00723	NO
Gm6465	2.34605	-4.99093	3.24038	0.00455426	0.179329	-2.01422	NO
Csn1s2b	1.94445	-3.80551	3.27602	0.0042106	0.169411	-2.023	NO
Stac3	1.59835	0.953314	3.42866	0.00300561	0.141763	-2.02623	NO
Mettl24	1.9351	-1.90731	3.32157	0.00380833	0.162133	-2.03868	NO
S100g	3.91591	-0.810096	3.36019	0.00349701	0.154397	-2.04144	NO
Slc38a4	3.022	-3.04924	3.29024	0.00408075	0.168845	-2.06226	NO
Yipf7	1.96995	-2.54785	3.29736	0.00401714	0.167563	-2.08734	NO
Ern1	0.440063	5.31858	3.73653	0.00151721	0.0949283	-2.11178	YES
Fam102b	0.318886	5.97739	3.73444	0.00152425	0.0949666	-2.11889	YES
Gm8773	2.81542	-1.59889	3.30665	0.00393574	0.166043	-2.13151	NO
Sash1	0.377795	5.84379	3.72804	0.00154612	0.095125	-2.14494	YES
Tmprss11e	2.90949	1.11022	3.43677	0.00295213	0.141072	-2.14654	NO
Slurp1	1.63191	0.637273	3.37128	0.00341239	0.154047	-2.1555	NO
Cntd1	2.32075	0.0276675	3.34769	0.0035949	0.155596	-2.16462	NO
Kcnk13	0.907533	0.102275	3.34307	0.00363182	0.156348	-2.182	NO
Mon2	0.4681	5.17355	3.68237	0.00171145	0.100682	-2.18867	NO
Rtn2	2.19684	1.70517	3.44465	0.00290102	0.140223	-2.19092	NO
Slc13a5	1.82559	-2.19915	3.26189	0.00434368	0.172881	-2.19855	NO
Tmprss11d	0.886176	-0.107887	3.27801	0.00419224	0.169217	-2.20265	NO
Oxt	-1.73593	-3.70251	-3.15789	0.00545851	0.200498	-2.22546	NO
Ube4a	0.464182	6.37413	3.68742	0.00169232	0.099955	-2.24359	YES
Nr3c2	1.92791	0.609599	3.35284	0.00355423	0.154397	-2.24759	NO
Npy	2.16276	1.35575	3.40685	0.00315427	0.146465	-2.26574	NO
Chst8	2.07254	-3.73299	3.12807	0.00582695	0.210884	-2.27652	NO
Olfr1469	1.54088	-5.10974	3.10484	0.00613067	0.217087	-2.29168	NO
Cav3	4.21279	-3.09713	3.15098	0.00554189	0.202553	-2.30696	NO
Scn4b	4.67984	-0.687285	3.28294	0.00414692	0.169217	-2.31279	NO
Krt90	3.266	-0.609398	3.26805	0.00428522	0.171945	-2.31409	NO
Nxpe5	1.77625	1.54965	3.38185	0.00333355	0.151924	-2.31584	NO
Klhdc7b	1.71134	-3.71691	3.09268	0.00629562	0.219766	-2.32821	NO
Zfp846	0.619131	3.56815	3.47389	0.00271904	0.13564	-2.32848	NO
Myo1d	0.446318	6.83965	3.66957	0.00176085	0.103027	-2.33574	NO
Kif26a	2.26536	4.46263	3.56626	0.00221524	0.120258	-2.33938	NO
Twf1	0.344101	6.86431	3.64795	0.00184755	0.106151	-2.33951	NO
Sfrp4	2.73074	0.111378	3.23817	0.0045764	0.179721	-2.34712	NO
Cers3	1.38469	2.10763	3.36213	0.00348203	0.154397	-2.35129	NO
Col26a1	2.23839	-3.62587	3.10273	0.00615899	0.217568	-2.35175	NO
Nup205	0.570346	5.52751	3.61017	0.0020094	0.112817	-2.35372	NO
Ddr2	1.85495	4.06926	3.54269	0.00233427	0.1231	-2.36228	NO
Pde1c	1.66431	3.71175	3.48022	0.00268119	0.134205	-2.37796	NO
Fam187b	-0.791373	1.34082	-3.26373	0.00432609	0.172881	-2.38585	NO
Il21	-1.82941	-4.47236	-3.05404	0.0068494	0.230048	-2.39156	NO
Foxn3	0.440209	6.09028	3.59451	0.00208055	0.115824	-2.39213	NO
Atp6v1fnb	2.04211	-5.12919	3.05263	0.00687059	0.230048	-2.39666	NO
Olfr221	2.00589	-4.18743	3.09581	0.00625279	0.219766	-2.39718	NO
Plac1	1.94185	-2.85023	3.12422	0.00587616	0.211628	-2.41984	NO
Serping1	1.28984	6.44775	3.62779	0.00193224	0.11016	-2.42298	NO
Rnf152	1.36998	2.5	3.35791	0.00351469	0.154397	-2.43685	NO
Gm14418	1.81902	-2.04922	3.1484	0.00557322	0.203195	-2.44058	NO
Mfsd1	0.740552	5.77061	3.57426	0.00217624	0.119459	-2.44538	NO
Snrpa	-0.375366	6.79231	-3.59322	0.0020865	0.115824	-2.45277	NO
Vav3	0.456688	4.00033	3.46644	0.00276435	0.136061	-2.4578	NO
Kiz	-0.454882	5.14549	-3.52436	0.00243117	0.12596	-2.47642	NO
Rnf125	1.71882	1.38709	3.28468	0.00413101	0.169217	-2.47644	NO
Nrxn3	1.35393	-3.48751	3.03449	0.00714743	0.235109	-2.48085	NO
Bdkrb1	1.76558	0.346104	3.20161	0.00495936	0.189205	-2.48133	NO
Olfr943	0.825568	-0.949941	3.11517	0.00599367	0.213902	-2.48625	NO
Slc23a4	1.50691	0.613314	3.22483	0.00471265	0.183607	-2.49116	NO
Gm6583	1.22221	-3.64288	3.06396	0.00670291	0.227007	-2.4918	NO
Tas2r135	1.79312	-5.03945	3.00183	0.00767351	0.242535	-2.49358	NO
Ndufs6	-0.507917	5.69824	-3.54702	0.00231194	0.122799	-2.499	NO
Nsun3	1.85392	0.0318044	3.21452	0.00482067	0.185854	-2.49942	NO
Kcnc1	1.83182	-1.69038	3.08486	0.00640404	0.221633	-2.50325	NO
Dcn	1.85853	4.58081	3.46903	0.0027485	0.136061	-2.50581	NO
Armh4	1.40868	0.273136	3.2046	0.00492691	0.188474	-2.51211	NO
Csrp3	4.16647	-2.78815	3.09366	0.0062822	0.219766	-2.5155	NO
Cd200r1	2.00102	-1.19148	3.13225	0.00577393	0.209479	-2.51738	NO
Zdhhc17	0.660502	3.72723	3.37412	0.00339101	0.153594	-2.52253	NO
Zbtb20	1.07629	6.38308	3.5783	0.00215681	0.118834	-2.52965	NO
Rgs18	1.63217	-1.96886	3.04786	0.00694237	0.231925	-2.536	NO
Krt84	2.82361	-3.81608	3.02509	0.00729515	0.236031	-2.54483	NO
Panx3	2.42543	-1.24351	3.12504	0.00586563	0.211628	-2.55141	NO
Fgf6	2.24345	-4.13029	3.01729	0.00742002	0.237151	-2.5529	NO
Vmn2r4	0.768192	0.596089	3.18401	0.00515472	0.191819	-2.55652	NO
Taf6l	-0.471259	4.53509	-3.43356	0.00297317	0.141619	-2.56555	NO
Guca1b	0.950457	-2.99757	3.01783	0.00741127	0.237151	-2.56979	NO
Zw10	0.500574	5.35003	3.5218	0.00244499	0.126233	-2.57114	NO
Plcl2	0.836336	2.85508	3.34657	0.0036038	0.155596	-2.57125	NO
Olfr1211	-2.24618	-2.98391	-2.96711	0.00827416	0.250754	-2.57856	NO
Plscr1	0.570197	4.56767	3.4447	0.00290071	0.140223	-2.57894	NO
Spag16	1.87868	-4.22694	2.96622	0.00829003	0.250754	-2.57942	NO
Atp2b1	0.713477	8.01862	3.56263	0.00223316	0.120716	-2.59553	NO
Scg3	1.98514	-4.47885	2.93547	0.0088609	0.257878	-2.599	NO
Hoxa9	3.48692	-2.57783	2.99489	0.0077901	0.244222	-2.61131	NO
Olfr695	0.945639	-1.23241	3.06584	0.00667547	0.226824	-2.61654	NO
Tspyl3	0.682925	2.4007	3.22588	0.00470178	0.183607	-2.62074	NO
Synrg	0.356457	5.61662	3.50212	0.00255411	0.129602	-2.6223	NO
Chrna1	1.82796	-0.828513	3.0768	0.00651778	0.223818	-2.62336	NO
Bdh2	2.59233	-4.34842	2.95222	0.00854538	0.255427	-2.62436	NO
Btnl2	1.52676	-1.31957	3.02346	0.00732102	0.236031	-2.62641	NO
Clstn2	1.59923	-1.2607	3.06899	0.00662983	0.226611	-2.63741	NO
Cd300ld	0.774939	1.48229	3.20048	0.00497165	0.189205	-2.64009	NO
Slc35f2	1.22599	-0.453324	3.07469	0.00654791	0.224331	-2.64658	NO
Kcne1l	1.60601	-2.84882	3.00102	0.00768702	0.242535	-2.64912	NO
Ces1f	3.01516	-4.16066	2.94715	0.00863972	0.255826	-2.65022	NO
Crybg3	0.851926	4.50005	3.39311	0.00325159	0.149109	-2.66242	NO
Cdh10	1.21695	-4.90031	2.86967	0.0102128	0.271227	-2.66587	NO
Lrrc32	1.22434	3.00781	3.27804	0.00419195	0.169217	-2.66593	NO
Tmem200c	2.56196	-4.81049	2.93182	0.00893112	0.258003	-2.66603	NO
Actn2	5.51381	-1.20589	3.06538	0.00668213	0.226824	-2.6697	NO
Klhl38	1.54308	-1.69527	3.03184	0.00718872	0.235363	-2.67416	NO
Nudt7	0.641826	2.82396	3.28553	0.00412327	0.169217	-2.68308	NO
Krt14	0.669268	9.04796	3.49572	0.00259059	0.130555	-2.68433	NO
Ccl6	1.61338	3.85743	3.35586	0.00353063	0.154397	-2.69914	NO
Acsl6	1.8531	-2.25601	3.00357	0.00764464	0.242233	-2.70697	NO
Rgs7bp	1.34611	-1.71422	2.97376	0.00815567	0.249988	-2.70776	NO
Gm48551	-2.33544	-3.12463	-2.90636	0.00943609	0.264892	-2.71372	NO
Ifne	-1.90007	-3.9766	-2.88865	0.00980358	0.267084	-2.71663	NO
Msx2	3.06552	-1.71353	3.04033	0.0070571	0.233121	-2.71733	NO
Kif13b	0.625082	5.47107	3.45726	0.00282115	0.137482	-2.72342	NO
Agbl4	0.823685	-1.47888	2.95573	0.00848065	0.254523	-2.73207	NO
Vegfd	1.14563	0.447503	3.02532	0.00729158	0.236031	-2.74217	NO
Tlr2	0.350557	5.47928	3.42373	0.00303858	0.142437	-2.74269	NO
Prop1	1.59565	-4.41184	2.9017	0.00953147	0.266556	-2.74756	NO
Ccl24	1.2247	-0.839871	3.02464	0.00730232	0.236031	-2.75833	NO
Zfp683	1.98422	-4.06911	2.88925	0.00979102	0.267084	-2.76767	NO
Pcdhb16	1.26597	-0.306788	2.99189	0.00784103	0.244779	-2.76813	NO
Ptprn2	3.24532	-4.15893	2.88968	0.00978197	0.267084	-2.79319	NO
Sult1d1	2.04452	-3.87773	2.87859	0.0100185	0.269458	-2.80721	NO
Sh3glb2	-0.337876	6.03171	-3.42129	0.00305507	0.142757	-2.81011	NO
Trim15	-1.47099	-2.02484	-2.90727	0.00941763	0.264877	-2.81081	NO
Olfr954	1.07622	-2.1255	2.93308	0.0089068	0.257878	-2.81545	NO
Olfr1216	1.64792	-5.28947	2.82539	0.0112325	0.280168	-2.81971	NO
Dsg3	1.18625	7.78061	3.42731	0.00301461	0.141763	-2.82018	NO
Mtmr6	0.784683	5.21589	3.40223	0.00318667	0.147045	-2.82578	NO
Olfr920	0.681783	1.08541	3.09409	0.00627625	0.219766	-2.82836	NO
Ssxb5	2.32388	-5.08379	2.83771	0.0109392	0.278171	-2.83093	NO
Trim72	2.71268	0.143506	3.02515	0.00729423	0.236031	-2.83145	NO
Timm8a2	1.17308	-2.85554	2.90507	0.00946251	0.26513	-2.83172	NO
Cyp3a57	3.23022	-3.7715	2.86848	0.0102391	0.271436	-2.83378	NO
Cyp4f39	2.857	-3.19642	2.88133	0.00995958	0.269458	-2.83474	NO
Llcfc1	1.95928	-2.11141	2.92354	0.00909242	0.260696	-2.83596	NO
Gas2l3	0.392154	5.60009	3.3966	0.00322658	0.148422	-2.84138	NO
Twist2	0.815304	0.457286	3.01815	0.0074061	0.237151	-2.84223	NO
Zfp697	0.865389	1.55366	3.08603	0.00638776	0.221633	-2.84267	NO
Slitrk2	-1.5136	3.96718	-3.21807	0.00478323	0.185379	-2.84486	NO
Raet1d	1.82647	-0.406587	3.0064	0.00759782	0.241787	-2.8526	NO
Galnt6	1.06224	1.87191	3.12167	0.0059091	0.212296	-2.85713	NO
Cds1	1.34272	3.26302	3.24307	0.00452741	0.178748	-2.86187	NO
Nynrin	0.984663	2.92668	3.18776	0.0051124	0.191767	-2.86653	NO
Tent5a	0.559983	4.31189	3.27778	0.00419433	0.169217	-2.87234	NO
Smg6	0.50251	4.46198	3.3332	0.00371177	0.158864	-2.87826	NO
Tceal7	3.17215	-3.59115	2.8452	0.0107646	0.276435	-2.881	NO
Hcrtr1	2.15991	-4.54884	2.83703	0.0109553	0.278171	-2.88101	NO
Zzef1	0.497799	4.22687	3.29008	0.00408219	0.168845	-2.88663	NO
Gm14548	1.26041	-1.17366	2.94074	0.00876043	0.256717	-2.89136	NO
Agmat	1.11552	-3.67149	2.83969	0.0108928	0.278171	-2.89193	NO
Minar2	1.60773	-4.94572	2.83458	0.0110132	0.278171	-2.89445	NO
Xdh	0.899215	4.99587	3.35812	0.00351306	0.154397	-2.89972	NO
Upk2	1.63286	-3.1369	2.88014	0.00998505	0.269458	-2.91112	NO
Pde6a	-1.17295	0.21247	-2.96753	0.00826664	0.250754	-2.92524	NO
Trpv5	1.67842	-2.47305	2.85324	0.0105803	0.276435	-2.92988	NO
Sgcb	0.602731	5.69691	3.3747	0.0033867	0.153594	-2.93195	NO
Arpc5l	-0.314235	6.14342	-3.35759	0.00351714	0.154397	-2.93948	NO
Art3	1.59687	1.67163	3.08582	0.00639066	0.221633	-2.93972	NO
Gm8897	2.51283	-4.66466	2.78974	0.0121239	0.28663	-2.94424	NO
Ccdc153	1.65245	-3.29413	2.82876	0.0111515	0.279563	-2.94532	NO
Synpo2l	2.28131	-0.108212	2.96673	0.00828089	0.250754	-2.9567	NO
Spata32	-2.53156	-3.40445	-2.77357	0.0125504	0.290013	-2.95951	NO
Tbx1	-2.52558	-2.02418	-2.8138	0.011515	0.282913	-2.96724	NO
Ncam1	1.48156	4.85947	3.32005	0.0038211	0.162133	-2.96725	NO
Olfr750	1.22326	-2.38376	2.85695	0.0104961	0.276324	-2.97026	NO
Gjb6	3.21983	-3.64385	2.84678	0.0107282	0.276435	-2.97732	NO
Tmem263	0.495035	5.39413	3.33983	0.00365788	0.157012	-2.97759	NO
Alpk3	2.31233	-0.426848	2.89665	0.00963601	0.266952	-2.98248	NO
Cnot1	0.437484	7.41764	3.36825	0.00343533	0.15406	-2.98628	NO
Olfr576	0.901096	-1.28073	2.87993	0.00998957	0.269458	-2.98864	NO
Dimt1	-0.505322	3.91892	-3.19343	0.00504917	0.190681	-2.98919	NO
Zscan5b	1.21013	-5.08821	2.76553	0.0127675	0.292286	-2.98965	NO
Mcidas	1.09778	-3.63886	2.80511	0.0117314	0.28373	-2.99215	NO
Olfr281	0.853682	-2.04655	2.80476	0.0117402	0.28373	-3.00031	NO
C1rb	1.21184	-0.143726	2.88903	0.00979562	0.267084	-3.00061	NO
Dph2	-1.01316	2.22327	-3.04097	0.00704725	0.233121	-3.00153	NO
Rbm7	0.537198	5.2526	3.30291	0.00396835	0.166555	-3.0092	NO
Gm5127	1.00244	-1.98344	2.8511	0.0106291	0.276435	-3.01077	NO
Sgsm2	0.698046	5.23111	3.31289	0.00388196	0.164244	-3.01408	NO
Bves	3.11322	-2.97413	2.81411	0.0115073	0.282913	-3.03107	NO
Ctnnb1	0.638623	9.42525	3.35387	0.00354618	0.154397	-3.04326	NO
Olfr145	0.990998	-2.71434	2.79141	0.0120807	0.28663	-3.04404	NO
Cenpp	-0.465709	3.58355	-3.13305	0.00576378	0.209479	-3.04514	NO
Fndc9	-1.44075	-3.26297	-2.70456	0.0145369	0.306117	-3.04698	NO
Ms4a8a	2.06422	-5.08701	2.71842	0.0141153	0.301721	-3.06945	NO
Tmem38b	0.573008	3.67904	3.16645	0.00535705	0.197262	-3.07256	NO
Olfr675	0.876432	-1.32121	2.83369	0.0110341	0.278171	-3.07344	NO
Clcn1	3.02554	-4.11728	2.77554	0.0124974	0.289273	-3.08148	NO
Rpl39l	0.897889	-1.77323	2.77038	0.0126361	0.29063	-3.0961	NO
Kctd19	1.70776	-5.07377	2.69642	0.0147902	0.307161	-3.10539	NO
Gm5108	1.11521	-3.45322	2.70509	0.0145205	0.306117	-3.11176	NO
Tceal5	2.54529	-3.76887	2.71171	0.014318	0.305055	-3.11226	NO
Pappa2	0.82607	-1.49694	2.77918	0.0124008	0.288525	-3.11846	NO
Otud4	0.369208	7.31583	3.29123	0.00407183	0.168845	-3.13292	NO
Nbeal2	0.758304	5.28225	3.26228	0.00433999	0.172881	-3.1366	NO
Catsperz	-2.21241	-3.47347	-2.67163	0.0155878	0.314574	-3.13671	NO
Serf2	-0.278582	7.65947	-3.29871	0.00400524	0.167539	-3.13814	NO
Set	-0.349511	8.45742	-3.30267	0.00397043	0.166555	-3.13823	NO
Tpm1	0.508123	9.17878	3.28026	0.00417151	0.169217	-3.14212	NO
Fam205a3	2.52205	-4.71558	2.68353	0.0151999	0.311511	-3.14326	NO
Asgr2	-1.62574	-2.34044	-2.73252	0.013698	0.299698	-3.14566	NO
Mageb3	-1.99706	-3.5497	-2.68256	0.0152314	0.311511	-3.14627	NO
Saa4	1.07206	-3.08192	2.7421	0.0134217	0.298655	-3.15788	NO
Trim54	5.22363	-3.29019	2.75874	0.0129539	0.293483	-3.15802	NO
Szrd1	-0.59097	5.73385	-3.24474	0.00451074	0.178567	-3.16069	NO
Nol3	1.30544	1.37231	2.9226	0.00911092	0.260721	-3.16243	NO
Dclk1	0.845007	4.83197	3.22208	0.00474123	0.184234	-3.16261	NO
Ckb	0.765111	3.16135	3.0845	0.00640912	0.221633	-3.1631	NO
Zfp454	1.21493	-0.10701	2.8362	0.0109749	0.278171	-3.16813	NO
Olfr1260	1.32834	-1.52813	2.78688	0.0121981	0.286988	-3.17695	NO
Ube2v1	-0.53318	7.38595	-3.27872	0.00418562	0.169217	-3.17741	NO
Med29	-0.492105	5.09962	-3.19193	0.0050659	0.190824	-3.18363	NO
Six2	-1.00724	-1.15942	-2.74265	0.013406	0.298655	-3.18867	NO
Sgcd	1.68394	-2.69832	2.68949	0.0150091	0.310538	-3.18898	NO
Saal1	-0.478258	3.41785	-3.05267	0.00686993	0.230048	-3.19211	NO
Agbl1	1.86719	-3.67599	2.69966	0.014689	0.306117	-3.19211	NO
Cel	1.58459	-3.19779	2.70713	0.0144577	0.306117	-3.20839	NO
Gulo	1.92224	-3.45908	2.70321	0.0145788	0.306117	-3.21053	NO
Ttyh2	0.545282	4.43729	3.1545	0.00549925	0.201494	-3.21479	NO
Zfpm1	-0.648416	5.47897	-3.19903	0.00498751	0.18932	-3.21646	NO
Popdc3	3.05296	-3.84019	2.67721	0.0154049	0.313736	-3.22311	NO
Fam71f1	-1.36864	-3.85688	-2.61293	0.0176429	0.332701	-3.22447	NO
Tnni2	3.15726	4.89919	3.18621	0.00512988	0.191767	-3.2316	NO
Rab38	1.11417	1.05085	2.87896	0.0100105	0.269458	-3.23195	NO
Fam78a	0.912582	0.929392	2.8846	0.00988963	0.268438	-3.23222	NO
Saa3	1.76558	1.90965	2.96544	0.00830414	0.250754	-3.23279	NO
Gmnc	2.44822	-4.71444	2.65671	0.0160873	0.319357	-3.23476	NO
Gm5475	-1.21188	-4.51979	-2.60645	0.0178848	0.333858	-3.23504	NO
Gna15	0.764819	1.78689	2.93756	0.00882086	0.257409	-3.23715	NO
Smco1	1.05521	0.120365	2.84848	0.010689	0.276435	-3.24185	NO
Ttc23l	1.78029	-3.99639	2.65933	0.0159985	0.319153	-3.24234	NO
Cpa4	1.40498	-1.61114	2.70508	0.0145208	0.306117	-3.24381	NO
L1td1	1.20003	-1.03214	2.74433	0.013358	0.298655	-3.25167	NO
Art5	1.84861	-0.818308	2.77891	0.0124078	0.288525	-3.25201	NO
Epha3	1.07786	2.01621	2.94675	0.00864713	0.255826	-3.25352	NO
Sh3bgrl2	0.651085	6.59688	3.21537	0.00481166	0.185854	-3.25657	NO
Tbc1d8b	0.448188	5.15961	3.18711	0.00511972	0.191767	-3.26557	NO
H2al1m	-2.18707	-2.14021	-2.64424	0.0165165	0.321876	-3.26746	NO
Sema3d	2.13247	0.561412	2.87134	0.0101762	0.270741	-3.26804	NO
Ostn	1.29499	-3.71954	2.6365	0.0167885	0.324146	-3.27214	NO
Lipt2	-1.26376	1.53364	-2.87271	0.0101462	0.270432	-3.27459	NO
Trpm3	-0.62312	1.73392	-2.8746	0.0101049	0.270432	-3.27936	NO
Nae1	0.347978	5.39033	3.18378	0.00515726	0.191819	-3.28381	NO
Gm3002	1.91667	-1.11352	2.7305	0.0137572	0.299698	-3.2853	NO
Pcca	0.489143	3.258	3.02398	0.00731273	0.236031	-3.2858	NO
Cpeb1	1.26127	1.14871	2.83428	0.0110201	0.278171	-3.29481	NO
Aff1	0.254501	6.97786	3.21099	0.00485826	0.186815	-3.29679	NO
Zfp202	2.57348	-1.11801	2.72456	0.0139323	0.301107	-3.3012	NO
Aldh1l1	1.56441	0.259023	2.78331	0.0122916	0.287635	-3.30136	NO
Xirp1	2.8444	-0.341015	2.79378	0.0120195	0.286258	-3.30363	NO
Gm43518	1.52507	-3.52699	2.65818	0.0160376	0.319153	-3.3088	NO
Nudt19	-0.601168	1.90806	-2.85399	0.0105633	0.276435	-3.31483	NO
Bpifa2	5.4394	-1.00592	2.75239	0.0131305	0.296008	-3.31774	NO
Nt5c1a	1.55872	-5.2991	2.56347	0.019572	0.349723	-3.31787	NO
Hoxc11	-1.61433	-5.05582	-2.56403	0.0195491	0.349723	-3.31884	NO
Fam124a	1.28294	-0.539541	2.74641	0.0132989	0.298438	-3.31978	NO
Kif26b	0.978616	4.38958	3.10823	0.00608539	0.216002	-3.32234	NO
Gm10521	-1.07745	-1.35263	-2.68018	0.0153083	0.312645	-3.32378	NO
Serpinb1a	1.67864	1.34358	2.8611	0.010403	0.274797	-3.32394	NO
Cdk6	0.975605	6.08252	3.17937	0.0052074	0.192713	-3.32786	NO
Amd2	0.521405	2.93428	2.94663	0.00864939	0.255826	-3.32914	NO
Tsen34	-0.445343	6.91643	-3.20964	0.0048726	0.18688	-3.3319	NO
Olfr417	-1.32998	-2.47455	-2.62041	0.0173672	0.330364	-3.33194	NO
Plaur	-0.696637	4.34612	-3.06666	0.00666355	0.226824	-3.33461	NO
Wnt9b	1.90223	-4.93495	2.57942	0.018929	0.344345	-3.33746	NO
Rbp2	1.47444	0.76842	2.81497	0.0114862	0.282913	-3.33885	NO
Steap1	1.6097	-1.70485	2.69971	0.0146872	0.306117	-3.33953	NO
Crk	0.3174	7.1741	3.19683	0.00501168	0.18975	-3.3526	NO
Eya4	1.76962	3.89799	3.04612	0.00696872	0.23228	-3.35578	NO
Olfr640	1.42139	-2.22875	2.66433	0.0158304	0.318029	-3.35742	NO
Olfr1257	-1.07325	-4.17771	-2.52095	0.0213881	0.35559	-3.35953	NO
Engase	0.835901	1.33598	2.82578	0.0112231	0.280168	-3.36295	NO
Chtf8	0.433044	7.14234	3.18187	0.00517901	0.192144	-3.36635	NO
Garnl3	-0.744776	2.65393	-2.90893	0.00938392	0.264433	-3.36638	NO
Mkln1	0.447073	6.45818	3.17029	0.00531214	0.196098	-3.3707	NO
Tbc1d30	0.869618	3.54371	3.03438	0.00714911	0.235109	-3.37387	NO
Myf5	1.12675	-5.34876	2.52716	0.0211134	0.354618	-3.3771	NO
Olfr1324	1.15625	-2.9807	2.62559	0.0171788	0.328578	-3.38305	NO
Tmem221	-0.837746	1.07061	-2.78605	0.0122199	0.286988	-3.38881	NO
Folr2	1.56706	1.14366	2.83005	0.0111208	0.279268	-3.39244	NO
Sec24d	0.58008	5.08638	3.09634	0.00624556	0.219766	-3.39397	NO
Zkscan6	0.32291	4.37074	3.02675	0.00726889	0.236031	-3.40382	NO
Eno3	2.87612	4.01171	3.04182	0.00703424	0.233121	-3.40529	NO
Ttll7	0.996098	5.04658	3.1149	0.00599725	0.213902	-3.41667	NO
Sdhaf3	0.521266	2.54482	2.88765	0.00982486	0.267171	-3.42035	NO
Tepp	1.25808	-1.98952	2.63636	0.0167934	0.324146	-3.4216	NO
Fabp3	2.1515	0.310646	2.73795	0.0135409	0.299103	-3.42361	NO
Duox2	1.03953	-1.16297	2.66683	0.0157467	0.31678	-3.42988	NO
Lsmem1	1.29328	-1.49013	2.62193	0.017312	0.33027	-3.43773	NO
Gm572	2.40547	-4.95205	2.53064	0.0209608	0.354618	-3.44213	NO
Pnoc	1.27595	-2.83634	2.57807	0.0189826	0.344345	-3.44575	NO
Abcc12	-2.39385	-2.37469	-2.5644	0.0195338	0.349723	-3.45018	NO
Tomm34	-0.339388	5.9878	-3.11804	0.00595618	0.213469	-3.45315	NO
Klk11	2.47879	3.36801	2.91362	0.00928943	0.262271	-3.45693	NO
Olfr829	1.33138	-1.53312	2.64399	0.0165253	0.321876	-3.46289	NO
Tmem144	1.05018	2.5046	2.87765	0.0100389	0.269518	-3.47302	NO
Gm6902	1.6772	-4.96257	2.489	0.0228566	0.359132	-3.48028	NO
Fads2	-0.651683	6.1655	-3.11269	0.00602634	0.214421	-3.48447	NO
Chrne	2.11062	-3.82	2.55345	0.0199864	0.351273	-3.48554	NO
Cbr2	1.15811	3.63837	2.97644	0.00810844	0.249436	-3.49133	NO
Eya1	2.29859	0.276827	2.72423	0.0139418	0.301107	-3.49242	NO
Tep1	0.36923	3.97795	2.98937	0.00788405	0.245603	-3.49503	NO
Hcn4	2.40742	-0.985968	2.66816	0.0157025	0.316322	-3.49559	NO
Slc39a8	1.01882	2.63871	2.87356	0.0101276	0.270432	-3.49653	NO
Bmp4	1.18068	1.22742	2.77106	0.0126176	0.29063	-3.49688	NO
Edar	1.42557	-0.0471692	2.6989	0.0147127	0.306117	-3.49697	NO
Ccdc146	1.35553	-2.19016	2.58208	0.0188237	0.343999	-3.49934	NO
Vmn1r167	1.52399	-4.85581	2.50486	0.0221161	0.356698	-3.5013	NO
Retnla	4.82219	-0.60528	2.68254	0.0152317	0.311511	-3.51182	NO
Olfr1160	0.826382	-1.0248	2.63254	0.0169293	0.326143	-3.5155	NO
Nrcam	2.02982	-4.36013	2.48614	0.0229928	0.360034	-3.52156	NO
Cd19	1.69528	-4.40965	2.47667	0.0234482	0.362268	-3.52421	NO
Krt88	-1.36946	-0.473615	-2.60576	0.0179107	0.333858	-3.5254	NO
Krt222	-0.954312	-1.48332	-2.53723	0.0206749	0.354618	-3.53244	NO
Cul7	1.01992	2.30272	2.85674	0.010501	0.276324	-3.54263	NO
Mpo	0.911767	-1.14814	2.60719	0.0178573	0.333858	-3.54332	NO
Mansc4	-1.56519	-0.435483	-2.61369	0.0176147	0.332608	-3.54911	NO
Olfr1031	2.09569	-3.9349	2.50981	0.0218896	0.356698	-3.54952	NO
Elobl	1.34566	-0.235481	2.65634	0.0160999	0.319357	-3.54968	NO
Swi5	-0.265513	7.12339	-3.07873	0.00649039	0.223396	-3.55051	NO
Tnxb	2.43531	1.76582	2.77549	0.0124987	0.289273	-3.55171	NO
Prrt2	-1.11212	1.50821	-2.72259	0.0139907	0.30111	-3.55524	NO
Vwa5a	0.472483	6.03066	3.08087	0.00646017	0.222876	-3.55732	NO
Olfr102	-0.996703	-1.58707	-2.54785	0.0202216	0.351273	-3.55947	NO
Slc5a1	-1.26546	1.3894	-2.70545	0.0145094	0.306117	-3.56473	NO
Tas2r108	1.7746	-4.13893	2.4892	0.0228471	0.359132	-3.56879	NO
Kcp	1.95971	-1.65616	2.59671	0.0182549	0.338207	-3.56926	NO
Zic3	-1.42137	-4.61564	-2.43099	0.0257682	0.377099	-3.57344	NO
Unc93a2	2.26019	-3.40386	2.50669	0.0220321	0.356698	-3.57385	NO
Ltc4s	1.27288	0.515822	2.66123	0.0159343	0.318891	-3.57403	NO
Gm20431	-4.31318	-1.77716	-2.50461	0.0221275	0.356698	-3.57763	NO
AI467606	1.28214	3.6794	2.9146	0.00926974	0.262271	-3.57866	NO
Olfr390	1.13608	-3.59663	2.48398	0.0230959	0.361265	-3.5825	NO
Asb10	1.5486	-1.24958	2.61511	0.0175622	0.33204	-3.58382	NO
Jph1	0.676675	2.80413	2.81968	0.0113708	0.281714	-3.59177	NO
Kcna4	2.70887	-2.51712	2.53442	0.0207964	0.354618	-3.59223	NO
Ch25h	0.846217	1.90981	2.75815	0.0129701	0.293483	-3.59243	NO
Grwd1	-0.343469	5.09748	-2.99687	0.00775679	0.244064	-3.5934	NO
Wdr27	-1.56044	-3.68418	-2.42653	0.0260059	0.377822	-3.60074	NO
Olfr39	-0.96764	-1.55797	-2.53077	0.0209554	0.354618	-3.60205	NO
Tln2	0.630956	6.02704	3.0578	0.00679353	0.229026	-3.60361	NO
Pmch	-1.74542	-1.60275	-2.43911	0.0253405	0.373804	-3.60602	NO
Mcmdc2	-0.792745	-0.999547	-2.54629	0.0202875	0.351273	-3.60854	NO
Vmn1r76	0.526777	1.01973	2.68393	0.0151871	0.311511	-3.61129	NO
Nmnat3	0.707487	2.98617	2.85032	0.010647	0.276435	-3.61349	NO
Trpa1	2.21768	-3.51036	2.43378	0.0256206	0.376807	-3.61366	NO
Osr2	1.57189	0.254691	2.67782	0.0153849	0.313736	-3.61511	NO
Ube2e3	-0.305152	5.92379	-3.0424	0.00702542	0.233121	-3.61701	NO
Igfbp6	1.47446	1.16578	2.65026	0.0163081	0.320578	-3.6202	NO
Speg	1.58402	2.74264	2.82543	0.0112314	0.280168	-3.62336	NO
Egln3	-0.698836	6.43282	-3.05802	0.00679024	0.229026	-3.62512	NO
Tnfaip6	1.22538	-0.100855	2.62384	0.0172425	0.329369	-3.62659	NO
Wnt6	1.08245	0.305618	2.65596	0.0161127	0.319357	-3.62706	NO
Ambp	2.14443	-2.68177	2.51066	0.0218509	0.356698	-3.62885	NO
Smpd3	0.701502	-0.154767	2.60052	0.018109	0.335927	-3.63044	NO
Ankrd34b	-0.883129	0.606455	-2.61995	0.0173841	0.330364	-3.63086	NO
Slco6c1	1.86455	-3.37853	2.49065	0.0227784	0.359132	-3.63098	NO
Ccna1	1.18243	-0.885727	2.52196	0.0213434	0.35559	-3.63347	NO
Mmp28	1.11059	0.550577	2.67485	0.0154818	0.313968	-3.63372	NO
Panx1	0.493345	2.7907	2.81786	0.0114154	0.282345	-3.63887	NO
Vps50	0.516934	4.78395	2.99617	0.00776852	0.244064	-3.64131	NO
Aamdc	0.518348	3.11211	2.79474	0.0119949	0.286258	-3.64578	NO
Klra4	2.28708	-4.43339	2.42133	0.0262853	0.379774	-3.64861	NO
Olfr104-ps	0.909545	-2.75042	2.46194	0.0241738	0.367201	-3.65131	NO
Sned1	0.931998	4.24706	2.95329	0.00852561	0.255353	-3.65703	NO
Olfr165	0.686773	-1.95998	2.49907	0.022384	0.357405	-3.65916	NO
Spta1	2.62729	-3.44439	2.47421	0.0235679	0.362542	-3.66074	NO
Chrm2	2.74436	-3.10702	2.47553	0.0235035	0.362268	-3.66083	NO
Vmn1r49	0.625526	-0.246893	2.59318	0.0183903	0.34029	-3.66303	NO
Rbsn	0.383913	5.11076	2.98133	0.0080228	0.247834	-3.66604	NO
Phpt1	-0.441632	4.31853	-2.89264	0.00971975	0.267084	-3.6677	NO
Nkain3	0.877053	-1.21579	2.50495	0.022112	0.356698	-3.66871	NO
Muc13	1.33876	-0.670495	2.55631	0.0198671	0.350329	-3.66875	NO
Arl4d	0.874747	0.659348	2.62963	0.0170335	0.326887	-3.66965	NO
Uprt	0.518693	1.91074	2.73288	0.0136876	0.299698	-3.67076	NO
Dapp1	0.328327	4.36401	2.89762	0.00961575	0.266891	-3.67124	NO
Trim5	0.832238	-1.33381	2.53323	0.020848	0.354618	-3.67558	NO
Selenon	-0.25798	5.95862	-3.01946	0.00738507	0.237151	-3.67585	NO
Olfr1434	1.43361	-3.43155	2.45092	0.0247309	0.371114	-3.67713	NO
Steap2	1.44618	2.31601	2.78955	0.0121288	0.28663	-3.67801	NO
Kcnab2	-0.359549	4.96123	-2.94593	0.00866267	0.255826	-3.68567	NO
Prdx6b	1.09865	-3.21877	2.4247	0.026104	0.378388	-3.69882	NO
Mapk8ip1	-0.580034	5.29206	-2.96311	0.00834618	0.25151	-3.7061	NO
BC005624	-0.300582	5.244	-2.94331	0.00871191	0.256717	-3.708	NO
Tspan32	1.07094	-0.582311	2.4981	0.0224288	0.357405	-3.70873	NO
Slc38a5	1.36031	-2.75218	2.44609	0.0249785	0.371857	-3.70904	NO
Catspere2	-1.72713	-3.55924	-2.39661	0.0276541	0.385223	-3.71087	NO
Gm12886	1.70961	-1.92625	2.50172	0.0222609	0.3569	-3.71276	NO
Cks2	-0.348404	6.20265	-3.00916	0.00755234	0.240859	-3.71423	NO
Ppp2r1b	0.362452	5.50774	2.99215	0.00783656	0.244779	-3.715	NO
Vmn2r16	0.782061	-2.58831	2.444	0.0250864	0.371857	-3.71821	NO
Tmsb4x	0.436819	9.9449	3.03245	0.00717922	0.235363	-3.71902	NO
Foxf2	1.20092	2.73549	2.76557	0.0127665	0.292286	-3.724	NO
Olfr916	1.18059	-2.19178	2.46672	0.0239362	0.365882	-3.72848	NO
Rgs9	0.714375	2.04983	2.72402	0.0139481	0.301107	-3.73286	NO
Ubap1l	1.3933	-2.16842	2.48265	0.0231597	0.361745	-3.73288	NO
Slc16a10	0.648039	3.33448	2.8239	0.0112685	0.280591	-3.7355	NO
Hsd17b10	-0.34589	6.30448	-3.00464	0.00762679	0.242188	-3.73649	NO
Klk14	2.42059	2.14701	2.73593	0.0135991	0.299698	-3.73847	NO
Tmem198	0.752065	1.28491	2.66034	0.0159643	0.318984	-3.73906	NO
Pof1b	0.798534	5.7826	2.9842	0.00797303	0.247331	-3.74006	NO
Ccdc38	0.776809	0.664128	2.61851	0.0174369	0.330517	-3.7425	NO
Pde10a	2.61423	-3.41947	2.39926	0.0275041	0.384462	-3.74444	NO
Pgf	-0.956244	5.67691	-2.97212	0.00818481	0.250221	-3.74603	NO
Gm8267	2.0275	-4.63954	2.40057	0.0274304	0.384462	-3.74631	NO
Gm20538	1.13922	-5.11154	2.32725	0.0318579	0.407285	-3.75086	NO
Ccl27a	-0.492298	3.23892	-2.76314	0.0128327	0.293325	-3.75125	NO
Krt79	1.68426	4.57103	2.93393	0.00889051	0.257878	-3.75201	NO
Pagr1a	-0.643068	3.67524	-2.78498	0.0122478	0.287065	-3.75236	NO
Dse	0.805333	4.21604	2.89965	0.00957386	0.266891	-3.75467	NO
Ankrd2	1.6419	-1.14286	2.4808	0.0232487	0.361745	-3.75559	NO
Slc5a5	2.13342	-0.569525	2.52705	0.0211182	0.354618	-3.75583	NO
Slc37a1	0.751108	2.07612	2.71828	0.0141195	0.301721	-3.7562	NO
Lrrc46	-0.947786	0.613951	-2.55364	0.0199784	0.351273	-3.75842	NO
Wfdc1	3.23715	-3.18583	2.41374	0.0266986	0.382289	-3.75859	NO
Phf21b	0.543971	1.57343	2.65101	0.0162822	0.320564	-3.76072	NO
Lamtor4	-0.312483	5.4103	-2.94598	0.00866163	0.255826	-3.76079	NO
Exoc8	0.501431	4.86752	2.93886	0.00879615	0.257196	-3.761	NO
Kbtbd8	1.13639	1.8007	2.68538	0.0151404	0.311511	-3.76892	NO
Lactb	0.461564	3.6554	2.82157	0.0113248	0.28132	-3.76896	NO
Adra2c	2.65448	-2.64398	2.43225	0.0257013	0.376867	-3.77198	NO
Trim27	-0.36082	6.30328	-2.98281	0.00799708	0.247558	-3.77452	NO
Padi3	1.69798	3.73285	2.84541	0.0107598	0.276435	-3.77728	NO
Cd209g	2.8896	-2.13797	2.42268	0.0262124	0.379091	-3.77809	NO
Tmco3	0.383994	5.09751	2.94672	0.00864781	0.255826	-3.77862	NO
Vmn1r54	0.99033	-4.01132	2.37109	0.0291371	0.392195	-3.78424	NO
Cln8	0.504528	5.02582	2.91979	0.00916639	0.261595	-3.78484	NO
Tmem220	0.771227	0.331562	2.5786	0.0189617	0.344345	-3.78691	NO
Als2cl	0.666257	5.30373	2.93329	0.00890285	0.257878	-3.78895	NO
Cox8a	-0.478085	7.20929	-2.97751	0.00808952	0.249373	-3.79252	NO
Il15	1.04561	1.28445	2.63879	0.0167075	0.323385	-3.79922	NO
Adssl1	1.40104	2.87474	2.7411	0.0134502	0.298655	-3.80165	NO
Tmem131l	-0.314183	6.23797	-2.96732	0.00827034	0.250754	-3.80166	NO
Vmn1r208	0.901325	0.232565	2.55596	0.0198819	0.350329	-3.8099	NO
Rai14	0.432169	7.1936	2.98446	0.00796861	0.247331	-3.81112	NO
Aox2	1.8337	-3.29364	2.38651	0.0282325	0.388834	-3.81138	NO
Igf2bp1	3.27639	-1.0155	2.51483	0.0216624	0.356597	-3.81382	NO
Gnat1	-1.04847	-1.17414	-2.41813	0.0264591	0.381538	-3.81443	NO
Olfr1122	0.692178	-0.0976064	2.5028	0.022211	0.3569	-3.82113	NO
Mgam	0.636057	4.27997	2.84661	0.0107322	0.276435	-3.82374	NO
Cd200r2	0.921395	-1.53724	2.42905	0.0258715	0.377285	-3.82388	NO
Slc39a4	1.0941	2.94188	2.68928	0.0150158	0.310538	-3.82764	NO
Mical3	0.630735	5.21178	2.91381	0.00928564	0.262271	-3.82908	NO
Olfr352	-0.940906	-0.981428	-2.40738	0.0270501	0.38279	-3.83523	NO
Bin3	0.533792	5.59953	2.92549	0.00905417	0.260105	-3.83703	NO
Olfr786	1.61015	-4.54711	2.33369	0.0314439	0.406213	-3.8371	NO
Acsbg1	0.773666	5.50793	2.9304	0.00895857	0.258003	-3.83725	NO
Mplkip	-0.428743	4.61628	-2.86368	0.0103455	0.273765	-3.83847	NO
Olfr1315-ps1	0.936411	-2.00723	2.40521	0.0271706	0.382953	-3.84155	NO
Dok6	0.644394	-3.2313	2.32892	0.0317501	0.407139	-3.84197	NO
Nap1l5	0.737045	-0.619384	2.47571	0.0234951	0.362268	-3.84299	NO
Mmp27	1.77806	-2.99939	2.378	0.028728	0.391678	-3.84845	NO
Lrtm2	1.98532	-4.07372	2.35098	0.030357	0.399155	-3.84887	NO
Tmem130	1.06469	-1.24684	2.39504	0.0277432	0.385223	-3.85044	NO
Nppc	1.24802	-2.12536	2.37666	0.0288069	0.391678	-3.85071	NO
Ube2s	-0.423148	8.1963	-2.9735	0.00816024	0.249988	-3.85794	NO
Plcb4	0.812417	3.23194	2.75698	0.0130027	0.293574	-3.85838	NO
Slc25a25	-0.27558	4.84267	-2.84765	0.0107083	0.276435	-3.8593	NO
Bdnf	-1.00844	2.08517	-2.62083	0.017352	0.330364	-3.85952	NO
Odf3l1	0.728877	0.992848	2.50589	0.0220687	0.356698	-3.86003	NO
Olfr1366	-1.86903	-3.68346	-2.28811	0.0344855	0.421016	-3.86199	NO
Tomm6	-0.289908	6.30722	-2.94116	0.00875257	0.256717	-3.86223	NO
Ergic2	-0.37577	7.34178	-2.93015	0.00896352	0.258003	-3.86504	NO
Tnfrsf18	-0.753111	4.72642	-2.85001	0.0106541	0.276435	-3.86586	NO
Wdr72	2.29976	-2.21844	2.39196	0.027919	0.386317	-3.86624	NO
Pcbp4	-0.72363	7.10271	-2.95872	0.00842594	0.253396	-3.86635	NO
Oit3	1.27007	-4.34855	2.2988	0.0337488	0.417774	-3.86741	NO
Spata25	1.70248	-4.98389	2.28207	0.0349084	0.422507	-3.86746	NO
Fam214a	0.594629	3.80474	2.74332	0.0133869	0.298655	-3.87289	NO
Gm11444	0.921693	-3.08384	2.34744	0.0305767	0.3992	-3.87293	NO
Agk	0.369271	4.48515	2.8398	0.0108903	0.278171	-3.8759	NO
Wnt10b	2.08665	1.37143	2.57819	0.0189777	0.344345	-3.87662	NO
Pla1a	0.774167	3.60959	2.73158	0.0137257	0.299698	-3.87794	NO
Olfr1161	1.75483	-4.0103	2.33783	0.0311805	0.404579	-3.87917	NO
Tnfrsf4	-0.903876	2.31619	-2.63169	0.0169595	0.326143	-3.87923	NO
Otop1	2.66642	-3.75339	2.35063	0.0303789	0.399155	-3.88098	NO
Cyp2b19	2.59143	0.525428	2.55092	0.0200922	0.351273	-3.88577	NO
Ern2	1.59523	-4.71162	2.28962	0.0343804	0.421016	-3.8862	NO
Pebp1	-0.384568	8.17521	-2.94064	0.00876237	0.256717	-3.88648	NO
Cyp2j6	1.29643	1.38312	2.59083	0.0184816	0.341123	-3.88733	NO
Neu2	1.76709	0.534238	2.5321	0.0208972	0.354618	-3.8915	NO
Slc37a2	0.639944	2.75404	2.68262	0.0152292	0.311511	-3.89265	NO
C1ra	0.531049	3.84517	2.76114	0.0128877	0.293483	-3.89693	NO
Olfr101	1.72517	-3.88127	2.29533	0.0339865	0.419301	-3.9012	NO
Olfr1356	0.701267	-1.8662	2.39896	0.0275211	0.384462	-3.90227	NO
Gm5737	-1.1934	-4.97127	-2.23561	0.0383257	0.438498	-3.90308	NO
Arpp21	2.48494	-4.47508	2.28578	0.0346483	0.421016	-3.90335	NO
Tbc1d2b	0.461288	5.92486	2.91837	0.00919461	0.261595	-3.90348	NO
Ubtfl1	0.725156	-1.37279	2.40458	0.0272056	0.382953	-3.90369	NO
Cnga2	-2.22242	-4.24814	-2.25654	0.0367495	0.433001	-3.90757	NO
Gm8369	1.85581	-4.40799	2.30967	0.0330147	0.413402	-3.90805	NO
Olfr1295	0.996374	-2.68865	2.3625	0.0296523	0.396112	-3.90942	NO
Cyp2d10	1.95657	0.9237	2.56472	0.0195206	0.349723	-3.91583	NO
Gm45692	2.01117	-4.28005	2.30649	0.0332278	0.415094	-3.91651	NO
Npffr1	-0.563361	0.214336	-2.45514	0.0245162	0.370115	-3.91888	NO
Gm14391	0.847319	0.129246	2.48074	0.0232512	0.361745	-3.92119	NO
Cdnf	0.893719	0.3381	2.50839	0.0219543	0.356698	-3.92429	NO
Zfp52	0.537096	4.0624	2.7755	0.0124986	0.289273	-3.93121	NO
Krtap1-3	2.13759	-4.51028	2.28735	0.0345383	0.421016	-3.9324	NO
Adh6b	-1.4235	-3.48608	-2.27363	0.0355075	0.4261	-3.93422	NO
Igll1	1.55819	-4.55391	2.26339	0.036247	0.428864	-3.93653	NO
Efcab9	0.738944	-0.962871	2.40492	0.0271865	0.382953	-3.9393	NO
Shpk	0.743233	2.20753	2.63159	0.0169631	0.326143	-3.94132	NO
Abcb4	1.60887	0.890547	2.52397	0.0212541	0.354618	-3.9419	NO
Tmem191c	0.574556	1.72382	2.56195	0.0196343	0.349723	-3.94352	NO
Gbp11	-1.18878	-4.35785	-2.21656	0.0398136	0.44352	-3.94532	NO
Tmcc3	0.812454	5.57111	2.88923	0.0097915	0.267084	-3.9479	NO
Zfp365	0.824595	0.739494	2.49671	0.0224936	0.357439	-3.94883	NO
Gyg	0.404913	4.91246	2.83957	0.0108956	0.278171	-3.94899	NO
Crbn	0.413661	4.40324	2.81117	0.0115802	0.283452	-3.95088	NO
Pcp4	3.07339	-3.15208	2.34593	0.0306712	0.40008	-3.95257	NO
Chia1	3.27033	-1.88669	2.35403	0.030169	0.399155	-3.95323	NO
Olfr1188	-1.69316	-4.30514	-2.22	0.0395414	0.44352	-3.95545	NO
Ces2b	0.953436	-0.954742	2.41009	0.0268995	0.382289	-3.95583	NO
Mrpl3	0.410574	3.42023	2.69869	0.0147192	0.306117	-3.95607	NO
Catsperd	1.17145	0.626217	2.50825	0.0219608	0.356698	-3.95613	NO
Catsper3	-1.00492	-4.17672	-2.19978	0.041168	0.448294	-3.95947	NO
Sapcd2	-0.553784	4.53932	-2.78942	0.0121322	0.28663	-3.96047	NO
Insig1	-0.43025	5.78726	-2.85177	0.0106137	0.276435	-3.9617	NO
Rims2	1.42096	0.555741	2.51393	0.021703	0.356698	-3.96207	NO
Nps	-1.44313	-3.5529	-2.25338	0.0369837	0.433444	-3.96292	NO
Rptor	0.817948	4.11874	2.81059	0.0115946	0.283452	-3.96432	NO
Ube2c	-0.412428	7.31975	-2.91871	0.00918792	0.261595	-3.9658	NO
Btf3	-0.337851	8.35561	-2.91722	0.00921755	0.261743	-3.96987	NO
Tnmd	1.88628	-4.02512	2.27255	0.0355846	0.4261	-3.97571	NO
Akr1c14	3.07154	-2.1262	2.32829	0.0317909	0.407139	-3.97584	NO
Cdk9	-0.324636	6.56687	-2.89875	0.00959237	0.266891	-3.97815	NO
Lsamp	1.62154	-4.76193	2.24492	0.0376172	0.437366	-3.97858	NO
Csn1s2a	2.87639	-4.29287	2.25326	0.0369926	0.433444	-3.98019	NO
Mmp3	1.3664	2.75653	2.67427	0.0155009	0.313968	-3.98059	NO
Glrp1	1.26108	-0.759373	2.4002	0.0274513	0.384462	-3.98318	NO
Car8	1.68764	1.71371	2.59108	0.0184715	0.341123	-3.98334	NO
Tgfbr3l	0.799076	3.07547	2.65272	0.0162236	0.320259	-3.98372	NO
Tex13b	1.13826	-3.42921	2.29535	0.033985	0.419301	-3.98475	NO
Snapc4	-0.359618	4.7617	-2.79663	0.0119465	0.286258	-3.98498	NO
Hes2	-1.22137	-3.13307	-2.25464	0.0368903	0.433351	-3.98585	NO
Dnmt3l	1.14817	-3.47597	2.27035	0.0357429	0.427006	-3.98684	NO
Pcp2	1.5752	-4.98901	2.23416	0.038437	0.438498	-3.98832	NO
Fxyd1	2.39358	0.442584	2.445	0.0250346	0.371857	-3.9913	NO
Brinp1	2.59017	-2.63494	2.34925	0.0304642	0.399155	-3.99182	NO
Pcdhga11	1.02613	1.56304	2.55612	0.0198752	0.350329	-3.99277	NO
Bri3bp	-0.342755	6.31246	-2.87338	0.0101315	0.270432	-3.99402	NO
C5ar1	0.614081	3.90188	2.72196	0.0140094	0.30111	-3.99523	NO
Fam205a4	1.87322	-4.9892	2.21655	0.0398147	0.44352	-3.99527	NO
Gjd3	1.29629	-4.89872	2.22971	0.0387808	0.439139	-3.99945	NO
Olfr734	-1.66615	-3.73547	-2.20939	0.0403874	0.444713	-3.99974	NO
Mc1r	-0.930487	-0.136921	-2.4034	0.027272	0.383522	-4.00095	NO
Pdlim7	-0.257399	7.47683	-2.88906	0.00979508	0.267084	-4.00239	NO
Asgr1	1.29938	-4.27775	2.19409	0.0416371	0.449607	-4.0025	NO
Ttll6	2.04485	-4.41513	2.2202	0.0395253	0.44352	-4.00376	NO
Mink1	0.302335	7.06041	2.89123	0.00974925	0.267084	-4.00519	NO
Phldb3	-0.311063	5.00567	-2.8048	0.0117392	0.28373	-4.0079	NO
Slc25a4	0.418408	7.51606	2.89827	0.00960235	0.266891	-4.00893	NO
Edn2	-1.08447	2.1342	-2.54781	0.0202231	0.351273	-4.01144	NO
Slc12a2	0.376104	7.44475	2.89286	0.00971508	0.267084	-4.0148	NO
Adam30	1.33182	-3.88685	2.2436	0.0377166	0.437528	-4.01921	NO
Fam24b	1.16612	-3.13564	2.2771	0.0352597	0.424324	-4.02466	NO
Ptgdr2	1.26364	-3.01599	2.23126	0.0386606	0.438827	-4.02579	NO
Itk	-1.07821	-1.44948	-2.30201	0.0335305	0.416747	-4.03236	NO
Dazl	1.21655	-5.25447	2.17987	0.042831	0.454617	-4.03627	NO
Gja5	1.21155	2.67438	2.64927	0.0163423	0.320578	-4.04026	NO
Fam81a	0.946927	2.10816	2.50686	0.0220246	0.356698	-4.04213	NO
Msantd4	0.304905	5.78796	2.83461	0.0110123	0.278171	-4.04218	NO
Dcdc2a	1.56066	0.885067	2.49402	0.02262	0.358155	-4.04736	NO
Bcl2a1d	-0.932698	-0.057218	-2.35954	0.0298318	0.396112	-4.04961	NO
Glipr2	0.880402	3.79854	2.72636	0.013879	0.300936	-4.05156	NO
Vmn1r173	1.138	-2.24035	2.30942	0.0330313	0.413402	-4.05234	NO
Snrpd2	-0.400913	6.4935	-2.84964	0.0106625	0.276435	-4.05325	NO
Sra1	-0.279413	5.21336	-2.79534	0.0119795	0.286258	-4.05327	NO
Rragd	1.19083	1.74996	2.55019	0.0201228	0.351273	-4.05435	NO
Ssna1	-0.560242	5.21623	-2.78585	0.0122251	0.286988	-4.05543	NO
Snx33	0.379922	5.60284	2.81534	0.011477	0.282913	-4.05699	NO
Olfr624	-0.362806	4.97718	-2.78021	0.0123733	0.288525	-4.05706	NO
Mak	2.45936	0.0830468	2.40696	0.0270734	0.38279	-4.05729	NO
Nus1	0.259925	6.04959	2.83313	0.0110473	0.278171	-4.05947	NO
Ctnnal1	-0.533549	5.81157	-2.83267	0.0110583	0.278171	-4.06038	NO
Gatm	0.463409	5.1836	2.7941	0.0120112	0.286258	-4.06039	NO
Lpar5	1.38224	0.116342	2.4145	0.0266574	0.382289	-4.06049	NO
Cryba4	2.10294	1.25619	2.52404	0.0212509	0.354618	-4.0611	NO
Syt15	0.847235	0.406403	2.42074	0.0263175	0.379867	-4.06196	NO
Fbxw21	1.09744	-3.73281	2.21255	0.0401338	0.444205	-4.06197	NO
Ppp1r3g	1.57091	-4.56479	2.1713	0.0435646	0.456898	-4.06256	NO
Sectm1b	1.39749	4.42778	2.72215	0.0140036	0.30111	-4.064	NO
Nmur1	-1.61577	-4.57181	-2.16552	0.0440664	0.459847	-4.06441	NO
Ap1g1	0.27518	7.48671	2.85603	0.010517	0.276324	-4.06448	NO
T2	0.650144	-0.661238	2.35342	0.0302065	0.399155	-4.06791	NO
Col6a4	1.63769	-4.64802	2.20654	0.0406176	0.445917	-4.07087	NO
Fbxo48	0.583258	1.76642	2.52819	0.0210682	0.354618	-4.07139	NO
Arl13a	1.14117	-4.39256	2.17986	0.0428318	0.454617	-4.07377	NO
Efhd1	1.93612	1.82019	2.5523	0.0200345	0.351273	-4.0745	NO
Elovl4	1.13734	3.64719	2.67143	0.0155945	0.314574	-4.07672	NO
Tmem274	1.19211	-4.58193	2.18352	0.0425214	0.45432	-4.07702	NO
Prelid3a	-1.46238	-1.99133	-2.25097	0.0371634	0.434485	-4.07758	NO
Nipal1	0.892836	3.24567	2.6481	0.0163826	0.320578	-4.07954	NO
Matn3	1.9834	-1.168	2.34847	0.030513	0.399155	-4.07957	NO
Gm17067	-1.39452	-3.39475	-2.17645	0.0431224	0.454796	-4.08031	NO
Msl2	0.344139	7.03257	2.80219	0.0118052	0.284828	-4.08248	NO
Gkn3	0.944331	-5.19014	2.11763	0.0484309	0.478344	-4.08463	NO
Ssu2	2.34052	-4.54491	2.20867	0.0404452	0.445018	-4.08563	NO
Fras1	1.08807	0.204738	2.4104	0.0268827	0.382289	-4.08589	NO
Osbpl2	-0.347524	5.46359	-2.80001	0.0118604	0.285695	-4.08769	NO
Csgalnact2	0.597988	5.36485	2.80777	0.0116647	0.28373	-4.08859	NO
Clec4b1	1.90391	-3.89202	2.17953	0.0428593	0.454617	-4.08895	NO
Pax1	3.41025	0.634644	2.47576	0.0234925	0.362268	-4.08985	NO
Olfr183	1.30522	-3.54059	2.20564	0.0406906	0.446388	-4.0945	NO
Avpr1b	1.31898	-3.47058	2.20024	0.0411305	0.448294	-4.09483	NO
Zfp369	0.715397	1.77577	2.52084	0.0213931	0.35559	-4.09575	NO
Olfr816	1.0167	-3.09561	2.12443	0.0477881	0.474341	-4.10104	NO
Brd3os	-0.643889	2.54314	-2.51753	0.0215412	0.356169	-4.10488	NO
Nod1	0.842512	4.04231	2.70029	0.0146692	0.306117	-4.1087	NO
Fabp4	1.73551	4.33634	2.67363	0.0155219	0.313968	-4.10896	NO
Olfr250	-0.762649	-0.660295	-2.29847	0.0337715	0.417774	-4.11408	NO
Olfr588-ps1	0.955175	-2.24027	2.24998	0.0372367	0.434654	-4.11428	NO
Dcun1d4	0.406447	4.92575	2.75988	0.0129223	0.293483	-4.1173	NO
Gda	0.715231	4.85582	2.74006	0.01348	0.298867	-4.12005	NO
Zmat3	0.541689	4.34246	2.72968	0.0137813	0.299698	-4.12146	NO
Nsun4	0.454454	3.48003	2.64872	0.0163613	0.320578	-4.12249	NO
Lrmda	0.746931	0.484126	2.37719	0.0287757	0.391678	-4.13447	NO
Kcnrg	1.58767	0.281518	2.395	0.0277458	0.385223	-4.14458	NO
P2rx1	2.28886	-4.28166	2.17092	0.043598	0.456898	-4.14581	NO
Foxs1	-0.741746	0.544504	-2.33692	0.0312382	0.404972	-4.1462	NO
Ubn2	0.599608	6.39674	2.81243	0.0115489	0.283275	-4.14689	NO
Cspg4	2.34771	3.75736	2.68393	0.0151869	0.311511	-4.14915	NO
Gm15448	1.89547	-3.88391	2.16938	0.0437314	0.45797	-4.15138	NO
Wdr91	0.386906	4.79645	2.73163	0.013724	0.299698	-4.15144	NO
Olfr1297	0.67981	-0.12322	2.31134	0.0329029	0.413219	-4.15246	NO
Svip	1.28674	1.14862	2.44359	0.0251078	0.371857	-4.15312	NO
Fam83b	0.921959	3.40505	2.61079	0.0177225	0.33294	-4.15374	NO
Vcl	0.612303	7.46804	2.82112	0.0113359	0.28132	-4.15376	NO
Trim45	-0.402882	3.24506	-2.56233	0.0196185	0.349723	-4.15406	NO
Sntg2	2.42809	-4.32544	2.15047	0.0453981	0.463909	-4.16312	NO
Ibtk	0.337673	5.85527	2.78594	0.0122227	0.286988	-4.16314	NO
Actr2	0.377834	8.12183	2.80904	0.0116331	0.28373	-4.16462	NO
Ppp1r12a	0.215526	6.46485	2.79506	0.0119866	0.286258	-4.16768	NO
Il27	-1.11461	-1.98086	-2.17992	0.0428266	0.454617	-4.17043	NO
Slc5a7	2.63645	-4.28561	2.1577	0.0447535	0.460678	-4.17056	NO
Slco5a1	1.50036	-0.454412	2.34267	0.0308751	0.402385	-4.1711	NO
Asb16	0.861734	0.964713	2.39478	0.0277582	0.385223	-4.17299	NO
Cask	0.312677	6.79203	2.79732	0.0119289	0.286258	-4.17527	NO
Podnl1	1.6978	0.663236	2.41164	0.0268142	0.382289	-4.17742	NO
Cyp7b1	1.13846	1.54679	2.44375	0.025099	0.371857	-4.17861	NO
Pou5f1	-1.06774	-1.63308	-2.19337	0.0416973	0.449746	-4.1792	NO
Ogdh	0.299461	7.63855	2.80553	0.011721	0.28373	-4.18152	NO
Cct6b	1.02348	-2.33501	2.22286	0.0393158	0.443001	-4.18257	NO
Olfr810	2.60047	-2.64671	2.21485	0.0399497	0.443641	-4.18276	NO
Olfm2	1.18741	2.19408	2.52491	0.0212126	0.354618	-4.18366	NO
Anks4b	0.988981	-2.67889	2.18086	0.0427463	0.454617	-4.18673	NO
Mapkapk3	0.337944	4.93567	2.72033	0.0140579	0.301714	-4.18799	NO
Slc36a1	0.490395	4.7628	2.73146	0.0137292	0.299698	-4.18827	NO
Capn11	-1.04211	-3.19384	-2.08514	0.0516124	0.49272	-4.19337	NO
Rtn4	0.309067	7.96754	2.80476	0.0117404	0.28373	-4.19432	NO
Csnk1g1	0.396388	6.14681	2.78123	0.0123465	0.288463	-4.19555	NO
Gpat3	0.746377	2.73014	2.53595	0.0207302	0.354618	-4.19632	NO
Gm44973	-1.83858	-4.74131	-2.07074	0.0530833	0.497985	-4.19831	NO
Tubd1	0.32949	2.85013	2.53547	0.0207509	0.354618	-4.19846	NO
Mfsd10	-0.335002	6.19996	-2.77211	0.0125895	0.290463	-4.199	NO
Rbl2	0.322234	5.28963	2.7481	0.0132512	0.297819	-4.1992	NO
Clic4	0.511368	8.592	2.7912	0.012086	0.28663	-4.20044	NO
Piwil4	1.48834	-4.82836	2.08824	0.051301	0.492529	-4.20249	NO
Olfr1240	1.03433	-3.65175	2.1516	0.0452967	0.463835	-4.20307	NO
Pomk	0.45834	5.16574	2.7326	0.013696	0.299698	-4.2032	NO
Trmt13	0.752799	0.754834	2.38074	0.0285675	0.390816	-4.20624	NO
Npepl1	-0.336999	5.1037	-2.69404	0.014865	0.308282	-4.20628	NO
Sod3	1.56784	4.52645	2.72823	0.0138238	0.300181	-4.20659	NO
Lmx1b	-1.11849	5.3623	-2.7003	0.014669	0.306117	-4.20716	NO
Slc16a5	-2.39392	-3.48973	-2.08519	0.0516083	0.49272	-4.20733	NO
Hoxc8	1.27104	-1.38563	2.15098	0.0453519	0.463909	-4.20794	NO
Enpp2	1.01337	3.28094	2.58277	0.0187966	0.343999	-4.21062	NO
Cyp26c1	1.57293	-3.48074	2.14301	0.0460716	0.467201	-4.21372	NO
Ublcp1	0.438864	3.58106	2.60526	0.0179297	0.333858	-4.21983	NO
Syne4	-0.873136	4.00761	-2.6008	0.0180985	0.335927	-4.21998	NO
Nop16	-0.292636	4.67658	-2.64775	0.0163948	0.320578	-4.22337	NO
Pcx	-0.806818	5.32712	-2.70393	0.0145565	0.306117	-4.22431	NO
Fam216b	1.61785	-5.30439	2.07389	0.0527577	0.497776	-4.22891	NO
Slc15a1	0.68276	0.030909	2.30666	0.0332162	0.415094	-4.23274	NO
Rnase1	1.7347	-0.669913	2.28876	0.0344404	0.421016	-4.23387	NO
Adrb3	1.84167	-2.04808	2.14081	0.046272	0.467517	-4.23538	NO
Ltf	2.68222	5.34489	2.75784	0.0129788	0.293483	-4.23675	NO
Apobec2	2.22813	1.86086	2.45329	0.02461	0.37043	-4.24163	NO
Fbxo7	0.524485	4.20963	2.65451	0.0161623	0.319775	-4.24202	NO
Il11	1.04215	1.02035	2.39567	0.0277074	0.385223	-4.24233	NO
Olfr239	1.17481	-2.77062	2.16044	0.0445117	0.460678	-4.24315	NO
Zfp248	0.616539	2.85594	2.48058	0.0232591	0.361745	-4.2477	NO
Dmbt1	2.61234	-4.29059	2.09882	0.0502511	0.487521	-4.24954	NO
Cmbl	0.686633	1.13665	2.35977	0.0298177	0.396112	-4.25156	NO
Gm10775	-0.846913	-0.834711	-2.15889	0.0446488	0.460678	-4.25297	NO
Flnc	1.70484	3.5329	2.61903	0.017418	0.330517	-4.25377	NO
Styxl1	0.665779	-1.26552	2.20276	0.0409248	0.447701	-4.25669	NO
Atp9a	-0.477523	7.39201	-2.76856	0.0126852	0.291305	-4.25879	NO
Crp	0.685551	-1.56055	2.21184	0.0401908	0.444205	-4.25936	NO
Atp6v0d2	1.18804	0.819443	2.37239	0.0290594	0.392195	-4.26049	NO
Cog3	0.734277	4.9609	2.70472	0.014532	0.306117	-4.26195	NO
Olfr1162	-1.63843	-3.626	-2.0601	0.0541929	0.504548	-4.26729	NO
Cacfd1	-0.390747	5.40867	-2.6885	0.0150407	0.310617	-4.26828	NO
Abr	0.381422	6.35658	2.75894	0.0129483	0.293483	-4.26864	NO
Abcg4	0.986254	-0.248199	2.23442	0.0384166	0.438498	-4.27514	NO
Gpr141b	-0.921347	-2.68937	-2.10511	0.0496358	0.48484	-4.2761	NO
Sar1b	0.386276	5.24962	2.71107	0.0143375	0.305055	-4.27704	NO
Rpl13a	-0.378911	8.78594	-2.75895	0.0129482	0.293483	-4.27987	NO
Fbl	-0.348559	6.64882	-2.73778	0.0135455	0.299103	-4.28014	NO
Maneal	1.05891	0.223104	2.31506	0.0326559	0.413002	-4.28049	NO
Cda	0.673405	0.00899789	2.21637	0.0398285	0.44352	-4.28094	NO
Gm8108	3.06705	-3.32091	2.15473	0.0450178	0.462211	-4.28136	NO
Fam107b	-0.519373	6.83606	-2.74122	0.0134468	0.298655	-4.282	NO
Unc13d	-0.804652	4.06818	-2.5589	0.0197599	0.350329	-4.28308	NO
Kpna3	0.454581	6.70611	2.74824	0.0132473	0.297819	-4.28389	NO
Ssc4d	-0.677844	1.40426	-2.32797	0.0318114	0.407139	-4.28819	NO
Lgi3	1.3092	0.884373	2.3605	0.0297735	0.396112	-4.28894	NO
Cfap53	-0.939642	-0.301711	-2.2124	0.040146	0.444205	-4.29104	NO
Cacng5	1.25637	-5.01191	1.99304	0.0616878	0.530901	-4.29112	NO
Mctp2	0.690834	1.84396	2.40249	0.0273227	0.383869	-4.29277	NO
Pdzrn4	1.18319	-5.27355	2.01798	0.0587973	0.525033	-4.29288	NO
Timd4	2.01095	-1.71913	2.19467	0.041589	0.449607	-4.2959	NO
Phf24	1.97461	-0.846017	2.24884	0.0373221	0.435307	-4.2985	NO
Ktn1	0.530158	6.61013	2.73758	0.0135514	0.299103	-4.29987	NO
F7	1.0699	-1.298	2.20002	0.0411488	0.448294	-4.30189	NO
Vmn1r14	-0.822996	-2.74095	-2.02543	0.0579579	0.521092	-4.30459	NO
Cts8	0.734846	-3.63722	1.94715	0.0673389	0.548921	-4.3069	NO
Pcdhb7	0.737973	-0.439317	2.20252	0.0409445	0.447701	-4.30812	NO
Skint5	1.39796	-2.68421	2.09288	0.0508378	0.490339	-4.31042	NO
Olfr982	-0.986748	-4.01728	-2.02522	0.0579815	0.521092	-4.31453	NO
Palmd	0.867034	7.01687	2.74314	0.013392	0.298655	-4.31579	NO
Dnajc17	-0.518832	3.14239	-2.47749	0.0234084	0.362268	-4.31983	NO
Ppme1	-0.337411	6.22261	-2.71944	0.0140846	0.301721	-4.32085	NO
Adamts12	0.915343	3.13676	2.45107	0.0247228	0.371114	-4.3226	NO
Prss16	-0.695518	3.99547	-2.54761	0.0202317	0.351273	-4.32305	NO
Sec16b	0.941384	2.41862	2.44974	0.024791	0.371242	-4.3274	NO
Clec4a3	0.817124	0.934693	2.33259	0.0315145	0.406768	-4.32754	NO
Tmem218	0.376319	3.20248	2.49805	0.0224312	0.357405	-4.32908	NO
Slc6a2	1.41722	1.87236	2.38711	0.0281978	0.388767	-4.32944	NO
Pih1d1	-0.455591	6.05418	-2.70519	0.0145176	0.306117	-4.33111	NO
Large2	-0.592338	5.14763	-2.65209	0.016245	0.320259	-4.33216	NO
Ccdc162	1.20792	-1.04727	2.19884	0.0412457	0.448747	-4.33322	NO
Sugct	0.773607	-0.557884	2.24284	0.0377742	0.437528	-4.33377	NO
Asb2	1.36251	1.67336	2.37864	0.0286907	0.391678	-4.33614	NO
C2	1.55333	1.67499	2.37345	0.0289967	0.391734	-4.33792	NO
Mrps12	-0.310555	4.79811	-2.61218	0.0176706	0.332701	-4.3381	NO
Ctdsp1	-0.278297	7.75711	-2.72981	0.0137774	0.299698	-4.34089	NO
Foxo3	0.304987	6.53795	2.71723	0.0141511	0.301958	-4.34295	NO
Sox1	1.10746	-3.58551	2.04395	0.0559185	0.51349	-4.34317	NO
Foxr1	0.764978	-0.479604	2.22534	0.0391211	0.442314	-4.34355	NO
Gal3st4	1.65009	0.0382957	2.29209	0.0342098	0.420951	-4.34557	NO
Olfr704	-0.813334	-1.97829	-2.04965	0.0553044	0.511689	-4.34761	NO
Plscr2	0.473102	3.82352	2.52723	0.0211102	0.354618	-4.34905	NO
Olfr478	-1.23328	-4.27162	-1.99355	0.0616272	0.530901	-4.35299	NO
Olfr1261	0.952463	-1.43531	2.13627	0.0466879	0.469295	-4.35598	NO
Plk5	-0.905995	-1.3915	-2.12997	0.0472707	0.472973	-4.35743	NO
Gm2974	-1.97938	-2.91623	-2.0018	0.0606577	0.530197	-4.35967	NO
Cwf19l2	0.400093	4.36102	2.58107	0.0188637	0.344303	-4.36614	NO
Acad11	0.564079	4.12306	2.57158	0.0192426	0.347555	-4.36659	NO
Tuba3b	-2.54094	-4.04328	-1.99266	0.061732	0.530901	-4.36875	NO
Srp54b	-2.09209	1.61011	-2.13947	0.0463941	0.467517	-4.36904	NO
Sms	-0.337983	5.55407	-2.67455	0.0154917	0.313968	-4.36925	NO
Mapk11	-0.615872	4.03178	-2.51117	0.021828	0.356698	-4.37433	NO
Pi4ka	0.282766	5.58393	2.67658	0.0154254	0.313736	-4.37511	NO
Nt5dc1	0.45756	3.69221	2.53702	0.0206838	0.354618	-4.37576	NO
Sfmbt2	1.12464	-0.691455	2.16195	0.0443795	0.460363	-4.37767	NO
Madcam1	-2.13261	-2.02956	-2.04424	0.0558871	0.51349	-4.38279	NO
Nt5e	0.928655	7.99147	2.7	0.0146784	0.306117	-4.38451	NO
Tmem106a	0.344362	4.24899	2.55843	0.0197795	0.350329	-4.38547	NO
Ccl2	0.788978	1.95209	2.3525	0.0302631	0.399155	-4.39129	NO
Dpt	2.22623	1.51032	2.2942	0.0340642	0.419859	-4.3917	NO
Pir	1.19713	2.74966	2.41082	0.0268596	0.382289	-4.39236	NO
Spout1	-0.511974	4.78658	-2.58579	0.018678	0.343461	-4.39571	NO
Brinp3	1.97049	2.65326	2.41116	0.0268409	0.382289	-4.40135	NO
Kcnj11	3.38363	-2.41164	2.08871	0.0512547	0.492529	-4.40286	NO
Olfr1226	0.788765	-1.16603	2.14938	0.0454961	0.464268	-4.40423	NO
Zfp938	0.648408	1.30083	2.3051	0.0333215	0.415562	-4.40525	NO
Fcrls	0.464645	4.13895	2.53371	0.0208269	0.354618	-4.40568	NO
Pcnx2	1.61822	-4.00014	2.0128	0.059388	0.525467	-4.4109	NO
Ccl7	0.909629	1.96046	2.31135	0.0329023	0.413219	-4.41178	NO
Olfr414	0.542174	-0.200952	2.1943	0.0416198	0.449607	-4.41828	NO
Adamts3	0.775449	1.0062	2.28749	0.0345287	0.421016	-4.42039	NO
Osbpl8	0.379934	5.0879	2.62909	0.0170528	0.326887	-4.42061	NO
Gm11992	1.32119	-1.8566	2.08476	0.0516514	0.49272	-4.42589	NO
Fhl4	0.948772	-1.48625	2.09089	0.0510367	0.49095	-4.43088	NO
Meiob	1.441	-3.49602	2.02716	0.0577653	0.520734	-4.43147	NO
Npw	-1.82188	0.755026	-2.1946	0.0415953	0.449607	-4.43217	NO
Ms4a4b	0.700782	-0.572076	2.15752	0.04477	0.460678	-4.43451	NO
Wasf1	0.443263	3.25629	2.46568	0.0239879	0.365935	-4.43533	NO
Ppard	-0.293493	5.91185	-2.65845	0.0160284	0.319153	-4.43683	NO
Gpx8	0.870889	3.13004	2.39936	0.0274984	0.384462	-4.438	NO
Slc45a3	0.64646	4.14314	2.5187	0.0214887	0.356119	-4.43947	NO
Arntl2	0.965812	3.99374	2.51702	0.0215641	0.356169	-4.4401	NO
Tradd	0.382438	4.44023	2.5698	0.0193143	0.348125	-4.44172	NO
Clca3a2	2.15424	1.13244	2.32802	0.0318082	0.407139	-4.44348	NO
Kcnip3	-0.521462	2.46943	-2.35019	0.0304057	0.399155	-4.44381	NO
Unc5b	0.443471	6.06715	2.66112	0.0159381	0.318891	-4.44511	NO
Gm15319	2.73267	-3.87318	2.03065	0.0573766	0.519132	-4.44594	NO
Mybph	1.85431	-0.401712	2.20391	0.040831	0.447595	-4.44676	NO
Umad1	0.447357	4.02233	2.52438	0.0212362	0.354618	-4.44709	NO
Ociad2	0.682244	4.81193	2.60061	0.0181058	0.335927	-4.44761	NO
Bpifc	0.486992	2.2836	2.33187	0.0315607	0.407009	-4.45076	NO
Glul	0.535751	6.74033	2.63892	0.016703	0.323385	-4.45437	NO
Gm14327	0.631502	-1.22284	2.08325	0.0518035	0.493231	-4.45491	NO
Ext2	-0.290979	6.44226	-2.66147	0.0159264	0.318891	-4.45756	NO
Stag3	3.2953	-0.175329	2.15443	0.0450442	0.462211	-4.45821	NO
Morn3	-1.16367	0.114142	-2.1537	0.0451094	0.462239	-4.46029	NO
Layn	1.05808	0.922573	2.26912	0.0358315	0.427719	-4.46205	NO
Kcnk9	1.54035	-3.68637	1.99887	0.0610012	0.530197	-4.46213	NO
Pdcd1lg2	-1.71868	-3.40803	-1.9433	0.0678336	0.549704	-4.46237	NO
Cxcl15	1.66613	-2.00583	2.01507	0.0591289	0.525467	-4.46433	NO
Vat1l	1.69039	-4.67576	1.93978	0.0682883	0.550708	-4.46437	NO
Bckdhb	0.517006	4.2752	2.54618	0.0202923	0.351273	-4.46589	NO
Rxfp4	1.21124	-4.4529	1.91195	0.0719832	0.556786	-4.46607	NO
Zbtb38	0.435523	5.88452	2.64246	0.0165787	0.322106	-4.46646	NO
Zcchc10	0.392701	3.8829	2.47569	0.023496	0.362268	-4.46703	NO
Sez6l	1.44825	-4.97804	1.93205	0.0692978	0.552356	-4.46724	NO
Hdhd5	0.306233	4.49273	2.53135	0.0209299	0.354618	-4.46836	NO
Fcna	1.96763	-0.712939	2.12112	0.0481003	0.476188	-4.47058	NO
Cyp2r1	1.24505	-1.72854	2.07204	0.0529484	0.497869	-4.47077	NO
Cd5l	2.91109	-2.95766	2.00895	0.0598301	0.526805	-4.47241	NO
Amer2	0.825839	-1.71693	2.02643	0.0578463	0.521092	-4.47414	NO
Enpp4	0.334705	6.5799	2.65408	0.0161772	0.319775	-4.47642	NO
Bhmt	1.24446	-3.52926	2.01265	0.0594049	0.525467	-4.47802	NO
Ogdhl	0.841495	-0.792014	2.09243	0.0508826	0.490339	-4.48001	NO
Zfp831	-1.01202	-2.54781	-1.9665	0.0649019	0.540825	-4.48246	NO
Tacc2	0.58217	6.42895	2.64343	0.016545	0.321876	-4.4847	NO
Jph2	1.9297	1.76188	2.3003	0.0336464	0.417147	-4.4862	NO
Zfp708	-0.949306	0.851468	-2.17746	0.0430362	0.454796	-4.48704	NO
Olfr1087	0.951918	-3.9233	1.97399	0.0639801	0.538764	-4.48914	NO
Hcfc2	0.429833	4.54523	2.54787	0.0202205	0.351273	-4.48944	NO
Tppp3	1.24996	4.40674	2.55142	0.0200712	0.351273	-4.49044	NO
Gm34653	-0.87095	-1.38161	-2.00578	0.0601958	0.529078	-4.49101	NO
Entpd3	0.865744	1.01861	2.21856	0.0396551	0.44352	-4.49141	NO
Cnn1	1.15258	2.24829	2.34077	0.0309949	0.40359	-4.49195	NO
C1d	0.405967	5.39839	2.60942	0.0177735	0.33305	-4.49251	NO
Pik3r4	0.322316	4.59198	2.55599	0.0198803	0.350329	-4.49362	NO
Acbd7	-1.51112	-3.88651	-1.89614	0.0741605	0.559291	-4.49367	NO
Olfr1097	1.57953	-3.30174	1.99648	0.0612809	0.530717	-4.49374	NO
Rbm42	-0.293263	6.69611	-2.63872	0.0167102	0.323385	-4.49436	NO
Gm4756	0.696939	-2.2606	2.04617	0.0556791	0.513207	-4.49954	NO
Tespa1	1.05211	-3.02938	1.96758	0.0647688	0.540825	-4.49967	NO
Lce3c	-1.22183	-5.19014	-1.87506	0.0771539	0.564326	-4.50066	NO
Wwox	-0.281145	3.83644	-2.43783	0.0254073	0.374415	-4.50224	NO
Tmem71	0.889501	1.18935	2.23911	0.0380574	0.438498	-4.50359	NO
Tha1	-0.747866	1.1863	-2.18174	0.0426716	0.454617	-4.50597	NO
Mprip	0.266122	8.73382	2.64722	0.0164132	0.320578	-4.50699	NO
Scml2	1.09103	3.71969	2.45459	0.0245437	0.370115	-4.50722	NO
Csrnp3	1.33779	-0.512076	2.13381	0.0469144	0.47061	-4.50803	NO
Tiam1	0.540772	4.7508	2.56678	0.0194369	0.349581	-4.50808	NO
Slco4c1	-2.03531	-2.84033	-1.91702	0.0712972	0.555618	-4.50879	NO
Zfp804b	1.06822	-4.51477	1.86938	0.0779787	0.566314	-4.50897	NO
Fam228a	1.00365	-2.86608	1.98683	0.062426	0.532889	-4.5102	NO
Defb1	1.9381	-4.78895	1.89948	0.0736954	0.559291	-4.5133	NO
Pmaip1	1.3011	3.88252	2.48921	0.0228466	0.359132	-4.51506	NO
Neurl2	0.692527	0.292823	2.16206	0.0443692	0.460363	-4.5174	NO
Cpn1	1.59572	-5.11256	1.89547	0.0742534	0.559291	-4.52011	NO
Ufsp2	0.353881	4.98183	2.55658	0.0198559	0.350329	-4.52074	NO
Icam4	0.920854	-2.37546	2.01527	0.059106	0.525467	-4.5232	NO
Mbnl3	0.489291	4.06044	2.50948	0.0219047	0.356698	-4.5244	NO
Crispld1	1.81169	0.993196	2.21058	0.0402916	0.444321	-4.52577	NO
Serpinf1	0.820592	3.44637	2.44512	0.0250283	0.371857	-4.52693	NO
Coq4	-0.5717	2.97253	-2.3351	0.0313539	0.40547	-4.52878	NO
Cyren	0.354225	3.80054	2.44059	0.0252634	0.373413	-4.53228	NO
Gdi1	-0.474796	6.20202	-2.61556	0.0175455	0.33204	-4.53607	NO
Spx	-3.1094	-3.25482	-1.89697	0.0740446	0.559291	-4.5364	NO
Efhc1	0.751456	1.4686	2.25306	0.0370075	0.433444	-4.5368	NO
Bmt2	0.463425	5.06517	2.55987	0.0197199	0.350329	-4.53788	NO
Notch2	0.304162	7.57136	2.60535	0.0179262	0.333858	-4.53917	NO
Oxct2a	1.79356	-4.35515	1.90903	0.0723806	0.557153	-4.53955	NO
Adap1	-1.06907	1.36849	-2.17575	0.0431819	0.454796	-4.54021	NO
Cbfb	0.338806	8.21207	2.62866	0.0170682	0.326887	-4.541	NO
Ak1	0.764283	6.13655	2.58442	0.0187316	0.343846	-4.54263	NO
Vmn1r175	0.636211	-3.16266	1.95426	0.0664346	0.545591	-4.54264	NO
Dnajc21	0.24973	5.76387	2.52931	0.0210192	0.354618	-4.54418	NO
Glb1l2	1.85019	-0.222449	2.11355	0.0488209	0.480914	-4.54423	NO
Pcdhgb5	-1.14537	0.896115	-2.1427	0.0460999	0.467201	-4.54725	NO
Sestd1	0.329902	7.0157	2.61015	0.0177462	0.332961	-4.5478	NO
Hsh2d	0.921134	2.13157	2.27876	0.0351423	0.424145	-4.54807	NO
Gm14124	1.26062	-4.26627	1.90021	0.0735936	0.559291	-4.55004	NO
Kcnd3	1.30293	-2.36943	1.96722	0.0648122	0.540825	-4.55144	NO
Mup22	4.27406	-2.59561	1.99931	0.0609496	0.530197	-4.55158	NO
Spag6	-1.09177	-0.309942	-2.075	0.0526439	0.497338	-4.55162	NO
Dlk2	0.853876	0.0304965	2.10449	0.0496964	0.48484	-4.55167	NO
BC035044	1.18143	-2.90369	1.95746	0.0660304	0.544392	-4.55178	NO
Med10	-0.305752	5.15796	-2.54629	0.0202875	0.351273	-4.55236	NO
Afp	0.875707	-3.48907	1.88698	0.0754478	0.561346	-4.55241	NO
Zfand3	-0.250572	5.84961	-2.58687	0.0186355	0.343107	-4.55255	NO
Leap2	1.25531	-2.6619	1.98669	0.0624427	0.532889	-4.55359	NO
Pirb	-0.388579	1.60958	-2.14784	0.045634	0.465354	-4.55384	NO
Fbxo43	-0.712643	-1.60637	-2.00209	0.0606243	0.530197	-4.55711	NO
Fnip1	0.451788	5.53675	2.58884	0.0185588	0.342121	-4.55808	NO
Tspan7	-0.471926	5.81859	-2.56935	0.0193324	0.348125	-4.5592	NO
Gm13290	-2.09191	-3.26618	-1.88992	0.0750319	0.560515	-4.55982	NO
Adamts15	0.629912	4.92815	2.54056	0.0205317	0.354586	-4.56004	NO
Tex19.1	1.31841	-4.09528	1.89895	0.0737692	0.559291	-4.56035	NO
Oaz3	0.911075	-1.38025	2.0528	0.0549675	0.509511	-4.56406	NO
Smr3a	2.80334	-2.20237	1.97037	0.0644245	0.540199	-4.56537	NO
Atp1b2	1.08597	2.54164	2.31801	0.0324611	0.411875	-4.56676	NO
Pcdhb10	-1.72537	-2.7442	-1.93528	0.0688749	0.552356	-4.5668	NO
Erc2	1.40981	-4.28838	1.85492	0.0801118	0.57142	-4.56704	NO
Cpe	0.439972	8.73981	2.61174	0.0176873	0.332701	-4.56817	NO
Trp53tg5	1.62929	-3.90409	1.93892	0.0684003	0.55114	-4.56861	NO
Gip	-1.22511	-4.73425	-1.83921	0.0824897	0.576179	-4.5687	NO
Mab21l1	-0.972793	-1.89912	-1.93481	0.068936	0.552356	-4.56948	NO
Kcnj12	0.937909	-0.0771286	2.11179	0.0489896	0.481612	-4.57142	NO
Egf	0.903202	-0.7109	2.04712	0.0555763	0.5129	-4.57155	NO
Gdf9	0.728519	-1.4315	2.01244	0.0594291	0.525467	-4.57281	NO
Gm8439	1.73666	-4.62605	1.88205	0.0761494	0.56349	-4.57595	NO
Prss32	2.17086	-1.13062	1.96241	0.0654106	0.542005	-4.5795	NO
Olfr629	1.53875	-4.6621	1.88233	0.0761094	0.56349	-4.58068	NO
Bmp3	1.35989	-0.525126	2.07949	0.0521848	0.495146	-4.58169	NO
Slc5a3	0.42924	4.99365	2.52049	0.0214086	0.35559	-4.58196	NO
Mtfp1	0.565384	1.19871	2.18865	0.0420905	0.451349	-4.58275	NO
Olfr1312	0.54553	0.261081	2.11228	0.0489423	0.481467	-4.5854	NO
Sybu	1.39284	0.010166	2.12523	0.0477129	0.474341	-4.58683	NO
Lig4	0.421749	3.87309	2.43417	0.0256	0.376807	-4.58693	NO
Zbtb9	-0.489845	4.32985	-2.44148	0.0252172	0.373103	-4.58868	NO
Angptl4	0.660762	2.38825	2.26777	0.0359291	0.427846	-4.59155	NO
Gm2897	3.20212	-0.704146	2.1286	0.047398	0.473851	-4.5925	NO
Akr1b3	0.629928	5.16148	2.54464	0.0203576	0.351991	-4.59278	NO
Galnt15	1.41509	2.08067	2.24293	0.0377676	0.437528	-4.59435	NO
Amd1	0.28213	7.38084	2.57147	0.019247	0.347555	-4.59445	NO
Chpf	0.453662	4.54247	2.51576	0.0216204	0.356448	-4.59713	NO
Tmem100	1.74645	2.24131	2.26453	0.036164	0.428864	-4.60141	NO
Castor2	0.536838	4.8615	2.50833	0.0219574	0.356698	-4.60245	NO
Gopc	0.358211	4.92367	2.51091	0.02184	0.356698	-4.60394	NO
Cd3eap	-0.301093	5.14625	-2.51928	0.0214629	0.356091	-4.60401	NO
Mybpc2	3.21971	4.00164	2.44878	0.02484	0.371242	-4.60712	NO
Gm12888	2.07452	-0.499198	2.11692	0.0484985	0.478344	-4.60739	NO
Olfr658	-1.1967	-3.31152	-1.85877	0.0795394	0.569403	-4.61039	NO
Npl	0.7464	3.51759	2.40846	0.0269898	0.382468	-4.61055	NO
AU018091	0.652188	3.49098	2.35377	0.030185	0.399155	-4.61121	NO
Pmf1	-0.525431	6.63185	-2.58407	0.0187455	0.343846	-4.61683	NO
Olfr1033	0.635097	2.65452	2.31444	0.0326967	0.413002	-4.6174	NO
Samd13	1.21798	-2.30277	1.92243	0.0705721	0.553996	-4.61807	NO
Tdrd9	0.660785	-2.55078	1.94046	0.0682006	0.550601	-4.62105	NO
Clptm1	-0.379979	6.15588	-2.56349	0.019571	0.349723	-4.62195	NO
Sdcbp2	0.967618	2.32988	2.27962	0.0350815	0.423931	-4.62206	NO
Lgalsl	0.507423	6.04164	2.5713	0.0192537	0.347555	-4.62283	NO
Ush1g	-0.995617	-4.25068	-1.81594	0.0861241	0.586756	-4.62723	NO
Kcnj13	-1.59655	-3.56587	-1.82262	0.0850673	0.583627	-4.62759	NO
Alkbh8	0.39661	4.53303	2.46149	0.0241966	0.367201	-4.63638	NO
Cltc	0.349082	8.22975	2.5802	0.0188979	0.344345	-4.63892	NO
Nyx	0.672973	0.487494	2.12531	0.0477062	0.474341	-4.64075	NO
Mal2	0.644411	6.85417	2.58263	0.0188021	0.343999	-4.6409	NO
Cacng8	-0.924576	-4.56346	-1.78894	0.0905179	0.594567	-4.64165	NO
Sctr	1.56576	-2.88065	1.92369	0.0704037	0.553569	-4.64266	NO
Chadl	-3.5465	1.5082	-2.03288	0.0571304	0.518492	-4.64284	NO
Fa2h	2.31832	-4.66534	1.85661	0.0798604	0.570222	-4.64295	NO
Abcc5	1.01777	3.9902	2.42754	0.0259518	0.377541	-4.64394	NO
Nol11	0.416713	5.42412	2.52405	0.0212505	0.354618	-4.64493	NO
Olfr215	1.24879	-5.07226	1.80846	0.0873218	0.590923	-4.6455	NO
Zfp354a	0.593354	2.28413	2.24785	0.0373961	0.435826	-4.64816	NO
Fbxl15	-0.419617	3.95048	-2.37679	0.0287997	0.391678	-4.64878	NO
Tspan33	0.507684	4.18653	2.44654	0.0249553	0.371857	-4.65128	NO
Nedd4	0.290327	9.41359	2.56248	0.0196123	0.349723	-4.65166	NO
Pdpk1	0.298373	6.47608	2.57352	0.0191643	0.347215	-4.65167	NO
Chchd5	-0.54368	3.93408	-2.36488	0.0295088	0.395038	-4.65168	NO
Abcc3	0.421855	4.54691	2.46504	0.0240193	0.365935	-4.65188	NO
Mb	2.39728	1.9407	2.25544	0.0368312	0.433001	-4.6523	NO
Crybb1	2.05056	-3.33474	1.87817	0.076706	0.56423	-4.65324	NO
Pdpr	0.398637	3.76225	2.40665	0.0270903	0.38279	-4.65428	NO
Mief2	0.447298	3.4771	2.36509	0.029496	0.395038	-4.65519	NO
Cd209e	2.06491	-4.24529	1.85103	0.0806954	0.572774	-4.65538	NO
Tmod4	0.947473	3.43418	2.33887	0.0311148	0.404082	-4.65799	NO
H60b	1.11872	-1.5374	1.96964	0.0645134	0.540199	-4.65925	NO
Tia1	0.287827	6.42542	2.53441	0.0207967	0.354618	-4.66149	NO
Ppp1r14c	0.764981	2.63489	2.24423	0.0376691	0.437528	-4.66262	NO
Esrrb	0.87619	-3.05016	1.91895	0.0710374	0.554528	-4.66284	NO
Ubox5	-0.34945	3.82002	-2.3738	0.0289759	0.391734	-4.66317	NO
Braf	0.54124	5.81479	2.53158	0.0209199	0.354618	-4.6635	NO
Nr1i3	0.711842	-1.8637	1.94288	0.0678886	0.549704	-4.66526	NO
Asb18	0.749927	0.520012	2.10982	0.0491792	0.482512	-4.66623	NO
Cdh15	1.87356	3.00649	2.36019	0.0297926	0.396112	-4.66698	NO
Cep89	-0.509696	5.01183	-2.46221	0.0241602	0.367201	-4.66703	NO
Zxdb	0.346535	4.41559	2.42454	0.0261125	0.378388	-4.66779	NO
Odf4	1.07922	-3.48564	1.84802	0.0811492	0.574388	-4.66999	NO
Gm2115	1.28589	0.31412	2.10922	0.0492374	0.482762	-4.67294	NO
Ccdc92	-0.462574	5.10426	-2.46025	0.0242587	0.367766	-4.67314	NO
Mmd2	1.39922	-3.47467	1.88137	0.0762471	0.56349	-4.67434	NO
Krt86	0.924449	-3.15675	1.88482	0.0757546	0.562672	-4.67498	NO
Ccdc60	0.719667	-0.371185	2.03873	0.0564866	0.516459	-4.67635	NO
Shisal2a	-1.00483	-5.24497	-1.74769	0.097607	0.607797	-4.67801	NO
Kcnk15	1.5886	-4.1958	1.80978	0.0871109	0.590578	-4.67808	NO
Olfr683	-0.638978	-5.13227	-1.75595	0.0961496	0.60389	-4.68171	NO
Fam13c	1.56377	0.361625	2.11667	0.0485227	0.478344	-4.68226	NO
Suv39h1	-0.242489	6.56117	-2.55627	0.0198687	0.350329	-4.68285	NO
Nxt1	-0.328091	5.09198	-2.457	0.0244218	0.36948	-4.68297	NO
Ang4	-1.04476	-3.87717	-1.75311	0.0966482	0.605302	-4.68509	NO
Ovgp1	0.557845	1.86836	2.19568	0.041506	0.449607	-4.68609	NO
Zfp354b	1.12074	-2.43127	1.9234	0.0704426	0.553569	-4.68653	NO
Jmjd1c	0.436362	4.97229	2.48647	0.0229769	0.360034	-4.68653	NO
Gm4922	-1.41783	-2.51322	-1.82445	0.0847793	0.583627	-4.68957	NO
Kitl	0.421498	5.25763	2.50235	0.0222319	0.3569	-4.69174	NO
Trappc11	0.25494	5.56105	2.50971	0.0218944	0.356698	-4.69313	NO
Omg	1.4957	-4.10558	1.83018	0.0838846	0.582341	-4.69349	NO
Acot12	1.1306	-1.85064	1.90843	0.0724631	0.557286	-4.69418	NO
Edem1	0.387758	6.4848	2.54841	0.0201979	0.351273	-4.69481	NO
Ddx50	0.208233	5.82724	2.52922	0.0210228	0.354618	-4.69611	NO
Olfr1419	-0.608268	-2.54423	-1.82523	0.0846569	0.583627	-4.6968	NO
Anxa8	1.05373	8.03753	2.5337	0.0208275	0.354618	-4.69891	NO
Gm2026	-1.68297	-2.44754	-1.85267	0.0804489	0.57221	-4.69926	NO
Sim1	2.3051	-1.15287	1.98258	0.0629365	0.534616	-4.70065	NO
Tead2	-0.333425	7.12953	-2.55091	0.0200926	0.351273	-4.70134	NO
Vmn2r11	0.813623	-0.165734	2.01757	0.0588445	0.525033	-4.70213	NO
Kcnmb2	2.07354	2.85944	2.27325	0.0355347	0.4261	-4.70433	NO
Gm8159	-2.05907	-4.21478	-1.75976	0.0954844	0.602363	-4.70443	NO
Sesn1	0.365675	4.41174	2.3687	0.0292797	0.393397	-4.70462	NO
Slc25a18	1.07053	-0.474642	1.9946	0.0615033	0.530901	-4.70499	NO
Fam241a	0.392172	3.20298	2.2907	0.0343058	0.421016	-4.70614	NO
Efnb3	-0.578897	2.03338	-2.15859	0.0446753	0.460678	-4.70657	NO
Pon2	0.496453	6.25853	2.53374	0.0208258	0.354618	-4.70658	NO
Prox1	1.46595	-2.04082	1.94427	0.0677097	0.549662	-4.70661	NO
Dnase1l2	-1.22214	0.339476	-2.01394	0.0592572	0.525467	-4.70677	NO
Elovl2	0.684514	-2.08707	1.90928	0.0723465	0.557153	-4.7077	NO
Naaladl2	0.771996	4.0803	2.37357	0.0289893	0.391734	-4.708	NO
Cdk5rap1	-0.317536	2.77362	-2.23368	0.038474	0.438498	-4.70843	NO
Sf3b4	-0.321979	6.61902	-2.53858	0.0206165	0.354618	-4.70917	NO
Ssh2	0.385422	5.36969	2.50202	0.0222471	0.3569	-4.7093	NO
Znhit1	-0.322347	5.99251	-2.4974	0.0224618	0.357405	-4.71219	NO
BC016579	1.16056	2.28743	2.20057	0.0411034	0.448294	-4.7134	NO
Nsf	0.382004	5.25482	2.4975	0.0224569	0.357405	-4.71592	NO
Gm11733	0.939277	-4.88201	1.71379	0.103788	0.614958	-4.71724	NO
H2-M5	1.07724	-5.05385	1.78398	0.0913463	0.595896	-4.71859	NO
Chrm4	1.15092	-2.24596	1.89797	0.0739053	0.559291	-4.72023	NO
Rspo3	-1.91945	-0.360157	-1.97418	0.0639568	0.538764	-4.72101	NO
Ptger3	1.53124	-0.810787	1.94161	0.0680522	0.549704	-4.72127	NO
Olfr1321	0.562775	-0.00458088	2.04092	0.056248	0.514915	-4.72206	NO
Tmem203	-0.371562	2.46654	-2.14422	0.0459614	0.466521	-4.72541	NO
Foxo1	0.274462	6.2463	2.51557	0.0216292	0.356448	-4.72565	NO
Serpinb9c	1.16388	-3.22697	1.7734	0.0931344	0.599234	-4.72731	NO
Olfr1290	0.918928	-3.46335	1.81087	0.0869357	0.590045	-4.73097	NO
Cacng3	1.59297	-5.20922	1.76083	0.0952984	0.602363	-4.7315	NO
Nek5	1.00636	-0.51928	2.00059	0.0607996	0.530197	-4.73161	NO
Sdhd	0.238494	6.74857	2.52851	0.0210542	0.354618	-4.73247	NO
Aqr	-0.26058	5.91095	-2.49328	0.0226545	0.358155	-4.73301	NO
Glo1	0.284659	3.43142	2.31221	0.0328451	0.413219	-4.73326	NO
Ift74	-0.387188	5.38988	-2.46825	0.0238605	0.365823	-4.73362	NO
BC029722	-0.355519	4.71971	-2.41217	0.026785	0.382289	-4.73383	NO
Wdr81	0.357781	5.21152	2.47826	0.023371	0.362268	-4.73454	NO
Slc10a4	1.2542	-4.64507	1.75974	0.0954869	0.602363	-4.7346	NO
Kif9	0.458561	1.91038	2.16028	0.044526	0.460678	-4.73508	NO
Dmkn	1.07462	6.63615	2.48888	0.0228622	0.359132	-4.73509	NO
Tmem252	0.964446	1.41823	2.10322	0.0498195	0.484927	-4.73638	NO
Bach1	0.269253	6.17121	2.4673	0.0239076	0.365823	-4.73721	NO
Ikzf2	0.903442	3.69573	2.37172	0.0290994	0.392195	-4.73803	NO
Itih4	1.68313	-2.97927	1.85234	0.0804993	0.572293	-4.73862	NO
Krt87	0.88416	0.362003	2.0677	0.0533982	0.500304	-4.73898	NO
Rhox8	0.918427	-0.599032	1.98335	0.0628444	0.534232	-4.74185	NO
Olfr600	0.759861	0.460473	2.05803	0.0544113	0.505943	-4.74201	NO
Kirrel3	0.735875	1.56272	2.13401	0.0468957	0.47061	-4.74215	NO
Rasgrp4	0.978439	1.36756	2.13726	0.0465963	0.468692	-4.74216	NO
Ddx25	1.92238	-3.40926	1.86039	0.0792989	0.568993	-4.7426	NO
Rps23	-0.28994	6.52753	-2.51709	0.0215607	0.356169	-4.74516	NO
Samd12	0.727387	2.92943	2.2647	0.0361519	0.428864	-4.74589	NO
Popdc2	1.52837	-0.0779039	2.01308	0.0593552	0.525467	-4.74638	NO
Olfr628	0.742011	-1.25427	1.9315	0.0693698	0.552356	-4.74648	NO
Banp	-0.443225	5.61432	-2.45419	0.0245641	0.370115	-4.74657	NO
Anxa5	-0.330531	8.45832	-2.5309	0.0209494	0.354618	-4.74816	NO
Arpc1a	-0.302395	7.39785	-2.52497	0.0212099	0.354618	-4.75064	NO
Glp2r	1.41761	-4.59172	1.78469	0.0912258	0.595896	-4.7523	NO
Olfr1219	0.639513	-2.5458	1.85317	0.080375	0.57196	-4.75287	NO
Slc25a34	1.7499	-2.72712	1.8636	0.0788251	0.568646	-4.75428	NO
Senp7	0.334051	4.47422	2.41233	0.0267761	0.382289	-4.75553	NO
Ooep	0.712436	-1.30891	1.92863	0.0697486	0.552356	-4.75641	NO
Gfra4	1.01961	-4.89123	1.7133	0.103879	0.614958	-4.7576	NO
Pak4	-0.288769	6.28034	-2.49369	0.0226351	0.358155	-4.75952	NO
Mlf1	0.550435	4.60077	2.41763	0.026486	0.381553	-4.76155	NO
Pgr	1.42865	0.188609	2.05364	0.0548771	0.508992	-4.76162	NO
Olfr1535	0.995893	-3.06931	1.84047	0.0822965	0.575478	-4.76271	NO
Bank1	2.03807	-3.4344	1.81928	0.0855944	0.58461	-4.76284	NO
Prkd1	-0.644138	4.41418	-2.37457	0.0289302	0.391734	-4.76401	NO
Tmem139	0.460753	2.0712	2.14016	0.0463306	0.467517	-4.76617	NO
Tbc1d15	0.375987	4.90501	2.43032	0.0258039	0.377102	-4.76711	NO
Kcnk3	0.897338	-0.655531	1.91926	0.0709957	0.554528	-4.76767	NO
Zfp263	0.254929	5.27668	2.44435	0.0250683	0.371857	-4.76797	NO
Krt16	1.80911	3.62905	2.31748	0.0324959	0.411875	-4.76819	NO
Cpd	0.347249	7.48057	2.51025	0.02187	0.356698	-4.76896	NO
Gm10310	0.854611	-2.44313	1.86472	0.0786603	0.56797	-4.76952	NO
Fxyd5	0.495304	6.68481	2.50862	0.0219442	0.356698	-4.77255	NO
Uts2	-1.80797	-4.61902	-1.71546	0.103474	0.614889	-4.77319	NO
Zmynd19	-0.315592	5.98651	-2.482	0.0231906	0.361745	-4.7737	NO
Gm45844	-1.34634	1.78283	-2.10326	0.0498154	0.484927	-4.77773	NO
Fnd3c2	-0.677121	-3.545	-1.7615	0.0951813	0.602363	-4.77861	NO
Mtmr11	1.88517	-2.6325	1.72907	0.10096	0.611318	-4.77861	NO
Glt8d2	1.01185	-1.42161	1.91221	0.0719479	0.556786	-4.77957	NO
Aldh1a3	1.06778	6.71423	2.50537	0.0220926	0.356698	-4.77976	NO
Mbnl2	0.692063	6.30827	2.50052	0.0223165	0.357256	-4.78	NO
Fbxo9	0.293044	4.68643	2.38336	0.028415	0.389221	-4.78046	NO
Tbx22	1.2277	-5.17609	1.71268	0.103995	0.614973	-4.78087	NO
Ikzf1	0.530465	3.58882	2.31446	0.0326956	0.413002	-4.78117	NO
Esyt3	0.597646	6.34425	2.50368	0.0221707	0.3569	-4.78169	NO
Pde4d	0.603351	4.3705	2.38475	0.0283344	0.388834	-4.78306	NO
Rhbdl3	0.555037	3.25582	2.3046	0.0333553	0.415632	-4.78314	NO
Rpl10l	-1.42076	-4.60601	-1.69967	0.10646	0.619135	-4.78452	NO
Avl9	0.548981	5.64979	2.48028	0.0232736	0.361745	-4.78473	NO
Otogl	0.95936	-5.21568	1.69198	0.10794	0.621865	-4.78594	NO
Thsd7a	1.04295	1.43724	2.08765	0.0513608	0.492538	-4.78605	NO
Tle1	-0.28345	5.90734	-2.43248	0.0256892	0.376867	-4.78713	NO
D13Ertd608e	1.51795	-4.80009	1.76548	0.0944923	0.600893	-4.79043	NO
Dnd1	-1.61863	-0.480751	-1.84273	0.0819518	0.575143	-4.79232	NO
Ahcyl2	0.379546	4.63128	2.4164	0.0265535	0.381703	-4.79242	NO
Prss50	0.911689	-1.80256	1.85358	0.0803131	0.57196	-4.79298	NO
Tcf21	0.862388	-3.38434	1.72936	0.100907	0.611318	-4.79339	NO
Tigar	1.33818	2.64224	2.23617	0.0382827	0.438498	-4.79415	NO
Adam33	1.57291	-1.0259	1.87708	0.0768622	0.564326	-4.79537	NO
Cpne8	1.11983	4.19554	2.38722	0.0281911	0.388767	-4.79575	NO
Arl6ip5	0.411669	6.62966	2.49624	0.0225159	0.357439	-4.79941	NO
Ykt6	0.30296	6.72299	2.5002	0.0223315	0.357256	-4.80012	NO
Poli	-0.568534	3.65812	-2.26704	0.035982	0.428131	-4.80077	NO
Stk10	0.458997	5.76967	2.47361	0.0235971	0.362575	-4.80202	NO
Ak6	-0.329148	6.70908	-2.49166	0.0227309	0.358977	-4.80222	NO
Ablim3	1.29982	0.51063	2.03161	0.0572708	0.518492	-4.80233	NO
Il17rd	0.690111	3.73574	2.31809	0.0324561	0.411875	-4.80364	NO
Ckap4	0.470983	7.25909	2.49579	0.0225366	0.357439	-4.80377	NO
Sebox	1.43105	-3.75093	1.78107	0.0918338	0.596314	-4.80425	NO
Fat3	1.0877	-2.54271	1.80493	0.0878923	0.591275	-4.80458	NO
Bend4	1.00523	2.1476	2.18618	0.0422973	0.45291	-4.80461	NO
Paqr9	1.41784	-2.27055	1.82898	0.08407	0.582533	-4.80737	NO
Dnm3	0.821555	0.956363	2.07302	0.0528473	0.497869	-4.80792	NO
Clec4a2	0.720503	1.30786	2.09515	0.050613	0.490067	-4.80837	NO
Tor2a	-0.299799	5.11875	-2.41287	0.0267468	0.382289	-4.80941	NO
Ccdc184	-1.06539	-1.04995	-1.87062	0.0777979	0.565893	-4.80988	NO
Tnrc6b	0.27186	6.33245	2.47416	0.0235704	0.362542	-4.81035	NO
Gdap1	1.2724	-4.10967	1.71462	0.103631	0.614889	-4.81322	NO
Stard8	0.719662	2.71293	2.19473	0.0415843	0.449607	-4.81329	NO
Mxra8	0.976541	5.28716	2.44479	0.0250454	0.371857	-4.81406	NO
Eps8l2	-0.440644	6.37254	-2.47576	0.0234927	0.362268	-4.81463	NO
Olfr116	-1.13115	-4.55167	-1.69352	0.107642	0.621603	-4.81541	NO
Cldn9	-0.954678	0.511014	-1.97355	0.0640343	0.538764	-4.81675	NO
Paqr8	0.640007	2.6722	2.21145	0.0402215	0.444211	-4.81684	NO
Rrad	0.444667	1.88217	2.11034	0.0491297	0.482347	-4.81877	NO
Star	0.356978	3.66787	2.28603	0.034631	0.421016	-4.81933	NO
Cracr2b	-0.529612	6.27956	-2.43309	0.025657	0.376867	-4.81944	NO
Maml1	0.277509	5.6453	2.44915	0.0248211	0.371242	-4.82003	NO
Syngr4	-0.825993	0.048544	-1.93617	0.0687586	0.552356	-4.82455	NO
Ccdc81	-1.72397	-4.25049	-1.70278	0.105866	0.618118	-4.82631	NO
Zfp945	0.350998	3.73568	2.28563	0.0346589	0.421016	-4.827	NO
Kremen1	0.413466	5.32473	2.42883	0.0258831	0.377285	-4.82891	NO
Crip1	0.253475	7.76494	2.48758	0.0229239	0.359717	-4.83024	NO
Rad51ap2	1.22073	-4.16279	1.67695	0.110884	0.627991	-4.83307	NO
Gpc3	-0.766386	2.83391	-2.14075	0.046277	0.467517	-4.83313	NO
Spin2c	0.631815	-0.0345376	1.94646	0.0674283	0.548921	-4.83614	NO
Ido1	0.77921	-2.33669	1.79668	0.0892389	0.592913	-4.83643	NO
Ntmt1	-0.412491	3.34332	-2.23238	0.0385741	0.438498	-4.83671	NO
Apof	1.30411	-4.40442	1.70191	0.106033	0.618355	-4.83679	NO
Timm10b	-0.297052	4.43202	-2.33052	0.0316474	0.407139	-4.83867	NO
Dst	1.09478	5.94945	2.46465	0.0240388	0.365935	-4.83881	NO
Ppfia4	-1.0495	-1.32032	-1.86292	0.0789251	0.568993	-4.83925	NO
Arl3	-0.496833	5.28949	-2.39689	0.027638	0.385223	-4.8393	NO
Tmc7	1.37202	0.161214	1.99259	0.061741	0.530901	-4.84003	NO
Zbtb16	1.37798	-0.232635	1.93295	0.0691793	0.552356	-4.84126	NO
Atf1	0.272132	6.31351	2.45215	0.0246679	0.370923	-4.84187	NO
Pxdn	0.772052	6.03101	2.46466	0.0240382	0.365935	-4.84205	NO
Olfr366	0.478673	0.0328416	1.93168	0.0693459	0.552356	-4.84235	NO
Gp1ba	0.742538	0.795947	2.02838	0.0576287	0.520456	-4.84365	NO
Tmem30a	0.421845	7.6175	2.46765	0.0238902	0.365823	-4.84367	NO
Adck5	-1.73816	-1.05041	-1.82315	0.0849843	0.583627	-4.84385	NO
Scn2a	1.3818	-2.12214	1.80568	0.0877709	0.591275	-4.84428	NO
Miga2	-0.316736	4.98469	-2.38489	0.028326	0.388834	-4.84442	NO
Mapt	1.04746	1.46192	2.0732	0.0528291	0.497869	-4.84579	NO
Olfr744	1.33029	-3.84134	1.73751	0.0994281	0.60992	-4.84709	NO
Gm13090	-0.953691	-5.09932	-1.64809	0.11673	0.636968	-4.84716	NO
Btn1a1	1.29123	-0.741412	1.92273	0.0705311	0.55397	-4.84994	NO
Prr33	2.02719	3.38362	2.27181	0.0356382	0.4261	-4.85022	NO
Srpk3	2.1316	-2.17864	1.85876	0.0795409	0.569403	-4.85101	NO
Vsig8	1.73815	-0.520571	1.896	0.0741793	0.559291	-4.85329	NO
Gm37240	1.39009	0.0528478	1.98802	0.0622842	0.532844	-4.85382	NO
Tbcel	0.917855	3.41348	2.26392	0.0362082	0.428864	-4.85409	NO
Ankrd34a	-0.785064	-0.234788	-1.89544	0.0742583	0.559291	-4.85459	NO
Slc6a4	1.40303	-2.46014	1.81867	0.085691	0.58461	-4.85498	NO
Isg20	-0.891163	4.54114	-2.32372	0.0320871	0.409152	-4.85754	NO
Cyld	0.22948	6.442	2.45461	0.0245431	0.370115	-4.85928	NO
Synj1	0.328659	4.59927	2.34948	0.0304501	0.399155	-4.86023	NO
Unc93a	0.976729	-2.21473	1.77549	0.0927787	0.59824	-4.86196	NO
Zfp9	0.893	2.84786	2.19408	0.0416384	0.449607	-4.86277	NO
Nkx2-1	1.71115	-4.5762	1.66639	0.112994	0.629613	-4.86406	NO
Olfr394	0.681525	-0.586583	1.91476	0.0716021	0.555876	-4.86471	NO
M6pr	0.341086	7.93535	2.4702	0.0237643	0.364765	-4.8648	NO
Etv4	-0.761527	5.53066	-2.40874	0.0269746	0.382468	-4.86926	NO
Gdnf	1.15332	-1.31715	1.84949	0.0809272	0.573403	-4.8694	NO
Gm50092	0.922717	-2.2188	1.79775	0.0890639	0.592913	-4.87046	NO
Masp2	1.6259	-4.19091	1.7268	0.101376	0.611318	-4.87235	NO
Stab1	0.746996	4.00141	2.32786	0.0318189	0.407139	-4.87262	NO
Cd163	0.619935	2.97736	2.19389	0.0416539	0.449607	-4.8745	NO
Rorc	-0.391595	4.56253	-2.31497	0.0326615	0.413002	-4.87486	NO
Lactb2	0.544129	4.24907	2.325	0.0320039	0.408444	-4.8772	NO
Deup1	0.886401	-0.215984	1.95016	0.0669555	0.547324	-4.87846	NO
Ptp4a3	0.672614	5.07004	2.40459	0.0272052	0.382953	-4.8787	NO
Ubn1	0.302476	7.36147	2.44918	0.0248198	0.371242	-4.87884	NO
Mrap2	0.42704	-0.165999	1.91412	0.0716895	0.555894	-4.88326	NO
Ube2b	0.256431	7.42172	2.45863	0.02434	0.368621	-4.88352	NO
Nmrk2	0.903399	-0.48293	1.90994	0.0722567	0.557153	-4.88501	NO
Zyg11b	0.220166	5.72152	2.38045	0.0285847	0.390816	-4.88793	NO
Wwp1	0.329185	5.5682	2.40877	0.026973	0.382468	-4.88797	NO
Mei4	-1.11443	-1.92216	-1.76417	0.0947187	0.601814	-4.89074	NO
Radx	0.908838	-0.73602	1.87519	0.0771349	0.564326	-4.8917	NO
Urm1	-0.381808	4.87289	-2.33006	0.0316771	0.407139	-4.89284	NO
Agap1	-0.229071	6.53263	-2.39156	0.0279417	0.386317	-4.89389	NO
Vmn1r185	0.687567	-1.88063	1.80494	0.087891	0.591275	-4.89526	NO
Ccdc192	1.20824	-3.20606	1.74673	0.0977769	0.607841	-4.89596	NO
Pno1	0.340622	5.14573	2.3691	0.0292556	0.393397	-4.89631	NO
Vmn2r75	0.60044	-1.59776	1.8163	0.0860668	0.586733	-4.89688	NO
Cables1	0.647404	3.52437	2.21884	0.0396325	0.44352	-4.89747	NO
Fahd1	-0.402581	3.54232	-2.21542	0.0399043	0.443641	-4.89755	NO
Stx1a	1.25528	-0.802543	1.88571	0.0756282	0.562016	-4.89774	NO
Tmem253	0.55022	0.107558	1.91608	0.0714234	0.555665	-4.90244	NO
Olfr120	-0.662902	-2.65538	-1.68938	0.108444	0.6231	-4.90247	NO
Tomm40	-0.378744	6.37821	-2.43002	0.0258195	0.377102	-4.90412	NO
Ttyh3	-0.386302	7.2972	-2.43947	0.0253219	0.373804	-4.9059	NO
Grm5	-1.17966	-4.98903	-1.61219	0.124368	0.648341	-4.90609	NO
Meioc	1.3198	-2.60021	1.77382	0.0930619	0.599234	-4.9064	NO
Gnb3	0.835194	-5.4482	1.575	0.13272	0.65783	-4.90662	NO
Taf1	0.485209	5.05883	2.39163	0.0279377	0.386317	-4.90714	NO
Fcgr4	0.678871	1.78498	2.04743	0.0555424	0.5129	-4.90746	NO
Kdm8	-0.50053	2.61624	-2.11049	0.0491151	0.482347	-4.9081	NO
Cnr2	0.642541	-0.00712331	1.91528	0.0715325	0.555665	-4.90848	NO
Ctnnbip1	-0.267709	6.86624	-2.43135	0.0257489	0.377099	-4.90911	NO
Gm1141	0.816719	-0.223787	1.90406	0.0730626	0.559291	-4.90914	NO
St6galnac3	0.697118	0.0181255	1.92117	0.0707402	0.554528	-4.90981	NO
Tsku	0.603666	3.83071	2.25824	0.0366242	0.432289	-4.91033	NO
Vmn1r210	1.30453	-3.73534	1.73512	0.0998594	0.610239	-4.91158	NO
Ccdc43	0.307649	5.45795	2.37708	0.0287824	0.391678	-4.91402	NO
Tecta	1.30706	-4.92344	1.64131	0.118142	0.639942	-4.91532	NO
Slc24a1	1.13355	-4.19387	1.64386	0.117608	0.63969	-4.91685	NO
Zdbf2	1.26725	-3.41165	1.70454	0.105532	0.61776	-4.91727	NO
B4galnt3	1.01655	2.68722	2.16577	0.0440448	0.459847	-4.91789	NO
Lsmem2	0.833223	-5.19937	1.56611	0.134786	0.659369	-4.91935	NO
Olfr1124	0.441195	0.274395	1.92	0.0708962	0.554528	-4.92014	NO
Cmc1	0.37656	4.34012	2.30126	0.0335815	0.416747	-4.92267	NO
Sycp2	-1.43812	-3.61244	-1.63006	0.120514	0.642655	-4.92402	NO
Gan	0.544889	6.13389	2.41602	0.026574	0.381703	-4.9247	NO
Slc7a10	1.27089	-4.49269	1.63413	0.119651	0.64143	-4.92636	NO
Vav2	-0.352478	5.49795	-2.37468	0.028924	0.391734	-4.92661	NO
Slc9a9	0.887261	1.41208	2.0329	0.057128	0.518492	-4.92723	NO
Tmem184a	-0.39709	5.83538	-2.3893	0.0280713	0.387746	-4.92751	NO
Olfr814	0.573535	-1.9068	1.79026	0.0902985	0.594432	-4.93005	NO
Gm14305	2.61123	-3.2398	1.77913	0.092161	0.596677	-4.93008	NO
Dsc1	1.57508	-3.62847	1.69979	0.106436	0.619135	-4.93133	NO
Cd55	1.09701	1.60829	2.02132	0.0584205	0.523127	-4.93195	NO
Nat8f7	1.3256	-2.9051	1.74752	0.0976362	0.607797	-4.93283	NO
Atp10b	0.500162	6.04626	2.40158	0.027374	0.384224	-4.93328	NO
Tmem40	0.818427	3.54379	2.207	0.0405806	0.445917	-4.9342	NO
Tlr4	0.411332	4.31541	2.27812	0.0351874	0.424145	-4.93567	NO
Morn4	-0.701924	4.77479	-2.28255	0.0348748	0.422507	-4.93706	NO
Foxg1	-1.22684	-3.611	-1.63445	0.119584	0.64143	-4.93731	NO
Tinag	0.858064	-5.41694	1.55503	0.137398	0.663408	-4.93766	NO
Dnlz	-0.355872	4.82297	-2.31833	0.0324398	0.411875	-4.93771	NO
Slc35f3	1.5058	-1.57971	1.82242	0.0850986	0.583627	-4.93806	NO
Cxcr4	-0.597447	4.58585	-2.29319	0.0341337	0.420365	-4.93863	NO
Gpr174	0.697818	-2.84405	1.67927	0.110426	0.627383	-4.93974	NO
Gmpr	1.01936	1.90519	2.04358	0.0559587	0.51354	-4.94008	NO
Taok1	0.326936	7.05478	2.42365	0.0261605	0.378711	-4.94043	NO
Actr5	-0.67841	2.79808	-2.10423	0.0497214	0.48484	-4.9405	NO
Tmem88	-0.708477	1.17091	-1.92921	0.0696722	0.552356	-4.94104	NO
Ezh1	0.282638	6.03078	2.41087	0.0268569	0.382289	-4.9417	NO
Cd164	0.394428	7.95447	2.42794	0.0259302	0.377541	-4.94329	NO
Atm	0.353495	4.53586	2.26359	0.0362325	0.428864	-4.9436	NO
Olfr735	0.389934	2.15541	2.05867	0.0543443	0.505638	-4.94479	NO
Lancl2	0.417584	3.23461	2.17938	0.0428726	0.454617	-4.94651	NO
Ruvbl2	-0.415322	6.61458	-2.4164	0.0265532	0.381703	-4.94799	NO
Olfr748	0.750484	-1.17714	1.80306	0.0881961	0.592037	-4.94894	NO
Spag9	0.397675	6.85314	2.42622	0.0260223	0.377822	-4.94949	NO
Olfr798	0.776216	-3.62684	1.68764	0.108783	0.623362	-4.95031	NO
Chac1	-0.600123	2.46469	-2.03209	0.0572168	0.518492	-4.95203	NO
Fgd2	-1.07835	1.84415	-1.99982	0.0608893	0.530197	-4.95341	NO
Stk16	-0.371129	4.11809	-2.2348	0.0383877	0.438498	-4.95363	NO
Ceacam19	0.885816	0.460361	1.90511	0.0729186	0.559084	-4.9538	NO
Susd1	0.61187	1.75149	2.02567	0.0579318	0.521092	-4.95414	NO
Coq8a	1.01367	3.51056	2.19087	0.041905	0.450669	-4.95443	NO
Chrna10	1.4034	-4.92039	1.61436	0.123895	0.647816	-4.95515	NO
Ghdc	0.402158	3.33482	2.1758	0.0431778	0.454796	-4.95635	NO
Ctsh	0.391198	5.49243	2.36436	0.0295401	0.395099	-4.95642	NO
Isyna1	-0.357502	6.53157	-2.39529	0.0277289	0.385223	-4.95677	NO
Fcmr	-1.33272	-4.48746	-1.573	0.133184	0.65783	-4.95847	NO
Acy3	-0.691974	2.80192	-2.09186	0.05094	0.490339	-4.95861	NO
Sdhaf1	-0.407932	3.61612	-2.17111	0.0435814	0.456898	-4.95942	NO
Crisp1	1.01137	-3.79689	1.58394	0.130672	0.655505	-4.96289	NO
Armc12	0.826439	-5.25157	1.53769	0.14157	0.668004	-4.96412	NO
Kif17	-1.04158	-1.42202	-1.76248	0.0950119	0.602363	-4.96444	NO
Ap5z1	-0.31829	5.03377	-2.30226	0.0335136	0.416747	-4.96536	NO
Npr3	0.885658	0.78183	1.95895	0.0658433	0.543757	-4.96781	NO
Lemd3	0.391453	4.95516	2.33502	0.031359	0.40547	-4.96867	NO
Ackr1	2.83549	-1.79896	1.80518	0.0878525	0.591275	-4.96939	NO
Ube2d1	0.294759	5.03794	2.3041	0.0333891	0.415703	-4.97028	NO
Tmem8b	-0.351662	3.36742	-2.16268	0.0443155	0.460363	-4.97103	NO
Olfr887	0.997633	-0.554983	1.85471	0.0801442	0.57142	-4.97179	NO
Gm45618	0.991504	-4.79596	1.60223	0.126561	0.650482	-4.97311	NO
Adi1	-0.235793	5.44675	-2.31774	0.0324787	0.411875	-4.97387	NO
Dpm2	-0.302776	4.82053	-2.27959	0.0350836	0.423931	-4.9742	NO
H2-T3	0.690237	-0.337873	1.85847	0.0795841	0.569403	-4.97481	NO
Rbpjl	1.29765	-3.5416	1.68636	0.109032	0.623536	-4.97503	NO
Olfr1205	0.547914	-0.884567	1.80702	0.0875556	0.591275	-4.97536	NO
Tmem132e	1.56118	-1.94875	1.76083	0.0952977	0.602363	-4.97657	NO
Saxo2	-0.558468	1.37629	-1.96733	0.0647991	0.540825	-4.97741	NO
Brip1	0.336442	5.40314	2.3604	0.02978	0.396112	-4.97754	NO
Gm10563	-0.873702	-0.898465	-1.77208	0.0933582	0.599704	-4.97828	NO
Ypel2	0.671943	3.55672	2.21473	0.0399595	0.443641	-4.98081	NO
Hdac2	0.217533	6.84137	2.37388	0.0289713	0.391734	-4.98262	NO
Olfr1457	1.18313	-3.68167	1.66239	0.113802	0.632844	-4.98273	NO
B4galt3	-0.385375	6.40932	-2.38335	0.0284153	0.389221	-4.98379	NO
Cpne1	-0.420109	5.52168	-2.34906	0.0304758	0.399155	-4.9859	NO
Zdhhc12	-0.300824	3.74721	-2.17635	0.0431312	0.454796	-4.98625	NO
Efcab8	-0.654802	-2.21892	-1.6725	0.11177	0.627991	-4.9864	NO
Xkr6	1.10068	-4.49995	1.57979	0.131619	0.655505	-4.98665	NO
Lcorl	0.466769	4.99754	2.30575	0.0332776	0.415366	-4.98752	NO
Cd70	1.24589	-5.13227	1.58049	0.13146	0.655505	-4.98914	NO
Ccl9	0.912133	3.8471	2.21734	0.0397515	0.44352	-4.99033	NO
Trub1	-0.409037	2.8313	-2.06156	0.0540392	0.50407	-4.9918	NO
Mat2b	0.30968	5.36797	2.33989	0.0310502	0.403954	-4.99324	NO
Cxcl2	-1.20741	-0.0604732	-1.78983	0.0903692	0.594432	-4.99432	NO
Txndc2	-1.57464	-2.46717	-1.66148	0.113986	0.633205	-4.99895	NO
Mettl7b	-1.08322	1.20066	-1.95038	0.0669263	0.547324	-4.9993	NO
AY074887	0.717528	-1.64792	1.72661	0.10141	0.611318	-4.9995	NO
Trim44	-0.347425	6.99888	-2.39295	0.0278622	0.386304	-4.99955	NO
Sh2d4b	0.883144	-0.13901	1.8518	0.0805801	0.572317	-4.99996	NO
Gm21103	2.83549	-3.66965	1.69424	0.107503	0.621285	-5.00004	NO
Morn2	-0.526969	3.54473	-2.14552	0.0458434	0.466388	-5.00055	NO
Tubb1	1.4442	-5.19014	1.57807	0.132015	0.656711	-5.00069	NO
Npffr2	1.44537	-4.51917	1.56747	0.134468	0.658998	-5.00086	NO
Taf2	0.360496	5.19579	2.31915	0.0323863	0.411875	-5.00143	NO
Gm45015	0.52019	0.0199357	1.86064	0.0792624	0.568993	-5.00163	NO
Sall4	0.547544	-5.50036	1.47537	0.157442	0.690749	-5.00316	NO
Olfr316	1.00353	-1.29379	1.78108	0.0918324	0.596314	-5.00398	NO
Zfp266	0.352983	6.6956	2.36671	0.0293984	0.394633	-5.00504	NO
Pcdh9	-0.946272	-4.98201	-1.53599	0.141983	0.668004	-5.00545	NO
Pon3	0.472619	4.13017	2.2023	0.0409619	0.447701	-5.00624	NO
Tfcp2l1	0.741062	6.30193	2.38598	0.0282629	0.388834	-5.00675	NO
Pex11a	-0.350652	3.77284	-2.1822	0.0426326	0.454617	-5.00708	NO
Otof	-2.02924	-3.50732	-1.59248	0.128737	0.651004	-5.0071	NO
Plscr4	0.890449	1.23037	1.9799	0.0632613	0.535924	-5.00827	NO
Casp4	0.78436	2.73196	2.07794	0.0523428	0.495211	-5.01006	NO
Phlda2	-1.35444	0.607434	-1.86201	0.0790597	0.568993	-5.01272	NO
Fgd1	-0.27535	6.22606	-2.37117	0.029132	0.392195	-5.01286	NO
Scube3	1.18901	3.61477	2.18174	0.0426722	0.454617	-5.01476	NO
Polr2i	-0.41259	4.30648	-2.22465	0.039175	0.442585	-5.01594	NO
Clvs2	-0.651845	-1.1671	-1.59386	0.128427	0.650482	-5.01679	NO
Cnot11	-0.324281	5.57557	-2.33899	0.0311074	0.404082	-5.01702	NO
Gm2042	2.10277	-1.32627	1.77681	0.0925544	0.597577	-5.01762	NO
Peg10	1.68921	0.353063	1.89726	0.0740037	0.559291	-5.01819	NO
Ankzf1	-0.412647	4.52282	-2.2374	0.0381886	0.438498	-5.01886	NO
Gsdma3	2.17109	-3.51841	1.65461	0.115386	0.635122	-5.01894	NO
Olfr730	0.790372	-4.11196	1.5113	0.148121	0.675465	-5.01897	NO
Mmp2	1.29849	6.37691	2.38509	0.0283145	0.388834	-5.02087	NO
Tmem65	0.310185	6.15194	2.35348	0.0302028	0.399155	-5.02115	NO
Dlgap3	0.632982	-0.128349	1.845	0.0816064	0.574682	-5.02194	NO
Unc5a	0.644156	-1.45018	1.70775	0.104923	0.6172	-5.02229	NO
Prss48	1.69845	-3.78751	1.66023	0.114239	0.633205	-5.02425	NO
Gm10800	1.04135	-2.09001	1.66651	0.11297	0.629613	-5.02441	NO
Actc1	-1.9083	-2.82503	-1.635	0.119468	0.64143	-5.02598	NO
Zfp775	0.349644	2.57208	2.0346	0.0569403	0.518492	-5.0261	NO
Sfrp1	0.995509	5.65212	2.36064	0.0297649	0.396112	-5.02715	NO
Rpgrip1l	0.333937	4.63818	2.27764	0.0352221	0.424216	-5.02768	NO
Rai2	1.33218	-0.590083	1.83669	0.0828774	0.578102	-5.02824	NO
Krt1	0.764339	-2.32457	1.67679	0.110917	0.627991	-5.02968	NO
Rsad1	0.478173	4.24304	2.24615	0.037524	0.436803	-5.03041	NO
Azi2	0.374114	5.97405	2.3511	0.0303498	0.399155	-5.03074	NO
H2-Bl	2.62637	1.2	1.98417	0.0627454	0.534005	-5.03113	NO
Bnipl	-0.245876	6.24196	-2.35938	0.0298415	0.396112	-5.03152	NO
Pdcd6	-0.231749	6.52049	-2.34793	0.0305462	0.399155	-5.03184	NO
Negr1	2.09534	-3.58328	1.63806	0.118823	0.640611	-5.03207	NO
Cnga3	0.510189	-0.160042	1.83379	0.0833236	0.579961	-5.03387	NO
Pstpip2	0.372058	3.64339	2.18401	0.0424796	0.454203	-5.03532	NO
Sar1a	0.188234	7.17846	2.33529	0.0313418	0.40547	-5.03616	NO
Syndig1l	1.39994	-4.77471	1.5801	0.131548	0.655505	-5.03654	NO
Wfdc15a	1.45295	-4.10654	1.59826	0.127444	0.650482	-5.03659	NO
Aire	-1.80749	-2.81593	-1.57209	0.133393	0.65783	-5.03659	NO
Cacna2d1	1.58805	1.68452	1.98916	0.0621487	0.532301	-5.04131	NO
Slc35d3	-0.960226	-2.16355	-1.64501	0.117369	0.639272	-5.0414	NO
Uts2r	1.56803	1.88405	1.99932	0.0609481	0.530197	-5.04215	NO
Msantd2	0.383955	4.28476	2.21656	0.0398136	0.44352	-5.04255	NO
Specc1	0.309371	6.65174	2.35912	0.0298573	0.396112	-5.04267	NO
Calca	1.72913	-2.63466	1.68465	0.109367	0.624542	-5.04354	NO
Cryzl2	0.7372	2.12427	2.02001	0.0585681	0.524131	-5.04393	NO
Gm27021	0.677669	0.57751	1.88812	0.0752863	0.561232	-5.04618	NO
B3galt6	-0.278121	4.44416	-2.22975	0.038778	0.439139	-5.04664	NO
Gpr150	1.39559	-4.46192	1.57272	0.133247	0.65783	-5.04669	NO
Mrps15	-0.344548	5.83686	-2.33022	0.0316665	0.407139	-5.0469	NO
Pbx3	-0.319254	4.94534	-2.27212	0.0356157	0.4261	-5.04774	NO
Arhgap18	0.474974	3.48766	2.16231	0.0443471	0.460363	-5.04779	NO
F9	0.972317	-2.95101	1.65779	0.114736	0.633582	-5.04919	NO
Eif3c	-0.312033	8.51913	-2.37542	0.0288803	0.391734	-5.04922	NO
Uchl1	0.7425	0.527625	1.87558	0.0770779	0.564326	-5.0503	NO
Pcid2	0.345649	5.81489	2.35062	0.0303795	0.399155	-5.05089	NO
Asb17	-1.28104	-3.89842	-1.52569	0.144519	0.672464	-5.05215	NO
Kcns3	1.63522	-1.73514	1.72144	0.102364	0.613137	-5.05462	NO
Smim40-ps	0.610523	-5.2896	1.43738	0.167817	0.698418	-5.05477	NO
Hsf2bp	1.13047	-2.10806	1.68497	0.109304	0.624542	-5.05499	NO
Pax7	-0.645606	-5.03288	-1.47814	0.156707	0.689082	-5.05539	NO
Map3k3	0.268245	5.98166	2.34984	0.0304277	0.399155	-5.05633	NO
Tpx2	-0.337158	7.31483	-2.36562	0.0294643	0.395038	-5.05642	NO
Elfn2	-0.850088	-5.29711	-1.49347	0.152689	0.684457	-5.05731	NO
Sdk2	2.29186	2.47446	2.07231	0.0529206	0.497869	-5.05786	NO
Fam131b	0.736569	0.436429	1.85085	0.0807221	0.572774	-5.05793	NO
Smim31	0.872861	-2.7095	1.64312	0.117762	0.639764	-5.0582	NO
Alkal2	-2.15471	-1.63491	-1.64394	0.117592	0.63969	-5.05865	NO
Cdkl3	0.468566	1.02906	1.89927	0.0737242	0.559291	-5.05965	NO
Gpr68	0.491457	0.275585	1.84617	0.081429	0.574414	-5.05972	NO
Gpr63	0.671932	-2.09254	1.70086	0.106233	0.618824	-5.05977	NO
C1ql2	1.16353	-1.7558	1.68412	0.109472	0.624542	-5.06172	NO
Ccr10	-0.926858	-2.30058	-1.5716	0.133508	0.65783	-5.06294	NO
Vmn2r13	0.480933	-0.525946	1.74236	0.098557	0.608654	-5.06326	NO
Zc3h12c	1.04309	2.27666	2.06548	0.0536288	0.501827	-5.06432	NO
Cfap54	0.80319	-0.805635	1.77189	0.0933919	0.599704	-5.06434	NO
Gm14419	0.792293	-4.99529	1.50428	0.149904	0.680026	-5.06449	NO
Gm826	-0.674868	-2.22543	-1.59916	0.127243	0.650482	-5.06638	NO
Gm49380	1.33963	-2.71323	1.62432	0.121741	0.643548	-5.06653	NO
Pitx2	2.46307	-3.93022	1.61541	0.123667	0.64754	-5.06713	NO
Nr4a3	0.990833	2.09231	2.01211	0.0594668	0.525486	-5.0684	NO
Nkain2	-1.89321	-3.34535	-1.54484	0.139836	0.666072	-5.0686	NO
Barhl2	-1.16924	-4.88695	-1.48965	0.153682	0.686127	-5.0692	NO
Cd209d	2.12729	-1.88956	1.65501	0.115305	0.635061	-5.07299	NO
Obox1	-0.420956	-5.35416	-1.3915	0.181083	0.709098	-5.07346	NO
Cyp4f14	0.914771	-5.25432	1.48461	0.155	0.686931	-5.07667	NO
Vmn1r65	1.02332	-0.673266	1.78035	0.0919555	0.596677	-5.07821	NO
Kcna3	1.0816	-3.41422	1.59576	0.128	0.650482	-5.07895	NO
Olfr1341	0.678403	-1.44453	1.7312	0.100571	0.610622	-5.07998	NO
Dgkk	1.97731	-2.02002	1.69448	0.107457	0.621285	-5.08015	NO
Aatk	-0.906975	3.78757	-2.12748	0.0475028	0.473937	-5.08093	NO
Dnah6	1.02184	-1.29293	1.70913	0.104663	0.616521	-5.08336	NO
Nt5c1b	-0.84533	-5.29492	-1.46228	0.160956	0.693207	-5.08524	NO
Baiap2l2	-0.97469	-1.75352	-1.66079	0.114125	0.633205	-5.0853	NO
Thrb	1.44351	-1.45654	1.71811	0.10298	0.613978	-5.08788	NO
Tbc1d10c	-0.546055	-1.6591	-1.64193	0.118013	0.639942	-5.0879	NO
Cpne6	-0.753739	-5.32575	-1.46752	0.159542	0.693207	-5.0882	NO
Patl2	-1.20935	-4.45545	-1.49972	0.151075	0.682278	-5.08833	NO
Uroc1	-1.1409	-3.81384	-1.51106	0.148182	0.675534	-5.08908	NO
Glce	0.240474	5.84203	2.29148	0.0342519	0.421016	-5.09088	NO
Ust	1.08113	1.70285	1.97514	0.063839	0.538656	-5.09195	NO
Tro	1.42036	0.228714	1.84572	0.0814979	0.574414	-5.09314	NO
Cfhr1	0.772356	-2.13735	1.67536	0.1112	0.627991	-5.09439	NO
Arhgap15	-0.938559	-0.273576	-1.73199	0.100427	0.610239	-5.09742	NO
Nol4	1.54403	-3.92244	1.59055	0.129173	0.652315	-5.09787	NO
Sucla2	0.317111	6.20833	2.32843	0.031782	0.407139	-5.09891	NO
Il10	1.86447	-0.393604	1.77845	0.0922762	0.596892	-5.0995	NO
Usp53	0.402912	5.11505	2.27494	0.0354139	0.425832	-5.09962	NO
Nell1	0.816904	-5.30997	1.46247	0.160905	0.693207	-5.10017	NO
Olfr1204	0.76633	-2.20948	1.65809	0.114675	0.633582	-5.10045	NO
Lbhd2	-1.27903	-0.277207	-1.72312	0.102054	0.613137	-5.10093	NO
Suclg2	0.625644	4.87034	2.25115	0.0371494	0.434485	-5.10109	NO
Tmem50b	-0.345713	5.60882	-2.28567	0.0346561	0.421016	-5.10211	NO
Rpl28	-0.386597	8.27221	-2.34827	0.0305253	0.399155	-5.10247	NO
Snx22	-0.571098	2.26696	-1.96249	0.0654006	0.542005	-5.10272	NO
Best3	1.59242	-4.41186	1.53801	0.14149	0.668004	-5.10352	NO
Olfr78	1.37756	-1.30279	1.73201	0.100424	0.610239	-5.10435	NO
Dcun1d2	0.440212	4.15719	2.19269	0.0417533	0.449802	-5.10503	NO
Slc6a20b	0.574663	0.501235	1.84082	0.0822426	0.575478	-5.10549	NO
Washc2	0.386833	6.27734	2.32581	0.0319517	0.40813	-5.10605	NO
Pcdhb15	1.27512	-3.35386	1.62656	0.121262	0.643279	-5.10657	NO
Olfr1509	-0.630716	-5.02092	-1.41874	0.173109	0.704501	-5.10741	NO
Pjvk	-0.670931	-2.32426	-1.60509	0.125928	0.650157	-5.10762	NO
Ddo	0.89372	0.0448815	1.78894	0.0905169	0.594567	-5.10821	NO
Dop1b	0.406654	4.6588	2.20679	0.0405974	0.445917	-5.1102	NO
Egr3	1.00091	3.32314	2.10399	0.0497449	0.48484	-5.11037	NO
Cntn3	-1.34872	-4.81201	-1.45679	0.162449	0.695662	-5.1106	NO
Cacna2d3	1.48055	-4.62581	1.51272	0.147763	0.675465	-5.11344	NO
Dchs2	1.11795	0.568739	1.86524	0.0785844	0.56797	-5.11478	NO
Actl7b	-1.79413	-4.65823	-1.46881	0.159195	0.693207	-5.11633	NO
Dop1a	0.684586	3.51373	2.13923	0.0464161	0.467517	-5.11688	NO
Meig1	0.774075	-5.39339	1.4511	0.164008	0.696103	-5.11704	NO
Tmc5	0.581174	-1.56509	1.63928	0.118567	0.640471	-5.11762	NO
Gm43191	1.51945	-4.24249	1.54986	0.13863	0.664757	-5.11769	NO
Vmn1r181	0.706287	-1.48019	1.66182	0.113916	0.633078	-5.11822	NO
Olfr1057	-1.11171	-1.8291	-1.59969	0.127124	0.650482	-5.11843	NO
Tlr11	1.10116	-5.22153	1.47375	0.157873	0.690898	-5.12016	NO
Cysltr1	0.556663	1.49081	1.90917	0.0723624	0.557153	-5.12037	NO
Vmn1r193	0.907523	-1.53837	1.68405	0.109485	0.624542	-5.12044	NO
Gm31371	0.927988	-5.22462	1.42433	0.171509	0.702737	-5.1211	NO
Plekhb2	0.350973	6.66106	2.31929	0.0323773	0.411875	-5.12196	NO
Ceacam20	-0.544061	-1.22406	-1.65942	0.114404	0.633582	-5.12259	NO
Olfr1234	0.765614	-3.18596	1.59874	0.127336	0.650482	-5.12264	NO
Ino80c	-0.346747	5.48765	-2.2623	0.0363266	0.429463	-5.12383	NO
Bmp2	1.02941	4.54865	2.20954	0.0403754	0.444713	-5.12421	NO
Vgll1	2.00451	-3.34347	1.63535	0.119394	0.641314	-5.12432	NO
Sumo1	-0.256879	7.49779	-2.31322	0.0327779	0.413219	-5.1263	NO
Olfr44	-0.716477	-2.25495	-1.5961	0.127926	0.650482	-5.12664	NO
Gsg1	0.458545	-1.82701	1.63789	0.118858	0.640611	-5.12703	NO
Olfr1099	1.06537	-4.9391	1.48517	0.154855	0.686931	-5.12769	NO
Cfap126	0.678807	-0.124761	1.78217	0.0916484	0.595896	-5.12784	NO
Specc1l	0.292773	6.09718	2.31201	0.0328581	0.413219	-5.12934	NO
Ttll10	-0.654227	2.39443	-1.94425	0.067712	0.549662	-5.12951	NO
Fasl	0.748796	-3.10414	1.56819	0.134301	0.658998	-5.13014	NO
Sharpin	-0.437029	3.87856	-2.08196	0.0519344	0.493795	-5.13254	NO
Cenpk	-0.338752	4.17166	-2.1243	0.0478003	0.474341	-5.13343	NO
Cntn1	1.8191	-4.04828	1.55981	0.136267	0.661227	-5.13405	NO
Clip1	0.374754	6.47648	2.29015	0.0343437	0.421016	-5.13433	NO
Gm8362	1.409	-2.8597	1.58717	0.129937	0.654604	-5.13588	NO
Sema4f	1.58958	1.49913	1.92353	0.0704252	0.553569	-5.13628	NO
Gm10961	-0.830759	-5.09932	-1.4381	0.167617	0.698371	-5.13635	NO
Celsr3	0.70315	-1.78129	1.63122	0.120268	0.642038	-5.13675	NO
Lrrc39	0.463098	1.60562	1.87439	0.0772505	0.564346	-5.13683	NO
Pcdhb20	0.735889	0.967071	1.86568	0.0785199	0.56797	-5.13781	NO
Wnt3	-1.18554	-4.92464	-1.44221	0.166468	0.6974	-5.13998	NO
Gm9803	0.976032	2.70541	1.98717	0.0623855	0.532889	-5.141	NO
Cdx1	2.27693	-2.49093	1.62483	0.121632	0.643548	-5.14113	NO
Slc13a4	1.40676	-3.89517	1.54075	0.140825	0.666692	-5.14158	NO
Hpse2	0.882166	-4.3623	1.46276	0.160827	0.693207	-5.14164	NO
Rnasel	0.865188	1.63586	1.92681	0.0699885	0.5525	-5.14278	NO
B3gat1	1.54373	-3.47746	1.55841	0.136597	0.661742	-5.14338	NO
Shf	-0.515308	6.44774	-2.29037	0.0343288	0.421016	-5.14412	NO
Tex13c3	1.30544	-4.7457	1.4893	0.153773	0.686127	-5.14449	NO
Abca13	-0.830438	-4.81767	-1.42625	0.170962	0.702532	-5.1461	NO
Rab40b	0.657175	-0.183999	1.76347	0.0948396	0.602258	-5.1467	NO
Suclg1	0.253026	5.70805	2.27841	0.0351674	0.424145	-5.14709	NO
Itpr2	-1.07939	5.59891	-2.23379	0.0384652	0.438498	-5.14776	NO
Mup16	1.12567	-5.13046	1.41471	0.174272	0.705206	-5.14802	NO
Olfr803	-0.774696	-2.64137	-1.54326	0.140218	0.666565	-5.1491	NO
Gm45208	0.963327	-5.27209	1.40407	0.177367	0.707839	-5.14926	NO
Pold4	-0.373994	3.36182	-2.04879	0.0553963	0.512199	-5.14932	NO
Gabrr2	-0.745393	-1.50652	-1.6139	0.123994	0.647846	-5.1501	NO
Arhgef3	0.573162	5.94757	2.28545	0.0346712	0.421016	-5.15068	NO
Dclk3	1.64225	-2.9373	1.59801	0.127498	0.650482	-5.15137	NO
Pacs1	-0.495711	6.87987	-2.31124	0.0329097	0.413219	-5.15152	NO
Vsig4	1.75153	-3.10357	1.57028	0.133814	0.65807	-5.1517	NO
Trim16	0.634176	4.81812	2.23007	0.0387532	0.439139	-5.15266	NO
Oprd1	-1.17718	-2.02393	-1.59427	0.128336	0.650482	-5.15422	NO
Trit1	0.29879	3.60714	2.09433	0.0506939	0.490339	-5.15533	NO
Nlrp9b	-0.950433	-1.35344	-1.60796	0.125295	0.649389	-5.15567	NO
Olfr1555-ps1	0.668791	-1.44459	1.66673	0.112926	0.629613	-5.15585	NO
Pea15a	-0.397332	7.52164	-2.31299	0.0327934	0.413219	-5.15676	NO
Mboat2	-0.436823	4.73332	-2.17665	0.0431054	0.454796	-5.15691	NO
Tex45	1.52003	-3.64332	1.53515	0.142189	0.668004	-5.15724	NO
Pafah1b3	-0.362078	6.44831	-2.30119	0.0335859	0.416747	-5.1575	NO
Pgm3	0.295661	3.54963	2.08738	0.0513878	0.492538	-5.15791	NO
Grm4	-0.842312	-4.9863	-1.41001	0.175633	0.706653	-5.15864	NO
Btg4	0.737412	-5.24801	1.40274	0.177759	0.708397	-5.15899	NO
Ogn	1.65937	1.35131	1.87272	0.0774927	0.564978	-5.1592	NO
Prdm16	1.1758	-0.481446	1.74365	0.0983258	0.608253	-5.15924	NO
Tspyl1	0.306907	5.71168	2.28665	0.0345877	0.421016	-5.1594	NO
Ranbp3l	0.536499	-3.00474	1.54557	0.13966	0.666072	-5.16029	NO
Tg	0.870515	-4.14805	1.50962	0.148546	0.676359	-5.1616	NO
Cavin2	-0.557726	4.33218	-2.02358	0.0581659	0.521797	-5.16291	NO
Plcxd1	1.12164	-3.00424	1.56314	0.135482	0.66052	-5.16348	NO
Gm10226	0.455528	-0.5032	1.71662	0.103259	0.614559	-5.16399	NO
Alox5ap	0.668239	2.82618	2.00077	0.0607781	0.530197	-5.16407	NO
Sepsecs	0.7318	3.41856	2.0784	0.0522966	0.495211	-5.16451	NO
Sytl4	0.892047	0.565694	1.79587	0.0893711	0.593103	-5.16485	NO
Btg1	0.236957	8.302	2.30956	0.0330219	0.413402	-5.16723	NO
Traf5	-0.548487	-2.65974	-1.49017	0.153547	0.686081	-5.16869	NO
Nudcd2	0.331195	4.88526	2.21408	0.0400109	0.443878	-5.16943	NO
Trp53rka	-0.358819	4.27287	-2.14222	0.0461434	0.467321	-5.17081	NO
Emc3	0.197021	6.64516	2.28607	0.0346282	0.421016	-5.17136	NO
Tmc4	-0.383016	6.84278	-2.29527	0.0339904	0.419301	-5.17187	NO
Gpat4	0.295387	7.21846	2.29832	0.0337818	0.417774	-5.17192	NO
Slc10a5	1.00426	-4.02147	1.45594	0.162682	0.695662	-5.17209	NO
Olfr1303	0.847862	-3.67633	1.51	0.14845	0.676239	-5.17222	NO
Cdcp2	1.07303	-2.89563	1.55293	0.137897	0.663781	-5.17259	NO
Spata31d1a	0.452045	-0.179463	1.69881	0.106625	0.619453	-5.17389	NO
Tacr3	1.31494	-3.00625	1.47856	0.156597	0.68901	-5.17405	NO
Cul9	1.15746	1.84376	1.93505	0.0689047	0.552356	-5.17544	NO
Fat1	0.462798	8.31625	2.30934	0.0330363	0.413402	-5.17561	NO
Pnma5	0.769907	-1.73914	1.62104	0.122446	0.645649	-5.17604	NO
Ciz1	-0.475118	6.27119	-2.28473	0.0347214	0.421278	-5.17667	NO
Olfr313	0.923155	-3.31417	1.51841	0.146331	0.674342	-5.17687	NO
Pdzk1ip1	1.62456	1.79248	1.89993	0.0736335	0.559291	-5.17738	NO
Plek	0.421949	4.03988	2.138	0.0465288	0.468333	-5.1777	NO
P2rx6	1.52168	-1.65008	1.61823	0.123054	0.647083	-5.17789	NO
Decr1	0.218308	5.19414	2.23582	0.0383092	0.438498	-5.17907	NO
Grin2c	0.668854	-3.04873	1.42781	0.170518	0.701836	-5.18016	NO
Sprtn	0.268086	5.4383	2.23528	0.0383511	0.438498	-5.18094	NO
Csf2ra	-0.516248	3.76071	-2.07176	0.0529776	0.497869	-5.18151	NO
Olfr463	1.02051	-5.01858	1.42495	0.171332	0.702737	-5.18258	NO
Pwwp3b	1.41606	-3.79781e-05	1.78442	0.091272	0.595896	-5.18271	NO
Cyp4a10	1.01474	-4.65575	1.44051	0.166943	0.6974	-5.18283	NO
Olfr635	0.457874	2.03479	1.92441	0.0703077	0.553569	-5.18337	NO
Cd7	0.63406	-1.10767	1.6624	0.113799	0.632844	-5.18364	NO
Tex2	0.232422	5.33287	2.23671	0.0382414	0.438498	-5.18597	NO
Tmem163	-0.913099	-2.24882	-1.47144	0.158491	0.692186	-5.18634	NO
Trim35	0.626559	5.73164	2.27413	0.0354718	0.4261	-5.1872	NO
Olfr536	0.751518	-1.56146	1.63901	0.118624	0.640471	-5.18811	NO
Vmn1r86	0.473956	0.401226	1.79871	0.0889064	0.592913	-5.18878	NO
Fnip2	0.372236	5.57437	2.23618	0.0382818	0.438498	-5.18933	NO
Stac	1.18248	-5.09087	1.3861	0.182699	0.711037	-5.18993	NO
Bckdk	-0.345447	6.46546	-2.28248	0.0348799	0.422507	-5.19097	NO
Cnep1r1	0.311547	6.04585	2.26839	0.0358838	0.427846	-5.19156	NO
Klk1b27	1.14273	-3.81449	1.44694	0.165156	0.696573	-5.19167	NO
Sgsm3	0.307977	4.35106	2.12989	0.0472781	0.472973	-5.19194	NO
Tph2	1.14322	-4.54278	1.43876	0.167432	0.697798	-5.19215	NO
Rtl1	0.979987	-2.63265	1.54284	0.14032	0.666565	-5.1925	NO
Pacrg	1.14202	-0.179861	1.73594	0.099712	0.60992	-5.19332	NO
Mxi1	-0.271903	6.70261	-2.22211	0.039375	0.443149	-5.19343	NO
Isy1	0.274084	5.34657	2.2386	0.0380968	0.438498	-5.19661	NO
Ovol3	1.11958	-3.2401	1.5242	0.144886	0.672793	-5.1967	NO
Slc22a26	0.538782	-1.52754	1.55996	0.13623	0.661227	-5.19744	NO
Nexn	1.65617	1.0583	1.87518	0.0771364	0.564326	-5.19968	NO
Cmip	0.32378	5.93895	2.2679	0.0359199	0.427846	-5.19974	NO
Igsf5	0.856436	2.93098	1.96181	0.0654856	0.542079	-5.19991	NO
Rnf222	-0.900298	-2.42203	-1.53479	0.142278	0.668004	-5.20003	NO
Mall	0.596068	3.27364	2.04281	0.0560419	0.513985	-5.20012	NO
Rnf185	0.260541	5.24818	2.22265	0.0393318	0.443001	-5.20046	NO
Atp5c1	-0.247418	7.34216	-2.25933	0.0365438	0.431685	-5.20102	NO
Olfr11	1.13461	-2.92779	1.52297	0.145193	0.67347	-5.20106	NO
Gypc	0.967797	1.8792	1.92935	0.069653	0.552356	-5.20107	NO
Tlr12	-1.64737	-1.06117	-1.59314	0.12859	0.650482	-5.20164	NO
Olfr911-ps1	0.931036	-4.79546	1.43301	0.169047	0.699166	-5.20201	NO
Fam90a1a	0.418606	-5.58815	1.30977	0.206792	0.728133	-5.2025	NO
Olfr851	0.62875	-0.214192	1.72991	0.100807	0.611318	-5.20251	NO
Etnppl	0.734068	-2.3551	1.55366	0.137723	0.663532	-5.20263	NO
Pex13	0.265684	4.70298	2.17732	0.0430481	0.454796	-5.20345	NO
Il6	0.543706	-0.856599	1.66034	0.114217	0.633205	-5.20349	NO
Epor	0.732072	1.07126	1.8408	0.082247	0.575478	-5.20424	NO
Themis3	1.64826	-4.49238	1.45208	0.163738	0.696103	-5.20475	NO
Kmo	0.740277	-0.255557	1.72304	0.102068	0.613137	-5.20551	NO
Atp2c1	0.255847	6.70696	2.25295	0.0370157	0.433444	-5.20681	NO
Tiam2	0.534947	3.6412	2.08688	0.0514374	0.492538	-5.20726	NO
Adra1a	1.40925	-1.81051	1.59655	0.127825	0.650482	-5.20737	NO
Ppp1r32	-0.578851	0.266718	-1.71611	0.103354	0.61488	-5.20822	NO
Lat2	0.662795	1.89057	1.89114	0.0748609	0.560515	-5.20894	NO
Tph1	2.45044	-2.70167	1.58478	0.130479	0.655357	-5.21005	NO
Sycp2l	0.507296	-5.4167	1.31038	0.206593	0.728133	-5.21005	NO
Olfr733	0.694602	-2.31106	1.56625	0.134752	0.659369	-5.21197	NO
Spint3	-0.954779	-4.67576	-1.37156	0.187108	0.714775	-5.21261	NO
Erbb4	1.03184	0.905737	1.87076	0.0777773	0.565893	-5.21298	NO
Aldoart1	0.677301	-3.78244	1.44318	0.166199	0.6974	-5.21336	NO
Spag6l	1.9389	-3.31282	1.53967	0.141088	0.6673	-5.21378	NO
Clpx	0.360417	5.45994	2.23122	0.0386641	0.438827	-5.21421	NO
Izumo1r	-0.951319	-2.9876	-1.49958	0.151111	0.682278	-5.21483	NO
Cnksr3	0.428622	4.4984	2.12623	0.0476199	0.474341	-5.21506	NO
Dpep3	-0.990008	-3.56926	-1.4274	0.170635	0.701836	-5.2153	NO
Slamf7	-0.892439	-1.00179	-1.57057	0.133746	0.65807	-5.21602	NO
Ndst4	1.4932	-3.31052	1.47324	0.158009	0.690898	-5.21657	NO
Vmn1r71	-0.622286	-2.54581	-1.46258	0.160874	0.693207	-5.2171	NO
Olfr285	1.00953	-2.19979	1.59846	0.127398	0.650482	-5.21715	NO
Ralgps2	0.481575	4.55402	2.15079	0.0453691	0.463909	-5.21822	NO
Slc9b2	0.529937	0.109736	1.70735	0.104998	0.6172	-5.21834	NO
Gal3st2	-1.54559	-2.47063	-1.42224	0.172105	0.702989	-5.21902	NO
Olfr1192-ps1	-0.592763	-3.12174	-1.49011	0.153562	0.686081	-5.22001	NO
Car14	0.68679	-1.78294	1.56343	0.135414	0.66052	-5.22049	NO
Olfr57	0.459343	0.56955	1.76093	0.0952806	0.602363	-5.22068	NO
Col24a1	1.5161	-0.63036	1.6974	0.106895	0.61953	-5.22292	NO
Zfp385b	1.20419	-1.8993	1.57957	0.131669	0.655505	-5.22329	NO
Lipo4	1.94122	-3.73122	1.49531	0.152213	0.683745	-5.22362	NO
AI854703	0.908079	-1.64376	1.59069	0.129141	0.652315	-5.22443	NO
Rtn4ip1	0.386177	3.28229	2.01708	0.0588993	0.525033	-5.22466	NO
Olfr765	1.40664	-4.15248	1.44092	0.166828	0.6974	-5.22669	NO
Plxna4	1.04137	1.53719	1.86838	0.0781242	0.566314	-5.22749	NO
Olfr517	-0.99115	-4.21141	-1.38517	0.182978	0.711037	-5.22781	NO
Ccnjl	0.840341	1.46827	1.82504	0.0846873	0.583627	-5.23096	NO
Akr1c18	1.63475	-0.196722	1.73178	0.100467	0.610239	-5.23101	NO
Cfl1	-0.35276	9.86349	-2.27255	0.0355851	0.4261	-5.23164	NO
Brd9	-0.353504	5.48016	-2.21105	0.0402538	0.444236	-5.23394	NO
Ttc16	-0.574114	-0.911786	-1.62641	0.121294	0.643279	-5.23491	NO
Psmc3	-0.250869	7.75434	-2.26628	0.036037	0.42844	-5.23524	NO
Lep	2.25202	-3.75368	1.49519	0.152241	0.683745	-5.23549	NO
Pars2	-0.323976	4.02247	-2.07786	0.0523517	0.495211	-5.23794	NO
Dpep2	0.674323	1.48626	1.83961	0.0824287	0.576026	-5.23842	NO
Phtf1	-0.231724	5.69412	-2.22276	0.0393235	0.443001	-5.23879	NO
Mmrn1	1.23972	-3.77678	1.48031	0.156133	0.688195	-5.23954	NO
Gm36079	0.749748	-5.37351	1.31721	0.20434	0.726596	-5.23997	NO
Ppp1r1a	2.17831	-2.53848	1.57146	0.13354	0.65783	-5.24002	NO
Lhx6	0.84705	0.070584	1.73199	0.100429	0.610239	-5.24018	NO
Klf12	0.703314	2.67676	1.95636	0.0661696	0.54493	-5.24036	NO
Slc25a26	0.269303	2.96849	1.95289	0.0666085	0.546411	-5.24102	NO
Olfr457	-0.717799	-1.77463	-1.5489	0.13886	0.664757	-5.24127	NO
Fam217b	0.582345	1.49574	1.84781	0.0811807	0.574388	-5.24322	NO
Slmap	0.427817	7.33152	2.26471	0.0361511	0.428864	-5.2433	NO
Nlrc5	0.789674	4.52728	2.14716	0.0456955	0.465659	-5.24409	NO
Zpbp2	1.16521	-3.46673	1.51406	0.147425	0.675465	-5.24419	NO
Tcp11	1.46803	-1.52757	1.59627	0.127887	0.650482	-5.24438	NO
Slc34a2	1.57922	-0.0503605	1.71863	0.102884	0.613899	-5.24449	NO
Efs	-0.601276	5.17224	-2.1744	0.0432984	0.455373	-5.24452	NO
Zfp677	0.782635	3.1403	2.01295	0.0593703	0.525467	-5.24516	NO
Cdc42bpb	0.357181	6.68279	2.25025	0.0372166	0.434654	-5.24626	NO
Wipi2	-0.178662	7.26382	-2.25549	0.0368274	0.433001	-5.24671	NO
Mpzl1	-0.281997	7.41374	-2.23713	0.0382089	0.438498	-5.24793	NO
Lsm8	0.481712	6.08179	2.24116	0.0379017	0.438258	-5.24837	NO
Ccdc86	-0.390168	4.48958	-2.10422	0.0497225	0.48484	-5.25008	NO
Crx	-0.429465	-0.729745	-1.60659	0.125595	0.649839	-5.25047	NO
[truncated: 12,816 more rows]

## Sheet: Table S6_Comb_Ctrl_DEGs
Genes	LogFC	AveExpr	t	P.Value	Adj.P.Val	B	Significant
[truncated: 250 more rows]
