# Supplementary material for: Genome-Wide Analysis on Transcriptome and Methylome in Prevention of Mammary Tumor Induced by Early Life Combined Botanicals
Source: Cells. 2022 Dec 21;12(1):14. doi: 10.3390/cells12010014 (PMC9818885; doi:10.3390/cells12010014)
Supplement: Supplementary file 1 [file cells-12-00014-s001.zip › Supplementary File 2-Global methylation level changes in BSp, GTPs and Combo treatment.xlsx]

## Sheet: Table S7_Sequence reads
Samples	Raw reads	Mean Phred Score	Reads sent to aligner	Reads Aligned uniquely	Reads not Aligned uniquely	Reads not Aligned
					(in percentage)	(in percentage)
Control
Control 1	36666256	34.1	15742482	69.4	16.2	14.4
Control 2	44958394	34.2	14973061	70.6	15.9	13.5
Control 3	42064649	34.19	25596396	70.2	16.4	13.4
Control 4	39066990	34.18	33257859	71.11	17.51	11.57
Control 5	39929414	33.27	33064007	69.37	17.49	12.98
Control 6	36715584	33.81	31164571	70.83	16.74	13.56
Broccoli Sprouts (BSp)
BSp 1	46929453	33.99	14991277	71.2	16.2	12.6
BSp 2	44703720	34.23	20117695	69.8	15.9	14.3
BSp 3	45595198	34.24	14492238	67.5	15.1	17.4
BSp 4	44783291	34.37	21564397	70.32	16.1	16.83
BSp 5	41023581	34.91	26844243	68.8	17.81	17.11
BSp 6	45907857	33.76	30188374	70.11	16.63	14.29
BSp 7	44232575	34.82	25581929	71.48	16.91	15.87
Green Tea Polyphenols (GTPs)
GTPs 1	43406272	34.31	11170594	67.3	14.4	18.3
GTPs 2	43941421	34.23	16526891	68.7	15.3	16
GTPs 3	52160503	34.26	13115103	68.3	15.4	16.3
Combination (BSp+GTPs)
Combination 1	66513315	34.2	18722650	67.2	15.6	17.2
Combination 2	55414663	34.23	13226016	67.4	15.9	16.7
Combination 3	40362197	34.17	15813250	67.7	16	16.3

## Sheet: Table S8_BSps_DMGs
S.No	Feature name	Genes	Target row	Distance to feature	Feature strand	Chromosome	Start	End	Strand	pvalue	qvalue	Methylation difference
1	NM_001004357	Cntnap2	459	720525	+	6	45780584	45780584	+	3.23688e-14	7.22195e-13	-26.2021
2	NM_001004357	Cntnap2	458	-349755	+	6	44710306	44710306	-	1.11773e-18	4.35484e-17	25.0765
3	NM_001013382	Lrrc52	31	-15673	-	1	167482452	167482452	+	3.41939e-09	3.56169e-08	-28.91
4	NM_001024614	Cfap299	418	19327	+	5	98348629	98348629	-	2.75564e-38	5.17134e-36	-41.6326
5	NM_001024618	Xirp2	302	30740	+	2	67476740	67476740	+	2.59444e-10	3.28604e-09	26.9432
6	NM_001024618	Xirp2	302	30740	+	2	67476740	67476740	+	2.59444e-10	3.28604e-09	26.9432
7	NM_001024618	Xirp2	303	30775	+	2	67476775	67476775	+	2.52931e-25	1.77259e-23	48.2081
8	NM_001024618	Xirp2	303	30775	+	2	67476775	67476775	+	2.52931e-25	1.77259e-23	48.2081
9	NM_001030297	Tmprss11c	414	6514	-	5	86282795	86282795	+	3.40824e-24	2.20553e-22	-28.7892
10	NM_001033041	Acmsd	25	-2629	+	1	127726784	127726784	-	4.96759e-09	5.00904e-08	25.8959
11	NM_001033354	Iqsec3	474	15126	-	6	121458553	121458553	-	1.28246e-17	4.425e-16	-31.1343
12	NM_001033471	Cpxcr1	616	-593950	+	X	115854994	115854994	-	8.89307e-14	1.85893e-12	29.3744
13	NM_001033776	Vrtn	108	2773	+	12	84645667	84645667	-	3.36081e-20	1.55091e-18	-33.5589
14	NM_001033880	4930415L06Rik	610	-193408	-	X	90126259	90126259	+	7.91475e-08	6.3717e-07	26.3721
15	NM_001033960	Rabgap1	298	-548	+	2	37451706	37451706	-	9.15838e-27	7.33094e-25	-25.2348
16	NM_001038609	Mapt	81	19817	+	11	104251251	104251251	-	5.94349e-09	5.88591e-08	-25.7
17	NM_001081212	Irs2	537	-10668	-	8	11019097	11019097	-	2.06441e-38	3.93982e-36	37.0982
18	NM_001081299	Cdh18	170	516131	+	15	23552592	23552592	-	1.58925e-08	1.45132e-07	-25.4386
19	NM_001081641	Pitpnm3	73	-21965	-	11	72157853	72157853	+	1.66977e-18	6.32331e-17	25.9079
20	NM_001115075	H2-M5	237	45	-	17	36989460	36989460	-	2.58808e-08	2.28202e-07	-31.5344
21	NM_001146107	Spopfm2	339	-41463	-	3	94219655	94219655	-	1.7239e-16	5.17624e-15	26.0599
22	NM_001159275	Slc25a2	267	19785	-	18	37618939	37618939	+	1.72046e-20	8.13956e-19	25.961
23	NM_001159331	N6amt1	224	-34565	+	16	87319620	87319620	-	1.62747e-25	1.15252e-23	36.7584
24	NM_001159331	N6amt1	225	-34538	+	16	87319647	87319647	-	2.3809e-14	5.41587e-13	27.8492
25	NM_001163267	Cfap58	288	50176	+	19	47987886	47987886	-	4.21458e-11	6.09185e-10	25.4026
26	NM_001163495	Arhgap19	284	-6526	-	19	41808609	41808609	-	6.49292e-12	1.06521e-10	25.7816
27	NM_001164594	Pdzrn4	190	157658	+	15	92754765	92754765	-	5.0393e-14	1.09189e-12	30.3216
28	NM_001168296	Ephb1	597	-26170	-	9	102380862	102380862	+	1.123e-72	1.08384e-69	26.2893
29	NM_001171011	Slc14a1	276	8257	-	18	78133863	78133863	+	4.91814e-12	8.20813e-11	30.999
30	NM_001177504	Gm6588	423	-19868	+	5	112429558	112429558	-	1.53273e-15	4.07676e-14	-26.2463
31	NM_001199224	Agbl1	522	54000	+	7	76283885	76283885	-	8.74432e-09	8.39622e-08	-26.1967
32	NM_001206661	Tmem200c	245	-226051	+	17	68611085	68611085	-	2.17735e-27	1.86675e-25	28.7931
33	NM_001206661	Tmem200c	246	-49526	+	17	68787610	68787610	+	1.0023e-27	8.81701e-26	-25.5798
34	NM_001242345	Spx	492	19375	+	6	142432804	142432804	+	3.21777e-29	3.08792e-27	-25.9644
35	NM_001256057	Krtap16-1	78	-2487	-	11	99989079	99989079	+	1.76762e-09	1.94683e-08	-25.2039
36	NM_001256259	Samt2b	617	-12722	-	X	154356113	154356113	-	1.35946e-16	4.14458e-15	27.3549
37	NM_001276278	1110025L11Rik	226	-9329	-	16	89073330	89073330	+	1.62056e-40	3.53173e-38	-35.3652
38	NM_001282045	Schip1	337	-1444	+	3	68466739	68466739	-	1.80109e-11	2.75669e-10	25.85
39	NM_001289701	Pde4dip	343	19216	-	3	97869492	97869492	-	1.32498e-10	1.7621e-09	28.3224
40	NM_001302636	Phactr1	129	-78109	+	13	42788138	42788138	-	2.51699e-27	2.14704e-25	33.8552
41	NM_001302676	Lair1	508	-4633	-	7	4067836	4067836	-	1.629e-12	2.89007e-11	30.6838
42	NM_001302676	Lair1	510	-4672	-	7	4067875	4067875	-	3.406e-45	9.75027e-43	57.0629
43	NM_001302676	Lair1	509	-4639	-	7	4067842	4067842	-	5.80879e-22	3.08519e-20	38.3804
44	NM_001305940	Arx	611	-6664	+	X	93279843	93279843	-	3.61127e-27	3.01203e-25	26.0023
45	NM_001308052	Hhipl2	33	11268	+	1	183430514	183430514	+	5.65243e-13	1.07207e-11	-26.2149
46	NM_001310435	Mei1	182	751	+	15	82083225	82083225	+	1.0352e-82	1.52037e-79	26.592
47	NM_001313746	Fundc1	604	839	-	X	17571169	17571169	+	5.25378e-13	1.00266e-11	27.416
48	NM_001317350	Bub3	530	53315	+	7	131613807	131613807	-	1.73012e-57	1.02531e-54	-30.799
49	NM_007539	Bdkrb1	115	1340	+	12	105605429	105605429	+	6.52371e-14	1.38683e-12	26.3507
50	NM_007826	Dach1	158	441718	-	14	97728048	97728048	+	1.51476e-18	5.76865e-17	25.7407
51	NM_007934	Enpep	353	14212	-	3	129318538	129318538	+	1.384e-17	4.7511e-16	-26.1409
52	NM_008024	Foxl1	567	-3200	+	8	121124485	121124485	+	3.17611e-13	6.23039e-12	-28.6935
53	NM_008516	Lrrn1	472	-50840	+	6	107478886	107478886	+	5.74043e-27	4.68379e-25	25.0118
54	NM_008554	Ascl2	535	-554	-	7	142969817	142969817	-	5.73104e-29	5.39253e-27	-41.4894
55	NM_008554	Ascl2	534	2084	-	7	142967181	142967181	-	6.77815e-14	1.43821e-12	-36.0415
56	NM_009063	Rgs5	32	22589	+	1	169678088	169678088	+	1.89592e-08	1.7101e-07	-25.5609
57	NM_009093	Rps29	101	10262	-	12	69148925	69148925	-	7.06703e-17	2.20833e-15	33.4123
58	NM_009227	Snrpe	26	61322	-	1	133548959	133548959	-	1.12212e-16	3.4616e-15	28.2063
59	NM_009401	Tnfrsf8	389	-60157	-	4	145375303	145375303	+	1.17058e-13	2.41844e-12	27.3773
60	NM_009531	Xpc	467	12899	-	6	91502990	91502990	-	2.77893e-19	1.17485e-17	26.8224
61	NM_009690	Cd5l	338	-31564	+	3	87326317	87326317	-	7.47269e-47	2.3591e-44	26.0575
62	NM_009869	Cdh9	169	483263	+	15	17261362	17261362	+	1.32199e-13	2.70643e-12	29.0078
63	NM_010225	Foxf2	127	-2856	+	13	31622960	31622960	+	5.05952e-17	1.61998e-15	-31.3684
64	NM_010281	Ggh	361	73076	+	4	20115126	20115126	+	1.20463e-78	1.50711e-75	34.2966
65	NM_011010	Omp	526	766	-	7	98144682	98144682	-	1.48595e-08	1.36584e-07	-26.3226
66	NM_011084	Pik3c2g	488	13884	+	6	139855327	139855327	+	7.08906e-13	1.32374e-11	-27.094
67	NM_011084	Pik3c2g	487	-95451	+	6	139745994	139745994	+	5.65805e-36	8.93114e-34	-31.7761
68	NM_011202	Ptpn11	428	82225	-	5	121109173	121109173	-	2.28778e-23	1.36779e-21	-36.8187
69	NM_011384	Six6	103	11770	+	12	72951650	72951650	+	2.50133e-07	1.8183e-06	-26.1562
70	NM_011440	Sox14	594	31708	-	9	99844463	99844463	+	7.68489e-13	1.42633e-11	-26.3519
71	NM_011650	Tsn	22	122771	-	1	118188362	118188362	-	3.29958e-15	8.46304e-14	-38.4473
72	NM_011898	Spry4	269	943	-	18	38600326	38600326	-	1.16941e-10	1.56942e-09	-26.7696
73	NM_013712	Itgb1bp2	613	-4460	+	X	101444649	101444649	+	5.34324e-16	1.5142e-14	-38.0518
74	NM_013907	Fbxw4	286	5050	-	19	45655144	45655144	+	9.00622e-07	5.74445e-06	-26.7081
75	NM_013912	Apln	607	1962	-	X	48032891	48032891	-	3.58042e-09	3.72253e-08	-28.4005
76	NM_013932	Ddx25	577	4718	-	9	35553753	35553753	-	1.20088e-105	4.05651e-102	33.2803
77	NM_016789	Nptx2	440	41386	+	5	144587271	144587271	+	1.91519e-13	3.84627e-12	37.1003
78	NM_019459	Nphs1	516	-73	+	7	30459985	30459985	+	4.29167e-51	1.72584e-48	-35.2615
79	NM_019697	Kcnd2	450	-118447	+	6	21097662	21097662	+	1.25635e-21	6.43988e-20	-30.7549
80	NM_019998	Alg2	370	27221	-	4	47447147	47447147	+	1.32308e-09	1.49375e-08	-34.9094
81	NM_020595	Otor	310	16819	+	2	143095309	143095309	-	7.44982e-15	1.82092e-13	-25.7555
82	NM_022415	Ptges	297	28481	-	2	30874817	30874817	-	9.64544e-10	1.10974e-08	28.695
83	NM_024207	Derl1	178	22722	-	15	57869697	57869697	+	5.13226e-17	1.63861e-15	31.9264
84	NM_024209	Ppp6c	299	-149226	-	2	39375563	39375563	-	4.49484e-18	1.62215e-16	-36.564
85	NM_024279	Spaca7	538	3552	+	8	12576599	12576599	+	3.36142e-15	8.61511e-14	26.4151
86	NM_025581	Ska1	275	29607	-	18	74178212	74178212	+	1.75119e-14	4.08525e-13	-25.0068
87	NM_025652	Gtf3a	446	-5338	+	5	146943319	146943319	+	7.00774e-09	6.85146e-08	-30.0314
88	NM_025652	Gtf3a	444	-5384	+	5	146943273	146943273	+	5.20107e-14	1.12334e-12	-29.2456
89	NM_025652	Gtf3a	443	-5407	+	5	146943250	146943250	+	2.38482e-14	5.42113e-13	-28.5121
90	NM_025652	Gtf3a	445	-5373	+	5	146943284	146943284	+	5.55235e-29	5.23899e-27	-43.8778
91	NM_025791	Tmem223	281	-4528	+	19	8766468	8766468	-	1.98628e-07	1.47057e-06	26.3497
92	NM_025964	Mettl21a	14	16452	-	1	64600717	64600717	+	5.04312e-07	3.41118e-06	25.3696
93	NM_026165	Slc25a46	265	-1265	-	18	31611166	31611166	+	7.40346e-24	4.64843e-22	-29.0538
94	NM_026417	Yipf4	253	-14775	+	17	74474718	74474718	-	8.29558e-09	8.01028e-08	-25.8398
95	NM_026552	Arpc4	473	1129	+	6	113379240	113379240	-	5.89734e-23	3.42284e-21	30.2875
96	NM_026743	Tspan11	479	7652	+	6	127895272	127895272	+	3.80237e-11	5.53153e-10	-30.8382
97	NM_026789	Cfap57	379	8750	-	4	118611656	118611656	+	7.90038e-64	5.6781e-61	51.2855
98	NM_026858	Atp23	55	37963	-	10	126863409	126863409	-	4.74866e-14	1.03772e-12	26.8438
99	NM_027452	Lrfn2	239	82945	+	17	49015525	49015525	+	4.42328e-07	3.03014e-06	26.1242
100	NM_027784	5530400C23Rik	480	-29353	+	6	133262863	133262863	-	7.08995e-21	3.43116e-19	28.7181
101	NM_027784	5530400C23Rik	481	2022	+	6	133294236	133294236	+	2.81462e-37	4.85084e-35	29.2943
102	NM_028033	Prr23a3	593	-372	+	9	98864395	98864395	-	2.3049e-15	6.03554e-14	26.2941
103	NM_028296	Car10	75	40774	+	11	93140062	93140062	+	6.89974e-14	1.45851e-12	25.4649
104	NM_028339	Tmx1	102	763	+	12	70453915	70453915	-	9.54311e-11	1.29827e-09	-27.0406
105	NM_028667	D3Ertd751e	332	1181636	+	3	42924252	42924252	-	7.31174e-23	4.2148e-21	-25.8708
106	NM_028667	D3Ertd751e	331	677263	+	3	42419879	42419879	-	5.2111e-08	4.33141e-07	28.3635
107	NM_029655	Snx7	346	76224	-	3	117792713	117792713	-	6.95129e-14	1.46757e-12	-27.0625
108	NM_029848	Hyal4	452	942	+	6	24749307	24749307	-	3.41634e-34	4.74907e-32	39.2987
109	NM_029848	Hyal4	453	970	+	6	24749335	24749335	-	1.34706e-18	5.1767e-17	26.9372
110	NM_030610	Fgf20	545	-7697	-	8	40294649	40294649	+	1.82263e-10	2.36344e-09	31.3654
111	NM_030750	Sgpp1	104	-24315	-	12	75760043	75760043	+	9.04887e-13	1.66213e-11	30.3444
112	NM_032007	Mmp1b	573	-9278	-	9	7397303	7397303	-	2.89319e-15	7.51195e-14	26.6453
113	NM_033586	Pcdhga3	268	452	+	18	37674785	37674785	+	2.17532e-18	8.12847e-17	28.6794
114	NM_053100	Trim8	287	-46937	+	19	46454711	46454711	-	5.92393e-36	9.30732e-34	46.3843
115	NM_053159	Mrpl3	598	-20098	+	9	105033170	105033170	-	8.61018e-38	1.5637e-35	26.8461
116	NM_053205	Taar1	40	-8538	+	10	23911868	23911868	-	4.85484e-07	3.29504e-06	-25.4209
117	NM_080446	Helb	49	51794	-	10	120061172	120061172	-	9.75819e-08	7.72141e-07	25.445
118	NM_080465	Kcnn2	271	29902	+	18	45590054	45590054	+	1.58106e-41	3.68328e-39	27.9096
119	NM_080557	Snx4	201	42986	+	16	33294440	33294440	+	6.53577e-22	3.44961e-20	-31.3309
120	NM_133903	Spon2	404	8651	-	5	33209588	33209588	-	2.93703e-07	2.10101e-06	-26.9011
121	NM_133911	Adgra3	407	24937	-	5	50034060	50034060	-	3.13193e-19	1.30773e-17	31.3957
122	NM_134072	Akr1c14	123	-8348	+	13	4051243	4051243	-	3.70296e-16	1.06545e-14	29.9662
123	NM_134099	Fbxo4	162	172745	-	15	3806829	3806829	+	4.92145e-11	7.0161e-10	-28.9842
124	NM_134114	Sft2d1	234	-2788	+	17	8308315	8308315	+	1.39303e-11	2.17048e-10	-25.597
125	NM_134195	Vmn1r227	236	9083	+	17	20744181	20744181	+	4.26607e-08	3.61258e-07	-26.2691
126	NM_134248	Havcr1	68	6621	+	11	46757787	46757787	+	2.97908e-20	1.38421e-18	-35.1989
127	NM_144518	Bmerb1	198	-20014	+	16	13966623	13966623	+	1.08215e-09	1.23788e-08	-26.4168
128	NM_144831	Dhx8	80	1821	+	11	101734775	101734775	-	1.78648e-12	3.1595e-11	25.4216
129	NM_144863	Wdr36	266	-5353	+	18	32831872	32831872	-	1.00956e-23	6.25734e-22	-28.2363
130	NM_145158	Emilin2	249	33734	-	17	71277232	71277232	-	8.64334e-15	2.09446e-13	-27.795
131	NM_146194	Picalm	525	26797	+	7	90157027	90157027	-	1.05901e-08	9.98123e-08	34.1317
132	NM_148413	Myo3a	293	-26575	+	2	22200928	22200928	+	2.17614e-08	1.94519e-07	27.552
133	NM_153512	Kcng3	257	2318	-	17	83629578	83629578	-	3.91848e-19	1.60442e-17	43.6728
134	NM_153744	Prkag3	15	11753	-	1	74737203	74737203	-	4.06118e-07	2.80771e-06	-29.8716
135	NM_170779	Wwc1	64	39813	-	11	35940277	35940277	-	3.17863e-37	5.45038e-35	-30.1111
136	NM_172586	Zfp322a	125	-26241	-	13	23395448	23395448	-	2.92376e-10	3.66197e-09	30
137	NM_172815	Rspo2	176	61622	-	15	43109197	43109197	+	1.70795e-09	1.88665e-08	-27.8927
138	NM_172885	Tmem132d	433	203262	-	5	128229816	128229816	-	5.66938e-40	1.16066e-37	32.3357
139	NM_172910	Dlgap2	540	83470	+	8	14179343	14179343	-	5.84072e-31	6.4476e-29	-26.6764
140	NM_175138	Dnai1	365	32910	+	4	41602702	41602702	+	6.08144e-11	8.54526e-10	30.4941
141	NM_175642	Adgrb3	2	12782	-	1	25816926	25816926	+	4.07731e-09	4.17995e-08	29.6676
142	NM_175647	Dmrta1	374	1608	+	4	89689804	89689804	-	9.06097e-19	3.55076e-17	28.2818
143	NM_175696	Pianp	476	-1785	+	6	124994935	124994935	+	2.46573e-32	2.98534e-30	-27.2942
144	NM_177354	Vash1	109	-84810	+	12	86593890	86593890	-	5.82583e-06	3.04965e-05	28.7598
145	NM_177355	Plcxd3	163	-126195	+	15	4249296	4249296	+	8.74281e-15	2.11705e-13	33.8447
146	NM_177372	Dna2	45	3605	+	10	62950632	62950632	+	4.36778e-11	6.29981e-10	-37.1486
147	NM_177673	Cep104	396	955	+	4	153976514	153976514	+	1.60273e-90	3.6093e-87	-38.2078
148	NM_177735	Tmem130	441	68405	-	5	144693174	144693174	-	1.15448e-24	7.69185e-23	-28.9029
149	NM_177838	Fam163a	28	773	-	1	156204254	156204254	-	1.25659e-11	1.9697e-10	25.5527
150	NM_178080	Pde4dip	342	-26641	-	3	97794654	97794654	-	7.26925e-16	2.02267e-14	-34.6291
151	NM_178855	Tmprss15	222	-63557	-	16	79154653	79154653	-	1.00539e-08	9.53174e-08	-31.2288
152	NM_181584	Gab3	609	29265	-	X	75055641	75055641	+	1.73657e-08	1.57859e-07	27.5817
153	NM_181584	Gab3	609	29265	-	X	75055641	75055641	+	1.73657e-08	1.57859e-07	27.5817
154	NM_198408	Crhbp	145	2705	-	13	95442127	95442127	+	6.72877e-25	4.58255e-23	-38.1536
155	NM_198627	Vstm2l	315	-32565	+	2	157882088	157882088	+	1.77778e-08	1.61171e-07	25.0615
156	NM_198958	Nox3	232	3016	-	17	3693246	3693246	-	1.80765e-25	1.27477e-23	-28.2219
157	NM_201396	Sall4	320	-28604	-	2	168795804	168795804	-	5.51078e-09	5.49444e-08	26.9124
158	NM_201638	Mettl14	350	22714	-	3	123363277	123363277	-	9.10478e-17	2.8242e-15	-29.2659
159	NM_207233	C1ql2	23	31206	+	1	120371786	120371786	+	9.9781e-22	5.14307e-20	-26.5352
160	NM_207683	Pik3c2g	486	105492	+	6	139719562	139719562	+	3.23263e-44	8.80618e-42	-27.1658
161	NM_207693	Olfr322	70	-3637	+	11	58661924	58661924	+	1.43617e-14	3.39015e-13	25.1966

## Sheet: Table_S9_GTP_DMG
S.No	Feature name	Genes	Target row	Distance to feature	Feature strand	Chromosome	Start	End	Strand	P-Value	q-value	Methylation difference
138	NM_001081325	Sult2a6	3569	-74623	-	7	14329492	14329492	-	1.26439e-18	3.86949e-17	-29.3691
1112	NM_146174	Tcaf2	3298	-2862	-	6	42647902	42647902	-	3.95273e-07	2.32516e-06	-29.3651
1094	NM_144955	Nkx6-1	3065	-7495	-	5	101672205	101672205	-	2.56421e-12	3.7438e-11	-29.2128
381	NM_001300957	Vgll2	359	-1528	+	10	52020974	52020974	-	1.94723e-05	7.75323e-05	-29.1564
1236	NM_177115	Marchf3	1989	61031	-	18	56864518	56864518	+	7.99543e-07	4.40794e-06	-29.1325
850	NM_025957	Ceacam14	3575	-42586	+	7	17770096	17770096	-	3.82204e-09	3.33384e-08	-29.1117
589	NM_010140	Epha3	1609	-5233	-	16	63869389	63869389	+	2.53776e-12	3.70733e-11	-29.1105
1182	NM_172890	Slc6a11	3396	27172	+	6	114158411	114158411	-	1.72062e-18	5.19619e-17	-29.1049
1117	NM_146456	Olfr92	1764	3279	-	17	37108702	37108702	-	2.03212e-14	3.92629e-13	-29.0989
1273	NM_178652	Supt3	1778	-15988	+	17	44761183	44761183	+	5.71043e-08	3.99812e-07	-29.084
907	NM_027022	Cmtm2a	3976	625	-	8	104292557	104292557	-	7.02775e-08	4.84028e-07	-29.0737
265	NM_001168600	Gnl3l	4359	51104	-	X	150966190	150966190	+	3.2959e-08	2.41329e-07	-29.073
327	NM_001281845	Anxa8	1117	-3358	+	14	34082621	34082621	+	1.37068e-10	1.54416e-09	-29.0535
858	NM_026106	Dr1	3084	-64374	+	5	108204523	108204523	-	3.01517e-32	2.7989e-30	-29.0459
681	NM_011803	Klf6	889	10133	+	13	5871620	5871620	+	3.72618e-09	3.25756e-08	-29.0305
72	NM_001033539	Bex6	1559	-1096	+	16	32178704	32178704	-	3.24748e-05	0.000121832	-29.0191
287	NM_001198570	Abi2	84	10243	+	1	60419860	60419860	-	1.88974e-05	7.55362e-05	-29.0144
199	NM_001114153	Rhox2g	4251	2573	-	X	37640898	37640898	+	5.75117e-09	4.84438e-08	-29.0043
984	NM_029911	Kcnk10	843	-24492	-	12	98602704	98602704	-	5.75094e-11	6.85323e-10	-29.0029
515	NM_008783	Pbx1	248	188163	-	1	168244007	168244007	+	5.45469e-05	0.000192507	-28.9947
13	NM_001007576	Gucy2f	4354	16838	-	X	142180099	142180099	-	4.10075e-07	2.40604e-06	-28.992
548	NM_009290	Wnt8a	1940	7468	+	18	34549794	34549794	-	1.70913e-07	1.0856e-06	-28.9579
459	NM_007994	Fbp2	1006	27448	-	13	62830923	62830923	-	1.57301e-06	8.10711e-06	-28.9474
899	NM_026856	Zfp644	3080	-14357	-	5	106711186	106711186	+	1.80612e-05	7.25914e-05	-28.9474
1186	NM_173030	Galnt13	2255	35110	+	2	54471495	54471495	-	1.34849e-06	7.04306e-06	-28.929
605	NM_010343	Gpx5	907	17894	-	13	21274793	21274793	+	1.13212e-06	6.02707e-06	-28.9242
1114	NM_146399	Olfr1328	2824	-9179	-	4	118944018	118944018	+	6.49943e-13	1.03039e-11	-28.9005
932	NM_028235	Ttc30b	2285	7	-	2	75938456	75938456	+	6.63882e-15	1.35833e-13	-28.8889
687	NM_011856	Tenm2	548	1817	-	11	36942425	36942425	+	9.59784e-15	1.92004e-13	-28.8795
1320	NM_207201	Olfr8	401	-17333	+	10	78937874	78937874	+	2.81489e-11	3.5012e-10	-28.869
1050	NM_133821	Phlpp1	145	38790	+	1	106210657	106210657	-	3.5402e-06	1.68495e-05	-28.8651
1000	NM_031165	Hspa8	4096	-2626	+	9	40798647	40798647	-	2.08607e-06	1.04547e-05	-28.8588
489	NM_008452	Klf2	3921	27880	+	8	72346940	72346940	+	6.13265e-06	2.75391e-05	-28.8462
1051	NM_134013	Psme4	536	13670	+	11	30785443	30785443	+	2.44305e-07	1.49952e-06	-28.8436
851	NM_025964	Mettl21a	91	1211	-	1	64615958	64615958	-	4.59199e-13	7.47682e-12	-28.836
10	NM_001005423	Mreg	98	-5815	-	1	72218121	72218121	+	7.03618e-15	1.43497e-13	-28.8309
730	NM_016789	Nptx2	3213	11324	+	5	144557209	144557209	+	4.64434e-07	2.69295e-06	-28.805
127	NM_001081178	Adgrf5	1772	2518	+	17	43391982	43391982	-	1.39261e-07	9.02211e-07	-28.8004
323	NM_001278258	Prn	2354	8127	+	2	131918053	131918053	-	2.40676e-05	9.34477e-05	-28.7759
519	NM_008842	Pim1	1721	4630	+	17	29495673	29495673	-	2.6222e-16	6.33359e-15	-28.7654
499	NM_008564	Mcm2	3373	2905	-	6	88895876	88895876	+	9.08098e-64	4.00776e-61	-28.7646
913	NM_027491	Rragd	2701	-1339	+	4	32981659	32981659	-	1.00745e-07	6.71706e-07	-28.7574
801	NM_022018	Niban1	207	-316	+	1	151571057	151571057	-	2.46595e-07	1.51247e-06	-28.7537
646	NM_011037	Pax2	2155	15273	+	19	44772665	44772665	-	2.62853e-17	7.01207e-16	-28.7452
511	NM_008744	Ntn1	604	2486	-	11	68384341	68384341	+	1.37097e-05	5.67241e-05	-28.7327
980	NM_029643	Slc52a2	1359	3726	+	15	76542667	76542667	-	2.71933e-06	1.33141e-05	-28.7018
747	NM_018804	Syt11	2558	6087	-	3	88766513	88766513	+	1.05394e-10	1.20652e-09	-28.7016
607	NM_010391	H2-Q10	1754	16754	+	17	35486841	35486841	+	1.54331e-08	1.19937e-07	-28.6976
721	NM_015775	Tmprss2	1662	-600	-	16	97611794	97611794	+	4.93756e-29	3.65862e-27	-28.6813
1239	NM_177164	Vwc2l	95	66356	+	1	70792069	70792069	-	2.90206e-08	2.15194e-07	-28.6549
217	NM_001145637	Armh1	2815	22592	-	4	117229326	117229326	-	1.12399e-15	2.50668e-14	-28.6529
1179	NM_172868	Pakap	2747	-13518	+	4	57554730	57554730	+	1.26556e-06	6.65483e-06	-28.6383
909	NM_027306	Zdhhc25	1403	-7081	+	15	88593221	88593221	+	8.79072e-11	1.02285e-09	-28.634
1250	NM_177612	Ctnna3	378	-5002	+	10	63425096	63425096	+	4.93422e-12	6.90548e-11	-28.634
447	NM_007831	Dcc	2030	436671	-	18	71914399	71914399	+	2.91679e-38	3.85172e-36	-28.6234
639	NM_010895	Neurod2	682	3184	-	11	98326462	98326462	-	4.50847e-29	3.36047e-27	-28.6229
408	NM_001311108	Tmcc2	177	10446	-	1	132357503	132357503	+	2.48292e-05	9.61156e-05	-28.6078
148	NM_001081664	Fads2b	2299	22940	-	2	85495996	85495996	-	2.61927e-06	1.28844e-05	-28.561
1022	NM_033652	Lmx1a	247	314405	+	1	168003961	168003961	+	0.000168786	0.000518408	-28.5538
145	NM_001081473	Zxdb	4301	-21459	+	X	94703110	94703110	-	1.11082e-05	4.6849e-05	-28.55
291	NM_001199235	Sptbn4	3588	14420	-	7	27380087	27380087	+	1.15679e-08	9.19444e-08	-28.5401
823	NM_023746	Prl5a1	917	22181	+	13	28164663	28164663	+	1.3168e-10	1.48812e-09	-28.5338
427	NM_007423	Afp	3040	2037	+	5	90492749	90492749	+	4.30499e-12	6.08766e-11	-28.5317
121	NM_001081105	Rhoh	2996	20835	+	5	65884402	65884402	+	4.19867e-11	5.09638e-10	-28.5248
897	NM_026838	Srpx2	4347	274	+	X	133908697	133908697	+	3.34359e-14	6.26298e-13	-28.5177
1005	NM_031396	Cnnm1	2153	31533	+	19	43471967	43471967	+	2.78475e-10	2.98354e-09	-28.502
550	NM_009313	Tacr1	3353	15985	+	6	82418458	82418458	-	2.58856e-06	1.2747e-05	-28.4946
947	NM_028854	Tbc1d21	4131	28457	-	9	58341913	58341913	+	0.00041376	0.0011326	-28.4615
992	NM_030166	Galnt15	1108	9233	+	14	32038334	32038334	+	1.13192e-06	6.02704e-06	-28.4461
123	NM_001081133	Kif16b	2364	671006	-	2	142230459	142230459	+	7.85901e-05	0.000265106	-28.4314
461	NM_008024	Foxl1	4039	-3200	+	8	121124485	121124485	+	2.78978e-10	2.98767e-09	-28.4295
900	NM_026866	Disp1	285	10464	-	1	183211066	183211066	+	6.49399e-13	1.03036e-11	-28.4015
575	NM_009822	Runx1t1	2680	24053	+	4	13808833	13808833	-	1.2928e-06	6.78813e-06	-28.4003
1198	NM_173451	Arsj	2615	649	+	3	126364499	126364499	-	5.33669e-12	7.41716e-11	-28.3986
671	NM_011528	Taldo1	3788	-817	+	7	141391343	141391343	-	8.63211e-05	0.000288381	-28.3974
156	NM_001085525	Fthl17-ps1	4224	5322	-	X	8971238	8971238	+	3.64881e-11	4.46341e-10	-28.3959
157	NM_001085525	Fthl17c	4224	5322	-	X	8971238	8971238	+	3.64881e-11	4.46341e-10	-28.3959
249	NM_001163640	Chn2	3314	-16072	+	6	54023860	54023860	-	2.18712e-09	1.99817e-08	-28.3946
207	NM_001126491	Gm14459	4223	17004	-	X	8507951	8507951	+	1.46236e-13	2.53706e-12	-28.3797
368	NM_001290814	Aff3	44	11462	-	1	38615783	38615783	+	2.9742e-17	7.88402e-16	-28.3788
868	NM_026369	Arpc5	210	8456	+	1	152774996	152774996	+	8.31551e-05	0.000278915	-28.3745
997	NM_030614	Fgf16	4323	9285	+	X	105773760	105773760	+	2.49341e-12	3.64571e-11	-28.3739
1208	NM_175121	Slc38a2	1447	8483	-	15	96691216	96691216	-	1.43381e-08	1.12155e-07	-28.3531
288	NM_001198765	Postn	2527	32198	+	3	54393303	54393303	+	1.70055e-07	1.08083e-06	-28.352
1003	NM_031261	Fthl17e	4225	-4880	+	X	9028606	9028606	+	1.30856e-11	1.72257e-10	-28.3284
293	NM_001199270	Aldoart1	2759	130423	-	4	72722212	72722212	+	4.90928e-13	7.9497e-12	-28.3245
4	NM_001004194	Nlrp4e	3580	28880	+	7	23330070	23330070	+	1.89399e-05	7.56759e-05	-28.3097
432	NM_007494	Ass1	2228	-26744	+	2	31443526	31443526	-	2.81126e-09	2.51495e-08	-28.301
203	NM_001115075	H2-M5	1761	72	-	17	36989433	36989433	-	7.12298e-05	0.000243229	-28.2915
1153	NM_171824	Pgbd5	4047	70291	-	8	124363646	124363646	-	1.65793e-19	5.53146e-18	-28.2693
787	NM_021350	Chml	264	20510	-	1	175667844	175667844	-	3.26342e-05	0.000122338	-28.267
1065	NM_134471	Kif2c	2814	-26509	-	4	117209132	117209132	+	7.25251e-09	5.98574e-08	-28.2238
1254	NM_177698	Psd3	3914	-1713	-	8	67976286	67976286	-	4.6246e-09	3.97055e-08	-28.2157
172	NM_001102414	Slc2a9	2973	18322	-	5	38461985	38461985	-	3.97469e-09	3.4562e-08	-28.213
928	NM_028176	Cda	2871	9886	-	4	138358070	138358070	-	4.66077e-11	5.61798e-10	-28.2121
1104	NM_145570	Eva1a	3350	9408	+	6	82051034	82051034	+	3.07994e-07	1.85558e-06	-28.2051
1142	NM_153395	Mon2	479	-13427	-	10	123089931	123089931	+	1.59465e-23	7.6702e-22	-28.1805
968	NM_029297	Dynlrb2	4010	-48424	+	8	116456591	116456591	-	1.21926e-11	1.61347e-10	-28.1403
328	NM_001285459	Fmn1	2326	84120	+	2	113525182	113525182	-	2.72587e-05	0.000104444	-28.1379
413	NM_001316680	Ptpre	3770	3093	+	7	135596572	135596572	+	2.3736e-09	2.15407e-08	-28.0848
582	NM_009930	Col3a1	65	22042	+	1	45333578	45333578	+	2.18016e-09	1.99269e-08	-28.0827
776	NM_019867	Ngef	119	5049	-	1	87505314	87505314	-	3.53754e-07	2.10381e-06	-28.08
1297	NM_197959	Kif18b	696	5954	-	11	102919171	102919171	-	4.49027e-05	0.000162296	-28.027
844	NM_025752	4933411K16Rik	2149	11844	+	19	42064070	42064070	-	4.73031e-06	2.18795e-05	-28.0139
701	NM_013712	Itgb1bp2	4308	-4402	+	X	101444707	101444707	+	2.24126e-07	1.38731e-06	-28.0108
394	NM_001308506	Nnt	1081	176612	-	13	119232646	119232646	+	1.68866e-12	2.52934e-11	-28.0105
481	NM_008227	Hcn3	2560	5473	-	3	89154685	89154685	+	1.46828e-20	5.37645e-19	-28.0103
418	NM_001320258	Mmp25	1701	-566	-	17	23645834	23645834	+	2.96246e-25	1.64876e-23	-27.9974
587	NM_010133	En1	164	-1352	+	1	120601135	120601135	-	3.33943e-08	2.43995e-07	-27.9853
1300	NM_198295	Tmx3	2085	-178177	+	18	90331977	90331977	-	2.71996e-12	3.95398e-11	-27.9785
1248	NM_177582	Mlxip	3145	-18786	+	5	123376012	123376012	-	2.40709e-53	7.25186e-51	-27.9727
428	NM_007426	Angpt2	3832	-22516	-	8	18764077	18764077	+	1.04679e-06	5.61473e-06	-27.9694
697	NM_013605	Muc1	2561	7934	+	3	89236988	89236988	-	1.58757e-06	8.1763e-06	-27.9207
1076	NM_138751	Tmem47	4290	-9529	+	X	81061115	81061115	+	1.26825e-06	6.66685e-06	-27.9016
306	NM_001252547	Sh2d3c	2231	-1158	+	2	32726531	32726531	+	5.95074e-14	1.08202e-12	-27.8945
916	NM_027562	Clec2g	3456	-8757	+	6	128925624	128925624	-	3.6348e-06	1.72638e-05	-27.8846
774	NM_019810	Slc5a1	2958	37408	+	5	33141625	33141625	-	2.06931e-09	1.89881e-08	-27.865
371	NM_001291055	Lgals8	900	18344	-	13	12440973	12440973	-	9.90448e-08	6.616e-07	-27.8643
762	NM_019573	Wwox	4002	9255	+	8	114448905	114448905	-	5.4965e-08	3.85855e-07	-27.8541
303	NM_001244692	St18	5	29819	+	1	6517048	6517048	-	6.75207e-14	1.21869e-12	-27.8481
126	NM_001081137	Sis	2539	868564	-	3	72098303	72098303	+	2.2032e-14	4.23731e-13	-27.8219
405	NM_001310762	Tenm4	3705	-74870	+	7	96096374	96096374	+	1.99559e-12	2.95991e-11	-27.8102
1108	NM_145746	Odf4	606	9316	-	11	68917766	68917766	-	3.43864e-11	4.22275e-10	-27.8061
376	NM_001293559	Cox4i1	4038	2643	+	8	120670961	120670961	-	8.30988e-08	5.6417e-07	-27.8045
1232	NM_176920	Lrtm1	1103	-9	+	14	29018199	29018199	+	1.62327e-60	6.38052e-58	-27.7929
490	NM_008463	Klra5	3457	-16356	-	6	129929579	129929579	-	9.04323e-08	6.09003e-07	-27.7848
401	NM_001310536	Rapgef2	2547	52969	-	3	79091919	79091919	-	1.65853e-17	4.51539e-16	-27.7755
34	NM_001018019	Grxcr1	3000	229216	+	5	68261049	68261049	+	1.25487e-09	1.19281e-08	-27.7426
1093	NM_144955	Nkx6-1	3066	-7520	-	5	101672230	101672230	-	9.09653e-07	4.94722e-06	-27.7217
468	NM_008082	Galr1	2066	117442	-	18	82289336	82289336	+	3.89927e-05	0.000143188	-27.7183
937	NM_028547	Kif2b	653	-32964	-	11	91610518	91610518	+	5.72823e-11	6.82778e-10	-27.715
221	NM_001145859	Sh3bp2	2963	-921	+	5	34548655	34548655	+	6.88175e-06	3.05162e-05	-27.7093
130	NM_001081211	Ptafr	2854	-1151	+	4	132562916	132562916	-	6.53876e-11	7.73707e-10	-27.6821
948	NM_028883	Meak7	4035	-25273	-	8	119803688	119803688	-	1.29404e-22	5.81306e-21	-27.6761
838	NM_025624	Pomp	3224	2008	+	5	147862634	147862634	-	1.70831e-07	1.08522e-06	-27.6626
604	NM_010330	Emb	1078	-23341	+	13	117197232	117197232	-	7.89055e-10	7.75375e-09	-27.6552
903	NM_026914	Smdt1	1386	1773	+	15	82347817	82347817	-	1.90966e-08	1.45995e-07	-27.6547
289	NM_001199224	Agbl1	3677	54000	+	7	76283885	76283885	-	8.51064e-07	4.66489e-06	-27.6361
301	NM_001244651	Esp15	1765	-51374	+	17	39589583	39589583	-	0.000301893	0.000861833	-27.631
497	NM_008554	Ascl2	3791	2084	-	7	142967181	142967181	-	1.19884e-06	6.34374e-06	-27.6304
655	NM_011240	Ranbp2	367	-12895	+	10	58433957	58433957	-	1.21216e-09	1.1557e-08	-27.6298
177	NM_001104570	Vmn2r108	1692	-9706	-	17	20490941	20490941	+	5.45307e-07	3.11486e-06	-27.6297
1312	NM_206534	Churc1	808	3188	+	12	76768759	76768759	-	1.33681e-07	8.68854e-07	-27.6287
855	NM_026094	Atp8b3	405	20312	-	10	80518813	80518813	+	0.00032154	0.000909407	-27.5923
393	NM_001308466	Smim4	1107	9059	-	14	31119872	31119872	+	0.00012602	0.000401162	-27.5794
297	NM_001204371	Oprk1	4	64667	+	1	5653158	5653158	-	2.53937e-09	2.2921e-08	-27.5714
273	NM_001177408	Gm15319	3835	9458	-	8	20353745	20353745	+	2.05625e-05	8.13642e-05	-27.5658
422	NM_007390	Chrna7	3659	-32926	-	7	63245451	63245451	-	7.59638e-11	8.91721e-10	-27.5624
12	NM_001005846	Mcoln2	2654	11074	+	3	146161246	146161246	-	1.61619e-12	2.4244e-11	-27.5571
1227	NM_175631	Cbln4	2460	-4038	-	2	172047503	172047503	+	1.87818e-05	7.51576e-05	-27.551
426	NM_007423	Afp	3039	1977	+	5	90492689	90492689	+	3.42266e-10	3.60557e-09	-27.5263
729	NM_016764	Prdx4	4367	33059	-	X	155305402	155305402	+	2.46672e-11	3.10266e-10	-27.5261
146	NM_001081477	Brwd3	4327	296349	-	X	108538007	108538007	+	2.85634e-152	9.58059e-149	-27.5147
679	NM_011657	Tulp3	3454	15594	-	6	128340258	128340258	+	2.8309e-12	4.10695e-11	-27.5118
1026	NM_053105	Klhl1	1196	-96142	-	14	96615175	96615175	+	1.31741e-06	6.90005e-06	-27.5048
539	NM_009182	St8sia3	2003	-117013	+	18	64137346	64137346	-	1.73273e-07	1.0992e-06	-27.4902
260	NM_001166718	Vmn1r173	3581	-7629	+	7	23694713	23694713	+	0.000736356	0.00187252	-27.488
1289	NM_182808	Tafa1	3384	-33384	+	6	96079770	96079770	-	1.29381e-08	1.01965e-07	-27.4837
67	NM_001033410	Rnf224	2211	-220	-	2	25237006	25237006	-	1.47697e-11	1.92862e-10	-27.4832
456	NM_007965	Evl	869	-34671	+	12	108520049	108520049	-	4.15965e-08	2.99402e-07	-27.4822
236	NM_001162955	Gpr15	1598	18336	-	16	58700389	58700389	-	2.53217e-08	1.89413e-07	-27.4733
304	NM_001252200	Map4k4	50	34092	+	1	39935003	39935003	-	1.34264e-08	1.05598e-07	-27.4692
585	NM_010104	Edn1	944	-22071	+	13	42279405	42279405	+	1.85474e-09	1.71285e-08	-27.4353
785	NM_021297	Tlr4	2756	-144837	+	4	66682714	66682714	-	9.03636e-11	1.04853e-09	-27.4326
1286	NM_181584	Gm38425	4283	8504	-	X	75076402	75076402	-	2.91816e-07	1.76742e-06	-27.4299
1287	NM_181584	Gab3	4283	8504	-	X	75076402	75076402	-	2.91816e-07	1.76742e-06	-27.4299
262	NM_001167921	Gtf2e2	3872	-10243	+	8	33721671	33721671	-	4.08968e-14	7.58706e-13	-27.4276
437	NM_007567	Bsn	4185	10177	-	9	108180207	108180207	-	4.58303e-12	6.45349e-11	-27.4133
1245	NM_177470	Acaa2	2036	58278	+	18	74837488	74837488	-	9.0475e-07	4.92322e-06	-27.3993
675	NM_011608	Tnfrsf17	1513	3721	+	16	11317528	11317528	-	1.33419e-05	5.53389e-05	-27.3939
1126	NM_146949	Olfr339	2241	14851	+	2	36436249	36436249	-	0.00018062	0.000549919	-27.3853
1048	NM_133365	Dnah5	1293	-1615	+	15	28202151	28202151	-	2.72739e-05	0.000104494	-27.381
402	NM_001310652	Cldn34c2	4337	-209732	+	X	122893791	122893791	-	0.000222348	0.00066034	-27.3776
403	NM_001310652	Cldn34c1	4337	-209732	+	X	122893791	122893791	-	0.000222348	0.00066034	-27.3776
821	NM_023502	Elf2	2520	13009	-	3	51327636	51327636	+	3.21127e-24	1.64027e-22	-27.3658
693	NM_011935	Esrrg	294	-59301	+	1	187938526	187938526	-	1.76114e-05	7.0948e-05	-27.3443
924	NM_027992	Tmem106b	3243	64641	+	6	13134398	13134398	-	9.88109e-07	5.33012e-06	-27.3299
1041	NM_130796	Snx18	1074	6168	-	13	113612397	113612397	+	5.50259e-07	3.14029e-06	-27.3297
1316	NM_207010	Mdga2	786	-562992	-	12	67785540	67785540	-	3.36768e-11	4.14167e-10	-27.3228
471	NM_008105	Gcnt2	941	269	+	13	40887025	40887025	+	2.4922e-14	4.75496e-13	-27.3109
404	NM_001310681	Hax1	2565	1604	-	3	89996500	89996500	+	4.37892e-08	3.13825e-07	-27.3061
416	NM_001317350	Bub3	3759	2986	+	7	131563478	131563478	+	8.68628e-07	4.7472e-06	-27.2956
864	NM_026286	Ftmt	1971	-154868	+	18	52176668	52176668	+	1.82086e-08	1.3978e-07	-27.2727
336	NM_001286857	Gpatch4	2557	5765	+	3	88048869	88048869	-	3.97271e-17	1.0367e-15	-27.2608
19	NM_001011780	Olfr287	1460	-5126	-	15	98226181	98226181	-	4.28387e-10	4.42569e-09	-27.2499
398	NM_001310461	Cypt1	4241	-384923	+	X	16137946	16137946	+	1.72084e-13	2.96099e-12	-27.2493
1130	NM_147036	Olfr283	1461	-2369	-	15	98381476	98381476	-	2.02446e-05	8.0239e-05	-27.2459
1274	NM_178676	Entpd3	4213	-20245	+	9	120519573	120519573	-	8.12354e-33	7.78503e-31	-27.2429
1174	NM_172815	Rspo2	1308	22053	-	15	43148766	43148766	+	0.00020789	0.000622364	-27.224
588	NM_010139	Epha2	2878	-5644	+	4	141295577	141295577	-	3.28253e-06	1.57272e-05	-27.2188
1233	NM_176963	Galm	1855	34221	+	17	80161690	80161690	-	1.71407e-06	8.75786e-06	-27.2166
57	NM_001033306	Shb	2722	-15315	-	4	45546142	45546142	-	6.39895e-10	6.41934e-09	-27.2156
321	NM_001277230	Zbtb24	342	-670	+	10	41449688	41449688	+	1.65481e-05	6.70779e-05	-27.2083
615	NM_010613	Khsrp	1806	9271	-	17	57022237	57022237	+	2.18611e-43	3.81904e-41	-27.2074
190	NM_001112798	Slc8a1	1864	-62473	-	17	81800859	81800859	-	2.52985e-16	6.11935e-15	-27.1995
824	NM_023842	Dsp	936	20567	+	13	38171859	38171859	+	0.000138196	0.000434431	-27.1954
660	NM_011348	Sema3e	2940	145290	+	5	14170564	14170564	-	6.83172e-13	1.07851e-11	-27.1855
167	NM_001100444	Gm5934	4245	100095	-	X	24399069	24399069	-	8.48672e-09	6.90693e-08	-27.1848
898	NM_026841	Prr32	4257	-80717	+	X	45010187	45010187	-	7.75113e-10	7.62718e-09	-27.1841
816	NM_023239	Nsmce3	3661	145597	-	7	64727444	64727444	-	3.94921e-11	4.81099e-10	-27.182
1252	NM_177669	Skint11	2808	-24993	+	4	114138391	114138391	+	6.80968e-06	3.02393e-05	-27.1744
889	NM_026763	Col6a4	4179	31925	-	9	106064767	106064767	-	2.09729e-08	1.59058e-07	-27.1726
434	NM_007534	Bcl2a1b	4157	-6897	+	9	89192376	89192376	+	2.09999e-10	2.29238e-09	-27.166
566	NM_009656	Aldh2	3140	1191	-	5	121592634	121592634	+	2.4951e-07	1.52793e-06	-27.1207
1251	NM_177640	D030056L22Rik	2103	2997	+	19	18716231	18716231	-	7.03821e-24	3.47506e-22	-27.1178
132	NM_001081235	Mn1	3091	-22536	+	5	111395630	111395630	+	6.82441e-22	2.83997e-20	-27.0994
1063	NM_134436	Vmn1r27	3319	54315	-	6	58161703	58161703	-	4.49192e-14	8.29658e-13	-27.0981
175	NM_001102670	Kbtbd8	3382	-1110	+	6	95116770	95116770	+	2.09151e-08	1.58761e-07	-27.0953
271	NM_001172207	Lrtm2	3422	7340	-	6	119321865	119321865	-	4.23142e-10	4.3769e-09	-27.0813
830	NM_024230	Smtnl1	2296	7780	-	2	84814873	84814873	+	1.8098e-05	7.27164e-05	-27.0752
346	NM_001289684	Jade3	4242	20782	+	X	20446468	20446468	-	3.86998e-07	2.27995e-06	-27.0748
1070	NM_138597	Atp5o	1643	40249	-	16	91891382	91891382	-	7.46613e-09	6.1429e-08	-27.0667
201	NM_001115075	H2-M5	1762	70	-	17	36989435	36989435	-	0.000155591	0.000482833	-27.0646
324	NM_001278584	Pomc	736	-11992	+	12	3942953	3942953	-	1.60838e-07	1.02744e-06	-27.0542
88	NM_001038676	Obox7	3570	290845	+	7	14950551	14950551	-	5.59801e-13	8.96971e-12	-27.0512
648	NM_011084	Pik3c2g	3495	13884	+	6	139855327	139855327	+	5.58823e-06	2.53454e-05	-27.0359
705	NM_013733	Chaf1a	1804	11201	+	17	56051615	56051615	+	7.56394e-07	4.19581e-06	-27.0329
1116	NM_146438	Olfr938	4092	-7866	-	9	39086608	39086608	+	2.94839e-10	3.14481e-09	-27.0218
792	NM_021456	Ces1g	3961	8699	-	8	93328511	93328511	+	0.000154563	0.000480224	-27.013
214	NM_001145015	Arhgap40	2400	24666	+	2	158537460	158537460	-	1.40182e-07	9.07706e-07	-26.9866
590	NM_010143	Ephb3	1538	-2617	+	16	21202178	21202178	-	7.25177e-08	4.98638e-07	-26.9702
219	NM_001145807	Brinp3	205	468849	+	1	146966534	146966534	+	1.57702e-28	1.13648e-26	-26.9554
665	NM_011437	Sox10	1371	236	-	15	79164255	79164255	-	2.395e-05	9.30343e-05	-26.9535
1054	NM_134112	Kctd1	1907	-24532	-	18	15175977	15175977	+	5.36345e-11	6.41121e-10	-26.9197
212	NM_001143802	Insyn2a	3768	-78746	-	7	135017175	135017175	-	0.000343604	0.000964815	-26.9192
463	NM_008032	Aff2	4278	-230085	+	X	69130246	69130246	-	4.74555e-08	3.37565e-07	-26.9075
606	NM_010388	H2-DMb2	1747	-7115	+	17	34138301	34138301	-	7.87264e-08	5.37583e-07	-26.9037
1199	NM_173744	Tdrp	3823	4447	-	8	13970331	13970331	+	6.96134e-08	4.79717e-07	-26.9023
853	NM_026062	Dipk1a	3082	-1344	-	5	107988420	107988420	-	4.68312e-91	4.44564e-88	-26.8898
846	NM_025831	Pxdc1	930	5324	-	13	34647358	34647358	+	7.05735e-06	3.11849e-05	-26.8738
930	NM_028224	Faim2	1472	18210	-	15	99509956	99509956	-	0.000593983	0.00155382	-26.8721
724	NM_015820	Hs6st3	1239	31765	+	14	119170028	119170028	-	1.70341e-09	1.58094e-08	-26.8687
562	NM_009557	Zfp46	2865	10208	+	4	136296275	136296275	-	0.000159182	0.000492667	-26.8653
586	NM_010130	Adgre1	1807	89659	+	17	57448343	57448343	-	3.80404e-06	1.7972e-05	-26.8563
957	NM_029012	Sppl3	3108	19212	+	5	115030734	115030734	+	0.000134888	0.000425701	-26.8474
365	NM_001290692	Becn2	265	14439	+	1	175934766	175934766	+	1.46811e-06	7.60623e-06	-26.8405
866	NM_026321	Fam174a	137	-73815	+	1	95239813	95239813	-	2.88798e-12	4.18494e-11	-26.8309
60	NM_001033336	Abcc4	1238	2768	-	14	118703452	118703452	+	2.24479e-16	5.47193e-15	-26.8169
279	NM_001177783	Rfpl4b	339	132069	-	10	38689711	38689711	+	2.50557e-05	9.69123e-05	-26.8132
788	NM_021405	Cst10	2378	-141323	+	2	149263926	149263926	+	1.17364e-07	7.71576e-07	-26.8109
470	NM_008104	Gcm2	942	14553	-	13	41095436	41095436	-	4.87966e-05	0.000174614	-26.801
362	NM_001290627	Atp4a	3604	2343	+	7	30714550	30714550	+	0.000141694	0.000444447	-26.7813
253	NM_001164112	Nfatc1	2056	1121	-	18	80707053	80707053	+	1.02294e-13	1.8033e-12	-26.772
737	NM_016902	Nphp1	2347	3566	-	2	127785326	127785326	-	1.70741e-08	1.31595e-07	-26.7699
107	NM_001077364	Tsc22d3	4352	-24933	-	X	140625454	140625454	-	6.57882e-09	5.47372e-08	-26.7632
616	NM_010666	Krt27	687	-1257	-	11	99352374	99352374	-	5.11927e-16	1.19352e-14	-26.7598
316	NM_001276475	Scgb2b27	3611	9563	-	7	34004380	34004380	+	9.93105e-11	1.14155e-09	-26.7556
150	NM_001082532	Pigyl	4075	9254	+	9	22166098	22166098	+	5.30254e-05	0.000187822	-26.7498
136	NM_001081300	Tshz1	2079	24918	-	18	84061645	84061645	+	3.59632e-06	1.70923e-05	-26.7494
1184	NM_172910	Dlgap2	3824	83470	+	8	14179343	14179343	-	3.71234e-22	1.59638e-20	-26.7485
482	NM_008229	Hdac2	338	-43061	+	10	36931483	36931483	+	4.72571e-10	4.83648e-09	-26.7396
797	NM_021532	Dact1	791	-12685	+	12	71297199	71297199	+	1.106e-10	1.26121e-09	-26.7308
363	NM_001290627	Atp4a	3605	6070	+	7	30718277	30718277	-	7.96789e-47	1.67035e-44	-26.7258
759	NM_019536	Dnah10	3146	-9721	+	5	124715364	124715364	+	6.93233e-05	0.000237557	-26.7193
1222	NM_175499	Slitrk6	1218	601942	-	14	110153208	110153208	-	7.34517e-10	7.27177e-09	-26.7083
234	NM_001162880	Syce3	1406	-4317	-	15	89414819	89414819	-	4.09472e-08	2.94981e-07	-26.7072
754	NM_019445	Fmn2	262	152334	+	1	174654157	174654157	-	3.39821e-10	3.58281e-09	-26.6784
1100	NM_145507	Dars	172	-39941	-	1	128457356	128457356	+	4.874e-06	2.24624e-05	-26.67
956	NM_029012	Sppl3	3107	-4110	+	5	115007414	115007414	-	7.30337e-08	5.01638e-07	-26.6451
673	NM_011580	Thbs1	2333	53573	+	2	118165447	118165447	-	2.51716e-05	9.73065e-05	-26.6449
347	NM_001289684	Jade3	4243	43343	+	X	20469029	20469029	-	6.22463e-06	2.78998e-05	-26.6302
568	NM_009663	Alox5ap	3228	22881	+	5	149287883	149287883	-	2.26464e-10	2.46142e-09	-26.6226
610	NM_010406	Hc	2237	3301	-	2	35058141	35058141	-	5.80968e-05	0.000203593	-26.6026
296	NM_001204166	Rapgef4	2281	-10130	+	2	72044487	72044487	+	3.42925e-07	2.04399e-06	-26.5945
936	NM_028483	Cib4	2951	17159	-	5	30528678	30528678	+	1.25094e-13	2.18155e-12	-26.5944
1081	NM_139146	Satb2	78	49138	-	1	56922197	56922197	+	6.28557e-19	1.99049e-17	-26.5861
1113	NM_146304	Olfr1340	2822	887	+	4	118727134	118727134	+	8.16561e-17	2.08438e-15	-26.5857
187	NM_001110274	Slc14a2	2050	-3209	-	18	78209648	78209648	-	2.5706e-08	1.92088e-07	-26.5854
832	NM_025285	Stmn2	2481	45889	+	3	8555414	8555414	-	1.58727e-29	1.21737e-27	-26.5784
825	NM_023913	Ern1	702	-6436	-	11	106494231	106494231	-	0.000116193	0.000373997	-26.5762
745	NM_018792	H1f9	661	-10484	+	11	94957109	94957109	+	1.61095e-29	1.23365e-27	-26.5718
530	NM_009063	Rgs5	253	22589	+	1	169678088	169678088	+	2.08585e-07	1.30058e-06	-26.5672
552	NM_009330	Hnf1b	639	40	+	11	83850907	83850907	-	5.20041e-12	7.24175e-11	-26.5619
312	NM_001271766	Gpr35	134	371	+	1	92975716	92975716	+	8.1653e-07	4.49125e-06	-26.5617
216	NM_001145433	Smim20	2986	26144	+	5	53293248	53293248	-	2.68433e-09	2.41083e-08	-26.5512
859	NM_026177	Gpalpp1	1168	901	-	14	76109915	76109915	+	3.9141e-34	4.16337e-32	-26.5488
83	NM_001033979	Ldlrad2	2868	1992	-	4	137573189	137573189	-	4.03927e-05	0.000147832	-26.5387
1137	NM_153102	Zfp352	2777	-100751	+	4	90118069	90118069	-	6.12085e-08	4.26234e-07	-26.5334
1185	NM_172943	Alkbh5	582	-12111	+	11	60525572	60525572	-	0.00217126	0.0047103	-26.5306
591	NM_010180	Fbln1	1395	29442	+	15	85235448	85235448	-	0.000582011	0.00152591	-26.5291
1098	NM_145489	AI661453	1788	-801	+	17	47435838	47435838	+	1.48721e-18	4.51843e-17	-26.529
491	NM_008478	L1cam	4280	7711	-	X	73873124	73873124	+	1.11739e-08	8.92077e-08	-26.505
270	NM_001172121	Rbms3	4199	-37115	-	9	117667027	117667027	-	1.33824e-09	1.26748e-08	-26.5011
205	NM_001122820	Ap3m2	3841	5991	-	8	22799664	22799664	+	9.45175e-07	5.11663e-06	-26.494
1317	NM_207022	Tas2r118	3260	-86111	-	6	24056170	24056170	-	9.68533e-47	2.00532e-44	-26.4908
30	NM_001013577	Inip	2750	15583	-	4	59768273	59768273	-	1.20008e-13	2.09868e-12	-26.482
808	NM_022428	Irx6	3959	69368	+	8	92743655	92743655	+	4.07337e-24	2.05764e-22	-26.4722
1156	NM_172277	Snx8	3192	-3006	-	5	140392252	140392252	+	1.70745e-18	5.15949e-17	-26.4577
1139	NM_153107	Cpz	2966	22490	-	5	35503137	35503137	-	3.44915e-06	1.64613e-05	-26.4544
914	NM_027492	Naa30	1137	-49884	+	14	49122362	49122362	+	5.36944e-08	3.78254e-07	-26.4418
537	NM_009147	Sec23a	781	47265	-	12	58964753	58964753	-	0.000156007	0.000483943	-26.4328
755	NM_019446	Barhl1	2221	1183	-	2	28915239	28915239	-	7.73563e-11	9.0722e-10	-26.4283
945	NM_028803	Gbe1	1613	20498	+	16	70334445	70334445	+	3.37041e-09	2.96872e-08	-26.4133
341	NM_001289474	Erbin	1059	-7144	-	13	103927729	103927729	-	5.91981e-22	2.49238e-20	-26.4095
742	NM_017375	Ostf1	2102	16123	-	19	18615691	18615691	-	4.32471e-09	3.73603e-08	-26.4082
302	NM_001244692	St18	6	100685	+	1	6587914	6587914	-	3.01016e-08	2.22489e-07	-26.4069
420	NM_001326288	Naaladl2	2492	-175695	-	3	24959700	24959700	+	1.08118e-05	4.56963e-05	-26.4066
406	NM_001310841	Cadm1	4113	-9403	+	9	47520767	47520767	+	3.23557e-10	3.42366e-09	-26.4062
558	NM_009510	Ezr	1672	5033	-	17	6777748	6777748	-	2.39097e-08	1.79465e-07	-26.4018
1127	NM_146969	Olfr1243	2301	7902	-	2	89520507	89520507	-	2.98859e-15	6.34176e-14	-26.3939
340	NM_001288627	Emp1	3472	9158	+	6	135376649	135376649	+	4.90156e-06	2.25708e-05	-26.3926
943	NM_028772	Dmgdh	1035	3090	+	13	93677524	93677524	-	1.69255e-06	8.66114e-06	-26.3903
784	NM_020600	Rps14	1994	8349	+	18	60782943	60782943	-	6.09512e-23	2.80567e-21	-26.3889
1326	NM_207707	Esr2	805	48220	-	12	76129040	76129040	-	0.000213069	0.00063605	-26.3845
389	NM_001305058	Spata19	4079	33715	+	9	27430925	27430925	+	2.2486e-15	4.83885e-14	-26.3844
453	NM_007929	Emp2	1504	39155	-	16	10274814	10274814	+	2.34089e-15	5.02884e-14	-26.375
1243	NM_177396	Ifnl3	3593	4782	+	7	28527616	28527616	+	0.00111699	0.0026784	-26.3729
1103	NM_145557	9430015G10Rik	2927	-7712	+	4	156102286	156102286	-	7.3521e-07	4.08505e-06	-26.3697
211	NM_001141930	Ctnnbip1	2895	19392	+	4	149564507	149564507	-	9.18169e-05	0.000304698	-26.3643
886	NM_026743	Tspan11	3451	3734	+	6	127891354	127891354	-	1.3505e-05	5.59694e-05	-26.3566
703	NM_013726	Dbf4	2935	13331	-	5	8409386	8409386	-	1.23453e-07	8.08438e-07	-26.3564
1084	NM_139272	Galnt2	4046	29042	+	8	124260434	124260434	-	2.79935e-06	1.36554e-05	-26.3421
1131	NM_148938	Slc1a3	1261	28058	-	15	8682750	8682750	-	3.91995e-14	7.28561e-13	-26.3414
549	NM_009305	Syp	4218	-5882	+	X	7632698	7632698	+	7.53678e-07	4.18166e-06	-26.3338
954	NM_028941	Cmip	4015	2663	+	8	117351831	117351831	+	0.000412516	0.00112975	-26.3285
1178	NM_172845	Adamts4	257	2259	+	1	171252679	171252679	-	0.000127396	0.000405031	-26.3281
85	NM_001034864	Tesl1	4244	40274	+	X	23933035	23933035	+	1.5431e-20	5.62993e-19	-26.3254
918	NM_027668	4933412E24Rik	1326	77037	-	15	59939582	59939582	+	7.14357e-05	0.000243816	-26.3111
1037	NM_080793	Setd7	2521	-11133	-	3	51571955	51571955	-	4.5637e-22	1.94585e-20	-26.3099
999	NM_030725	Syt13	2304	19185	+	2	92934284	92934284	+	0.000188492	0.000570674	-26.287
77	NM_001033766	4930596D02Rik	1123	-116470	-	14	35928447	35928447	+	0.000234928	0.000692916	-26.2784
141	NM_001081373	Cep164	4109	1203	-	9	45827436	45827436	+	3.66205e-05	0.000135396	-26.2707
73	NM_001033547	Ccdc185	281	59212	-	1	182689969	182689969	-	6.80633e-06	3.02273e-05	-26.2703
650	NM_011171	Procr	2391	2771	+	2	155753986	155753986	-	0.000251586	0.000735067	-26.2666
1111	NM_146135	Pias3	2576	-7241	+	3	96689134	96689134	-	2.03279e-06	1.02121e-05	-26.2623
1203	NM_174876	Impg2	1595	126474	+	16	56330785	56330785	-	5.19e-06	2.37124e-05	-26.2452
338	NM_001287015	Rnpc3	2597	-129124	-	3	113759272	113759272	+	2.33429e-28	1.65881e-26	-26.2424
862	NM_026286	Ftmt	1970	-170337	+	18	52161199	52161199	+	5.59706e-13	8.96971e-12	-26.2411
164	NM_001099330	Scgb1b30	3612	9677	+	7	34105106	34105106	+	3.41867e-13	5.67286e-12	-26.2375
935	NM_028387	Macrod2	2362	43717	+	2	140439150	140439150	-	2.21437e-05	8.67611e-05	-26.2243
723	NM_015777	Igbp1b	3492	-53181	-	6	138711624	138711624	-	9.55523e-28	6.4878e-26	-26.2144
979	NM_029620	Pcolce2	4163	1057	+	9	95638683	95638683	-	0.00048176	0.00129458	-26.2105
364	NM_001290691	Col9a1	19	117139	+	1	24312340	24312340	-	2.84579e-06	1.38514e-05	-26.2085
600	NM_010293	Gykl1	1974	-20793	+	18	52672886	52672886	-	9.77169e-09	7.87627e-08	-26.2048
185	NM_001109975	Synpo	1992	5461	-	18	60604644	60604644	-	4.82955e-07	2.78845e-06	-26.1963
1149	NM_153588	Mrtfb	1520	-10661	+	16	13347760	13347760	+	2.31846e-11	2.9323e-10	-26.1932
238	NM_001163143	C2cd4a	4140	-465	-	9	67832794	67832794	-	4.83571e-06	2.23186e-05	-26.1907
431	NM_007451	Slc25a5	4248	-19388	+	X	36776209	36776209	+	0.0011822	0.00281	-26.1846
976	NM_029441	Cdyl2	4011	6818	-	8	116726174	116726174	-	9.57994e-12	1.28978e-10	-26.1608
382	NM_001301424	Slc7a1	3225	18179	-	5	148374637	148374637	+	6.91009e-05	0.000236876	-26.1355
922	NM_027788	Fam83c	2392	-21887	-	2	155856740	155856740	+	3.79836e-05	0.000139911	-26.131
467	NM_008045	Fshb	2323	7479	-	2	107052173	107052173	-	4.93471e-44	8.89881e-42	-26.1275
1128	NM_146992	Olfr204	1600	-6060	-	16	59321464	59321464	+	4.90647e-15	1.0167e-13	-26.1195
308	NM_001256066	Scgb1b29	3609	175429	+	7	32616968	32616968	-	4.95002e-09	4.2197e-08	-26.1093
82	NM_001033978	H2-Eb2	1750	92	+	17	34325765	34325765	+	5.4935e-05	0.000193782	-26.107
333	NM_001286181	Lox	1973	24714	-	18	52505008	52505008	-	9.96427e-80	6.86748e-77	-26.1048
780	NM_019998	Alg2	2730	27221	-	4	47447147	47447147	+	0.000193028	0.000582828	-26.1044
1163	NM_172557	Rufy1	565	1990	-	11	50429122	50429122	+	0.00108067	0.0026046	-26.0958
1219	NM_175432	Tmem132c	3155	2502	+	5	127244326	127244326	+	9.50524e-11	1.09786e-09	-26.0954
5	NM_001004357	Cntnap2	3299	-313013	+	6	44747048	44747048	+	2.60463e-05	0.000100333	-26.0945
1066	NM_138582	Vwa7	1752	1120	+	17	35017697	35017697	-	0.000691435	0.0017747	-26.0921
627	NM_010745	Ly86	932	1324	+	13	37346667	37346667	-	0.000548314	0.00145042	-26.0791
377	NM_001293682	Ndst3	2611	-25968	-	3	123645417	123645417	-	3.87746e-06	1.82766e-05	-26.0685
919	NM_027758	Tbc1d9	3935	-115774	+	8	83049578	83049578	-	0.000625889	0.00162781	-26.0635
748	NM_018869	Grk5	2179	2935	+	19	60892682	60892682	-	3.37027e-47	7.21559e-45	-26.0481
1088	NM_144834	Serpina10	859	20113	-	12	103611332	103611332	-	1.15316e-07	7.59801e-07	-26.0265
927	NM_028120	Cep89	3620	19119	+	7	35416210	35416210	+	5.34797e-06	2.43545e-05	-26.0234
1110	NM_146059	Ccdc166	1355	-658	-	15	75982942	75982942	-	1.08584e-08	8.686e-08	-26.0208
882	NM_026634	A930018P22Rik	2315	142338	+	2	104265105	104265105	-	0.00014528	0.000454536	-26.0201
870	NM_026400	Dnajb11	1541	13110	+	16	22870953	22870953	-	2.55682e-11	3.20716e-10	-26.0143
925	NM_028025	Mageb16	4289	-163782	-	X	79835216	79835216	+	3.34862e-08	2.44595e-07	-26.0126
1136	NM_153098	Cd109	4153	19120	+	9	78634664	78634664	-	4.58558e-16	1.07558e-14	-26.005
255	NM_001164594	Pdzrn4	1416	117408	+	15	92714515	92714515	+	3.3452e-09	2.9491e-08	-25.9851
350	NM_001289762	Rarb	1085	-112582	-	14	16688057	16688057	-	0.00201126	0.00441555	-25.9671
809	NM_022428	Irx6	3960	69595	+	8	92743882	92743882	+	5.7861e-08	4.0466e-07	-25.9494
94	NM_001039485	Piezo2	1998	109342	-	18	63277842	63277842	-	1.43808e-05	5.92041e-05	-25.9316
540	NM_009182	St8sia3	2002	-118681	+	18	64135678	64135678	-	3.22668e-13	5.37021e-12	-25.9177
380	NM_001294278	Isx	3923	-737935	+	8	74135239	74135239	+	6.67695e-53	1.93065e-50	-25.9101
649	NM_011117	Plec	1357	-3515	-	15	76234892	76234892	+	3.15068e-07	1.89375e-06	-25.9044
1267	NM_178589	Tnfrsf21	1771	30535	+	17	43047088	43047088	-	1.46153e-06	7.57994e-06	-25.8941
669	NM_011510	Abcc8	3636	1044	-	7	46178990	46178990	-	7.35465e-10	7.27831e-09	-25.8932
962	NM_029182	Rasd2	3924	-43881	+	8	75170063	75170063	+	3.81436e-07	2.24903e-06	-25.8917
357	NM_001290429	Ccdc106	3557	-18	+	7	5056134	5056134	-	0.000113975	0.000367822	-25.8865
424	NM_007398	Ada	2416	-14459	-	2	163764697	163764697	-	2.28317e-05	8.91512e-05	-25.8798
1146	NM_153570	Noc4l	3087	16308	-	5	110637075	110637075	+	2.40601e-06	1.19134e-05	-25.8704
817	NM_023245	Palmd	2603	-17321	-	3	116986272	116986272	-	7.78292e-34	8.10718e-32	-25.8603
869	NM_026400	Dnajb11	1540	4460	+	16	22862303	22862303	+	7.04829e-19	2.21635e-17	-25.858
771	NM_019737	B4galt6	1914	-61501	-	18	20807904	20807904	-	3.76571e-24	1.91182e-22	-25.8552
527	NM_009019	Rag1	2311	328	-	2	101649205	101649205	-	6.48572e-08	4.49837e-07	-25.8521
1237	NM_177161	P4ha3	3714	628	+	7	100286146	100286146	-	8.04318e-13	1.2587e-11	-25.8481
1012	NM_033595	Pcdhga12	1952	1340	+	18	37766918	37766918	-	3.74407e-05	0.000138144	-25.8462
598	NM_010252	Gabrg1	3006	-339	-	5	70842955	70842955	-	4.70764e-09	4.03428e-08	-25.8438
487	NM_008379	Kpnb1	680	-7403	-	11	97195294	97195294	+	7.00764e-13	1.10558e-11	-25.8332
1030	NM_053126	Pcdhb1	1946	905	+	18	37265901	37265901	+	0.000186486	0.000565485	-25.8292
160	NM_001093754	Dennd2d	2591	-20358	+	3	106462073	106462073	-	1.12662e-07	7.44068e-07	-25.8166
915	NM_027514	Pvr	3579	-600	-	7	19921742	19921742	+	2.13456e-07	1.32815e-06	-25.8165
773	NM_019771	Dstn	2368	8091	+	2	143923420	143923420	-	5.8433e-07	3.31443e-06	-25.8141
536	NM_009147	Sec23a	780	66509	-	12	58945509	58945509	+	6.88975e-10	6.86415e-09	-25.7895
1056	NM_134170	Vmn1r32	3331	-8753	-	6	66568460	66568460	+	0.000575702	0.00151166	-25.7885
352	NM_001290273	Mtarc1	290	6506	-	1	184804795	184804795	+	8.81382e-16	1.98943e-14	-25.7863
445	NM_007811	Cyp26a1	2138	127211	+	19	37825017	37825017	-	0.000216971	0.000646509	-25.7807
1295	NM_183406	Cox6b2	3555	3964	-	7	4748939	4748939	-	1.40643e-06	7.3259e-06	-25.7794
529	NM_009030	Rbbp4	2845	23375	-	4	129311996	129311996	+	0.000820201	0.00205356	-25.7735
711	NM_013836	Tcf20	1387	-8927	-	15	82921060	82921060	+	5.88511e-06	2.65317e-05	-25.7602
904	NM_026929	Chac1	2335	-2078	+	2	119349164	119349164	+	1.97533e-06	9.95327e-06	-25.7598
400	NM_001310535	Ctbp1	2960	-4561	-	5	33279564	33279564	-	6.67594e-07	3.74159e-06	-25.7576
938	NM_028547	Kif2b	654	-482006	-	11	92059560	92059560	-	3.77339e-10	3.94547e-09	-25.7458
114	NM_001081016	Zc3h7b	1383	1722	+	15	81746568	81746568	+	0.000863413	0.00214509	-25.7319
827	NM_024219	Hsbp1	4028	-132283	+	8	119212255	119212255	+	2.16611e-09	1.98121e-08	-25.7296
80	NM_001033814	4930432M17Rik	2607	-7399	+	3	121663364	121663364	+	1.60273e-26	9.88198e-25	-25.7277
804	NM_022312	Tnr	224	38955	+	1	159562722	159562722	-	1.01851e-21	4.16276e-20	-25.7114
1175	NM_172815	Rspo2	1309	22012	-	15	43148807	43148807	+	0.000559275	0.00147468	-25.7056
104	NM_001045558	Pick1	1373	3873	+	15	79233253	79233253	-	3.0981e-06	1.49489e-05	-25.6765
841	NM_025696	Sorcs3	2164	521025	+	19	48727048	48727048	+	7.48418e-50	1.85491e-47	-25.669
295	NM_001201322	Tex49	1462	12577	+	15	98583579	98583579	-	0.000329097	0.000928483	-25.6667
581	NM_009918	Cnga3	38	-302	+	1	37218903	37218903	+	1.45487e-17	3.99989e-16	-25.6538
931	NM_028231	Kcnmb2	2501	5382	+	3	31908083	31908083	+	2.39214e-05	9.29376e-05	-25.6451
696	NM_013531	Gnb4	2502	-1110	-	3	32617644	32617644	+	5.16741e-05	0.000183631	-25.641
1096	NM_145463	Shisa2	1148	142840	+	14	59768119	59768119	+	4.07525e-07	2.39164e-06	-25.6322
1080	NM_139140	Spats2	1466	845	+	15	99127688	99127688	+	1.25857e-07	8.22788e-07	-25.6281
244	NM_001163354	Rhot1	630	11208	+	11	80220261	80220261	-	1.46197e-07	9.42892e-07	-25.6148
1135	NM_152824	Rbm17	2196	-9460	-	2	11612658	11612658	+	8.67962e-16	1.9609e-14	-25.6111
630	NM_010759	Mageb1	4295	-184915	-	X	92201247	92201247	+	5.72232e-07	3.25388e-06	-25.6014
837	NM_025583	Ctrb1	3995	-6674	-	8	111697683	111697683	-	1.777e-80	1.25923e-77	-25.6002
810	NM_022722	Dpys	1304	15666	-	15	39841805	39841805	+	1.02268e-07	6.81049e-07	-25.5998
252	NM_001164047	Mb	1362	-6468	-	15	77029254	77029254	-	0.000153138	0.000476366	-25.595
8	NM_001005341	Ypel2	643	34123	-	11	86959640	86959640	+	2.30656e-27	1.52095e-25	-25.5929
1305	NM_198649	Ablim3	1996	28669	-	18	61883156	61883156	-	3.41841e-07	2.03778e-06	-25.5888
619	NM_010700	Ldlr	4071	17071	+	9	21740645	21740645	+	8.53371e-08	5.7825e-07	-25.5854
1052	NM_134023	Tbc1d10a	501	-10118	+	11	4176715	4176715	+	5.38513e-05	0.000190413	-25.5681
1292	NM_183158	Cyp2ab1	1534	-4430	-	16	20329833	20329833	-	3.46136e-08	2.52207e-07	-25.5671
254	NM_001164441	Ankrd33b	1297	48748	-	15	31319012	31319012	-	8.45106e-06	3.65757e-05	-25.5566
15	NM_001009547	Adam26b	3887	85119	-	8	43443019	43443019	+	0.000147806	0.000461577	-25.5439
544	NM_009228	Snta1	2386	-268	-	2	154408351	154408351	+	4.46534e-10	4.6009e-09	-25.5319
951	NM_028892	Spag17	2582	-106382	+	3	99779035	99779035	-	6.35134e-09	5.30062e-08	-25.5156
25	NM_001013365	Osm	502	-2191	+	11	4234594	4234594	+	9.61818e-07	5.19889e-06	-25.5136
765	NM_019667	Stam2	2254	-48202	-	2	52790350	52790350	-	1.83884e-17	4.99008e-16	-25.512
1189	NM_173405	Amz1	3194	-781	+	5	140723346	140723346	-	8.66825e-05	0.000289473	-25.5109
1201	NM_173864	C1s2	3435	17248	-	6	124618838	124618838	-	5.902e-14	1.07394e-12	-25.5038
1213	NM_175280	Cfap61	2373	3440	+	2	145938222	145938222	+	2.9546e-09	2.63196e-08	-25.5011
174	NM_001102581	Vmn2r95	1689	-13480	+	17	18410624	18410624	-	1.23627e-11	1.63382e-10	-25.4739
242	NM_001163267	Cfap58	2161	4496	+	19	47942206	47942206	-	5.55014e-16	1.28682e-14	-25.4729
1004	NM_031396	Cnnm1	2154	31580	+	19	43472014	43472014	+	2.69756e-05	0.000103485	-25.4709
449	NM_007855	Twist2	132	3349	+	1	91804808	91804808	-	0.00138775	0.00322088	-25.4587
339	NM_001288627	Emp1	3471	5142	+	6	135372633	135372633	+	4.12563e-06	1.93304e-05	-25.4375
74	NM_001033548	Dnaaf3	3551	920	-	7	4531523	4531523	-	2.4521e-05	9.50471e-05	-25.4206
1260	NM_177906	Opcml	4080	229239	+	9	28020506	28020506	-	5.37993e-10	5.46381e-09	-25.4148
580	NM_009910	Cxcr3	4310	28170	-	X	101705978	101705978	-	1.31845e-17	3.65278e-16	-25.4046
508	NM_008674	Nat3	3913	98546	+	8	67622398	67622398	+	6.16046e-05	0.000214392	-25.402
1089	NM_144854	Map3k7cl	1633	-7796	+	16	87545534	87545534	+	2.32422e-07	1.43376e-06	-25.396
828	NM_024219	Hsbp1	4031	-59626	+	8	119284912	119284912	+	3.93327e-07	2.31506e-06	-25.3942
51	NM_001033040	Ccdc189	3749	1020	-	7	127587576	127587576	+	1.5028e-08	1.17115e-07	-25.3927
1042	NM_130796	Snx18	1073	6215	-	13	113612350	113612350	+	6.92447e-06	3.06786e-05	-25.3792
1218	NM_175340	Nhlrc1	962	27716	-	13	46987135	46987135	-	1.68027e-10	1.86536e-09	-25.3521
1120	NM_146628	Olfr344	2244	35589	+	2	36604187	36604187	+	2.74027e-28	1.93094e-26	-25.3517
1191	NM_173414	Lancl3	4227	-2208	+	X	9197765	9197765	+	1.36602e-10	1.53925e-09	-25.3468
946	NM_028835	Atg7	3401	-4478	+	6	114638619	114638619	-	6.226e-08	4.33137e-07	-25.3289
1062	NM_134247	Acot4	827	3528	+	12	84041905	84041905	-	5.67752e-06	2.57004e-05	-25.3208
492	NM_008493	Lep	3267	11684	+	6	29071903	29071903	+	3.41768e-05	0.000127428	-25.3086
654	NM_011202	Ptpn11	3138	82225	-	5	121109173	121109173	-	7.92997e-09	6.49479e-08	-25.3
7	NM_001005232	Dbx1	3641	19905	-	7	49616931	49616931	+	4.84135e-11	5.82309e-10	-25.2881
1221	NM_175499	Slitrk6	1217	602207	-	14	110152943	110152943	+	1.47264e-14	2.88857e-13	-25.2866
512	NM_008764	Tnfrsf11b	1316	25527	-	15	54252958	54252958	-	0.000274419	0.000792666	-25.283
1181	NM_172885	Tmem132d	3161	204914	-	5	128228164	128228164	+	3.44798e-15	7.27057e-14	-25.2698
1118	NM_146628	Olfr344	2243	35584	+	2	36604182	36604182	+	1.19829e-23	5.82498e-22	-25.2543
250	NM_001163675	Abcc4	1237	11444	-	14	118665488	118665488	+	7.26826e-08	4.99363e-07	-25.2523
1001	NM_031247	Gimap3	3303	-985	-	6	48771835	48771835	-	3.20666e-07	1.92386e-06	-25.2513
61	NM_001033351	Grin3a	2736	-63685	-	4	49909453	49909453	-	2.71024e-14	5.14366e-13	-25.2478
129	NM_001081206	Dgki	3292	45458	-	6	37254519	37254519	-	0.000115111	0.000371106	-25.2445
1031	NM_053173	Kifc5b	1706	-5557	+	17	26911534	26911534	+	5.91429e-06	2.66441e-05	-25.2412
726	NM_016720	Neu3	3713	20978	-	7	99807440	99807440	+	0.000107328	0.000348922	-25.2378
818	NM_023275	Rhoj	804	46489	+	12	75354800	75354800	-	6.87167e-10	6.84749e-09	-25.2207
1159	NM_172469	Clic6	1646	19876	+	16	92518021	92518021	-	1.11484e-07	7.37153e-07	-25.1951
805	NM_022317	Slc28a3	998	20399	-	13	58590479	58590479	+	3.43956e-15	7.25586e-14	-25.1819
1020	NM_033652	Lmx1a	246	109721	+	1	167799277	167799277	-	1.19885e-05	5.01847e-05	-25.1776
281	NM_001177844	Frmd4a	2183	10846	+	2	4570598	4570598	+	8.952e-09	7.26137e-08	-25.1746
1309	NM_199302	Lrsam1	2232	21163	-	2	32940093	32940093	-	6.5366e-05	0.000225796	-25.1685
534	NM_009107	Rxrg	244	-14279	+	1	167584083	167584083	-	5.95819e-11	7.0851e-10	-25.1632
358	NM_001290451	Gria3	4253	50	+	X	41401577	41401577	-	2.71928e-09	2.44091e-08	-25.1629
429	NM_007426	Angpt2	3831	20275	-	8	18721288	18721288	+	6.20309e-07	3.50193e-06	-25.1626
419	NM_001320258	Mmp25	1700	-562	-	17	23645830	23645830	+	4.53634e-05	0.000163773	-25.1608
692	NM_011923	Angptl2	2233	28340	+	2	33244299	33244299	+	3.68246e-05	0.00013605	-25.1526
155	NM_001085520	Gm12789	2794	8364	+	4	101995202	101995202	-	0.000217102	0.000646861	-25.1518
812	NM_022881	Rgs18	202	-613010	-	1	145388430	145388430	+	2.07191e-09	1.90085e-08	-25.1395
923	NM_027897	Rhpn2	3619	24361	+	7	35358596	35358596	+	3.96923e-07	2.33351e-06	-25.1361
658	NM_011347	Selp	235	13296	+	1	164128558	164128558	+	0.000373624	0.00103644	-25.1183
1207	NM_175109	Rps19bp1	1379	-5664	-	15	80269969	80269969	+	5.57528e-07	3.17781e-06	-25.1147
209	NM_001136079	Ptger4	1255	26803	-	15	5217385	5217385	+	1.05057e-11	1.40352e-10	-25.1103
709	NM_013833	Rax	2007	4350	-	18	65934740	65934740	-	7.94392e-07	4.38291e-06	-25.1082
1266	NM_178398	Wipi2	3207	19026	+	5	142648608	142648608	-	6.16802e-08	4.29281e-07	-25.1068
473	NM_008132	Glrp1	122	5991	-	1	88504076	88504076	+	0.00018236	0.000554445	-25.1002
194	NM_001113208	Ncam2	1623	147560	+	16	81348255	81348255	-	9.2163e-14	1.6356e-12	-25.0908
1275	NM_178703	Slc6a1	3398	48953	+	6	114331586	114331586	-	0.000255286	0.000744278	-25.0885
415	NM_001317124	Hrh1	3400	22317	+	6	114480837	114480837	+	0.000830913	0.00207707	-25.0868
573	NM_009734	Cep131	730	2183	-	11	120084645	120084645	+	0.000196174	0.00059144	-25.0833
142	NM_001081405	Vmn2r28	3559	9212	-	7	5484640	5484640	-	4.55742e-05	0.000164392	-25.0808
716	NM_013848	Ermap	2826	378	-	4	119189634	119189634	+	5.73824e-06	2.59183e-05	-25.08
757	NM_019496	Ammecr1	4355	113646	-	X	142853083	142853083	+	2.25722e-14	4.3379e-13	-25.0738
314	NM_001276403	Lef1	2621	22452	+	3	131135241	131135241	+	2.5005e-26	1.51573e-24	-25.0698
662	NM_011384	Six6	793	11798	+	12	72951678	72951678	+	3.20063e-06	1.5396e-05	-25.0659
982	NM_029780	Raf1	3406	-5093	-	6	115681727	115681727	+	3.73683e-07	2.20693e-06	-25.054
277	NM_001177629	Grb10	508	16215	-	11	12011757	12011757	+	1.81757e-07	1.14781e-06	-25.0477
971	NM_029316	1700020N15Rik	4279	-115013	+	X	69830268	69830268	-	2.37031e-10	2.56851e-09	-25.0401
37	NM_001018031	Otol1	2538	61390	+	3	70069001	70069001	-	4.37595e-10	4.51434e-09	-25.0387
1011	NM_033593	Pcdhga10	1951	294	+	18	37747480	37747480	+	5.72193e-09	4.82136e-08	-25.0367
1303	NM_198622	H1f10	3368	10731	-	6	87970752	87970752	-	2.06327e-23	9.8583e-22	-25.0343
690	NM_011896	Spry1	2512	5575	+	3	37645520	37645520	-	2.54863e-20	9.13303e-19	-25.0328
667	NM_011446	Sox7	1154	-1232	+	14	63942474	63942474	-	3.02263e-05	0.000114368	-25.0262
631	NM_010763	Man1a2	2584	-36418	-	3	100721890	100721890	-	5.00876e-05	0.000178636	-25.0216
1271	NM_178616	Psmd11	631	1264	+	11	80429877	80429877	-	3.13597e-15	6.64049e-14	-25.0161
1102	NM_145554	Ldlrap1	2859	-21019	-	4	134789022	134789022	-	1.68997e-05	6.83382e-05	-25.0085
115	NM_001081016	Zc3h7b	1384	5705	+	15	81750551	81750551	+	6.27963e-05	0.000217922	-25.0079
546	NM_009233	Sox1	3820	15654	+	8	12411171	12411171	-	3.98832e-10	4.14676e-09	-25.0041
642	NM_010920	Nkx2-6	1162	-25290	+	14	69146512	69146512	+	5.24028e-10	5.33166e-09	25.0143
1258	NM_177793	Mettl24	340	99007	+	10	40782287	40782287	-	6.69606e-08	4.63213e-07	25.0265
206	NM_001126317	Gm1140	4277	219360	-	X	67474203	67474203	-	4.44443e-06	2.06942e-05	25.0302
1285	NM_181421	Hectd4	3139	9075	+	5	121229292	121229292	-	0.000826132	0.00206614	25.0809
1229	NM_175647	Dmrta1	2776	1608	+	4	89689804	89689804	-	6.20288e-09	5.18752e-08	25.1465
399	NM_001310464	Reln	2948	-633	-	5	22345337	22345337	+	3.24485e-10	3.43263e-09	25.1728
514	NM_008781	Pax3	109	55094	-	1	78142043	78142043	+	0.00295426	0.00612956	25.3407
443	NM_007708	Cit	3114	4710	+	5	115850364	115850364	-	8.12831e-11	9.49952e-10	25.3899
799	NM_021610	Gpa33	238	43248	+	1	166173706	166173706	-	5.55223e-06	2.52054e-05	25.4107
486	NM_008277	Hpd	3144	-12457	-	5	123195142	123195142	-	9.2663e-06	3.97665e-05	25.4492
435	NM_007539	Bdkrb1	862	1340	+	12	105605429	105605429	+	5.05778e-07	2.90822e-06	25.463
1147	NM_153579	Sv2b	3675	-52056	-	7	75361317	75361317	+	8.48283e-05	0.000283789	25.5208
861	NM_026267	Necap1	3431	9294	+	6	122883849	122883849	+	7.36284e-05	0.000250518	25.5351
522	NM_008908	Ppic	1976	28366	-	18	53389642	53389642	+	9.14621e-08	6.14868e-07	25.5846
751	NM_019430	Cacng3	3740	-101972	+	7	122569772	122569772	+	0.000261088	0.000759039	25.5932
760	NM_019537	Psmg1	1659	-24140	-	16	96015042	96015042	+	0.000398952	0.00109864	25.6519
563	NM_009602	Chrnb2	2564	6964	-	3	89757669	89757669	-	8.5362e-09	6.94608e-08	25.797
791	NM_021441	Taf1c	4034	-728	-	8	119605967	119605967	+	1.4369e-05	5.91652e-05	25.8846
410	NM_001311141	Il12rb2	3332	28932	-	6	67310763	67310763	-	0.00296626	0.00615192	25.9691
52	NM_001033041	Acmsd	171	-2629	+	1	127726784	127726784	-	5.67876e-06	2.57004e-05	25.9916
1072	NM_138602	Praf2	4220	4191	+	X	7732760	7732760	+	7.86233e-14	1.40523e-12	25.9953
225	NM_001159275	Slc25a2	1947	19785	-	18	37618939	37618939	+	2.43922e-16	5.92292e-15	26.0163
436	NM_007563	Bpgm	3288	1453	+	6	34477807	34477807	-	1.64966e-06	8.46228e-06	26.0923
719	NM_015744	Enpp2	1317	-771	-	15	54920916	54920916	+	0.000296143	0.000847582	26.11
689	NM_011891	Sgcd	562	193363	-	11	47185940	47185940	+	2.81038e-13	4.70539e-12	26.186
122	NM_001081130	Ogdhl	1109	8740	+	14	32330757	32330757	-	1.1439e-08	9.1079e-08	26.1988
385	NM_001302636	Phactr1	945	-78109	+	13	42788138	42788138	-	1.16006e-10	1.3169e-09	26.4905
109	NM_001077510	Gnas	2468	21869	+	2	174351956	174351956	-	1.9489e-08	1.48679e-07	26.5443
782	NM_020581	Angptl4	1744	-10635	-	17	33792209	33792209	-	4.83323e-12	6.78112e-11	26.607
464	NM_008037	Fosl2	2955	4813	+	5	32141283	32141283	-	8.84914e-05	0.000294556	26.621
495	NM_008553	Ascl1	414	18384	-	10	87475277	87475277	-	1.44619e-09	1.36104e-08	26.7273
674	NM_011581	Thbs2	1686	-42126	-	17	14736387	14736387	-	2.06234e-06	1.03502e-05	26.7682
478	NM_008187	Cfap20	3963	14111	-	8	95420759	95420759	+	5.4021e-05	0.000190946	26.7901
1220	NM_175473	Fras1	3046	39983	+	5	96413936	96413936	-	1.52849e-06	7.89225e-06	26.8158
38	NM_001024137	Pla2g4d	2336	-5527	-	2	120294595	120294595	-	0.000189502	0.000573353	26.854
388	NM_001302676	Lair1	3549	-4639	-	7	4067842	4067842	-	9.93504e-08	6.63466e-07	27.0109
618	NM_010700	Ldlr	4070	6653	+	9	21730227	21730227	-	3.27755e-11	4.04268e-10	27.0385
803	NM_022312	Tnr	225	82994	+	1	159606761	159606761	+	9.18767e-07	4.98978e-06	27.2528
551	NM_009317	Tal2	2741	6523	+	4	53786226	53786226	+	1.34144e-15	2.96014e-14	27.3059
991	NM_030145	Lsm6	3928	-15344	-	8	78836495	78836495	+	3.08984e-06	1.49191e-05	27.3166
733	NM_016789	Nptx2	3216	41386	+	5	144587271	144587271	+	1.85341e-06	9.38971e-06	27.3569
433	NM_007525	Bard1	96	90098	-	1	71012875	71012875	-	7.83737e-24	3.86206e-22	27.391
739	NM_016968	Olig1	1640	-3340	+	16	91266429	91266429	-	2.75303e-05	0.00010538	27.5024
485	NM_008264	Hoxa13	3312	6798	-	6	52254083	52254083	-	6.33665e-19	2.0051e-17	27.5196
641	NM_010916	Nhlh1	259	-9604	-	1	172067199	172067199	-	0.000152398	0.000474269	27.6801
93	NM_001039368	Polr2k	1298	689	+	15	36174697	36174697	+	0.000232361	0.00068627	27.7589
233	NM_001161855	Taf7l2	458	40062	-	10	116073856	116073856	-	7.04708e-05	0.000240899	27.8006
975	NM_029393	Krt24	686	-8387	-	11	99293624	99293624	-	1.25326e-14	2.48148e-13	27.9359
985	NM_029911	Kcnk10	842	-24204	-	12	98602416	98602416	+	8.42465e-05	0.000282143	28.0423
894	NM_026789	Cfap57	2821	8710	-	4	118611696	118611696	+	2.9182e-14	5.51131e-13	28.2061
683	NM_011808	Ets1	4085	14268	+	9	32710308	32710308	-	1.91078e-05	7.62802e-05	28.2418
1095	NM_144955	Nkx6-1	3064	-3212	-	5	101667922	101667922	-	1.15372e-10	1.3103e-09	28.3124
245	NM_001163548	Cyth3	3210	-13264	+	5	143637977	143637977	+	1.45701e-07	9.40058e-07	28.3865
874	NM_026459	Ccdc70	3836	22046	+	8	21992640	21992640	+	3.85496e-06	1.81807e-05	28.3972
569	NM_009690	Cd5l	2556	-31564	+	3	87326317	87326317	-	1.69352e-43	2.97919e-41	28.4394
704	NM_013732	Cartpt	1054	100312	-	13	99800372	99800372	-	8.48905e-06	3.6718e-05	28.4412
309	NM_001267846	Fign	2264	22878	-	2	64075161	64075161	-	1.37324e-05	5.68088e-05	28.4832
1283	NM_181075	2610524H06Rik	3106	-4791	-	5	114828258	114828258	-	1.46234e-06	7.58302e-06	28.5019
1284	NM_181075	1500011B03Rik	3106	-4791	-	5	114828258	114828258	-	1.46234e-06	7.58302e-06	28.5019
1144	NM_153512	Kcng3	1872	2334	-	17	83629562	83629562	-	2.99558e-08	2.21639e-07	28.8187
500	NM_008591	Met	3253	81415	+	6	17545370	17545370	-	7.3349e-11	8.62032e-10	28.8444
579	NM_009869	Cdh9	1276	483263	+	15	17261362	17261362	+	4.57157e-10	4.69497e-09	28.9273
438	NM_007578	Cacna1a	3938	17811	+	8	84433173	84433173	-	2.24638e-07	1.38982e-06	29.1527
560	NM_009531	Xpc	3378	12899	-	6	91502990	91502990	-	4.76153e-16	1.11425e-14	29.2346
644	NM_010954	Ncam2	1622	-270496	+	16	80930201	80930201	+	2.86936e-46	5.79775e-44	29.3303
17	NM_001010937	Gjb6	1147	-101928	-	14	57235538	57235538	-	2.6756e-09	2.40428e-08	29.3909
1255	NM_177735	Tmem130	3217	47436	-	5	144714143	144714143	+	7.06718e-06	3.12202e-05	29.4118
1010	NM_033586	Pcdhga3	1949	452	+	18	37674785	37674785	+	6.90588e-15	1.40954e-13	29.4286
531	NM_009092	Rps17	3690	51395	-	7	81293840	81293840	-	4.1713e-06	1.9519e-05	29.5014
857	NM_026095	Snrpd3	395	1004	+	10	75519044	75519044	-	9.39558e-10	9.10641e-09	29.507
465	NM_008043	Frat1	2147	8707	+	19	41838675	41838675	+	2.08083e-10	2.27393e-09	29.5161
76	NM_001033621	Myot	1961	1240	+	18	44335312	44335312	+	6.09411e-10	6.13586e-09	29.5238
71	NM_001033471	Cpxcr1	4333	-298930	+	X	116150014	116150014	+	3.54038e-60	1.37019e-57	29.562
119	NM_001081091	Cep152	2344	927	-	2	125624187	125624187	+	1.46972e-06	7.613e-06	29.62
833	NM_025290	Rsph1	1734	-4422	-	17	31281777	31281777	+	1.93508e-06	9.76511e-06	29.7634
633	NM_010817	Psmd7	3985	-54019	-	8	107642500	107642500	+	5.06738e-14	9.28786e-13	29.8321
1157	NM_172287	Spire2	4044	8377	+	8	123341088	123341088	-	5.23906e-06	2.39127e-05	29.8487
140	NM_001081351	Cped1	3257	24808	+	6	22010716	22010716	-	0.000161224	0.000498099	29.8786
547	NM_009237	Sox3	4273	16725	-	X	60876706	60876706	+	1.56355e-08	1.21416e-07	29.886
54	NM_001033296	Sel1l2	2361	29514	-	2	140360197	140360197	+	3.44843e-07	2.05421e-06	29.9197
921	NM_027784	5530400C23Rik	3466	2022	+	6	133294236	133294236	+	1.76136e-30	1.47452e-28	29.955
725	NM_015826	Dmrt1	2115	39705	+	19	25545409	25545409	-	1.48357e-08	1.15778e-07	30.1042
1173	NM_172805	Kcnh5	803	-3505	-	12	75180836	75180836	+	7.94385e-07	4.38291e-06	30.164
1035	NM_054055	Slc13a3	2427	8636	-	2	165464562	165464562	-	3.49308e-13	5.79061e-12	30.2759
1224	NM_175519	Kctd8	3002	438880	-	5	68902830	68902830	+	1.20085e-06	6.35174e-06	30.563
366	NM_001290701	Meaf6	2832	4520	+	4	125089652	125089652	+	4.49271e-11	5.4284e-10	30.5941
246	NM_001163566	Crb2	2246	17606	+	2	37793853	37793853	+	3.24328e-08	2.37895e-07	30.744
451	NM_007901	S1pr1	2600	-61124	-	3	115776178	115776178	+	4.34385e-37	5.4501e-35	30.7653
1257	NM_177793	Mettl24	341	99062	+	10	40782342	40782342	-	5.73677e-24	2.8549e-22	31.2148
264	NM_001168288	Arhgap39	1360	10244	-	15	76807927	76807927	-	4.20009e-11	5.09687e-10	31.282
1272	NM_178617	Necab1	2681	11049	-	4	15138083	15138083	-	4.4413e-16	1.04271e-14	31.3876
871	NM_026438	Ppa1	374	-7578	+	10	61641043	61641043	-	4.31258e-05	0.000156469	31.4359
1195	NM_173436	Cypt2	4322	-36320	+	X	105463452	105463452	+	1.06803e-17	2.99027e-16	31.7478
790	NM_021435	Slc35b4	3287	25959	-	6	34151096	34151096	+	4.22426e-12	5.98177e-11	32.0129
84	NM_001034102	Gm5800	1141	-20499	-	14	51737630	51737630	-	1.43689e-07	9.28744e-07	32.2688
298	NM_001205036	Eef1akmt3	486	3402	-	10	127037993	127037993	+	1.42444e-08	1.11509e-07	32.4094
892	NM_026782	Ccdc167	1722	-73034	-	17	29790050	29790050	+	2.19334e-35	2.47982e-33	32.4506
188	NM_001112798	Slc8a1	1863	-55462	-	17	81793848	81793848	-	6.42995e-16	1.4799e-14	32.7987
842	NM_025696	Sorcs3	2162	155741	+	19	48361764	48361764	-	9.65868e-06	4.12592e-05	32.8573
738	NM_016968	Olig1	1639	-3341	+	16	91266428	91266428	+	3.30208e-08	2.41616e-07	32.9383
775	NM_019835	B4galt5	2437	-33808	-	2	167382985	167382985	+	7.14795e-09	5.90816e-08	33.3824
634	NM_010817	Psmd7	3983	-15754	-	8	107604235	107604235	+	1.9522e-11	2.49289e-10	33.4009
387	NM_001302676	Lair1	3548	-4633	-	7	4067836	4067836	-	1.90613e-10	2.09713e-09	33.4741
268	NM_001171011	Slc14a1	2049	8257	-	18	78133863	78133863	+	2.59187e-09	2.33488e-08	33.7462
570	NM_009690	Cd5l	2555	-31585	+	3	87326296	87326296	-	2.65894e-37	3.37821e-35	34.1046
741	NM_017375	Ostf1	2100	131804	-	19	18500010	18500010	+	3.08781e-07	1.85965e-06	34.1982
354	NM_001290320	Slc26a8	1715	7402	-	17	28682586	28682586	+	3.22401e-07	1.93196e-06	34.2095
895	NM_026792	Agpat5	3833	-18529	+	8	18827750	18827750	+	1.86663e-07	1.17584e-06	34.239
102	NM_001043336	Eml1	868	-6350	+	12	108404283	108404283	-	3.2621e-07	1.95316e-06	34.3309
391	NM_001305940	Arx	4297	-6664	+	X	93279843	93279843	-	9.84345e-29	7.15674e-27	34.3478
559	NM_009527	Wnt7a	3377	10820	-	6	91400550	91400550	+	8.94e-15	1.79845e-13	34.832
1024	NM_053008	Olig3	320	-746	+	10	19355793	19355793	+	2.89448e-06	1.40622e-05	35.6416
9	NM_001005422	Stmnd1	959	26110	+	13	46299829	46299829	-	1.03464e-16	2.6119e-15	35.6531
768	NM_019704	Tmem115	4184	-19705	+	9	107514240	107514240	-	2.6551e-14	5.04663e-13	36.3296
1167	NM_172586	Zfp322a	911	-26235	-	13	23395442	23395442	-	1.58159e-11	2.05366e-10	36.8616
963	NM_029210	Sv2c	1041	20354	-	13	96112224	96112224	-	3.45829e-10	3.63929e-09	37.0836
708	NM_013788	Peg12	3656	-373732	-	7	62838241	62838241	-	8.9094e-08	6.00714e-07	37.212
1321	NM_207233	C1ql2	162	-10822	+	1	120329760	120329760	+	1.40787e-10	1.58322e-09	37.6712
873	NM_026455	Fam32a	3920	-293	+	8	72219437	72219437	+	2.15127e-17	5.7942e-16	37.9671
1256	NM_177735	Tmem130	3218	47402	-	5	144714177	144714177	+	7.10022e-09	5.8716e-08	38.3079
1268	NM_178591	Nrg1	3870	-23	-	8	31918225	31918225	+	7.94033e-76	4.9937e-73	38.3357
637	NM_010867	Myom1	1842	27616	+	17	71047171	71047171	-	3.80945e-08	2.75932e-07	38.6905
40	NM_001024618	Gm1322	2269	30775	+	2	67476775	67476775	+	3.24457e-14	6.09338e-13	39.0441
41	NM_001024618	Xirp2	2269	30775	+	2	67476775	67476775	+	3.24457e-14	6.09338e-13	39.0441
220	NM_001145824	Hipk3	2316	-27000	-	2	104521488	104521488	-	3.5228e-06	1.67794e-05	40.2439
970	NM_029314	1700013F07Rik	2594	2445	+	3	108540027	108540027	+	3.37465e-12	4.85799e-11	40.7629
1190	NM_173414	Lancl3	4226	-41068	+	X	9158905	9158905	+	1.22212e-42	2.07029e-40	41.0386
1313	NM_206534	Churc1	807	3136	+	12	76768707	76768707	-	1.49558e-07	9.62105e-07	41.1111
208	NM_001130458	Tcn2	497	-14038	-	11	3946115	3946115	+	2.58641e-24	1.33056e-22	41.3127
1168	NM_172586	Zfp322a	912	-26241	-	13	23395448	23395448	-	1.66338e-14	3.24249e-13	42.8319
878	NM_026516	Tmem178	1857	32219	+	17	80976849	80976849	-	4.38902e-11	5.30949e-10	44.619
795	NM_021477	Rbfox1	1496	-20818	+	16	5863975	5863975	+	1.10057e-20	4.07447e-19	48.7478

## Sheet: Table_S10_Unique_BSpGTP_DMG_DEG
S.No	Feature name	Genes	logFC	Average expression	t	P-Value	adj.P-Value	q-value	B	Target row	Distance to feature	Feature strand	Chromosome	Start	End	Strand	Methylation difference
Brocolli sprouts (BSp)
1	NM_010225	Foxf2	1.70412	2.73549	4.16029	0.000591221	0.0727497	1.61998e-15	-0.546468	127	-2856	+	13	31622960	31622960	+	-31.3684
2	NM_175696	Pianp	1.80158	5.94595	4.62386	0.000212439	0.0412746	2.98534e-30	0.0669254	476	-1785	+	6	124994935	124994935	+	-27.2942
3	NM_172815	Rspo2	1.83757	-5.08556	4.37614	0.000366534	0.0535865	1.88665e-08	0.207201	176	61622	-	15	43109197	43109197	+	-27.8927
4	NM_053100	Trim8	-0.307449	6.7811	-3.94281	0.000958712	0.0895971	9.30732e-34	-1.46019	287	-46937	+	19	46454711	46454711	-	46.3843
Green tea polyphenols (GTPs)
5	NM_021610	Gpa33	2.47308	-0.27768	4.59884	0.000224428	0.080827	2.52054e-05	0.733445	238	43248	+	1	166173706	166173706	-	25.4107
6	NM_146174	Tcaf2	0.916536	4.62364	4.90523	0.00011498	0.056593	2.32516e-06	1.01991	3298	-2862	-	6	42647902	42647902	-	-29.3651

## Sheet: Table_S11_Comb_DMG
S.No	Feature name	Genes	Target row	Distance to feature	Feature strand	Chromosome	Start	End	Strand	P-Value	q-value	Methylation difference
1	NM_011650	Tsn	130	122771	-	1	118188362	118188362	-	3.2715e-13	6.96674e-12	-41.6
2	NM_001081125	Gli2	131	18544	-	1	119035076	119035076	+	1.46642e-09	1.74483e-08	25.7945
3	NM_001081125	Gli2	132	18523	-	1	119035097	119035097	+	3.25258e-09	3.63355e-08	25.3198
4	NM_207233	C1ql2	133	-14357	+	1	120326225	120326225	+	1.97392e-13	4.33358e-12	25.842
5	NM_207233	C1ql2	134	33721	+	1	120374301	120374301	+	1.07988e-05	5.57596e-05	37.3373
6	NM_010133	En1	136	-1352	+	1	120601135	120601135	-	8.87251e-06	4.6755e-05	-25.2991
7	NM_027677	Gpr39	142	11774	+	1	125688768	125688768	+	5.64879e-07	3.97866e-06	36.3636
8	NM_021380	Il20	147	539	-	1	130910758	130910758	+	0.000106893	0.000413876	-26.1899
9	NM_010548	Il10	148	-9071	+	1	131010774	131010774	+	1.67084e-07	1.32455e-06	28.9196
10	NM_001081209	Prdm14	6	-32983	-	1	13160145	13160145	-	2.3624e-12	4.41534e-11	-26.2643
11	NM_009227	Snrpe	156	61658	-	1	133548623	133548623	+	1.30737e-10	1.86268e-09	-29.5881
12	NM_009227	Snrpe	157	61322	-	1	133548959	133548959	-	1.34933e-12	2.62123e-11	30.5493
13	NM_053106	Lmod1	159	391	+	1	135325202	135325202	+	7.69379e-09	8.00182e-08	33.2422
14	NM_030676	Nr5a2	163	-76813	-	1	137037260	137037260	+	0.00155604	0.0040895	-26.8607
15	NM_177397	Atp6v1g3	164	-25782	+	1	138247956	138247956	-	2.19508e-28	1.9771e-26	38.2353
16	NM_172643	Zbtb41	165	1523	+	1	139423904	139423904	+	4.57286e-19	1.93488e-17	29.3471
17	NM_172643	Zbtb41	166	1541	+	1	139423922	139423922	+	2.39714e-16	7.69195e-15	32.2341
18	NM_001081197	Apobec4	177	-38250	+	1	152712301	152712301	+	2.77077e-05	0.000127305	33.2756
19	NM_010683	Lamc1	178	23847	-	1	153308940	153308940	+	1.69502e-20	8.2738e-19	-26.4659
20	NM_008131	Glul	179	15501	+	1	153915428	153915428	-	1.26522e-21	6.87574e-20	-37.6297
21	NM_177838	Fam163a	185	773	-	1	156204254	156204254	-	8.74091e-12	1.50396e-10	34.1398
22	NM_023141	Tor3a	187	20766	-	1	156653574	156653574	-	4.47681e-09	4.88882e-08	-26.18
23	NM_022312	Tnr	191	28053	+	1	159551820	159551820	+	9.11309e-19	3.7667e-17	-31.0206
24	NM_022312	Tnr	192	82994	+	1	159606761	159606761	+	7.6543e-07	5.20437e-06	26.4377
25	NM_001083897	Mpzl1	197	21608	-	1	165612934	165612934	-	5.32687e-25	3.84769e-23	-53.8198
26	NM_001083897	Mpzl1	198	17517	-	1	165617025	165617025	+	7.62339e-21	3.84062e-19	-34.4297
27	NM_016923	Ly96	10	17127	+	1	16705581	16705581	-	7.83283e-14	1.81586e-12	-28.5617
28	NM_008783	Pbx1	203	99912	-	1	168332258	168332258	+	1.71958e-17	6.28046e-16	40.99
29	NM_008783	Pbx1	204	99904	-	1	168332266	168332266	+	6.86744e-10	8.70875e-09	30.6122
30	NM_010476	Hsd17b7	206	18287	-	1	169950919	169950919	+	1.40268e-05	7.01948e-05	-26.2023
31	NM_019484	Alyref2	207	-4387	+	1	171499091	171499091	+	6.39614e-09	6.76586e-08	31.9876
32	NM_027972	Cfap45	209	1344	+	1	172522472	172522472	+	6.55538e-10	8.34366e-09	32.284
33	NM_007768	Crp	210	-17652	+	1	172680404	172680404	-	2.05734e-13	4.50336e-12	25.6564
34	NM_019445	Fmn2	211	152502	+	1	174654325	174654325	-	2.74937e-07	2.07445e-06	-25.754
35	NM_026626	Efcab2	216	42872	+	1	178448751	178448751	+	3.1893e-13	6.80007e-12	-43.2132
36	NM_145515	Mark1	223	54647	-	1	184944903	184944903	-	1.08543e-08	1.09666e-07	26.1749
37	NM_145515	Mark1	224	54641	-	1	184944909	184944909	-	9.32243e-10	1.15037e-08	28.951
38	NM_146106	Lyplal1	225	-3853	-	1	186121162	186121162	+	1.52978e-29	1.48644e-27	30.5797
39	NM_033077	D1Pas1	228	20750	+	1	186988164	186988164	+	1.076e-09	1.31523e-08	43.2849
40	NM_011935	Esrrg	230	-59234	+	1	187938593	187938593	-	1.35732e-05	6.8255e-05	26.2144
41	NM_016851	Irf6	241	-5708	+	1	193147404	193147404	-	1.15513e-10	1.65994e-09	-35.9468
42	NM_172124	B3gat2	12	-91282	+	1	23670644	23670644	+	0.000306613	0.00102415	-25.1558
43	NM_172124	B3gat2	13	-91254	+	1	23670672	23670672	+	0.000186633	0.000670021	30.9066
44	NM_177235	Bend6	19	10303	-	1	33897319	33897319	+	2.83117e-34	3.75966e-32	-41.6754
45	NM_001289766	Zap70	24	50	+	1	36764563	36764563	+	1.42535e-05	7.11714e-05	-31.0002
46	NM_001290814	Aff3	27	54837	-	1	38572408	38572408	-	4.02938e-10	5.29649e-09	31.2907
47	NM_001029878	Lonrf2	28	-47	-	1	38821261	38821261	+	3.36275e-06	1.97435e-05	-32.7976
48	NM_001252200	Map4k4	32	34092	+	1	39935003	39935003	-	7.05823e-10	8.92012e-09	-31.1494
49	NM_001123382	Il1r1	33	2368	+	1	40268952	40268952	+	1.02406e-13	2.34051e-12	25.5144
50	NM_001033289	Slc9a2	35	-22704	+	1	40659008	40659008	+	1.42801e-13	3.20021e-12	26.0608
51	NM_001177658	Mrpl15	1	76508	-	1	4709219	4709219	-	1.40068e-09	1.67146e-08	26.4
52	NM_001204371	Oprk1	2	90158	+	1	5678649	5678649	+	1.06305e-05	5.49838e-05	29.4456
53	NM_139146	Satb2	55	139329	-	1	56832006	56832006	-	9.79236e-09	9.98517e-08	-29.2573
54	NM_001198570	Abi2	59	10243	+	1	60419860	60419860	-	6.85324e-06	3.73022e-05	-33.1029
55	NM_033563	Klf7	69	13603	-	1	64107787	64107787	+	1.01544e-64	5.15583e-62	-30.266
56	NM_025964	Mettl21a	70	2905	-	1	64614264	64614264	+	1.78089e-09	2.08623e-08	-37.9611
57	NM_001244692	St18	3	29354	+	1	6516583	6516583	-	5.16941e-05	0.000220258	-27.1087
58	NM_001045533	Marchf4	73	57286	-	1	72479279	72479279	+	6.79272e-06	3.6996e-05	-26.6214
59	NM_001045533	Marchf4	74	56951	-	1	72479614	72479614	-	0.000660642	0.00197516	-25.8078
60	NM_010518	Igfbp5	77	18493	-	1	72856373	72856373	+	2.08827e-09	2.42034e-08	-27.6793
61	NM_010518	Igfbp5	78	16348	-	1	72858518	72858518	+	4.51582e-11	6.91937e-10	-34.6448
62	NM_009509	Vil1	80	17231	+	1	74426613	74426613	-	9.49949e-07	6.33504e-06	-33.4921
63	NM_153744	Prkag3	81	11753	-	1	74737203	74737203	-	4.06441e-09	4.47e-08	-45.5353
64	NM_023732	Abcb6	83	-1627	-	1	75182018	75182018	+	1.92088e-10	2.66281e-09	29.5455
65	NM_008781	Pax3	94	115062	-	1	78082075	78082075	+	1.21906e-22	7.34986e-21	25.7569
66	NM_001004173	Sgpp2	95	12807	+	1	78323151	78323151	+	3.46154e-08	3.16513e-07	-26.1731
67	NM_027921	Slc16a14	101	5305	-	1	84929779	84929779	+	9.71223e-18	3.66616e-16	-25.6451
68	NM_029122	Iqca	111	36973	-	1	90116429	90116429	-	9.97614e-11	1.45067e-09	33.1798
69	NM_001243008	Col6a3	115	18786	-	1	90825186	90825186	+	2.32963e-07	1.78691e-06	-30.4927
70	NM_001294150	Kif1a	120	11765	-	1	93070716	93070716	-	5.53746e-43	1.18506e-40	50.6167
71	NM_001205098	Mgat4c	347	-166234	+	10	101515253	101515253	+	2.38733e-24	1.65294e-22	-31.8842
72	NM_001205098	Mgat4c	348	-166233	+	10	101515254	101515254	-	1.4316e-15	4.19121e-14	-46.0718
73	NM_001205098	Mgat4c	349	-50301	+	10	101631186	101631186	+	2.78879e-28	2.4945e-26	-36.033
74	NM_026223	Glipr1l2	358	36575	+	10	112119927	112119927	+	6.84804e-07	4.71435e-06	-30.7879
75	NM_173391	Tph2	362	11263	-	10	115173760	115173760	-	1.19582e-11	2.01272e-10	28.7248
76	NM_080446	Helb	378	37549	-	10	120075417	120075417	+	1.64963e-17	6.05267e-16	-39.0637
77	NM_182807	Tafa2	386	38242	+	10	123302316	123302316	+	1.18769e-08	1.1922e-07	-35.3171
78	NM_001011797	Olfr782	396	6967	+	10	129357530	129357530	-	1.74836e-14	4.39765e-13	-38.1518
79	NM_001103366	Vmn2r87	397	-46793	-	10	130544171	130544171	-	1.74262e-06	1.09434e-05	-25.6648
80	NM_001195065	Phactr2	251	35758	-	10	13438639	13438639	+	1.78722e-16	5.80678e-15	33.6284
81	NM_008703	1700016L04Rik	252	171507	+	10	14931794	14931794	+	1.25024e-08	1.24687e-07	30.5405
82	NM_008703	Nmbr	252	171507	+	10	14931794	14931794	+	1.25024e-08	1.24687e-07	30.5405
83	NM_178713	Aldh8a1	256	77985	+	10	21455283	21455283	-	1.99583e-08	1.91592e-07	-27.381
84	NM_029881	Tmem200a	264	-7854	-	10	26086905	26086905	+	4.63193e-13	9.67289e-12	-29.7693
85	NM_013904	Hey2	266	-1484	-	10	30844266	30844266	+	0.000202905	0.000720252	26.5546
86	NM_007444	Amd2	270	278502	-	10	35433390	35433390	-	1.11115e-08	1.12155e-07	35.3675
87	NM_007444	Amd2	271	151259	-	10	35560633	35560633	+	3.80599e-07	2.78054e-06	26.0734
88	NM_177793	Mettl24	275	98527	+	10	40781807	40781807	+	1.76723e-10	2.46831e-09	-40.0422
89	NM_001277230	Zbtb24	276	-670	+	10	41449688	41449688	+	2.37519e-12	4.43764e-11	-37.6242
90	NM_001031772	Lin28b	287	-2134	-	10	45472334	45472334	-	1.43052e-10	2.027e-09	-27.0183
91	NM_022027	Syne1	242	158067	-	10	4910997	4910997	+	2.06367e-17	7.47397e-16	-27.3231
92	NM_019760	Serinc1	294	-36984	-	10	57569512	57569512	+	9.16967e-20	4.16943e-18	-32.7941
93	NM_011240	Ranbp2	296	-12895	+	10	58433957	58433957	-	2.43722e-08	2.3e-07	-25.5022
94	NM_010959	Oit3	298	-6317	-	10	59448095	59448095	+	4.28143e-09	4.69381e-08	30.251
95	NM_025273	Pcbd1	301	-11912	+	10	61077419	61077419	+	2.97991e-09	3.35208e-08	-33.658
96	NM_026095	Snrpd3	316	1004	+	10	75519044	75519044	-	4.61726e-07	3.31102e-06	25.4182
97	NM_008185	Gstt1	318	-643	-	10	75799226	75799226	+	6.67091e-09	7.0278e-08	44.5672
98	NM_023219	Slc5a4b	319	-11543	-	10	76122560	76122560	-	3.61222e-10	4.79194e-09	25.4808
99	NM_133184	Slc5a4a	320	24553	+	10	76172002	76172002	-	1.32068e-07	1.06805e-06	25.978
100	NM_009933	Col6a1	321	441	-	10	76725604	76725604	+	4.71056e-10	6.1389e-09	45.0947
101	NM_130455	Grin3b	325	-105	+	10	79970619	79970619	-	2.12819e-06	1.30964e-05	25.8734
102	NM_001081688	Tmprss9	327	9016	+	10	80888830	80888830	+	1.57003e-07	1.25172e-06	-26.6472
103	NM_021501	Pias4	328	13694	-	10	81154027	81154027	-	1.07168e-12	2.1176e-11	-25.4258
104	NM_026579	D10Wsu102e	329	-600	+	10	83359621	83359621	+	2.88667e-08	2.68838e-07	-26.7267
105	NM_001004363	Nuak1	331	-17216	-	10	84457686	84457686	-	1.95524e-29	1.87175e-27	27.4542
106	NM_008777	Pah	333	84750	+	10	87606543	87606543	+	1.02363e-20	5.10238e-19	-43.3245
107	NM_011461	Spic	334	-5402	-	10	88688424	88688424	-	1.00186e-10	1.45514e-09	-34.4472
108	NM_001190451	Dcn	342	-22228	+	10	97457272	97457272	+	1.29601e-14	3.31786e-13	27.9482
109	NM_001190451	Dcn	343	-21674	+	10	97457826	97457826	+	1.73253e-09	2.03372e-08	-30.6829
110	NM_026551	Dcakd	549	1297	-	11	103015851	103015851	+	2.23361e-08	2.12177e-07	-34.2326
111	NM_009598	Ace	552	2328	+	11	105977534	105977534	+	6.68383e-12	1.16578e-10	29.5434
112	NM_009598	Ace	553	2350	+	11	105977556	105977556	+	5.22958e-11	7.97292e-10	29.1463
113	NM_133199	Scn4a	554	-7465	-	11	106356854	106356854	-	6.46466e-07	4.48861e-06	-34.2347
114	NM_001305157	Pecam1	555	1759	-	11	106713523	106713523	-	9.0438e-10	1.11892e-08	32.2967
115	NM_025894	Psmd12	557	23482	+	11	107503008	107503008	-	3.12243e-39	5.59552e-37	-28.5382
116	NM_008425	Kcnj2	562	50743	+	11	111116905	111116905	+	1.4993e-21	8.04652e-20	34.9518
117	NM_010254	Galr2	571	12293	+	11	116293230	116293230	+	1.02064e-07	8.47511e-07	35.2937
118	NM_027919	Tha1	576	-35973	-	11	117909498	117909498	-	1.25857e-05	6.38659e-05	32.565
119	NM_027919	Tha1	577	-36014	-	11	117909539	117909539	-	7.05138e-08	6.05223e-07	38.0825
120	NM_001285438	Rbfox3	578	67901	-	11	118693141	118693141	-	6.94641e-05	0.000285717	25.8195
121	NM_009734	Cep131	583	1194	-	11	120085634	120085634	-	2.13142e-07	1.64904e-06	-25.0291
122	NM_001177629	Grb10	410	16160	-	11	12011812	12011812	+	1.13802e-05	5.83721e-05	25.8395
123	NM_030207	Sfi1	398	109	-	11	3193355	3193355	+	2.64223e-16	8.42617e-15	-40.9865
124	NM_011856	Tenm2	437	64332	-	11	36879910	36879910	+	2.99955e-08	2.78e-07	35.7706
125	NM_011856	Tenm2	438	64301	-	11	36879941	36879941	+	7.19359e-05	0.000294488	28.6405
126	NM_001130458	Tcn2	399	-14038	-	11	3946115	3946115	+	5.28957e-25	3.82608e-23	39.7481
127	NM_001029937	Sec14l3	400	-8835	+	11	4056018	4056018	+	2.59905e-07	1.97368e-06	-29.8531
128	NM_144520	Sec14l2	401	2710	-	11	4116020	4116020	-	2.24261e-19	9.83444e-18	-49.8006
129	NM_207253	Olfr1371	455	8096	-	11	52205892	52205892	+	1.8289e-10	2.54826e-09	-27.8665
130	NM_026080	Mrps24	405	7991	-	11	5699709	5699709	-	2.20047e-08	2.09452e-07	-32.8451
131	NM_207230	Olfr320	465	4604	+	11	58688477	58688477	-	1.58112e-17	5.83234e-16	40.8899
132	NM_008088	Gas7	482	-8285	+	11	67524713	67524713	-	1.40131e-09	1.67182e-08	26.9906
133	NM_025915	Tmem88	486	-1494	-	11	69399727	69399727	-	2.30755e-17	8.3107e-16	26.2326
134	NM_153081	Slc16a11	488	-20673	+	11	70193237	70193237	+	1.91093e-05	9.19427e-05	26.138
135	NM_007528	Bcl6b	489	3042	-	11	70226757	70226757	-	3.24495e-08	2.98607e-07	25.8537
136	NM_001302475	Pld2	490	4347	+	11	70544617	70544617	-	0.00017376	0.000630581	-26.9751
137	NM_177709	Trarg1	493	20635	+	11	76700506	76700506	+	5.63254e-16	1.73119e-14	46.6778
138	NM_007754	Cpd	494	38509	-	11	76808500	76808500	+	0.000305566	0.00102151	29.7585
139	NM_001284228	Flot2	495	4079	+	11	78044381	78044381	-	1.03021e-15	3.06636e-14	-40.3495
140	NM_001313922	Nos2	496	5956	+	11	78931245	78931245	+	5.47261e-09	5.86562e-08	35.0732
141	NM_018776	Crlf3	497	4598	-	11	80076394	80076394	-	5.5493e-21	2.84272e-19	-31.1949
142	NM_001005223	Znhit3	505	-10395	-	11	84926750	84926750	+	4.1924e-20	1.96671e-18	-35.5014
143	NM_001029934	Usp32	506	7633	-	11	85132323	85132323	+	1.11784e-10	1.60948e-09	30.6131
144	NM_009324	Tbx2	508	1243	+	11	85833856	85833856	-	5.92357e-66	3.13043e-63	-25.5261
145	NM_172798	Tbx4	509	49052	+	11	85945815	85945815	+	1.37005e-06	8.83843e-06	27.5771
146	NM_001168472	Dynll2	517	22841	-	11	87963745	87963745	-	5.078e-35	7.05067e-33	27.4275
147	NM_172534	Ankfn1	520	-87663	-	11	89506610	89506610	+	5.26299e-17	1.83302e-15	39.9819
148	NM_199008	Cox11	521	15859	+	11	90654041	90654041	+	1.03098e-18	4.24104e-17	40.7505
149	NM_199008	Cox11	522	15884	+	11	90654066	90654066	+	2.08772e-20	1.00861e-18	42.931
150	NM_178259	Abca13	406	34398	+	11	9226338	9226338	+	2.12398e-17	7.68163e-16	38.6733
151	NM_007689	Chad	526	-927	+	11	94564147	94564147	+	6.12395e-10	7.8311e-09	25.2808
152	NM_133807	Lrrc59	527	1279	+	11	94631101	94631101	+	9.74345e-32	1.07365e-29	33.9494
153	NM_008267	Hoxb13	532	-480	+	11	96193881	96193881	+	4.50189e-13	9.41273e-12	27.6634
154	NM_028965	Snx11	536	41332	-	11	96736224	96736224	+	1.74233e-07	1.37491e-06	28.8851
155	NM_028965	Snx11	537	41313	-	11	96736243	96736243	+	1.91068e-07	1.49365e-06	25.8359
156	NM_008379	Kpnb1	540	-18814	-	11	97206705	97206705	-	3.44126e-05	0.000154052	-26.3736
157	NM_010895	Neurod2	542	3195	-	11	98326451	98326451	-	1.09863e-116	1.89661e-113	47.1492
158	NM_010895	Neurod2	543	3184	-	11	98326462	98326462	-	7.53761e-62	3.45463e-59	-32.3636
159	NM_027574	Krt28	546	1020	-	11	99373884	99373884	-	2.3554e-30	2.39188e-28	40.2941
160	NM_008947	Psmc1	683	-2132	+	12	100108070	100108070	+	8.27863e-121	1.53125e-117	-45.9165
161	NM_001290303	Nrde2	684	9516	-	12	100150138	100150138	-	3.93309e-06	2.27262e-05	-28.0246
162	NM_211355	Ppp4r3a	686	-14308	-	12	101098009	101098009	+	4.38992e-15	1.18971e-13	28.6226
163	NM_133364	Prima1	692	82047	-	12	103160100	103160100	-	8.48143e-20	3.87691e-18	26.8056
164	NM_133364	Prima1	693	74036	-	12	103168111	103168111	+	1.7193e-33	2.156e-31	-30.1459
165	NM_001195726	Fam181a	694	2143	+	12	103317100	103317100	+	5.82664e-11	8.81057e-10	29.4118
166	NM_007539	Bdkrb1	699	1340	+	12	105605429	105605429	+	2.66441e-11	4.25632e-10	28.1409
167	NM_001043336	Eml1	706	-6350	+	12	108404283	108404283	-	2.72347e-12	5.05913e-11	41.2698
168	NM_001098168	Asap2	598	27052	+	12	21138806	21138806	+	6.58262e-07	4.55341e-06	-28.7523
169	NM_145890	Grhl1	599	9067	+	12	24589784	24589784	+	3.93029e-11	6.09067e-10	26.28
170	NM_172253	Polr1f	603	177719	+	12	33607341	33607341	+	1.11748e-07	9.19665e-07	-26.6626
171	NM_033522	Ferd3l	604	-121120	+	12	33807305	33807305	-	1.72742e-15	4.95366e-14	45.2327
172	NM_001289503	Crppa	606	125409	+	12	36507554	36507554	-	5.09554e-14	1.2111e-12	-32.9886
173	NM_001278584	Pomc	587	-23558	+	12	3931387	3931387	-	1.14221e-08	1.15088e-07	27.4227
174	NM_001278584	Pomc	588	-11992	+	12	3942953	3942953	-	1.0862e-09	1.32676e-08	-28.2064
175	NM_198111	Akap6	617	1131	+	12	52700512	52700512	-	7.59346e-06	4.07868e-05	28.879
176	NM_198111	Akap6	618	1150	+	12	52700531	52700531	+	2.55624e-07	1.94462e-06	26.6665
177	NM_198111	Akap6	619	1151	+	12	52700532	52700532	-	4.54429e-14	1.08656e-12	46.5342
178	NM_198111	Akap6	620	1190	+	12	52700571	52700571	+	3.08729e-11	4.87324e-10	33.7937
179	NM_009147	Sec23a	627	158951	-	12	58853067	58853067	-	1.2659e-11	2.12171e-10	29.7785
180	NM_009147	Sec23a	628	87900	-	12	58924118	58924118	-	4.58049e-05	0.000198315	26.4188
181	NM_001025605	Gm527	630	-163979	+	12	64753932	64753932	-	7.9643e-11	1.17849e-09	-37.7073
182	NM_011384	Six6	636	11770	+	12	72951650	72951650	+	2.22452e-13	4.84679e-12	-45.5968
183	NM_009189	Six1	637	4246	-	12	73042467	73042467	+	5.26735e-07	3.73284e-06	-32.0911
184	NM_009189	Six1	638	-5206	-	12	73051917	73051917	-	4.05839e-10	5.33192e-09	-32.3731
185	NM_172805	Kcnh5	645	15829	-	12	75161504	75161504	+	9.81369e-07	6.52274e-06	-25.0275
186	NM_023275	Rhoj	646	46275	+	12	75354586	75354586	+	4.84337e-07	3.45746e-06	30.0481
187	NM_207707	Esr2	647	48245	-	12	76129015	76129015	-	9.84723e-13	1.95796e-11	29.0839
188	NM_013675	Sptb	651	-23248	-	12	76733794	76733794	-	1.74009e-14	4.37898e-13	30.8333
189	NM_009705	Arg2	656	772	+	12	79131558	79131558	+	1.12767e-07	9.26426e-07	27.7778
190	NM_026244	Slc39a9	660	7308	+	12	80651521	80651521	+	6.8164e-05	0.000281248	-33.9877
191	NM_001309808	Cox16	661	-284	-	12	81485420	81485420	-	1.83054e-23	1.17768e-21	-42.3171
192	NM_001267625	Dpf3	664	176861	-	12	83310876	83310876	+	3.15329e-08	2.90948e-07	25.8081
193	NM_001205343	Papln	665	6873	+	12	83770505	83770505	+	9.33485e-08	7.82412e-07	36.1364
194	NM_001301427	Vsx2	668	1154	+	12	84570980	84570980	+	1.01801e-08	1.03337e-07	25.637
195	NM_016767	Batf	669	-23860	+	12	85662860	85662860	+	2.43983e-22	1.41816e-20	-32.8157
196	NM_011648	Tshr	673	5841	+	12	91406832	91406832	+	8.6656e-10	1.07753e-08	27.2177
197	NM_001190264	Mrps36	865	-3434	-	13	100748092	100748092	+	1.32493e-13	2.98601e-12	-40.1721
198	NM_025751	Nt5el	867	69722	+	13	105151842	105151842	+	3.69592e-07	2.71199e-06	-32.1295
199	NM_021459	Isl1	881	588563	-	13	115721126	115721126	+	0.000198045	0.000705418	25.5128
200	NM_021459	Isl1	882	8011	-	13	116301678	116301678	-	2.1725e-10	2.9908e-09	-33.6122
201	NM_021459	Isl1	883	7954	-	13	116301735	116301735	-	2.36046e-07	1.80841e-06	-27.7376
202	NM_001308506	Nnt	886	176612	-	13	119232646	119232646	+	4.22072e-15	1.14626e-13	-27.792
203	NM_001177666	Tmem267	887	-104	+	13	119488756	119488756	+	3.41213e-13	7.24834e-12	-42.81
204	NM_023685	Zkscan3	731	-11963	-	13	21414717	21414717	+	3.37232e-09	3.75355e-08	-27.5724
205	NM_001162929	Pom121l2	732	922	+	13	21982114	21982114	+	1.25483e-05	6.37074e-05	-27.8465
206	NM_001166709	Vmn1r207	733	20631	-	13	22705992	22705992	+	1.92943e-20	9.38309e-19	-28.2823
207	NM_178187	H2ac8	734	1406	-	13	23569815	23569815	+	4.21654e-06	2.41859e-05	28.9198
208	NM_175658	H2ac1	735	14811	+	13	23949271	23949271	+	9.54074e-140	2.74509e-136	-41.3599
209	NM_011165	Prl4a1	739	18993	+	13	28035214	28035214	+	1.375e-12	2.66709e-11	-28.6976
210	NM_013674	Irf4	743	12143	+	13	30761399	30761399	-	6.19753e-17	2.14123e-15	37.755
211	NM_013674	Irf4	744	33219	+	13	30782475	30782475	+	2.50597e-05	0.000116513	25.5981
212	NM_010225	Foxf2	746	-2856	+	13	31622960	31622960	+	1.83993e-12	3.49817e-11	-32.2654
213	NM_010225	Foxf2	747	-1759	+	13	31624057	31624057	-	1.5401e-64	7.66939e-62	-37.0028
214	NM_008592	Foxc1	748	-26588	+	13	31780058	31780058	-	6.83045e-07	4.70662e-06	25.6296
215	NM_008592	Foxc1	749	-2525	+	13	31804121	31804121	-	2.61465e-07	1.98407e-06	40.8651
216	NM_007556	Bmp6	753	-32659	+	13	38313057	38313057	+	7.44432e-22	4.12786e-20	45.3681
217	NM_007556	Bmp6	754	-26208	+	13	38319508	38319508	+	0.000216208	0.000760231	26.5116
218	NM_025380	Eef1e1	755	-7117	-	13	38666144	38666144	+	8.32832e-14	1.92681e-12	-41.7872
219	NM_001047159	Net1	720	279	-	13	3893303	3893303	+	8.55485e-08	7.22649e-07	30.5772
220	NM_001047159	Net1	721	244	-	13	3893338	3893338	+	5.82462e-11	8.81009e-10	30.1887
221	NM_134072	Akr1c14	722	-8211	+	13	4051380	4051380	+	7.62067e-09	7.94114e-08	-28.7415
222	NM_017464	Nedd9	758	17133	-	13	41341869	41341869	-	6.83364e-11	1.02022e-09	25.6486
223	NM_013778	Akr1c13	723	20751	+	13	4211936	4211936	-	1.32304e-10	1.88398e-09	-30.3534
224	NM_001302636	Phactr1	762	-78109	+	13	42788138	42788138	-	3.81003e-13	8.05395e-12	26.7083
225	NM_001005748	Phactr1	764	12252	+	13	43135089	43135089	+	1.33879e-10	1.90432e-09	-29.0027
226	NM_013777	Akr1c12	724	-39794	-	13	4319192	4319192	+	6.27594e-12	1.09808e-10	-27.1075
227	NM_001005422	Stmnd1	778	26110	+	13	46299829	46299829	-	1.21952e-10	1.74665e-09	29.9886
228	NM_001290313	Wnk2	783	9379	-	13	49138950	49138950	-	4.16731e-69	2.53912e-66	-49.2261
229	NM_015759	Fgd3	784	-3385	-	13	49312592	49312592	-	9.24508e-10	1.14218e-08	-35.9516
230	NM_172015	Iars	785	-540	+	13	49681590	49681590	-	2.13184e-06	1.31142e-05	29.7554
231	NM_001024474	Diras2	792	74005	-	13	52456832	52456832	-	1.01761e-19	4.60281e-18	-52.2608
232	NM_013846	Ror2	798	10832	-	13	53275278	53275278	+	5.73412e-09	6.12184e-08	-34.6514
233	NM_009946	Cplx2	801	44293	+	13	54415640	54415640	+	3.50837e-99	5.1914e-96	-29.272
234	NM_008739	Nsd1	803	-5872	+	13	55203910	55203910	+	1.41918e-05	7.09041e-05	-28.8099
235	NM_001302373	Trpc7	811	67875	-	13	56827915	56827915	-	1.34447e-08	1.33238e-07	-39.7151
236	NM_001166464	Spock1	814	230101	-	13	57678232	57678232	-	4.79925e-44	1.07135e-41	-28.4009
237	NM_001166464	Spock1	815	39735	-	13	57868598	57868598	+	4.61311e-11	7.06008e-10	-32.546
238	NM_001166464	Spock1	816	39710	-	13	57868623	57868623	+	3.8264e-12	6.92658e-11	-28.7291
239	NM_001166464	Spock1	817	7499	-	13	57900834	57900834	-	3.3761e-05	0.000151581	27.4893
240	NM_022317	Slc28a3	819	13036	-	13	58597842	58597842	-	5.18996e-18	2.00439e-16	-44.7092
241	NM_027344	Ctsll3	824	-9145	-	13	60811988	60811988	+	3.67939e-37	6.06866e-35	25.7127
242	NM_001039239	Zfp808	826	-10287	+	13	62119603	62119603	+	8.60545e-32	9.56388e-30	-32.2102
243	NM_001289924	Aopep	828	-7250	+	13	62957643	62957643	-	8.94003e-39	1.58022e-36	43.1572
244	NM_001289924	Aopep	829	-6467	+	13	62958426	62958426	-	2.59562e-06	1.56293e-05	-30.6536
245	NM_198322	Zfp273	832	4795	+	13	67818609	67818609	+	8.03153e-08	6.81779e-07	25.077
246	NM_198600	Tent4a	833	39401	-	13	69494464	69494464	+	3.72229e-07	2.72901e-06	-25.5782
247	NM_010020	Slc6a3	840	28885	+	13	73565630	73565630	+	6.16351e-06	3.39873e-05	-27.5108
248	NM_138953	Ell2	842	5954	+	13	75713436	75713436	-	0.00100641	0.00282703	26.7483
249	NM_009321	Tbca	853	-23136	+	13	94765807	94765807	+	1.14093e-18	4.66368e-17	28.7166
250	NM_001170669	Pde8b	854	15538	-	13	95207513	95207513	+	6.63018e-10	8.43058e-09	28.1766
251	NM_010169	F2r	855	32987	-	13	95585447	95585447	-	2.1427e-08	2.04366e-07	25.7392
252	NM_010422	Hexb	857	-11231	-	13	97209587	97209587	-	2.01845e-07	1.56913e-06	-29.1176
253	NM_178918	Utp15	858	23873	-	13	98239120	98239120	+	2.82732e-16	8.98325e-15	-55.5116
254	NM_026685	Tmem174	859	10567	-	13	98626844	98626844	+	5.62358e-07	3.9636e-06	-25.469
255	NM_026685	Tmem174	860	10459	-	13	98626952	98626952	-	1.22895e-10	1.75919e-09	-29.3578
256	NM_026685	Tmem174	861	10452	-	13	98626959	98626959	-	5.61613e-07	3.95943e-06	-28.2609
257	NM_016723	Uchl3	999	5852	+	14	101659817	101659817	-	9.208e-27	7.58161e-25	-39.1449
258	NM_007904	Ednrb	1005	27847	-	14	103815855	103815855	+	2.51837e-07	1.9186e-06	-29.7783
259	NM_199065	Slitrk1	1011	-128706	-	14	109042944	109042944	+	3.47353e-10	4.61622e-09	-29.2833
260	NM_175499	Slitrk6	1013	43567	-	14	110711583	110711583	+	1.44968e-12	2.79936e-11	-36.5002
261	NM_001163675	Abcc4	1025	11444	-	14	118665488	118665488	+	3.85396e-20	1.81617e-18	-44.2217
262	NM_015820	Hs6st3	1027	112302	+	14	119250565	119250565	+	2.47958e-08	2.33784e-07	-30.1471
263	NM_001001490	Oxgr1	1028	6486	-	14	120035950	120035950	+	0.000121148	0.000461749	-26.7078
264	NM_001001490	Oxgr1	1029	-26858	-	14	120069292	120069292	-	1.05409e-09	1.29089e-08	-31.2946
265	NM_001001490	Oxgr1	1030	-40755	-	14	120083189	120083189	-	5.37576e-14	1.27478e-12	-28.8095
266	NM_207667	Fgf14	1038	335	-	14	124676793	124676793	+	2.91844e-08	2.71309e-07	27.3537
267	NM_025550	Psmd6	891	-14227	-	14	14135130	14135130	+	6.78117e-09	7.1367e-08	-29.1026
268	NM_010420	Hesx1	905	13734	+	14	27014094	27014094	-	1.71488e-12	3.27968e-11	-36.4035
269	NM_009524	Wnt5a	907	-210396	+	14	28295077	28295077	-	3.73331e-62	1.75771e-59	-41.6166
270	NM_175343	Chdh	914	107658	+	14	30130289	30130289	+	1.42229e-06	9.13789e-06	26.1494
271	NM_027088	Bap1	915	691	+	14	31252178	31252178	-	2.82739e-08	2.63839e-07	35.102
272	NM_001146022	Wdfy4	919	14478	-	14	33170589	33170589	+	4.60608e-19	1.94734e-17	27.5524
273	NM_013473	Anxa8	920	225	+	14	34086202	34086202	+	1.40591e-19	6.31504e-18	41.041
274	NM_008166	Grid1	921	4822	+	14	34824956	34824956	-	2.89643e-15	8.06918e-14	-27.5973
275	NM_029238	Slc35f4	937	131390	-	14	49394448	49394448	-	6.1387e-06	3.38685e-05	-32.9682
276	NM_146667	Olfr740	938	-2706	+	14	50450348	50450348	+	4.22178e-41	8.28205e-39	-26.2978
277	NM_029145	Rnase10	939	-8	+	14	51007921	51007921	+	1.55444e-10	2.18822e-09	36.3783
278	NM_030098	Rnase6	940	6656	+	14	51135722	51135722	-	6.4534e-11	9.68199e-10	33.7585
279	NM_015803	Atp8a2	949	64019	-	14	60022816	60022816	+	2.17256e-09	2.5093e-08	26.4758
280	NM_011446	Sox7	959	-1211	+	14	63942495	63942495	-	9.79778e-08	8.16851e-07	-34.6396
281	NM_028903	Scara5	961	51670	+	14	65718071	65718071	+	6.23176e-07	4.34203e-06	29.4914
282	NM_016903	Esd	967	-25779	+	14	74706518	74706518	+	2.93838e-14	7.19025e-13	-31.2714
283	NM_019775	Cpb2	969	14057	+	14	75256342	75256342	+	2.91761e-31	3.13492e-29	35.1931
284	NM_026083	Zc3h13	970	47649	+	14	75332020	75332020	+	2.15825e-11	3.50294e-10	-28.6961
285	NM_026816	Gtf2f2	975	3031	-	14	76007835	76007835	+	3.74252e-18	1.47172e-16	32.4713
286	NM_001081336	Dgkh	984	13319	-	14	78711771	78711771	+	8.15484e-07	5.51005e-06	-31.9559
287	NM_027782	Kctd6	888	-7492	+	14	8206589	8206589	+	1.07266e-07	8.86441e-07	26.3406
288	NM_007826	Dach1	993	441776	-	14	97727990	97727990	+	1.12889e-20	5.59479e-19	-27.6407
289	NM_001081471	Mettl7a3	1203	566	+	15	100335493	100335493	+	2.34921e-05	0.000110065	-31.4056
290	NM_033612	Cela1	1206	8978	-	15	100678943	100678943	+	2.92649e-07	2.19434e-06	-31.6197
291	NM_146064	Soat2	1210	8444	+	15	102159017	102159017	-	8.70332e-09	8.95758e-08	28.2129
292	NM_010464	Hoxc13	1211	-45822	+	15	102875309	102875309	-	6.27618e-09	6.65116e-08	-32.8482
293	NM_010466	Hoxc8	1212	3125	+	15	102993662	102993662	+	5.6273e-22	3.14728e-20	-35.6475
294	NM_013553	Hoxc4	1215	222	+	15	103034615	103034615	+	3.39768e-10	4.52587e-09	-27.451
295	NM_001314041	Itga5	1219	1228	-	15	103365564	103365564	-	8.98794e-07	6.02415e-06	-29.8951
296	NM_133365	Dnah5	1067	41194	+	15	28244958	28244958	+	5.04256e-09	5.45321e-08	43.6386
297	NM_001085421	Tspyl5	1075	7371	-	15	33680513	33680513	+	4.36373e-07	3.14585e-06	34.0906
298	NM_001085421	Tspyl5	1076	-24071	-	15	33711953	33711953	+	3.46407e-07	2.55963e-06	-29.9917
299	NM_026521	Zfp706	1080	14643	-	15	36992760	36992760	-	0.00111741	0.00308807	-25.6839
300	NM_001163138	Card6	1040	3283	-	15	5105251	5105251	-	6.11502e-11	9.20918e-10	-29.9093
301	NM_027212	Med30	1091	9197	+	15	52721640	52721640	-	2.90675e-06	1.73056e-05	29.1421
302	NM_024207	Derl1	1096	22722	-	15	57869697	57869697	+	6.44841e-22	3.59101e-20	48.5391
303	NM_001291903	Adcy8	1100	-111090	-	15	65033385	65033385	-	3.54122e-09	3.92551e-08	-33.4801
304	NM_001291903	Adcy8	1101	-112117	-	15	65034412	65034412	-	9.2864e-13	1.85506e-11	35.1307
305	NM_001145096	Hhla1	1102	-1807	-	15	65978610	65978610	-	1.95834e-12	3.70967e-11	-36.0913
306	NM_198119	Lrrc24	1118	222	-	15	76721952	76721952	+	0.000345385	0.00113377	30.6768
307	NM_001007568	Zfp251	1119	21408	-	15	76850028	76850028	+	5.64261e-06	3.13923e-05	-26.0284
308	NM_022410	Myh9	1120	-21521	-	15	77863695	77863695	+	1.35716e-17	5.03853e-16	-28.2869
309	NM_007583	Cacng2	1121	48679	-	15	78070602	78070602	-	1.52775e-09	1.8085e-08	-31.783
310	NM_011437	Sox10	1125	274	-	15	79164217	79164217	-	1.117e-09	1.36084e-08	-29.0156
311	NM_011437	Sox10	1126	236	-	15	79164255	79164255	-	3.21004e-07	2.38725e-06	-30.9762
312	NM_028763	Cbx6	1128	-11181	-	15	79845513	79845513	+	0.00020369	0.000722593	25.8298
313	NM_175109	Rps19bp1	1131	-5664	-	15	80269969	80269969	+	3.79079e-06	2.19653e-05	-27.2059
314	NM_010815	Grap2	1132	6793	+	15	80630274	80630274	-	6.9929e-07	4.80131e-06	-31.9771
315	NM_010815	Grap2	1133	6818	+	15	80630299	80630299	+	2.72776e-17	9.72939e-16	-30.4792
316	NM_011399	Slc25a17	1135	53712	-	15	81307054	81307054	+	8.67336e-05	0.000346413	-32.3757
317	NM_020507	Tob2	1137	3237	-	15	81855090	81855090	+	5.26316e-10	6.79918e-09	-31.0359
318	NM_020507	Tob2	1138	-1335	-	15	81859660	81859660	+	1.35444e-07	1.09416e-06	25.414
319	NM_020507	Tob2	1139	-1377	-	15	81859702	81859702	+	1.46655e-09	1.74483e-08	31.1973
320	NM_011482	Snu13	1141	13762	-	15	82033837	82033837	-	5.33502e-08	4.7022e-07	25.4943
321	NM_145476	Tbc1d22a	1152	833	+	15	86215290	86215290	-	0.000194509	0.000694494	-27.6542
322	NM_027306	Zdhhc25	1157	20190	+	15	88620490	88620490	+	1.37486e-05	6.89999e-05	26.9767
323	NM_031260	Mov10l1	1159	458	+	15	88983450	88983450	+	2.16276e-06	1.32807e-05	-39.1191
324	NM_001163319	Tubgcp6	1160	15199	-	15	89107952	89107952	+	5.15834e-07	3.6611e-06	-38.2393
325	NM_001033441	Alg10b	1164	-76823	+	15	90147488	90147488	+	1.72396e-06	1.0842e-05	-28.184
326	NM_198927	Smgc	1168	47396	+	15	91885722	91885722	-	0.000103365	0.000402864	-29.5113
327	NM_001164594	Pdzrn4	1169	86208	+	15	92683315	92683315	+	2.68876e-05	0.000124043	-27.9089
328	NM_001164594	Pdzrn4	1170	117408	+	15	92714515	92714515	+	6.99985e-14	1.63741e-12	-34.6364
329	NM_001164594	Pdzrn4	1171	157468	+	15	92754575	92754575	+	1.17719e-18	4.80812e-17	-36.9675
330	NM_207533	Dbx2	1180	-46701	-	15	95701471	95701471	-	0.000296259	0.0009958	26.1369
331	NM_175121	Slc38a2	1187	8576	-	15	96691123	96691123	+	5.20154e-15	1.39291e-13	-36.4806
332	NM_146457	Olfr282	1197	-11960	+	15	98425510	98425510	-	0.00375047	0.00855783	25.3501
333	NM_001001807	Olfr279	1198	-1484	+	15	98495990	98495990	+	9.68808e-07	6.44752e-06	-25.8029
334	NM_029236	Bcdin3d	1201	3134	-	15	99471597	99471597	-	9.1802e-05	0.000363767	-25.6591
335	NM_001284522	Larp4	1202	-9249	+	15	99960816	99960816	+	2.69882e-07	2.04106e-06	-32.0466
336	NM_007929	Emp2	1229	39155	-	16	10274814	10274814	+	1.08695e-12	2.1445e-11	-25.6744
337	NM_007679	Cebpd	1236	61996	+	16	15949280	15949280	-	4.68988e-05	0.000202357	-27.2857
338	NM_011672	Ufd1	1238	2564	+	16	18814856	18814856	-	7.8292e-21	3.94047e-19	-33.8755
339	NM_025634	Teddm3	1242	-15100	-	16	21169043	21169043	-	3.91475e-26	3.09063e-24	-36.8829
340	NM_001012765	Adcy5	1260	-1922	+	16	35153714	35153714	-	1.5367e-06	9.78916e-06	-30.7117
341	NM_146860	Olfr161	1220	20528	+	16	3612924	3612924	-	1.57158e-19	7.01053e-18	-25.8422
342	NM_028615	Dppa2	1273	-1118	+	16	48309156	48309156	-	5.51186e-23	3.41051e-21	35.0685
343	NM_010816	Morc1	1274	48649	+	16	48479884	48479884	-	8.11905e-71	5.53271e-68	-27.9446
344	NM_021477	Rbfox1	1224	-20818	+	16	5863975	5863975	+	3.92451e-15	1.0703e-13	40.0146
345	NM_001162955	Gpr15	1277	999	-	16	58717726	58717726	+	2.88517e-08	2.68795e-07	-28.2089
346	NM_183188	Rbfox1	1225	239	+	16	7070072	7070072	+	1.99357e-10	2.75767e-09	-41.3889
347	NM_023380	Samsn1	1293	36855	-	16	75872412	75872412	-	4.82955e-11	7.37172e-10	-30.8405
348	NM_139134	Chodl	1296	39712	+	16	78970658	78970658	+	1.49744e-77	1.25085e-74	32.4889
349	NM_001113208	Ncam2	1297	315529	+	16	81516224	81516224	+	3.87847e-12	7.01104e-11	-29.9702
350	NM_029070	Tmem114	1227	28028	-	16	8397109	8397109	-	7.6002e-07	5.17301e-06	-25.4798
351	NM_001159331	N6amt1	1302	-34726	+	16	87319459	87319459	+	7.35704e-15	1.93707e-13	26.0495
352	NM_181490	Cldn17	1304	15621	-	16	88491358	88491358	-	1.02096e-12	2.022e-11	27.0113
353	NM_001145886	Tiam1	1306	736	-	16	89973964	89973964	+	4.13809e-08	3.72328e-07	29.0851
354	NM_025642	Mis18a	1309	4464	-	16	90722908	90722908	+	6.93506e-07	4.76791e-06	-28.2483
355	NM_139145	Hlcs	1315	60064	-	16	94227793	94227793	+	6.3918e-07	4.44218e-06	39.7557
356	NM_001025584	Kcnj6	1316	34751	-	16	94962946	94962946	-	1.44704e-13	3.24005e-12	-33.2083
357	NM_015775	Tmprss2	1319	-600	-	16	97611794	97611794	+	8.58677e-25	6.13392e-23	-28.8412
358	NM_022315	Smoc2	1339	28449	+	17	14307953	14307953	+	7.24712e-14	1.68839e-12	-30.4539
359	NM_011581	Thbs2	1340	-11	-	17	14694272	14694272	-	1.39166e-05	6.97381e-05	25.7988
360	NM_176962	Zfp944	1343	7677	-	17	22353724	22353724	+	2.07356e-35	2.98306e-33	-35.0257
361	NM_001104575	Vmn2r112	1344	73946	+	17	22675092	22675092	-	1.62602e-08	1.5865e-07	25.4086
362	NM_022422	Gng13	1349	-29277	+	17	25687895	25687895	+	1.8024e-08	1.74523e-07	-37.5817
363	NM_028101	Jmjd8	1350	-406	+	17	25828637	25828637	+	1.83091e-10	2.55038e-09	-31.9127
364	NM_001081070	Pdia2	1352	10752	-	17	26188336	26188336	-	1.06783e-05	5.52038e-05	25.579
365	NM_001251881	Ggnbp1	1354	-8764	+	17	27009271	27009271	-	7.58517e-07	5.16414e-06	27.477
366	NM_001291045	Grm4	1358	-1058	-	17	27504590	27504590	+	2.16433e-19	9.50728e-18	-46.6077
367	NM_011145	Ppard	1363	2838	+	17	28235590	28235590	-	1.91e-19	8.44018e-18	-33.2741
368	NM_011145	1810013A23Rik	1363	2838	+	17	28235590	28235590	-	1.91e-19	8.44018e-18	-33.2741
369	NM_021478	Tulp1	1364	-16096	-	17	28381238	28381238	+	2.76258e-08	2.5835e-07	40.4885
370	NM_008842	Pim1	1371	4630	+	17	29495673	29495673	-	1.05837e-18	4.34679e-17	-29.7075
371	NM_001162901	Tmem217	1372	4207	-	17	29545387	29545387	-	3.09438e-07	2.3092e-06	-34.7726
372	NM_025374	Glo1	1374	13929	-	17	30598731	30598731	-	3.82666e-15	1.04472e-13	32.6164
373	NM_021332	Glp1r	1375	-21125	+	17	30880742	30880742	+	6.3819e-36	9.49768e-34	35.7183
374	NM_021332	Glp1r	1376	-18482	+	17	30883385	30883385	+	1.52764e-26	1.24202e-24	-42.5905
375	NM_009363	Tff2	1378	6776	-	17	31137507	31137507	+	3.95185e-65	2.0264e-62	-52.8106
376	NM_028902	Hsf2bp	1379	2895	-	17	32031614	32031614	+	5.26298e-10	6.79918e-09	-25.8697
377	NM_177719	Morc2b	1380	202	-	17	33139482	33139482	-	6.50166e-07	4.50886e-06	-36.3979
378	NM_009995	Cyp21a1	1384	-416	-	17	34804841	34804841	-	3.66729e-12	6.66185e-11	26.6027
379	NM_010391	H2-Q10	1385	16754	+	17	35486841	35486841	+	3.75368e-05	0.000166541	-26.6871
380	NM_001177582	Esp23	1389	-116375	-	17	39193411	39193411	-	0.000208002	0.00073552	-27.3272
381	NM_001177582	Esp23	1390	-116419	-	17	39193455	39193455	-	3.03579e-15	8.42121e-14	-36.8548
382	NM_001145060	Glyatl3	1394	13573	-	17	40900778	40900778	-	8.02236e-20	3.68659e-18	-43.5668
383	NM_178589	Tnfrsf21	1395	-10232	+	17	43006323	43006323	-	2.76858e-11	4.40914e-10	-29.8852
384	NM_030598	Rcan2	1397	654	+	17	43953843	43953843	+	2.55827e-06	1.54438e-05	32.7289
385	NM_026768	Mrps18a	1403	-3174	+	17	46107830	46107830	+	1.24069e-08	1.23843e-07	-28.083
386	NM_025611	Cul7	1407	1125	+	17	46651461	46651461	-	2.25832e-06	1.38004e-05	-28.68
387	NM_025611	Cul7	1408	10964	+	17	46661300	46661300	-	5.92725e-05	0.000248561	-27.2727
388	NM_001290337	Prickle4	1410	1825	-	17	47692912	47692912	-	3.10447e-05	0.000140764	-25.541
389	NM_027452	Lrfn2	1412	82945	+	17	49015525	49015525	+	1.35984e-07	1.09801e-06	32.3742
390	NM_027452	Lrfn2	1413	82967	+	17	49015547	49015547	+	1.39971e-06	9.0107e-06	33.9274
391	NM_173449	Pp2d1	1420	-4935	-	17	53544385	53544385	+	4.26888e-13	8.97264e-12	-30.4845
392	NM_026935	Sult1c2	1422	-45996	-	17	53891953	53891953	-	2.08899e-06	1.28858e-05	-28.1462
393	NM_013733	Chaf1a	1423	-887	+	17	56039529	56039529	+	5.09988e-10	6.61134e-09	26.4137
394	NM_027787	Rfx2	1425	16415	-	17	56814594	56814594	+	4.17519e-41	8.2218e-39	25.7953
395	NM_010613	Khsrp	1427	9271	-	17	57022237	57022237	+	1.14293e-39	2.09902e-37	-27.5589
396	NM_011691	Vav1	1429	26220	+	17	57305318	57305318	-	2.69819e-10	3.64855e-09	28.8632
397	NM_028388	Ndufv2	1447	-1245	-	17	66102803	66102803	-	5.86206e-05	0.000246206	30.8516
398	NM_177278	L3mbtl4	1453	18729	+	17	68292524	68292524	+	3.08795e-10	4.13885e-09	-25.1573
399	NM_177278	L3mbtl4	1454	18758	+	17	68292553	68292553	+	1.5103e-07	1.20726e-06	-25.6061
400	NM_177278	L3mbtl4	1455	18889	+	17	68292684	68292684	-	1.67405e-08	1.63153e-07	-33.7746
401	NM_001206661	Tmem200c	1456	-30239	+	17	68806897	68806897	-	7.34434e-09	7.67327e-08	-29.01
402	NM_001033442	Gm1604b	1326	-275	+	17	7025268	7025268	-	1.36502e-06	8.81037e-06	28.9901
403	NM_027712	Dlgap1	1458	-122383	+	17	70302409	70302409	+	2.51929e-07	1.91902e-06	-28.6483
404	NM_028887	Smchd1	1463	-18793	-	17	71494135	71494135	-	2.51778e-19	1.09577e-17	-38.7915
405	NM_007439	Alk	1469	164037	-	17	72440271	72440271	-	8.02957e-20	3.68663e-18	-27.79
406	NM_001081416	Fndc1	1327	15980	-	17	7788995	7788995	-	2.38047e-10	3.25633e-09	-32.0814
407	NM_176963	Galm	1480	34221	+	17	80161690	80161690	-	6.82749e-09	7.1767e-08	-31.7854
408	NM_025325	Haao	1491	7817	-	17	83838974	83838974	-	0.000241645	0.00083627	-30.6554
409	NM_001159497	Ppm1b	1495	-40347	+	17	84916394	84916394	-	9.25278e-08	7.76287e-07	-33.1487
410	NM_010830	Msh6	1500	-46278	+	17	87928772	87928772	+	0.00056969	0.00174252	26.4444
411	NM_028341	Ttc39c	1520	2544	+	18	12646075	12646075	+	4.77392e-05	0.000205538	27.1922
412	NM_009280	Ss18	1523	13437	-	18	14669478	14669478	+	3.76484e-22	2.13795e-20	28.1145
413	NM_001167539	Vmn1r238	1508	82323	-	18	3041090	3041090	+	1.75752e-31	1.90822e-29	-26.2389
414	NM_026006	Sft2d3	1533	-792	-	18	31912694	31912694	-	2.39616e-11	3.86596e-10	-29.3464
415	NM_133658	Ercc3	1534	4894	+	18	32245223	32245223	-	5.52104e-10	7.10398e-09	-28.8177
416	NM_133658	Ercc3	1535	17922	+	18	32258251	32258251	-	1.10852e-14	2.85625e-13	-26.5388
417	NM_133774	Stard4	1536	20467	-	18	33193350	33193350	+	0.00010135	0.000396057	-30.5096
418	NM_026505	Bambi	1509	106765	+	18	3614720	3614720	+	6.76239e-08	5.82349e-07	25.6922
419	NM_010415	Hbegf	1537	12211	-	18	36503595	36503595	+	0.000165208	0.000604075	26.7993
420	NM_009959	Pcdha5	1539	459	+	18	36960897	36960897	+	2.51645e-42	5.29785e-40	44.5176
421	NM_026505	Bambi	1510	193665	+	18	3701620	3701620	-	1.8412e-10	2.56333e-09	-40.6979
422	NM_053126	Pcdhb1	1540	946	+	18	37265942	37265942	+	3.12468e-10	4.18375e-09	28.4869
423	NM_033586	Pcdhga3	1542	427	+	18	37674760	37674760	+	2.29848e-15	6.49773e-14	31.5386
424	NM_033576	Pcdhgb4	1543	889	+	18	37721441	37721441	+	1.42788e-23	9.29019e-22	-33.8949
425	NM_033591	Pcdhga8	1544	1032	+	18	37726736	37726736	+	2.72121e-138	7.41747e-135	29.2101
426	NM_033591	Pcdhga8	1545	1081	+	18	37726785	37726785	+	6.50127e-200	3.74113e-196	40.7964
427	NM_033593	Pcdhga10	1546	-685	+	18	37746503	37746503	+	3.76556e-07	2.75619e-06	30.0493
428	NM_033594	Pcdhga11	1547	1279	+	18	37757050	37757050	+	6.90085e-21	3.50731e-19	27.5568
429	NM_017378	Pcdh12	1552	325	-	18	38284077	38284077	+	1.47865e-08	1.45257e-07	-33.7931
430	NM_026092	Lyzl1	1511	-154625	+	18	4011207	4011207	+	5.19439e-09	5.59987e-08	-31.202
431	NM_026092	Lyzl1	1512	-154624	+	18	4011208	4011208	-	5.78753e-08	5.06654e-07	-27.4402
432	NM_029942	Prelid2	1557	33176	-	18	41918019	41918019	+	3.03641e-28	2.70664e-26	32.4717
433	NM_001033621	Myot	1562	1194	+	18	44335266	44335266	+	3.58608e-11	5.60421e-10	30.6969
434	NM_001033621	Myot	1563	1240	+	18	44335312	44335312	+	1.24469e-22	7.48692e-21	46.0572
435	NM_001312905	Kcnn2	1564	70666	+	18	45339524	45339524	+	4.77924e-12	8.51159e-11	-41.498
436	NM_008292	Hsd17b4	1569	10840	+	18	50139039	50139039	-	1.92744e-08	1.8544e-07	-25.5753
437	NM_026108	Pudp	1570	-180166	-	18	50748864	50748864	+	1.28025e-53	4.25026e-51	-34.4109
438	NM_026286	Ftmt	1571	-154864	+	18	52176672	52176672	+	8.97373e-10	1.11264e-08	-43.9655
439	NM_001033281	Prdm6	1573	27057	+	18	53491601	53491601	-	2.57234e-11	4.12323e-10	37.0117
440	NM_010721	Lmnb1	1576	-3330	+	18	56704483	56704483	+	2.50932e-11	4.03345e-10	-41.1026
441	NM_010181	Fbn2	1578	69175	-	18	58140752	58140752	-	6.03299e-13	1.24333e-11	32.725
442	NM_025478	Isoc1	1579	6113	+	18	58665593	58665593	-	6.61879e-38	1.13131e-35	-37.011
443	NM_178928	Afap1l1	1585	1327	-	18	61785336	61785336	+	5.24752e-29	4.91445e-27	-38.5614
444	NM_001039485	Piezo2	1587	91965	-	18	63295219	63295219	-	3.75321e-13	7.94031e-12	-31.8947
445	NM_009182	St8sia3	1589	-117013	+	18	64137346	64137346	-	1.07103e-11	1.81806e-10	28.213
446	NM_009182	St8sia3	1590	11141	+	18	64265498	64265498	+	1.17999e-06	7.71908e-06	-27.6587
447	NM_027350	Nars	1591	-34917	-	18	64551473	64551473	+	3.54305e-15	9.72416e-14	-39.5163
448	NM_001172062	Lman1	1593	-10575	-	18	66013209	66013209	+	8.49451e-12	1.46337e-10	36.018
449	NM_021451	Pmaip1	1594	963	+	18	66459565	66459565	-	8.21131e-09	8.4883e-08	30.9344
450	NM_176832	Spire1	1600	22309	-	18	67526865	67526865	+	4.12895e-19	1.7571e-17	-26.0651
451	NM_177595	Mkx	1517	37154	-	18	6967626	6967626	+	1.92377e-11	3.14297e-10	34.3167
452	NM_025581	Ska1	1604	40586	-	18	74167233	74167233	+	2.94003e-10	3.95697e-09	-26.5541
453	NM_177470	Acaa2	1605	50428	+	18	74829638	74829638	-	5.73252e-08	5.02518e-07	25.6766
454	NM_177470	Acaa2	1606	58278	+	18	74837488	74837488	-	9.5681e-06	5.00487e-05	-25.5639
455	NM_001164504	Rnf165	1614	-15511	-	18	77580646	77580646	-	4.83917e-06	2.73693e-05	-27.5772
456	NM_001171011	Slc14a1	1615	8364	-	18	78133756	78133756	-	5.01152e-09	5.42078e-08	29.3774
457	NM_001171011	Slc14a1	1616	8257	-	18	78133863	78133863	+	8.84905e-10	1.0985e-08	36.9579
458	NM_199197	Rbfa	1617	-780	-	18	80201398	80201398	+	1.50907e-11	2.50978e-10	35.7643
459	NM_008082	Galr1	1634	117442	-	18	82289336	82289336	+	9.82034e-06	5.1213e-05	-26.1558
460	NM_001081300	Tshz1	1641	7194	-	18	84079369	84079369	-	6.9434e-22	3.86251e-20	-37.3389
461	NM_001039173	Dok6	1646	156483	-	18	89612654	89612654	-	3.95999e-16	1.2422e-14	-25.4161
462	NM_023044	Slc15a3	1658	-78	+	19	10842466	10842466	+	5.98165e-11	9.03178e-10	-44.8127
463	NM_001302951	Tle4	1664	645	-	19	14596569	14596569	-	6.13026e-06	3.38291e-05	-29.5239
464	NM_177420	Psat1	1666	-22560	-	19	15947618	15947618	+	5.17465e-14	1.22877e-12	-30.8845
465	NM_008137	Gna14	1667	67136	+	19	16502801	16502801	-	9.68956e-11	1.41358e-09	-29.7403
466	NM_001136484	Gcnt1	1668	98349	-	19	17241157	17241157	+	2.81256e-06	1.68046e-05	-25.3683
467	NM_017375	Ostf1	1669	67179	-	19	18564635	18564635	+	8.81546e-11	1.29555e-09	-27.8235
468	NM_017375	Ostf1	1670	16123	-	19	18615691	18615691	-	3.91882e-13	8.27042e-12	-32.537
469	NM_001043354	Rorb	1672	2706	-	19	19108491	19108491	+	5.59295e-14	1.32385e-12	30.8176
470	NM_010051	Dkk1	1683	-189511	-	19	30739006	30739006	+	2.34172e-25	1.7425e-23	-61.1905
471	NM_001013833	Prkg1	1685	3851	-	19	31761183	31761183	+	2.62958e-45	6.30492e-43	-60.6132
472	NM_024204	Ankrd22	1688	14128	-	19	34151914	34151914	-	4.39532e-07	3.16686e-06	-29.1398
473	NM_010253	Gal	1649	-71620	-	19	3486076	3486076	+	2.00959e-17	7.2832e-16	-25.3739
474	NM_019428	Rpp30	1691	5446	+	19	36089160	36089160	+	9.19266e-18	3.47256e-16	-44.0468
475	NM_007811	Cyp26a1	1692	38537	+	19	37736343	37736343	-	9.27605e-11	1.35747e-09	-37.3307
476	NM_019588	Plce1	1694	21455	+	19	38545650	38545650	+	1.91782e-10	2.65927e-09	-44.3627
477	NM_028191	Cyp2c65	1696	-14340	+	19	39046666	39046666	+	2.33737e-09	2.68945e-08	-28.3878
478	NM_010003	Cyp2c39	1697	-16125	+	19	39494697	39494697	-	9.89463e-05	0.00038795	-25.7897
479	NM_010003	Cyp2c39	1698	40216	+	19	39551036	39551036	+	3.53796e-06	2.06504e-05	-31.0956
480	NM_010004	Cyp2c40	1699	30685	-	19	39782130	39782130	-	1.42742e-07	1.14686e-06	-32.459
481	NM_031396	Cnnm1	1708	31533	+	19	43471967	43471967	+	8.08929e-13	1.62887e-11	-32.877
482	NM_001163267	Cfap58	1716	1049	+	19	47938759	47938759	-	3.89355e-10	5.12837e-09	31.6327
483	NM_025696	Sorcs3	1717	38038	+	19	48244061	48244061	-	1.36241e-52	4.32878e-50	41.195
484	NM_025696	Sorcs3	1718	454522	+	19	48660545	48660545	-	4.93565e-06	2.78497e-05	35.6166
485	NM_025696	Sorcs3	1719	454545	+	19	48660568	48660568	-	5.70962e-10	7.33387e-09	42.2136
486	NM_008386	Ins1	1721	-386386	+	19	51877911	51877911	+	7.04614e-06	3.82115e-05	-28.1616
487	NM_145505	Fam160b1	1728	17935	+	19	57378942	57378942	-	1.73562e-16	5.66046e-15	-42.3438
488	NM_145505	Fam160b1	1729	17960	+	19	57378967	57378967	-	3.20632e-09	3.58419e-08	-30.1844
489	NM_145505	Fam160b1	1730	17979	+	19	57378986	57378986	-	3.08088e-09	3.45739e-08	-26.7455
490	NM_007750	Cox8a	1652	-1523	-	19	7219138	7219138	-	1.29852e-22	7.7926e-21	-26.038
491	NM_001136064	Bscl2	1655	-6139	+	19	8831328	8831328	-	6.0719e-05	0.000253963	-25.2953
492	NM_207206	Lpcat4	1852	-40704	+	2	112199137	112199137	-	2.30703e-06	1.40566e-05	32.264
493	NM_028844	Aven	1853	4121	+	2	112497083	112497083	-	4.16353e-18	1.62862e-16	-31.5694
494	NM_001109761	Capn3	1865	16935	+	2	120493842	120493842	-	9.48859e-09	9.70792e-08	-42.7721
495	NM_001109761	Capn3	1866	17954	+	2	120494861	120494861	-	2.31266e-06	1.40843e-05	-26.0411
496	NM_026220	Mfap1a	1868	6655	-	2	121500002	121500002	-	3.39066e-14	8.24425e-13	-26.6482
497	NM_001081091	Cep152	1872	1038	-	2	125624076	125624076	-	0.000130772	0.000493743	-25.6098
498	NM_016902	Nphp1	1874	3566	-	2	127785326	127785326	-	2.65308e-07	2.01146e-06	-29.3054
499	NM_027478	Tmem230	1878	11960	-	2	132235829	132235829	+	6.36102e-18	2.44028e-16	-32.886
500	NM_001276489	Ism1	1894	-45239	+	2	139632939	139632939	+	7.88716e-10	9.87135e-09	-25.4163
501	NM_001081133	Kif16b	1896	926150	-	2	141975315	141975315	-	5.8009e-05	0.000243954	30.3553
502	NM_001081133	Kif16b	1897	671006	-	2	142230459	142230459	+	3.9556e-05	0.00017435	-26.0504
503	NM_020595	Otor	1898	16819	+	2	143095309	143095309	-	9.46014e-10	1.16625e-08	-25.0595
504	NM_175280	Cfap61	1899	3446	+	2	145938228	145938228	+	2.00988e-20	9.73729e-19	-42.1923
505	NM_054068	Vsx1	1901	-1332	-	2	150690468	150690468	+	5.7245e-08	5.0207e-07	31.1344
506	NM_054068	Vsx1	1902	-1359	-	2	150690495	150690495	+	6.09919e-08	5.31154e-07	33.0065
507	NM_172117	Entpd6	1903	1631	+	2	150750710	150750710	-	4.52786e-26	3.54763e-24	-46.9466
508	NM_172117	Entpd6	1904	1701	+	2	150750780	150750780	-	2.56112e-11	4.10651e-10	-28.9466
509	NM_001037247	Defb36	1908	4019	+	2	152608344	152608344	-	4.17183e-13	8.77575e-12	-26.366
510	NM_001310455	Malrd1	1755	-161148	+	2	15365331	15365331	-	4.32346e-05	0.000188616	-26.0443
511	NM_011171	Procr	1912	2771	+	2	155753986	155753986	-	5.22919e-05	0.000222531	-26.3814
512	NM_198627	Vstm2l	1919	-32565	+	2	157882088	157882088	+	2.00717e-18	8.07703e-17	45.5377
513	NM_198627	Vstm2l	1920	-32429	+	2	157882224	157882224	-	5.36359e-05	0.000227745	29.9027
514	NM_001033411	Gm826	1924	15774	-	2	160311721	160311721	+	1.00486e-05	5.22877e-05	-31.2583
515	NM_011521	Sdc4	1935	15506	-	2	164427683	164427683	+	2.10286e-05	9.97775e-05	-27.1824
516	NM_011125	Pltp	1936	-4230	-	2	164861937	164861937	-	9.00542e-18	3.4068e-16	32.582
517	NM_130451	Slc2a10	1941	39594	+	2	165543489	165543489	+	3.90393e-20	1.83638e-18	-51.4493
518	NM_001271963	Eya2	1942	-32119	+	2	165562909	165562909	+	4.45472e-15	1.20601e-13	-29.0068
519	NM_008679	Ncoa3	1943	20464	+	2	166013099	166013099	-	2.81697e-10	3.80123e-09	-38.3742
520	NM_019835	B4galt5	1948	-34951	-	2	167384128	167384128	-	6.55e-07	4.53509e-06	27.4571
521	NM_009564	Zfp64	1951	9789	-	2	168945799	168945799	-	3.03627e-07	2.2691e-06	-25.726
522	NM_022995	Pmepa1	1968	-2564	-	2	173279096	173279096	-	2.93504e-12	5.41911e-11	27.0229
523	NM_028518	Col20a1	1979	1325	+	2	180987858	180987858	+	1.7953e-05	8.70341e-05	25.204
524	NM_019498	Olfm1	1768	55016	+	2	28260703	28260703	-	6.7463e-05	0.000278666	30.1445
525	NM_001145835	Ralgds	1770	3165	+	2	28536627	28536627	+	4.70588e-06	2.67029e-05	-26.9836
526	NM_001039086	Rapgef1	1773	-13928	+	2	29605792	29605792	+	1.70421e-06	1.07347e-05	-26.5982
527	NM_022415	Ptges	1774	28481	-	2	30874817	30874817	-	3.32656e-10	4.43685e-09	34.8684
528	NM_007494	Ass1	1775	-26757	+	2	31443513	31443513	-	3.16023e-11	4.97775e-10	39.7138
529	NM_001252547	Sh2d3c	1776	-1202	+	2	32726487	32726487	+	2.05599e-08	1.96857e-07	-30.4805
530	NM_001083126	Lhx6	1778	6446	-	2	36097615	36097615	+	9.21825e-08	7.73891e-07	-39.4065
531	NM_001083126	Lhx6	1779	6409	-	2	36097652	36097652	+	1.50863e-10	2.12895e-09	-44.6281
532	NM_146628	Olfr344	1780	-19227	+	2	36549373	36549373	+	1.01059e-20	5.04223e-19	-49.4623
533	NM_146374	Olfr368	1781	-259	+	2	37331490	37331490	-	3.83741e-19	1.64383e-17	34.4447
534	NM_001033960	Rabgap1	1782	-616	+	2	37451638	37451638	-	1.00031e-23	6.6248e-22	-25.3771
535	NM_001033960	Rabgap1	1783	-548	+	2	37451706	37451706	-	9.86848e-34	1.25884e-31	-33.0912
536	NM_025592	Rpl35	1785	-965	-	2	39006095	39006095	-	6.97167e-05	0.000286474	25.7939
537	NM_001177844	Frmd4a	1742	4200	+	2	4563952	4563952	-	6.88189e-05	0.00028361	-26.9321
538	NM_172663	Epc2	1788	-86810	+	2	49364676	49364676	-	1.90232e-07	1.48801e-06	29.4879
539	NM_008426	Kcnj3	1797	133481	+	2	55569449	55569449	-	3.50211e-09	3.88632e-08	35.1167
540	NM_008426	Kcnj3	1798	133483	+	2	55569451	55569451	-	9.16962e-07	6.13005e-06	28.7587
541	NM_001290376	Camk1d	1743	-17346	-	2	5693391	5693391	+	2.31372e-08	2.19264e-07	-34.1667
542	NM_001290376	Camk1d	1744	-17466	-	2	5693511	5693511	-	0.000245716	0.000848262	-25.6056
543	NM_139200	Cytip	1801	25306	-	2	58134817	58134817	-	1.56053e-06	9.92874e-06	-31.8019
544	NM_010074	Dpp4	1804	89084	-	2	62323148	62323148	+	2.76807e-17	9.85284e-16	29.5427
545	NM_010074	Dpp4	1805	73763	-	2	62338469	62338469	-	8.78698e-09	9.0383e-08	-33.9181
546	NM_001267846	Fign	1806	22878	-	2	64075161	64075161	-	3.42354e-06	2.00572e-05	30.5357
547	NM_001081088	Lrp2	1809	-21367	-	2	69607433	69607433	-	1.55291e-08	1.52061e-07	-27.147
548	NM_001081088	Lrp2	1810	-27404	-	2	69613470	69613470	+	5.67715e-06	3.15743e-05	28.6822
549	NM_001081088	Lrp2	1811	-27589	-	2	69613655	69613655	-	6.50152e-11	9.74852e-10	-29.3383
550	NM_010053	Dlx1	1813	3555	+	2	71532998	71532998	-	6.93101e-07	4.76577e-06	-28.6216
551	NM_010053	Dlx1	1814	3591	+	2	71533034	71533034	-	6.35537e-07	4.41924e-06	25.3827
552	NM_010054	Dlx2	1815	2577	-	2	71544178	71544178	+	4.00812e-07	2.91055e-06	-31.8429
553	NM_010054	Dlx2	1816	-19891	-	2	71566644	71566644	-	9.1886e-06	4.82635e-05	-35.2174
554	NM_025866	Cdca7	1817	6800	+	2	72483017	72483017	+	5.6409e-11	8.54968e-10	-28.7018
555	NM_001098425	Sp3	1818	23546	-	2	72955736	72955736	+	3.10964e-08	2.87228e-07	-27.1265
556	NM_018782	Calcrl	1830	134046	-	2	84291221	84291221	-	1.2067e-06	7.87491e-06	-26.961
557	NM_133840	Clp1	1831	1169	-	2	84726100	84726100	-	2.12736e-07	1.64663e-06	-30.7415
558	NM_001081664	Fads2b	1833	22940	-	2	85495996	85495996	-	1.86886e-07	1.46383e-06	-30.9265
559	NM_207674	Olfr1082	1834	17259	-	2	86581551	86581551	-	1.27792e-07	1.03769e-06	-33.5608
560	NM_146661	Olfr1112	1835	3801	+	2	87195488	87195488	+	4.05487e-12	7.30187e-11	25.4763
561	NM_146969	Olfr1243	1836	7902	-	2	89520507	89520507	-	7.03992e-18	2.6868e-16	-27.7271
562	NM_146373	Olfr1253	1837	-10436	-	2	89763261	89763261	-	1.36246e-13	3.06126e-12	-31.4789
563	NM_001289742	Lrrc4c	1845	16456	+	2	96334623	96334623	+	1.29205e-06	8.37279e-06	-29.107
564	NM_025679	Sike1	2068	6580	+	3	103002318	103002318	-	1.98896e-59	8.44329e-57	30.7252
565	NM_001033303	Ampd1	2069	7775	+	3	103081787	103081787	+	4.80617e-15	1.29439e-13	-38.0714
566	NM_009892	Chil3	2073	-23045	-	3	106190608	106190608	-	1.89154e-08	1.82291e-07	29.776
567	NM_001078646	Henmt1	2075	14954	+	3	108955509	108955509	-	5.47874e-12	9.6775e-11	-36.3732
568	NM_001286750	Olfm3	2077	21151	+	3	114925784	114925784	+	1.28004e-14	3.2812e-13	26.8844
569	NM_013867	Bcar3	2084	1119	+	3	122420897	122420897	+	1.71037e-13	3.7871e-12	32.7922
570	NM_013867	Bcar3	2085	13253	+	3	122433031	122433031	-	2.75589e-06	1.64927e-05	32.2975
571	NM_201638	Mettl14	2087	-1122	-	3	123387111	123387111	+	9.97669e-07	6.62257e-06	-34.2878
572	NM_027808	Alpk1	2090	40712	-	3	127739816	127739816	-	1.58457e-09	1.87304e-08	29.0899
573	NM_001163328	Ralyl	1987	-682979	+	3	12788676	12788676	-	3.59441e-08	3.2768e-07	47.6435
574	NM_198711	Col25a1	2094	83746	+	3	130264589	130264589	-	9.2283e-05	0.000365414	29.0909
575	NM_198711	Col25a1	2095	180032	+	3	130360875	130360875	-	3.83256e-06	2.21849e-05	37.2159
576	NM_001163587	Etnppl	2096	-89387	+	3	130528061	130528061	+	5.63097e-17	1.95461e-15	31.0351
577	NM_001040400	Tet2	2098	42289	-	3	133502102	133502102	+	2.50426e-07	1.91007e-06	-25.6666
578	NM_008811	Pdha2	2108	-5520	-	3	141217874	141217874	+	3.01695e-37	4.99195e-35	-36.4445
579	NM_029289	Cypt12	1988	-54668	+	3	17893776	17893776	-	4.4903e-08	4.01577e-07	-25.3409
580	NM_205769	Crh	1990	-22193	-	3	19717588	19717588	+	6.24287e-08	5.42137e-07	25.5717
581	NM_178772	Nceh1	1999	-12759	+	3	27170245	27170245	-	3.37756e-15	9.29953e-14	-34.6235
582	NM_009425	Tnfsf10	2000	-10288	+	3	27306789	27306789	-	1.83599e-07	1.44069e-06	-26.5376
583	NM_177330	Ghsr	2001	32124	+	3	27403473	27403473	-	6.51436e-12	1.13826e-10	27.2383
584	NM_013920	Hnf4g	1980	-391099	+	3	3116931	3116931	+	5.76504e-07	4.05063e-06	-26.6667
585	NM_021782	Il21	2011	-27727	-	3	37260362	37260362	+	7.35733e-12	1.27693e-10	33.3333
586	NM_001130184	Jade1	2015	-4633	+	3	41551101	41551101	-	9.03491e-40	1.66519e-37	-35.5276
587	NM_028667	D3Ertd751e	2016	677263	+	3	42419879	42419879	-	0.000183719	0.000661258	26.1364
588	NM_028667	D3Ertd751e	2017	1342194	+	3	43084810	43084810	-	6.58844e-13	1.34708e-11	-28.4253
589	NM_001004176	Maml3	2021	151202	-	3	51953805	51953805	+	2.6175e-09	2.97477e-08	-28.817
590	NM_001004176	Maml3	2022	101633	-	3	52003374	52003374	+	9.78223e-07	6.50349e-06	-31.998
591	NM_026435	Ufm1	2026	15611	-	3	53848197	53848197	-	3.31257e-07	2.45715e-06	27.7586
592	NM_001113419	Iqschfp	2034	-58211	+	3	67834009	67834009	-	0.000502317	0.00156585	28.6295
593	NM_001113419	Iqschfp	2035	-24156	+	3	67868064	67868064	-	3.52577e-08	3.22046e-07	25.1126
594	NM_001113420	Schip1	2036	-17463	+	3	68047339	68047339	-	1.06656e-07	8.81958e-07	25.3365
595	NM_001081137	Sis	2038	204412	-	3	72762455	72762455	-	1.09172e-32	1.29679e-30	-33.5205
596	NM_001253719	Fstl5	2040	475546	+	3	76551127	76551127	+	2.7771e-12	5.14953e-11	-29.1382
597	NM_001081230	Map9	2043	70635	+	3	82428705	82428705	-	6.90454e-17	2.36969e-15	-26.4459
598	NM_177260	Tmem154	2046	36124	+	3	84702314	84702314	-	6.12169e-06	3.37927e-05	33.4489
599	NM_009690	Cd5l	2049	-31585	+	3	87326296	87326296	-	8.27429e-35	1.13068e-32	31.8187
600	NM_009690	Cd5l	2050	-31564	+	3	87326317	87326317	-	1.69877e-41	3.43669e-39	26.819
601	NM_013605	Muc1	2051	7934	+	3	89236988	89236988	-	1.40219e-09	1.67211e-08	-32.0846
602	NM_027348	Pmvk	2052	13706	+	3	89473275	89473275	-	5.29755e-36	7.92949e-34	-43.9254
603	NM_001310681	Hax1	2053	1604	-	3	89996500	89996500	+	1.11444e-20	5.52844e-19	-35.9436
604	NM_013650	S100a8	2055	4143	+	3	90673212	90673212	-	2.33462e-13	5.07174e-12	-32.6791
605	NM_177660	Zbtb10	1983	14480	+	3	9265045	9265045	+	3.07346e-13	6.57746e-12	-25.2215
606	NM_001163098	Tchh	2056	3768	+	3	93446096	93446096	+	1.0096e-20	5.04217e-19	-29.9349
607	NM_023210	Anp32e	2059	6200	+	3	95935455	95935455	+	1.30412e-07	1.05598e-06	-25.2438
608	NM_023210	Anp32e	2060	16454	+	3	95945709	95945709	-	1.50917e-23	9.78222e-22	-50.9807
609	NM_153053	Sf3b4	2061	-3839	+	3	96168667	96168667	+	4.42813e-10	5.79417e-09	-30.3162
610	NM_146135	Pias3	2062	-7241	+	3	96689134	96689134	-	3.87465e-10	5.10737e-09	-34.7875
611	NM_001289701	Pde4dip	2065	19216	-	3	97869492	97869492	-	1.90815e-16	6.17645e-15	43.0509
612	NM_027665	Adam30	2066	-10595	+	3	98150039	98150039	-	1.55767e-19	6.95447e-18	36.0672
613	NM_198037	Cachd1	2207	127160	+	4	100903837	100903837	-	3.84485e-09	4.24031e-08	-34.9697
614	NM_001177981	Pde4b	2208	1008	+	4	102590849	102590849	+	1.71679e-14	4.32664e-13	-43.8988
615	NM_025590	Acot11	2213	11716	-	4	106788116	106788116	+	5.81004e-12	1.02174e-10	34.7622
616	NM_177669	Skint11	2217	-24993	+	4	114138391	114138391	+	1.09184e-07	8.99991e-07	-30.8976
617	NM_001029912	Zswim5	2221	46438	+	4	116923838	116923838	-	1.93106e-07	1.50799e-06	-27.595
618	NM_013848	Ermap	2227	378	-	4	119189634	119189634	+	3.44299e-10	4.57798e-09	-33.9135
619	NM_182929	Rims3	2230	8180	+	4	120886047	120886047	-	1.27784e-12	2.48986e-11	38.893
620	NM_010291	Gjb5	2244	-17472	-	4	127375635	127375635	-	1.32514e-05	6.68768e-05	25.7587
621	NM_010807	Marcksl1	2255	6400	+	4	129519979	129519979	+	3.69513e-13	7.82383e-12	28.6493
622	NM_010166	Eya3	2259	8763	+	4	132647807	132647807	+	7.7291e-32	8.62695e-30	37.955
623	NM_010166	Eya3	2260	8768	+	4	132647812	132647812	+	2.69011e-13	5.79538e-12	25.3271
624	NM_001080712	Zpld2	2261	-4782	-	4	134207785	134207785	-	5.58132e-09	5.97349e-08	-25.6957
625	NM_207237	Man1c1	2263	-9200	-	4	134713489	134713489	+	9.99109e-05	0.000391288	28.7248
626	NM_001177542	Pramel29	2270	-15260	-	4	144228276	144228276	+	6.91764e-07	4.7572e-06	-28.2051
627	NM_001243138	Zfp981	2274	-19088	+	4	146482912	146482912	-	0.000150147	0.000555556	-27.4707
628	NM_001039209	Zfp982	2276	-23334	+	4	147477352	147477352	+	6.41176e-13	1.31459e-11	-39.3098
629	NM_178617	Necab1	2133	11049	-	4	15138083	15138083	-	2.14051e-18	8.59359e-17	33.5255
630	NM_028513	Actrt2	2306	-73758	-	4	154741624	154741624	-	2.45438e-13	5.30964e-12	-42.4279
631	NM_001290410	Nkain3	2137	336266	-	4	20442403	20442403	+	6.36624e-06	3.49526e-05	-26.285
632	NM_026293	Spaca1	2145	-64484	-	4	34114550	34114550	+	1.58392e-05	7.80954e-05	27.57
633	NM_021535	Smu1	2153	1201	-	4	40756685	40756685	+	0.000174219	0.000631982	-29.7543
634	NM_019475	Olfr157	2158	2771	-	4	43833747	43833747	+	6.88894e-13	1.40464e-11	-41.4481
635	NM_001009949	Slc25a51	2162	10951	-	4	45397816	45397816	+	1.29381e-06	8.38317e-06	-29.1186
636	NM_001033306	Shb	2163	-15355	-	4	45546182	45546182	-	6.11927e-13	1.25961e-11	30.6344
637	NM_001164804	Coro2a	2169	3511	-	4	46598419	46598419	-	5.40513e-28	4.74461e-26	-39.6313
638	NM_019998	Alg2	2170	27221	-	4	47447147	47447147	+	9.14328e-07	6.11481e-06	-31.2326
639	NM_001164565	Acnat1	2175	16779	-	4	49434331	49434331	+	1.33685e-10	1.90207e-09	-27.2879
640	NM_001004025	Ppp3r2	2176	8108	-	4	49673876	49673876	-	2.63544e-29	2.50439e-27	30.7148
641	NM_010637	Klf4	2177	9320	-	4	55523156	55523156	-	0.000612408	0.00185196	-27.2262
642	NM_018761	Ctnnal1	2178	5761	-	4	56859451	56859451	-	3.96096e-06	2.28643e-05	-30.051
643	NM_001163288	Susd1	2181	46679	-	4	59391955	59391955	+	9.98405e-05	0.000391072	-35.3207
644	NM_021297	Tlr4	2182	-144837	+	4	66682714	66682714	-	2.74864e-11	4.38276e-10	-29.3145
645	NM_019967	Brinp1	2183	293553	-	4	68660845	68660845	+	0.000493383	0.00154162	-25.0309
646	NM_001199270	Aldoart1	2189	130423	-	4	72722212	72722212	+	1.58401e-07	1.26131e-06	-25.3807
647	NM_001199270	Aldoart1	2190	-139312	-	4	72991945	72991945	-	3.84653e-21	1.99811e-19	-29.5392
648	NM_025849	Dmac1	2191	-4025	-	4	75282310	75282310	-	2.70888e-13	5.83097e-12	-27.9064
649	NM_029949	Snapc3	2196	9956	+	4	83427698	83427698	+	1.18649e-11	1.99831e-10	28.0255
650	NM_001277149	Chd7	2129	-2620	+	4	8687786	8687786	+	2.35708e-15	6.65975e-14	-32.7887
651	NM_175647	Dmrta1	2198	1387	+	4	89689583	89689583	-	3.88472e-11	6.02725e-10	25.3414
652	NM_175647	Dmrta1	2199	1608	+	4	89689804	89689804	-	3.79257e-09	4.18622e-08	27.6254
653	NM_153102	Zfp352	2200	-88079	+	4	90130741	90130741	-	1.77011e-06	1.10972e-05	-26.0394
654	NM_152803	Hpse	2398	20931	-	5	100698753	100698753	+	5.06e-25	3.67027e-23	-41.9226
655	NM_144955	Nkx6-1	2401	-2584	-	5	101667294	101667294	+	6.20419e-09	6.58163e-08	32.4654
656	NM_001204233	Spp1	2404	320	+	5	104436510	104436510	+	1.72336e-09	2.02388e-08	-25.976
657	NM_001122639	Galnt9	2416	-1391	+	5	110602114	110602114	-	2.44797e-05	0.000114114	-28.0923
658	NM_001285806	Grk3	2422	36204	-	5	112979335	112979335	-	0.000267486	0.000911511	29.9167
659	NM_001309526	Sgsm1	2424	-5058	-	5	113285658	113285658	+	1.46151e-13	3.27102e-12	-53.5768
660	NM_011779	Coro1c	2426	2630	-	5	113906077	113906077	+	6.39274e-13	1.31173e-11	25.9252
661	NM_198109	Ssh1	2427	4143	-	5	113989615	113989615	-	3.56935e-15	9.78078e-14	35.5016
662	NM_001101546	Tmem233	2433	3005	-	5	116080242	116080242	+	6.37862e-06	3.49983e-05	-32.871
663	NM_001081308	Taok3	2440	-2302	+	5	117131286	117131286	+	5.74969e-24	3.88743e-22	26.6005
664	NM_001302345	Rph3a	2457	-474	-	5	121008957	121008957	-	4.09366e-21	2.12223e-19	-30.0838
665	NM_181421	Hectd4	2458	9075	+	5	121229292	121229292	-	8.12035e-06	4.32535e-05	28.4934
666	NM_030564	Rnf34	2460	16938	+	5	122867124	122867124	+	5.74404e-20	2.67522e-18	38.2609
667	NM_175520	Hcar1	2464	-6610	-	5	123886629	123886629	+	8.91745e-19	3.69468e-17	30.5131
668	NM_021430	Rilpl1	2465	1123	-	5	124530269	124530269	+	0.00011263	0.00043317	25.7503
669	NM_019536	Dnah10	2466	-9721	+	5	124715364	124715364	+	1.91567e-05	9.21093e-05	-27.3478
670	NM_019639	Ubc	2467	-13871	-	5	125403887	125403887	-	3.91049e-34	5.10138e-32	26.9232
671	NM_001190352	Tmem132b	2468	54203	+	5	125586619	125586619	+	3.65381e-07	2.68527e-06	30.8436
672	NM_175432	Tmem132c	2473	2502	+	5	127244326	127244326	+	6.57874e-13	1.34615e-11	-27.297
673	NM_028826	Septin14	2492	15269	-	5	129693243	129693243	+	3.26775e-06	1.92315e-05	25.812
674	NM_001015876	Tyw1	2495	19159	+	5	130276194	130276194	-	4.17979e-57	1.61546e-54	-55.4681
675	NM_001081466	Gtf2ird1	2499	-38449	-	5	134495164	134495164	-	9.06795e-17	3.06947e-15	-27.509
676	NM_013560	Hspb1	2501	15450	+	5	135903367	135903367	+	1.0297e-14	2.66374e-13	36.3649
677	NM_008871	Serpine1	2503	12304	-	5	137059969	137059969	-	4.35326e-07	3.13961e-06	-26.4147
678	NM_173405	Amz1	2504	-767	+	5	140723360	140723360	-	2.05982e-07	1.59818e-06	28.4558
679	NM_011348	Sema3e	2315	91313	+	5	14116587	14116587	+	5.62892e-59	2.33218e-56	-25.9654
680	NM_029749	Usp42	2514	18571	-	5	143713710	143713710	-	1.18303e-05	6.04174e-05	-25.6757
681	NM_016789	Nptx2	2516	11338	+	5	144557223	144557223	+	2.776e-07	2.09301e-06	-33.9331
682	NM_017396	Cyp3a41a	2518	-5623	-	5	145725758	145725758	+	1.27525e-20	6.28403e-19	29.7332
683	NM_008151	Gpr12	2520	10210	-	5	146574195	146574195	+	0.000481567	0.0015101	27.193
684	NM_010228	Flt1	2525	2090	-	5	147723899	147723899	+	4.2472e-15	1.15284e-13	25.6737
685	NM_001301424	Slc7a1	2526	17169	-	5	148375647	148375647	-	2.99435e-06	1.77759e-05	-31.8686
686	NM_175437	Gsap	2320	27742	+	5	21214007	21214007	+	4.63908e-25	3.37441e-23	-31.8448
687	NM_030727	Slc26a5	2321	-103735	-	5	21969338	21969338	+	2.73033e-07	2.06128e-06	-32.9588
688	NM_026449	Galntl5	2325	14519	+	5	25195997	25195997	+	1.79013e-17	6.52895e-16	-25.1005
689	NM_010075	Dpp6	2326	-100260	+	5	26717097	26717097	-	3.38713e-09	3.76653e-08	25.4944
690	NM_001136060	Dpp6	2327	-103153	+	5	27158782	27158782	+	2.99265e-11	4.73106e-10	-42.3029
691	NM_008037	Fosl2	2331	4813	+	5	32141283	32141283	-	1.38692e-05	6.9534e-05	33.0916
692	NM_011320	Nkx1-1	2333	-77921	-	5	33512010	33512010	-	1.13693e-07	9.33443e-07	26.0695
693	NM_011320	Nkx1-1	2334	-94600	-	5	33528689	33528689	-	7.45759e-06	4.0136e-05	-28.3333
694	NM_011320	Nkx1-1	2335	-94634	-	5	33528723	33528723	-	0.000132656	0.000499655	-29.3627
695	NM_001001985	Nat8l	2336	-752	+	5	33995232	33995232	+	6.78719e-11	1.01446e-09	-45.2693
696	NM_010445	Hmx1	2337	9580	+	5	35398695	35398695	-	1.19503e-07	9.76656e-07	26.9022
697	NM_172135	Mterf1a	2308	-9820	-	5	3903752	3903752	-	6.11844e-09	6.49866e-08	29.7705
698	NM_001163317	Clrn2	2344	9498	+	5	45463247	45463247	-	1.23298e-09	1.48883e-08	30.6618
699	NM_001199244	Kcnip4	2347	189602	-	5	49096058	49096058	-	4.54607e-18	1.76625e-16	-31.1255
700	NM_001199244	Kcnip4	2348	61449	-	5	49224211	49224211	-	3.62542e-32	4.14483e-30	-26.8882
701	NM_019468	G6pd2	2354	277896	+	5	62086737	62086737	-	8.68589e-11	1.27765e-09	-30.159
702	NM_177006	Nwd2	2355	18467	+	5	63667568	63667568	+	3.80167e-35	5.35023e-33	-64.2844
703	NM_010252	Gabrg1	2361	-205	-	5	70842821	70842821	-	8.36823e-16	2.52559e-14	32.4521
704	NM_178599	Commd8	2363	-8886	-	5	72177068	72177068	+	0.000170779	0.000621201	-25.29
705	NM_173403	Slc10a4	2364	978	+	5	73007880	73007880	+	3.04781e-06	1.80606e-05	-26.1962
706	NM_173403	Slc10a4	2365	43674	+	5	73050576	73050576	+	3.35986e-14	8.1732e-13	-35.4058
707	NM_177561	Usp46	2367	-8858	-	5	74077268	74077268	+	6.04335e-07	4.22611e-06	-28.6372
708	NM_177561	Usp46	2368	-8859	-	5	74077269	74077269	-	3.02945e-10	4.06676e-09	-41.7389
709	NM_153801	Tecrl	2375	-95301	-	5	83450495	83450495	+	3.12959e-13	6.68929e-12	-29.472
710	NM_133894	Ugt2b38	2380	-3422	-	5	87427624	87427624	-	1.16774e-07	9.5662e-07	-26.883
711	NM_178700	Grsf1	2381	-3299	-	5	88679469	88679469	+	1.15003e-06	7.53721e-06	26.9231
712	NM_008096	Gc	2383	56255	-	5	89401644	89401644	+	0.000224746	0.000786777	25.1885
713	NM_145146	Afm	2384	-14028	+	5	90504921	90504921	+	1.95755e-06	1.2156e-05	26.4716
714	NM_001080795	G3bp2	2386	-7697	-	5	92091440	92091440	+	0.000171942	0.000624771	-30.2919
715	NM_181850	Grm3	2314	36978	-	5	9688375	9688375	+	2.29944e-06	1.40202e-05	-26.5643
716	NM_133738	Antxr2	2392	-38257	-	5	98069218	98069218	+	1.67366e-15	4.81016e-14	55.1886
717	NM_198612	Gxylt2	2649	45797	+	6	100750529	100750529	-	6.91874e-10	8.76951e-09	27.797
718	NM_008370	Il5ra	2654	-1808	-	6	106750844	106750844	-	0.000616008	0.00186165	-27.1792
719	NM_178391	Setmar	2656	-105189	+	6	107959856	107959856	-	0.000494092	0.00154346	-27.2737
720	NM_010585	Itpr1	2657	93392	+	6	108306486	108306486	-	1.35217e-14	3.45481e-13	-25.6589
721	NM_010585	Itpr1	2658	93423	+	6	108306517	108306517	-	3.38595e-22	1.93339e-20	-28.784
722	NM_010585	Itpr1	2659	93972	+	6	108307066	108307066	-	7.26334e-134	1.88085e-130	-49.6245
723	NM_029780	Raf1	2664	-10564	-	6	115687198	115687198	+	6.09026e-89	8.52473e-86	-36.8274
724	NM_026376	Plxnd1	2666	-14013	-	6	116009017	116009017	-	5.27195e-08	4.65453e-07	-36.5148
725	NM_001011800	Olfr212	2667	-2966	+	6	116503550	116503550	-	1.2116e-09	1.46541e-08	-32.1181
726	NM_010886	Ndufa4	2534	171282	-	6	11736165	11736165	-	1.02494e-05	5.32096e-05	25.3378
727	NM_194339	Bms1	2670	31224	-	6	118388194	118388194	+	5.64293e-05	0.000238161	27.0267
728	NM_015776	Mfap5	2678	9556	+	6	122523230	122523230	+	9.80467e-14	2.24485e-12	-39.6367
729	NM_015776	Mfap5	2679	9588	+	6	122523262	122523262	+	1.00798e-06	6.68331e-06	-27.6657
730	NM_181344	C1rl	2683	-7029	+	6	124486084	124486084	-	1.23676e-06	8.05077e-06	-27.7499
731	NM_026743	Tspan11	2692	3734	+	6	127891354	127891354	-	9.00974e-19	3.72696e-17	-53.0233
732	NM_001080979	Tead4	2694	-24213	-	6	128325025	128325025	+	2.44889e-07	1.872e-06	-27.7026
733	NM_001001179	A2ml1	2696	-6077	-	6	128587682	128587682	-	6.08385e-12	1.06555e-10	28.6122
734	NM_027992	Tmem106b	2535	47770	+	6	13117527	13117527	+	1.38991e-14	3.54949e-13	-30.3324
735	NM_027992	Tmem106b	2536	47838	+	6	13117595	13117595	+	1.16599e-12	2.28564e-11	-44.4409
736	NM_001177588	Gm8882	2699	-11320	-	6	132375453	132375453	+	1.00139e-13	2.29175e-12	-32.04
737	NM_207023	Tas2r120	2700	15209	+	6	132672164	132672164	+	9.61697e-23	5.85957e-21	-34.4699
738	NM_001288627	Emp1	2707	68161	+	6	135435652	135435652	+	6.47694e-16	1.97784e-14	47.0837
739	NM_001288627	Emp1	2708	68220	+	6	135435711	135435711	+	0.000206704	0.000731518	28.8012
740	NM_008597	Mgp	2713	-8309	-	6	136884113	136884113	-	6.17332e-11	9.29139e-10	-36.3449
741	NM_181988	Rerg	2714	-3846	-	6	137174341	137174341	-	5.48242e-07	3.87149e-06	-30.3797
742	NM_181988	Rerg	2715	-3911	-	6	137174406	137174406	-	1.57225e-08	1.5378e-07	-28.7796
743	NM_207683	Pik3c2g	2716	105507	+	6	139719577	139719577	+	3.89133e-16	1.22141e-14	27.5931
744	NM_207683	Pik3c2g	2717	110656	+	6	139724726	139724726	-	6.61053e-08	5.71075e-07	-29.2763
745	NM_011084	Pik3c2g	2718	-108521	+	6	139732924	139732924	+	2.79807e-12	5.1847e-11	-43.6966
746	NM_011084	Pik3c2g	2719	13884	+	6	139855327	139855327	+	8.91536e-23	5.45132e-21	-44.9465
747	NM_001242345	Spx	2726	19375	+	6	142432804	142432804	+	6.03601e-16	1.84974e-14	-27.409
748	NM_001242345	Spx	2727	19424	+	6	142432853	142432853	+	2.75752e-27	2.35664e-25	-35.5084
749	NM_007604	Capza2	2542	-45347	+	6	17591751	17591751	-	3.62113e-16	1.13936e-14	-35.8408
750	NM_001289624	St7	2543	14460	+	6	17708452	17708452	-	7.62644e-09	7.94519e-08	-28.91
751	NM_029848	Hyal4	2549	942	+	6	24749307	24749307	-	1.40509e-36	2.19848e-34	49.0156
752	NM_007563	Bpgm	2565	1453	+	6	34477807	34477807	-	0.000298758	0.00100316	25.5488
753	NM_203491	Chrm2	2567	-97990	+	6	36290094	36290094	-	7.04693e-15	1.8611e-13	-27.7833
754	NM_080467	Atp6v0a4	2570	-18261	-	6	38142846	38142846	+	3.17981e-07	2.36783e-06	-35.0013
755	NM_001004182	Tmem178b	2576	-9770	+	6	40100483	40100483	+	1.28153e-51	3.85874e-49	-30.2627
756	NM_181275	Tas2r139	2579	21701	+	6	42162635	42162635	-	1.36564e-09	1.63378e-08	50.3344
757	NM_146655	Olfr441	2581	-5129	+	6	43110615	43110615	-	2.4654e-19	1.07568e-17	35.0786
758	NM_010451	Hoxa2	2593	1445	-	6	52163387	52163387	-	1.82817e-47	4.85544e-45	36.7933
759	NM_145567	Hibadh	2594	-8624	-	6	52648923	52648923	+	1.11828e-05	5.74847e-05	26.1932
760	NM_175524	Qrfprl	2598	-26294	+	6	65355000	65355000	-	3.34524e-26	2.6613e-24	-46.2247
761	NM_175524	Qrfprl	2599	43515	+	6	65424807	65424807	+	1.10714e-07	9.11877e-07	-30.0624
762	NM_175524	Qrfprl	2600	43550	+	6	65424842	65424842	+	2.55746e-05	0.000118641	-28.7483
763	NM_009075	Rpia	2606	30033	-	6	70762143	70762143	+	1.80187e-10	2.5133e-09	26.9576
764	NM_009075	Rpia	2607	29973	-	6	70762203	70762203	+	1.42489e-06	9.15138e-06	35.0698
765	NM_001160127	Smyd1	2608	4092	-	6	71258190	71258190	+	4.66716e-05	0.000201511	-27.8961
766	NM_009858	Cd8b1	2610	14537	+	6	71337347	71337347	-	7.72269e-06	4.13651e-05	-26.5464
767	NM_178608	Reep1	2611	-24063	+	6	71683618	71683618	+	1.21584e-16	4.04942e-15	-33.1895
768	NM_198622	H1f10	2630	10731	-	6	87970752	87970752	-	2.77834e-23	1.76074e-21	-25.5812
769	NM_053219	Vmn1r47	2634	-16602	+	6	90005286	90005286	+	4.18757e-31	4.46244e-29	-40.5973
770	NM_053219	Vmn1r47	2635	-15940	+	6	90005948	90005948	+	3.60836e-60	1.55731e-57	-26.5349
771	NM_009527	Wnt7a	2639	10820	-	6	91400550	91400550	+	8.12555e-10	1.0133e-08	27.3944
772	NM_009531	Xpc	2640	12899	-	6	91502990	91502990	-	1.01179e-09	1.24231e-08	25.2172
773	NM_182808	Tafa1	2641	-49659	+	6	96063495	96063495	-	6.80798e-13	1.38923e-11	-27.4369
774	NM_026010	Lipt2	2868	-9329	+	7	100149948	100149948	-	1.12285e-08	1.13269e-07	-41.6231
775	NM_026010	Lipt2	2869	-9288	+	7	100149989	100149989	-	2.59467e-07	1.97093e-06	-35.7377
776	NM_001190381	Olfr596	2873	-8124	+	7	103301599	103301599	-	0.00018459	0.00066393	27.4891
777	NM_147044	Olfr679	2875	-5403	+	7	105080315	105080315	-	2.86866e-12	5.30221e-11	29.7187
778	NM_029660	Rbmxl2	2876	46410	+	7	107255853	107255853	-	8.38516e-19	3.48529e-17	-37.1589
779	NM_001011871	Olfr506	2878	-11770	+	7	108600539	108600539	-	3.55793e-15	9.75702e-14	32.6809
780	NM_053247	Lyve1	2879	3592	-	7	110859362	110859362	-	5.4005e-06	3.01685e-05	29.9764
781	NM_145584	Spon1	2882	-9391	+	7	113756607	113756607	-	1.19196e-06	7.79146e-06	-28.9956
782	NM_025846	Rras2	2883	-39098	-	7	114156878	114156878	-	4.62456e-07	3.31497e-06	29.9053
783	NM_001024138	Gpr139	2887	-1272	-	7	119185645	119185645	+	1.01179e-11	1.72428e-10	-30.6632
784	NM_019430	Cacng3	2889	-101972	+	7	122569772	122569772	+	0.000625192	0.0018849	25.5932
785	NM_019430	Cacng3	2890	-94779	+	7	122576965	122576965	-	4.40803e-05	0.00019181	-25.0877
786	NM_019430	Cacng3	2891	-44064	+	7	122627680	122627680	-	4.21839e-12	7.5674e-11	-30.6961
787	NM_001104644	Vmn2r53	2777	7012	-	7	12599533	12599533	-	2.21403e-08	2.10587e-07	-40.2902
788	NM_008257	Hmx3	2901	2603	+	7	131545564	131545564	+	2.91218e-07	2.18519e-06	-32.8279
789	NM_145998	Hmx2	2902	1117	+	7	131555177	131555177	+	0.00145209	0.00385779	25.8772
790	NM_028654	Tex36	2906	15435	-	7	133586681	133586681	+	1.22142e-28	1.1196e-26	29.3169
791	NM_007400	Adam12	2907	-42301	-	7	134267397	134267397	-	2.91463e-08	2.71052e-07	25.8516
792	NM_001143802	Insyn2a	2909	-78746	-	7	135017175	135017175	-	5.10818e-09	5.51496e-08	-33.4254
793	NM_001316680	Ptpre	2910	3127	+	7	135596606	135596606	+	6.78828e-12	1.18173e-10	-32.5253
794	NM_183289	Tcerg1l	2915	19837	-	7	138377894	138377894	+	1.64739e-05	8.07787e-05	-31.9225
795	NM_009475	Prap1	2917	1775	+	7	140095169	140095169	+	1.87813e-05	9.05496e-05	-25.4014
796	NM_008554	Ascl2	2920	7224	-	7	142962041	142962041	-	0.000238573	0.000827188	-29.6964
797	NM_145710	Obox6	2779	59	-	7	15839621	15839621	-	4.55702e-12	8.14102e-11	33.0431
798	NM_025957	Ceacam14	2781	-42586	+	7	17770096	17770096	-	8.15792e-22	4.50906e-20	-35.2713
799	NM_025957	Ceacam14	2782	-42579	+	7	17770103	17770103	-	6.07988e-17	2.10339e-15	-28.2573
800	NM_020486	Bcam	2783	2941	-	7	19767592	19767592	-	1.39925e-09	1.67013e-08	-30.1485
801	NM_027514	Pvr	2784	-600	-	7	19921742	19921742	+	3.82699e-08	3.46928e-07	-27.4723
802	NM_001004194	Nlrp4e	2785	28880	+	7	23330070	23330070	+	0.00182417	0.00468157	25.577
803	NM_001166718	Vmn1r173	2786	-8248	+	7	23694094	23694094	-	1.28139e-16	4.25405e-15	-26.7894
804	NM_001166727	Vmn1r175	2787	-6670	-	7	23815869	23815869	+	6.37403e-19	2.6708e-17	-38.309
805	NM_028775	Cyp2s1	2792	-4278	-	7	25820807	25820807	+	3.19223e-06	1.88298e-05	31.3023
806	NM_001081115	Nccrp1	2794	2383	-	7	28544872	28544872	+	2.30695e-08	2.18743e-07	25.7757
807	NM_146185	Zfp790	2798	3627	+	7	29819697	29819697	+	3.8484e-11	5.97449e-10	-26.4026
808	NM_001281508	Scgb2b12	2802	23214	-	7	32304032	32304032	+	2.45952e-11	3.96325e-10	-33.5437
809	NM_001281508	Scgb2b12	2803	23168	-	7	32304078	32304078	+	2.88246e-08	2.68591e-07	-28.7698
810	NM_026181	Gpatch1	2806	-221	-	7	35318660	35318660	+	1.25921e-08	1.25485e-07	-32.1212
811	NM_027897	Rhpn2	2807	24361	+	7	35358596	35358596	+	1.74763e-08	1.69717e-07	-27.5004
812	NM_001302676	Lair1	2770	-4633	-	7	4067836	4067836	-	8.34736e-13	1.67887e-11	34.9825
813	NM_001302676	Lair1	2771	-4639	-	7	4067842	4067842	-	1.42235e-13	3.18891e-12	34.6267
814	NM_001302676	Lair1	2772	-4672	-	7	4067875	4067875	-	3.8959e-08	3.52435e-07	27.3796
815	NM_001309388	Zfp141	2820	26344	-	7	42479410	42479410	+	8.37133e-14	1.93377e-12	-43.1013
816	NM_001105060	Vmn2r63	2821	-33181	-	7	42966969	42966969	+	1.39033e-07	1.11948e-06	-40.0539
817	NM_019928	Klk4	2824	18213	+	7	43899383	43899383	+	3.03262e-10	4.06995e-09	-26.7634
818	NM_001163014	Gp6	2773	3504	-	7	4394241	4394241	-	0.000531421	0.00164312	26.1081
819	NM_001033176	Slc6a21	2826	5615	+	7	45288486	45288486	-	9.46307e-05	0.000373205	-30.9942
820	NM_183406	Cox6b2	2775	3964	-	7	4748939	4748939	-	5.5701e-11	8.45474e-10	-34.5816
821	NM_178705	Luzp2	2834	662	+	7	54835905	54835905	+	9.7557e-06	5.09015e-05	-27.0076
822	NM_008074	Gabrg3	2836	520	-	7	57386352	57386352	+	8.81833e-06	4.64978e-05	25.553
823	NM_007390	Chrna7	2838	325003	-	7	62887524	62887524	-	1.53778e-23	9.95519e-22	-45.3002
824	NM_007390	Chrna7	2839	-32926	-	7	63245451	63245451	-	2.23104e-26	1.79418e-24	-45.6256
825	NM_001039104	Trpm1	2841	14492	+	7	64168325	64168325	-	2.07101e-10	2.85792e-09	-25.9347
826	NM_001290994	Usp29	2776	23806	+	7	6754387	6754387	+	3.64737e-28	3.23455e-26	-30.8054
827	NM_010513	Igf1r	2844	60006	+	7	68012261	68012261	-	9.37311e-87	1.12892e-83	-31.337
828	NM_153579	Sv2b	2853	-35049	-	7	75344310	75344310	-	4.42573e-32	5.03756e-30	-60.9179
829	NM_001190374	Adamtsl3	2858	61874	+	7	82397566	82397566	-	3.57329e-11	5.5859e-10	29.2217
830	NM_146415	Olfr291	2861	19435	+	7	84873004	84873004	+	9.20014e-12	1.57513e-10	-26.9777
831	NM_028238	Rab38	2862	73366	+	7	88503637	88503637	-	8.10183e-09	8.3835e-08	-38.7179
832	NM_001310762	Tenm4	2864	-147835	+	7	96023409	96023409	-	2.45719e-06	1.48933e-05	-27.3504
833	NM_001310762	Tenm4	2865	-74852	+	7	96096392	96096392	+	2.17071e-14	5.39967e-13	-46.0984
834	NM_175105	Aqp11	2866	911	-	7	97737337	97737337	-	1.04133e-06	6.88326e-06	30.6969
835	NM_178220	Arrb1	2867	-2386	+	7	99533100	99533100	-	3.07237e-06	1.81912e-05	-29.4872
836	NM_033622	Tnfsf13b	2932	58563	+	8	10065194	10065194	+	1.94161e-18	7.82536e-17	-35.7072
837	NM_001081333	Plekhg4	3066	18756	+	8	105394135	105394135	-	6.01959e-07	4.21177e-06	25.2315
838	NM_010817	Psmd7	3069	-15754	-	8	107604235	107604235	+	5.53152e-07	3.9035e-06	26.8737
839	NM_010817	Psmd7	3070	-15957	-	8	107604438	107604438	-	3.01174e-08	2.78981e-07	-28.5597
840	NM_010817	Psmd7	3071	-20448	-	8	107608929	107608929	-	2.17795e-19	9.55899e-18	48.3253
841	NM_009954	Bcar1	3083	838	-	8	111743012	111743012	+	8.36398e-08	7.07912e-07	31.5077
842	NM_026693	Gabarapl2	3084	8413	+	8	111949114	111949114	-	4.40563e-12	7.88962e-11	-38.8895
843	NM_029297	Dynlrb2	3095	-48424	+	8	116456591	116456591	-	2.4259e-21	1.27952e-19	-38.8896
844	NM_028941	Cmip	3098	2663	+	8	117351831	117351831	+	7.7236e-06	4.13657e-05	-35.2174
845	NM_172285	Plcg2	3100	-4299	+	8	117493976	117493976	-	2.53203e-09	2.89033e-08	25.0855
846	NM_024219	Hsbp1	3104	-59662	+	8	119284876	119284876	+	5.19458e-18	2.00468e-16	-39.5278
847	NM_008320	Irf8	3106	-4207	+	8	120732151	120732151	-	9.2878e-13	1.85506e-11	35.1782
848	NM_008320	Irf8	3107	-4187	+	8	120732171	120732171	-	5.55965e-12	9.81037e-11	28.612
849	NM_016738	Rpl13	3111	-5842	+	8	123096508	123096508	-	9.5249e-32	1.0518e-29	-29.6631
850	NM_172287	Spire2	3112	8377	+	8	123341088	123341088	-	1.57297e-06	9.99956e-06	32.2315
851	NM_009233	Sox1	2940	15845	+	8	12411362	12411362	-	5.7841e-23	3.57469e-21	-34.7021
852	NM_009233	Sox1	2941	34677	+	8	12430194	12430194	-	3.95631e-08	3.57396e-07	25.3354
853	NM_009233	Sox1	2942	34679	+	8	12430196	12430196	-	2.75462e-07	2.0778e-06	26.3789
854	NM_171824	Pgbd5	3115	70291	-	8	124363646	124363646	-	1.07953e-17	4.05724e-16	-25.7663
855	NM_025834	Proz	2946	232	+	8	13061138	13061138	-	4.67256e-05	0.000201711	-26.0941
856	NM_172910	Dlgap2	2947	83470	+	8	14179343	14179343	-	1.37505e-21	7.4181e-20	-25.5825
857	NM_001177408	Gm15319	2958	9458	-	8	20353745	20353745	+	5.29483e-06	2.9635e-05	-28.6272
858	NM_139225	Defb10	2959	10603	+	8	21869502	21869502	+	0.000337357	0.00111094	-32.684
859	NM_177089	Tacc1	2964	2559	-	8	25198984	25198984	+	2.87912e-09	3.24716e-08	-26.9729
860	NM_173212	Chrnb3	2971	12794	+	8	27381503	27381503	+	1.5079e-21	8.08427e-20	-27.7734
861	NM_173212	Chrnb3	2972	19067	+	8	27387776	27387776	-	2.58408e-47	6.75908e-45	-36.7107
862	NM_153135	Unc5d	2976	235735	-	8	28983902	28983902	+	7.12279e-34	9.19925e-32	-43.2007
863	NM_153135	Unc5d	2977	173479	-	8	29046158	29046158	+	1.72219e-06	1.08335e-05	26.0306
864	NM_153135	Unc5d	2978	140948	-	8	29078689	29078689	+	9.1495e-16	2.74697e-14	-46.8462
865	NM_031374	Tex15	2982	-13443	+	8	33557101	33557101	-	5.16486e-08	4.56699e-07	-26.1325
866	NM_019733	Rbpms	2985	13127	-	8	33916737	33916737	+	1.53414e-38	2.68423e-36	-26.0197
867	NM_177741	Ppp1r3b	2989	1157	+	8	35376896	35376896	+	3.21631e-08	2.96129e-07	-29.6431
868	NM_001081150	Lonrf1	2990	-34161	-	8	36283676	36283676	-	6.98484e-07	4.79705e-06	28.9867
869	NM_022984	Retn	2923	-11863	+	8	3643907	3643907	-	7.70481e-06	4.12906e-05	-26.9663
870	NM_030610	Fgf20	2993	-7672	-	8	40294624	40294624	+	5.95737e-08	5.19853e-07	-27.1353
871	NM_026956	Cd209f	2925	12035	-	8	4093730	4093730	-	2.05808e-11	3.34972e-10	-33.6827
872	NM_026278	Lrp2bp	2997	634	+	8	46011234	46011234	-	8.39405e-05	0.000336581	31.6214
873	NM_177304	Enpp6	2999	29881	+	8	47016804	47016804	+	1.02553e-19	4.63457e-18	26.6627
874	NM_175162	Stox2	3000	6936	-	8	47345413	47345413	-	5.4574e-07	3.85602e-06	-31.8301
875	NM_029383	Cldn22	3002	34077	+	8	47858557	47858557	+	5.26051e-11	8.01536e-10	-27.1692
876	NM_011388	Slc10a2	2926	-667949	-	8	5773235	5773235	+	2.92171e-07	2.19171e-06	-34.6212
877	NM_001033429	Trim75	3020	-5406	-	8	64993049	64993049	-	8.05817e-27	6.66666e-25	-45.4792
878	NM_027626	Psd3	3024	17981	-	8	67800315	67800315	-	1.59949e-20	7.82225e-19	-26.1692
879	NM_008509	Lpl	3026	-38381	+	8	68842174	68842174	-	6.5341e-07	4.5259e-06	-27.2523
880	NM_001113346	Gatad2a	3027	20332	-	8	69954052	69954052	+	9.98184e-08	8.30324e-07	25.4828
881	NM_023217	Pgpep1	3028	7734	-	8	70652005	70652005	-	2.68664e-07	2.03319e-06	25.9804
882	NM_183096	Ttc29	3029	76539	+	8	78289879	78289879	+	9.72194e-11	1.41671e-09	-42.4497
883	NM_030145	Lsm6	3031	-15344	-	8	78836495	78836495	+	1.53355e-06	9.7715e-06	28.3989
884	NM_007578	Cacna1a	3037	33088	+	8	84448450	84448450	-	2.50953e-08	2.36349e-07	26.9985
885	NM_001310520	Zfp423	3040	-42976	-	8	87847414	87847414	+	5.99622e-09	6.3793e-08	26.8736
886	NM_001109756	Adcy7	3041	-3958	+	8	88279034	88279034	+	7.2571e-08	6.21438e-07	35.3674
887	NM_010241	Aktip	3047	-35618	-	8	91171111	91171111	+	1.16724e-15	3.45833e-14	29.1565
888	NM_001301137	Irx6	3052	-157281	+	8	92517008	92517008	-	1.9667e-19	8.66853e-18	-41.0895
889	NM_008630	Mt2	3053	641	+	8	94173257	94173257	-	2.56333e-10	3.48439e-09	26.7841
890	NM_173446	Fam155a	2930	90837	-	8	9680187	9680187	+	1.51607e-22	9.02498e-21	-25.6791
891	NM_025835	Pccb	3220	58132	-	9	100976753	100976753	-	5.007e-12	8.89581e-11	-25.9668
892	NM_001100451	Msl2	3221	20821	+	9	101095581	101095581	-	5.74863e-08	5.03845e-07	-25.1315
893	NM_019704	Tmem115	3229	-19705	+	9	107514240	107514240	-	8.72855e-09	8.98176e-08	26.4935
894	NM_177070	Fbxw16	3231	-4153	-	9	109453292	109453292	-	1.10907e-09	1.35278e-08	29.1935
895	NM_146227	Prss50	3233	10201	+	9	110868166	110868166	+	1.24471e-08	1.24202e-07	30.2081
896	NM_146227	Prss50	3234	10235	+	9	110868200	110868200	+	6.74669e-28	5.89227e-26	58.0747
897	NM_146227	Prss50	3235	10421	+	9	110868386	110868386	-	2.81668e-18	1.12126e-16	44.7867
898	NM_146229	Dync1li1	3239	-18579	+	9	114670252	114670252	+	1.21339e-11	2.04097e-10	25.0625
899	NM_028638	Gadl1	3243	4914	+	9	115914367	115914367	-	1.96866e-08	1.89195e-07	26.5293
900	NM_008614	Mobp	3253	30924	+	9	120180664	120180664	+	4.00935e-06	2.31179e-05	-26.71
901	NM_023277	Jam3	3137	-55132	-	9	27210552	27210552	+	1.43595e-15	4.19729e-14	-25.1196
902	NM_177906	Opcml	3138	229482	+	9	28020749	28020749	-	8.87055e-10	1.1009e-08	39.2621
903	NM_013800	Barx2	3148	4048	-	9	31909238	31909238	+	1.07807e-11	1.8276e-10	30.7542
904	NM_177379	Arhgap32	3149	-20895	+	9	32203354	32203354	-	3.53154e-14	8.55866e-13	-34.9315
905	NM_008026	Fli1	3150	26284	-	9	32515169	32515169	+	2.81234e-41	5.60197e-39	27.8198
906	NM_013932	Ddx25	3151	4718	-	9	35553753	35553753	-	3.72279e-45	8.84419e-43	31.9424
907	NM_146613	Olfr229	3153	-4365	+	9	39905440	39905440	+	2.64445e-12	4.91411e-11	32.3567
908	NM_146854	Olfr982	3154	2562	+	9	40076857	40076857	+	4.19346e-11	6.46175e-10	28.6058
909	NM_009692	Apoa1	3162	-22218	+	9	46206412	46206412	+	3.09243e-09	3.46961e-08	-32.392
910	NM_012039	Zw10	3165	-2442	+	9	49053139	49053139	-	2.71939e-11	4.34148e-10	-44.1782
911	NM_030709	Tmprss5	3166	22197	+	9	49124974	49124974	+	1.07549e-09	1.31491e-08	-36.1849
912	NM_030709	Tmprss5	3167	58631	+	9	49161408	49161408	-	5.92704e-11	8.95716e-10	28.1225
913	NM_001033535	Tnfaip8l3	3172	32829	-	9	54035583	54035583	-	0.000546905	0.00168296	27.0833
914	NM_001033535	Tnfaip8l3	3173	19335	-	9	54049077	54049077	-	2.78999e-12	5.17158e-11	30.5396
915	NM_001163758	Skor1	3184	-48404	-	9	63197364	63197364	+	5.2064e-16	1.61268e-14	-29.6825
916	NM_028116	Pygo1	3194	1306	+	9	72926954	72926954	+	1.03761e-20	5.16708e-19	28.3976
917	NM_023814	Tbx18	3199	148165	-	9	87583096	87583096	+	1.08377e-16	3.63761e-15	-31.1592
918	NM_023814	Tbx18	3200	3798	-	9	87727463	87727463	+	8.57965e-11	1.26341e-09	-25.0859
919	NM_001312649	Ctsh	3206	-6572	+	9	90047695	90047695	+	4.33826e-13	9.09263e-12	-26.4112
920	NM_011961	Plod2	3207	-3686	+	9	92538537	92538537	-	7.93998e-05	0.000320844	27.381
921	NM_018763	Chst2	3209	20014	-	9	95387257	95387257	+	2.409e-11	3.88547e-10	25.8257
922	NM_018763	Chst2	3210	-10508	-	9	95417777	95417777	+	6.42639e-30	6.35159e-28	-25.6257
923	NM_001311135	Rnf7	3214	-393	-	9	96479067	96479067	-	4.71807e-19	1.99306e-17	-38.8487
924	NM_028033	Prr23a3	3217	-372	+	9	98864395	98864395	-	7.63573e-13	1.54414e-11	28.4432
925	NM_012020	Foxl2	3218	8979	+	9	98964584	98964584	-	1.12632e-12	2.21207e-11	-26.9239
926	NM_001302496	Gjb1	3319	-8134	+	X	101368242	101368242	+	2.90148e-31	3.12407e-29	-40.5839
927	NM_013712	Itgb1bp2	3321	-4460	+	X	101444649	101444649	+	2.5176e-16	8.05353e-15	-48.6869
928	NM_009910	Cxcr3	3323	28170	-	X	101705978	101705978	-	7.84299e-23	4.80697e-21	-29.1534
929	NM_009440	Tsx	3326	81	+	X	103414546	103414546	+	9.40691e-09	9.62815e-08	-25.645
930	NM_173436	Cypt2	3330	-36351	+	X	105463421	105463421	+	2.58087e-11	4.13563e-10	-38.3508
931	NM_001033252	Wmp	3331	-362981	-	X	108311416	108311416	-	1.08833e-05	5.61177e-05	-27.0944
932	NM_001290478	Klhl4	3336	-248840	+	X	114225493	114225493	+	1.29159e-12	2.51567e-11	29.6073
933	NM_001142750	Tgif2lx2	3338	-539372	+	X	117887855	117887855	-	2.83762e-07	2.13357e-06	-34.9519
934	NM_138742	Nap1l3	3339	513256	-	X	121884130	121884130	-	1.3174e-07	1.06607e-06	-31.8333
935	NM_138742	Nap1l3	3340	242472	-	X	122154914	122154914	-	1.61538e-07	1.28353e-06	-27.8
936	NM_138742	Nap1l3	3341	53099	-	X	122344287	122344287	+	1.23568e-06	8.04475e-06	-25.9591
937	NM_001310652	Cldn34c2	3342	-60367	+	X	123043156	123043156	+	2.52618e-70	1.63539e-67	32.6017
938	NM_001310652	Cldn34c1	3342	-60367	+	X	123043156	123043156	+	2.52618e-70	1.63539e-67	32.6017
939	NM_172493	Diaph2	3343	711201	+	X	130460941	130460941	-	2.77512e-24	1.90615e-22	-44.9795
940	NM_019868	Hnrnph2	3345	342	+	X	134601519	134601519	+	6.21982e-07	4.33488e-06	-29.1005
941	NM_027952	Tcp11x2	3346	15740	-	X	135678051	135678051	+	1.76854e-32	2.07694e-30	29.5459
942	NM_030688	Il1rapl2	3351	-146315	+	X	137424439	137424439	-	2.009e-05	9.59041e-05	29.0873
943	NM_030688	Il1rapl2	3352	3485	+	X	137574237	137574237	+	3.49478e-16	1.10161e-14	25.9035
944	NM_011635	Trap1a	3353	-1809	+	X	139331874	139331874	-	1.97781e-07	1.54147e-06	-28.2311
945	NM_011635	Trap1a	3354	-1805	+	X	139331878	139331878	+	2.10434e-05	9.98157e-05	-26.1376
946	NM_207625	Acsl4	3356	189	-	X	142390347	142390347	+	2.94047e-09	3.31275e-08	27.1568
947	NM_008312	Htr2c	3357	-2363	+	X	146960150	146960150	+	6.75657e-08	5.82138e-07	27.5949
948	NM_001168600	Gnl3l	3358	51104	-	X	150966190	150966190	+	3.10495e-17	1.10367e-15	-46.4474
949	NM_016763	Hsd17b10	3359	3281	+	X	152005175	152005175	-	3.87029e-14	9.34465e-13	-30.4682
950	NM_001310461	Cypt1	3268	-384923	+	X	16137946	16137946	+	8.15064e-10	1.01618e-08	-25.0348
951	NM_009759	Bmx	3368	-383	-	X	164258575	164258575	+	4.60789e-07	3.30576e-06	-27.7855
952	NM_001313746	Fundc1	3269	839	-	X	17571169	17571169	+	1.77519e-19	7.88483e-18	38.8976
953	NM_001313746	Fundc1	3270	643	-	X	17571365	17571365	-	4.57376e-06	2.60274e-05	30.9173
954	NM_001310466	Klhl13	3274	393370	-	X	22873433	22873433	-	7.81694e-08	6.64871e-07	29.3426
955	NM_001040669	Gm5169	3275	-46178	-	X	25347632	25347632	+	1.6591e-46	4.23276e-44	-59.8806
956	NM_026573	Upf3b	3276	5610	-	X	37104713	37104713	-	7.29801e-10	9.19397e-09	-35.3998
957	NM_001191032	Cypt14	3278	-354082	-	X	40217685	40217685	-	1.72031e-07	1.36002e-06	-29.0804
958	NM_001290451	Gria3	3279	50	+	X	41401577	41401577	-	4.50865e-17	1.58093e-15	-27.6943
959	NM_053123	Smarca1	3280	145649	-	X	47746904	47746904	-	1.41976e-07	1.14123e-06	-27.7323
960	NM_012019	Aifm1	3281	15270	-	X	48498294	48498294	-	1.67457e-16	5.47168e-15	-39.2492
961	NM_009237	Sox3	3288	16725	-	X	60876706	60876706	+	3.24551e-14	7.9136e-13	41.42
962	NM_025410	Lage3	3295	7167	-	X	74346452	74346452	+	6.48473e-07	4.49953e-06	-35.1501
963	NM_181584	Gm38425	3296	8504	-	X	75076402	75076402	-	3.31317e-08	3.04398e-07	-29.2076
964	NM_181584	Gab3	3296	8504	-	X	75076402	75076402	-	3.31317e-08	3.04398e-07	-29.2076
965	NM_181584	Gab3	3297	8450	-	X	75076456	75076456	-	6.07078e-08	5.28947e-07	-25.1545
966	NM_181584	Gm38425	3297	8450	-	X	75076456	75076456	-	6.07078e-08	5.28947e-07	-25.1545
967	NM_181584	Gab3	3298	8437	-	X	75076469	75076469	-	2.09792e-10	2.89351e-09	-25.2
968	NM_181584	Gm38425	3298	8437	-	X	75076469	75076469	-	2.09792e-10	2.89351e-09	-25.2
969	NM_008621	Mpp1	3299	12416	-	X	75118601	75118601	+	5.95185e-11	8.98941e-10	-27.3358
970	NM_001201395	Cldn34d	3304	-267069	-	X	76869992	76869992	+	8.1248e-09	8.40391e-08	-25.8497
971	NM_138602	Praf2	3256	4191	+	X	7732760	7732760	+	5.42324e-13	1.12438e-11	26.725
972	NM_008423	Kcnd1	3257	233	+	X	7823990	7823990	+	0.000209991	0.000741288	25.7077
973	NM_008821	Dcaf8l	3307	515	-	X	89409175	89409175	-	9.19404e-12	1.5746e-10	-36.7521
974	NM_001305940	Arx	3312	-36466	+	X	93250041	93250041	+	2.86588e-19	1.24308e-17	25.1507
975	NM_001305940	Arx	3313	-1883	+	X	93284624	93284624	+	2.36138e-08	2.23331e-07	26.1364
976	NM_008179	Gspt2	3315	1759	+	X	94637826	94637826	+	3.93682e-11	6.09864e-10	-48.0605
977	NM_001081473	Zxdb	3316	-21459	+	X	94703110	94703110	-	3.86863e-08	3.50151e-07	-34.2059
978	NM_178753	Spin4	3318	-9059	-	X	95035740	95035740	-	1.86069e-10	2.58699e-09	-28.2642

## Sheet: Table_S12_Unique_Comb_DMG_DEG
S.No	Feature name	Genes	logFC	Average expression	t	P-Value	adj.P-Value	q-value	B	Target row	Distance to feature	Feature strand	Chromosome	Start	End	Strand	Methylation difference
1	NM_001033303	Ampd1	4.97359	-0.588288	6.89329	1.94e-06	0.000650581	1.29439e-13	5.20626	2069	7775	+	3	103081787	103081787	+	-38.0714
2	NM_172124	B3gat2	0.697586	2.26823	3.95103	0.00094132	0.0674734	0.00102415	-1.03728	12	-91282	+	1	23670644	23670644	+	-25.1558
3	NM_172124	B3gat2	0.697586	2.26823	3.95103	0.00094132	0.0674734	0.000670021	-1.03728	13	-91254	+	1	23670672	23670672	+	30.9066
4	NM_001109761	Capn3	2.28754	0.077346	3.91566	0.00101839	0.0719503	1.40843e-05	-0.956681	1866	17954	+	2	120494861	120494861	-	-26.0411
5	NM_001109761	Capn3	2.28754	0.077346	3.91566	0.00101839	0.0719503	9.70792e-08	-0.956681	1865	16935	+	2	120493842	120493842	-	-42.7721
6	NM_001164804	Coro2a	-0.769059	5.49627	-3.79919	0.00131975	0.0877811	4.74461e-26	-1.87834	2169	3511	-	4	46598419	46598419	-	-39.6313
7	NM_013712	Itgb1bp2	1.9234	0.505476	3.73698	0.00151566	0.0949283	8.05353e-15	-1.38888	3321	-4460	+	X	101444649	101444649	+	-48.6869
8	NM_177006	Nwd2	-1.85433	-4.2943	-3.75548	0.00145455	0.0924742	5.35023e-33	-0.968799	2355	18467	+	5	63667568	63667568	+	-64.2844
9	NM_001289701	Pde4dip	1.04027	5.18513	3.75519	0.00145549	0.0924742	6.17645e-15	-1.99111	2065	19216	-	3	97869492	97869492	-	43.0509
10	NM_133364	Prima1	2.44387	-5.2896	6.98988	1.61e-06	0.000580115	3.87691e-18	4.89074	692	82047	-	12	103160100	103160100	-	26.8056
11	NM_133364	Prima1	2.44387	-5.2896	6.98988	1.61e-06	0.000580115	2.156e-31	4.89074	693	74036	-	12	103168111	103168111	+	-30.1459
12	NM_001160127	Smyd1	3.99983	-0.0810128	9.37815	2.44e-08	3.28e-05	0.000201511	9.42383	2608	4092	-	6	71258190	71258190	+	-27.8961
13	NM_001005422	Stmnd1	2.09794	-5.23477	6.52248	3.99e-06	0.00120368	1.74665e-09	4.26038	778	26110	+	13	46299829	46299829	-	29.9886
14	NM_023814	Tbx18	1.28177	4.14971	5.28932	5.03e-05	0.00825925	1.26341e-09	1.50871	3200	3798	-	9	87727463	87727463	+	-25.0859
15	NM_023814	Tbx18	1.28177	4.14971	5.28932	5.03e-05	0.00825925	3.63761e-15	1.50871	3199	148165	-	9	87583096	87583096	+	-31.1592
16	NM_001101546	Tmem233	6.6964	-3.9114	7.48966	6.3e-07	0.00030921	3.49983e-05	6.18084	2433	3005	-	5	116080242	116080242	+	-32.871
17	NM_001289766	Zap70	-1.84224	-1.69841	-5.09204	7.68e-05	0.0110095	7.11714e-05	1.73205	24	50	+	1	36764563	36764563	+	-31.0002
