# Supplementary material for: Genome-Wide Analysis on Transcriptome and Methylome in Prevention of Mammary Tumor Induced by Early Life Combined Botanicals
Source: Cells. 2022 Dec 21;12(1):14. doi: 10.3390/cells12010014 (PMC9818885; doi:10.3390/cells12010014)
Supplement: Supplementary file 1 [file cells-12-00014-s001.zip › Supplementary File 3-Methylation level changes across two different mouse models.xlsx]

## Sheet: Table_S13_BSp_Her2+SV40_DMGs
S.No	Feature.name	Genes	Target.row	Distance.to.feature	Feature.strand	Chromosome	Start	End	Strand	pvalue	qvalue	Methylation.difference
1	NM_001024614	Cfap299	418	19327	+	5	98348629	98348629	-	2.76e-38	5.17e-36	-41.633
2	NM_001033041	Acmsd	25	-2629	+	1	127726784	127726784	-	4.97e-09	5.01e-08	25.896
3	NM_001164594	Pdzrn4	190	157658	+	15	92754765	92754765	-	5.04e-14	1.09e-12	30.322
4	NM_001168296	Ephb1	597	-26170	-	9	102380862	102380862	+	1.12e-72	1.08e-69	26.289
5	NM_001171011	Slc14a1	276	8257	-	18	78133863	78133863	+	4.92e-12	8.21e-11	30.999
6	NM_001177504	Gm6588	423	-19868	+	5	112429558	112429558	-	1.53e-15	4.08e-14	-26.246
7	NM_001206661	Tmem200c	245	-226051	+	17	68611085	68611085	-	2.18e-27	1.87e-25	28.793
8	NM_001206661	Tmem200c	246	-49526	+	17	68787610	68787610	+	1e-27	8.82e-26	-25.58
9	NM_001317350	Bub3	530	53315	+	7	131613807	131613807	-	1.73e-57	1.03e-54	-30.799
10	NM_008024	Foxl1	567	-3200	+	8	121124485	121124485	+	3.18e-13	6.23e-12	-28.693
11	NM_011010	Omp	526	766	-	7	98144682	98144682	-	1.49e-08	1.37e-07	-26.323
12	NM_011440	Sox14	594	31708	-	9	99844463	99844463	+	7.68e-13	1.43e-11	-26.352
13	NM_011650	Tsn	22	122771	-	1	118188362	118188362	-	3.3e-15	8.46e-14	-38.447
14	NM_011898	Spry4	269	943	-	18	38600326	38600326	-	1.17e-10	1.57e-09	-26.77
15	NM_016789	Nptx2	440	41386	+	5	144587271	144587271	+	1.92e-13	3.85e-12	37.1
16	NM_025791	Tmem223	281	-4528	+	19	8766468	8766468	-	1.99e-07	1.47e-06	26.35
17	NM_026789	Cfap57	379	8750	-	4	118611656	118611656	+	7.9e-64	5.68e-61	51.286
18	NM_027784	5530400C23Rik	480	-29353	+	6	133262863	133262863	-	7.09e-21	3.43e-19	28.718
19	NM_027784	5530400C23Rik	481	2022	+	6	133294236	133294236	+	2.81e-37	4.85e-35	29.294
20	NM_028033	Prr23a3	593	-372	+	9	98864395	98864395	-	2.3e-15	6.04e-14	26.294
21	NM_028296	Car10	75	40774	+	11	93140062	93140062	+	6.9e-14	1.46e-12	25.465
22	NM_028667	D3Ertd751e	332	1181636	+	3	42924252	42924252	-	7.31e-23	4.21e-21	-25.871
23	NM_028667	D3Ertd751e	331	677263	+	3	42419879	42419879	-	5.21e-08	4.33e-07	28.363
24	NM_032007	Mmp1b	573	-9278	-	9	7397303	7397303	-	2.89e-15	7.51e-14	26.645
25	NM_080465	Kcnn2	271	29902	+	18	45590054	45590054	+	1.58e-41	3.68e-39	27.91
26	NM_172586	Zfp322a	125	-26241	-	13	23395448	23395448	-	2.92e-10	3.66e-09	30
27	NM_172885	Tmem132d	433	203262	-	5	128229816	128229816	-	5.67e-40	1.16e-37	32.336
28	NM_175642	Adgrb3	2	12782	-	1	25816926	25816926	+	4.08e-09	4.18e-08	29.668
29	NM_175647	Dmrta1	374	1608	+	4	89689804	89689804	-	9.06e-19	3.55e-17	28.282
30	NM_177735	Tmem130	441	68405	-	5	144693174	144693174	-	1.15e-24	7.69e-23	-28.903
31	NM_198627	Vstm2l	315	-32565	+	2	157882088	157882088	+	1.78e-08	1.61e-07	25.062
32	NM_198958	Nox3	232	3016	-	17	3693246	3693246	-	1.81e-25	1.27e-23	-28.222
33	NM_207233	C1ql2	23	31206	+	1	120371786	120371786	+	9.98e-22	5.14e-20	-26.535

## Sheet: Table_S14_GTPs_Her2+SV40_DMGs
S.No	Feature.name	Genes	Target.row	Distance.to.feature	Feature.strand	Chromosome	Start	End	Strand	P.Value	q.value	Methylation.difference
1	NM_172890	Slc6a11	3396	27172	+	6	114158411	114158411	-	1.72e-18	5.2e-17	-29.105
2	NM_008783	Pbx1	248	188163	-	1	168244007	168244007	+	5.45e-05	0.000193	-28.995
3	NM_009290	Wnt8a	1940	7468	+	18	34549794	34549794	-	1.71e-07	1.09e-06	-28.958
4	NM_007994	Fbp2	1006	27448	-	13	62830923	62830923	-	1.57e-06	8.11e-06	-28.947
5	NM_011856	Tenm2	548	1817	-	11	36942425	36942425	+	9.6e-15	1.92e-13	-28.879
6	NM_016789	Nptx2	3213	11324	+	5	144557209	144557209	+	4.64e-07	2.69e-06	-28.805
7	NM_001081178	Adgrf5	1772	2518	+	17	43391982	43391982	-	1.39e-07	9.02e-07	-28.8
8	NM_008842	Pim1	1721	4630	+	17	29495673	29495673	-	2.62e-16	6.33e-15	-28.765
9	NM_008744	Ntn1	604	2486	-	11	68384341	68384341	+	1.37e-05	5.67e-05	-28.733
10	NM_177164	Vwc2l	95	66356	+	1	70792069	70792069	-	2.9e-08	2.15e-07	-28.655
11	NM_172868	Pakap	2747	-13518	+	4	57554730	57554730	+	1.27e-06	6.65e-06	-28.638
12	NM_027306	Zdhhc25	1403	-7081	+	15	88593221	88593221	+	8.79e-11	1.02e-09	-28.634
13	NM_177612	Ctnna3	378	-5002	+	10	63425096	63425096	+	4.93e-12	6.91e-11	-28.634
14	NM_001311108	Tmcc2	177	10446	-	1	132357503	132357503	+	2.48e-05	9.61e-05	-28.608
15	NM_033652	Lmx1a	247	314405	+	1	168003961	168003961	+	0.000169	0.000518	-28.554
16	NM_001199235	Sptbn4	3588	14420	-	7	27380087	27380087	+	1.16e-08	9.19e-08	-28.54
17	NM_009313	Tacr1	3353	15985	+	6	82418458	82418458	-	2.59e-06	1.27e-05	-28.495
18	NM_030166	Galnt15	1108	9233	+	14	32038334	32038334	+	1.13e-06	6.03e-06	-28.446
19	NM_001081133	Kif16b	2364	671006	-	2	142230459	142230459	+	7.86e-05	0.000265	-28.431
20	NM_008024	Foxl1	4039	-3200	+	8	121124485	121124485	+	2.79e-10	2.99e-09	-28.429
21	NM_026866	Disp1	285	10464	-	1	183211066	183211066	+	6.49e-13	1.03e-11	-28.401
22	NM_009822	Runx1t1	2680	24053	+	4	13808833	13808833	-	1.29e-06	6.79e-06	-28.4
23	NM_001290814	Aff3	44	11462	-	1	38615783	38615783	+	2.97e-17	7.88e-16	-28.379
24	NM_030614	Fgf16	4323	9285	+	X	105773760	105773760	+	2.49e-12	3.65e-11	-28.374
25	NM_007494	Ass1	2228	-26744	+	2	31443526	31443526	-	2.81e-09	2.51e-08	-28.301
26	NM_171824	Pgbd5	4047	70291	-	8	124363646	124363646	-	1.66e-19	5.53e-18	-28.269
27	NM_001102414	Slc2a9	2973	18322	-	5	38461985	38461985	-	3.97e-09	3.46e-08	-28.213
28	NM_001285459	Fmn1	2326	84120	+	2	113525182	113525182	-	2.73e-05	0.000104	-28.138
29	NM_019867	Ngef	119	5049	-	1	87505314	87505314	-	3.54e-07	2.1e-06	-28.08
30	NM_010133	En1	164	-1352	+	1	120601135	120601135	-	3.34e-08	2.44e-07	-27.985
31	NM_138751	Tmem47	4290	-9529	+	X	81061115	81061115	+	1.27e-06	6.67e-06	-27.902
32	NM_019573	Wwox	4002	9255	+	8	114448905	114448905	-	5.5e-08	3.86e-07	-27.854
33	NM_001244692	St18	5	29819	+	1	6517048	6517048	-	6.75e-14	1.22e-12	-27.848
34	NM_145746	Odf4	606	9316	-	11	68917766	68917766	-	3.44e-11	4.22e-10	-27.806
35	NM_001293559	Cox4i1	4038	2643	+	8	120670961	120670961	-	8.31e-08	5.64e-07	-27.804
36	NM_176920	Lrtm1	1103	-9	+	14	29018199	29018199	+	1.62e-60	6.38e-58	-27.793
37	NM_008082	Galr1	2066	117442	-	18	82289336	82289336	+	3.9e-05	0.000143	-27.718
38	NM_028547	Kif2b	653	-32964	-	11	91610518	91610518	+	5.73e-11	6.83e-10	-27.715
39	NM_025624	Pomp	3224	2008	+	5	147862634	147862634	-	1.71e-07	1.09e-06	-27.663
40	NM_010330	Emb	1078	-23341	+	13	117197232	117197232	-	7.89e-10	7.75e-09	-27.655
41	NM_026094	Atp8b3	405	20312	-	10	80518813	80518813	+	0.000322	0.000909	-27.592
42	NM_007390	Chrna7	3659	-32926	-	7	63245451	63245451	-	7.6e-11	8.92e-10	-27.562
43	NM_001005846	Mcoln2	2654	11074	+	3	146161246	146161246	-	1.62e-12	2.42e-11	-27.557
44	NM_175631	Cbln4	2460	-4038	-	2	172047503	172047503	+	1.88e-05	7.52e-05	-27.551
45	NM_053105	Klhl1	1196	-96142	-	14	96615175	96615175	+	1.32e-06	6.9e-06	-27.505
46	NM_009182	St8sia3	2003	-117013	+	18	64137346	64137346	-	1.73e-07	1.1e-06	-27.49
47	NM_010104	Edn1	944	-22071	+	13	42279405	42279405	+	1.85e-09	1.71e-08	-27.435
48	NM_021297	Tlr4	2756	-144837	+	4	66682714	66682714	-	9.04e-11	1.05e-09	-27.433
49	NM_001167921	Gtf2e2	3872	-10243	+	8	33721671	33721671	-	4.09e-14	7.59e-13	-27.428
50	NM_007567	Bsn	4185	10177	-	9	108180207	108180207	-	4.58e-12	6.45e-11	-27.413
51	NM_177470	Acaa2	2036	58278	+	18	74837488	74837488	-	9.05e-07	4.92e-06	-27.399
52	NM_133365	Dnah5	1293	-1615	+	15	28202151	28202151	-	2.73e-05	0.000104	-27.381
53	NM_001310652	Cldn34c1	4337	-209732	+	X	122893791	122893791	-	0.000222	0.00066	-27.378
54	NM_008105	Gcnt2	941	269	+	13	40887025	40887025	+	2.49e-14	4.75e-13	-27.311
55	NM_001317350	Bub3	3759	2986	+	7	131563478	131563478	+	8.69e-07	4.75e-06	-27.296
56	NM_001286857	Gpatch4	2557	5765	+	3	88048869	88048869	-	3.97e-17	1.04e-15	-27.261
57	NM_001310461	Cypt1	4241	-384923	+	X	16137946	16137946	+	1.72e-13	2.96e-12	-27.249
58	NM_178676	Entpd3	4213	-20245	+	9	120519573	120519573	-	8.12e-33	7.79e-31	-27.243
59	NM_010613	Khsrp	1806	9271	-	17	57022237	57022237	+	2.19e-43	3.82e-41	-27.207
60	NM_001112798	Slc8a1	1864	-62473	-	17	81800859	81800859	-	2.53e-16	6.12e-15	-27.2
61	NM_011348	Sema3e	2940	145290	+	5	14170564	14170564	-	6.83e-13	1.08e-11	-27.185
62	NM_001100444	Gm5934	4245	100095	-	X	24399069	24399069	-	8.49e-09	6.91e-08	-27.185
63	NM_023239	Nsmce3	3661	145597	-	7	64727444	64727444	-	3.95e-11	4.81e-10	-27.182
64	NM_026763	Col6a4	4179	31925	-	9	106064767	106064767	-	2.1e-08	1.59e-07	-27.173
65	NM_001081235	Mn1	3091	-22536	+	5	111395630	111395630	+	6.82e-22	2.84e-20	-27.099
66	NM_001172207	Lrtm2	3422	7340	-	6	119321865	119321865	-	4.23e-10	4.38e-09	-27.081
67	NM_138597	Atp5o	1643	40249	-	16	91891382	91891382	-	7.47e-09	6.14e-08	-27.067
68	NM_001278584	Pomc	736	-11992	+	12	3942953	3942953	-	1.61e-07	1.03e-06	-27.054
69	NM_001038676	Obox7	3570	290845	+	7	14950551	14950551	-	5.6e-13	8.97e-12	-27.051
70	NM_011084	Pik3c2g	3495	13884	+	6	139855327	139855327	+	5.59e-06	2.53e-05	-27.036
71	NM_001145015	Arhgap40	2400	24666	+	2	158537460	158537460	-	1.4e-07	9.08e-07	-26.987
72	NM_173744	Tdrp	3823	4447	-	8	13970331	13970331	+	6.96e-08	4.8e-07	-26.902
73	NM_015820	Hs6st3	1239	31765	+	14	119170028	119170028	-	1.7e-09	1.58e-08	-26.869
74	NM_029012	Sppl3	3108	19212	+	5	115030734	115030734	+	0.000135	0.000426	-26.847
75	NM_026321	Fam174a	137	-73815	+	1	95239813	95239813	-	2.89e-12	4.18e-11	-26.831
76	NM_008104	Gcm2	942	14553	-	13	41095436	41095436	-	4.88e-05	0.000175	-26.801
77	NM_001290627	Atp4a	3604	2343	+	7	30714550	30714550	+	0.000142	0.000444	-26.781
78	NM_001164112	Nfatc1	2056	1121	-	18	80707053	80707053	+	1.02e-13	1.8e-12	-26.772
79	NM_010666	Krt27	687	-1257	-	11	99352374	99352374	-	5.12e-16	1.19e-14	-26.76
80	NM_001276475	Scgb2b27	3611	9563	-	7	34004380	34004380	+	9.93e-11	1.14e-09	-26.756
81	NM_172910	Dlgap2	3824	83470	+	8	14179343	14179343	-	3.71e-22	1.6e-20	-26.748
82	NM_008229	Hdac2	338	-43061	+	10	36931483	36931483	+	4.73e-10	4.84e-09	-26.74
83	NM_001290627	Atp4a	3605	6070	+	7	30718277	30718277	-	7.97e-47	1.67e-44	-26.726
84	NM_145507	Dars	172	-39941	-	1	128457356	128457356	+	4.87e-06	2.25e-05	-26.67
85	NM_029012	Sppl3	3107	-4110	+	5	115007414	115007414	-	7.3e-08	5.02e-07	-26.645
86	NM_010406	Hc	2237	3301	-	2	35058141	35058141	-	5.81e-05	0.000204	-26.603
87	NM_028483	Cib4	2951	17159	-	5	30528678	30528678	+	1.25e-13	2.18e-12	-26.594
88	NM_001110274	Slc14a2	2050	-3209	-	18	78209648	78209648	-	2.57e-08	1.92e-07	-26.585
89	NM_025285	Stmn2	2481	45889	+	3	8555414	8555414	-	1.59e-29	1.22e-27	-26.578
90	NM_009330	Hnf1b	639	40	+	11	83850907	83850907	-	5.2e-12	7.24e-11	-26.562
91	NM_001271766	Gpr35	134	371	+	1	92975716	92975716	+	8.17e-07	4.49e-06	-26.562
92	NM_001145433	Smim20	2986	26144	+	5	53293248	53293248	-	2.68e-09	2.41e-08	-26.551
93	NM_001033979	Ldlrad2	2868	1992	-	4	137573189	137573189	-	4.04e-05	0.000148	-26.539
94	NM_022428	Irx6	3959	69368	+	8	92743655	92743655	+	4.07e-24	2.06e-22	-26.472
95	NM_153107	Cpz	2966	22490	-	5	35503137	35503137	-	3.45e-06	1.65e-05	-26.454
96	NM_027492	Naa30	1137	-49884	+	14	49122362	49122362	+	5.37e-08	3.78e-07	-26.442
97	NM_009147	Sec23a	781	47265	-	12	58964753	58964753	-	0.000156	0.000484	-26.433
98	NM_001244692	St18	6	100685	+	1	6587914	6587914	-	3.01e-08	2.22e-07	-26.407
99	NM_001326288	Naaladl2	2492	-175695	-	3	24959700	24959700	+	1.08e-05	4.57e-05	-26.407
100	NM_009510	Ezr	1672	5033	-	17	6777748	6777748	-	2.39e-08	1.79e-07	-26.402
101	NM_001288627	Emp1	3472	9158	+	6	135376649	135376649	+	4.9e-06	2.26e-05	-26.393
102	NM_020600	Rps14	1994	8349	+	18	60782943	60782943	-	6.1e-23	2.81e-21	-26.389
103	NM_207707	Esr2	805	48220	-	12	76129040	76129040	-	0.000213	0.000636	-26.385
104	NM_001305058	Spata19	4079	33715	+	9	27430925	27430925	+	2.25e-15	4.84e-14	-26.384
105	NM_007929	Emp2	1504	39155	-	16	10274814	10274814	+	2.34e-15	5.03e-14	-26.375
106	NM_026743	Tspan11	3451	3734	+	6	127891354	127891354	-	1.35e-05	5.6e-05	-26.357
107	NM_139272	Galnt2	4046	29042	+	8	124260434	124260434	-	2.8e-06	1.37e-05	-26.342
108	NM_148938	Slc1a3	1261	28058	-	15	8682750	8682750	-	3.92e-14	7.29e-13	-26.341
109	NM_028941	Cmip	4015	2663	+	8	117351831	117351831	+	0.000413	0.00113	-26.329
110	NM_080793	Setd7	2521	-11133	-	3	51571955	51571955	-	4.56e-22	1.95e-20	-26.31
111	NM_001033766	4930596D02Rik	1123	-116470	-	14	35928447	35928447	+	0.000235	0.000693	-26.278
112	NM_001081373	Cep164	4109	1203	-	9	45827436	45827436	+	3.66e-05	0.000135	-26.271
113	NM_001033547	Ccdc185	281	59212	-	1	182689969	182689969	-	6.81e-06	3.02e-05	-26.27
114	NM_011171	Procr	2391	2771	+	2	155753986	155753986	-	0.000252	0.000735	-26.267
115	NM_146135	Pias3	2576	-7241	+	3	96689134	96689134	-	2.03e-06	1.02e-05	-26.262
116	NM_001287015	Rnpc3	2597	-129124	-	3	113759272	113759272	+	2.33e-28	1.66e-26	-26.242
117	NM_015777	Igbp1b	3492	-53181	-	6	138711624	138711624	-	9.56e-28	6.49e-26	-26.214
118	NM_029620	Pcolce2	4163	1057	+	9	95638683	95638683	-	0.000482	0.00129	-26.211
119	NM_010293	Gykl1	1974	-20793	+	18	52672886	52672886	-	9.77e-09	7.88e-08	-26.205
120	NM_001301424	Slc7a1	3225	18179	-	5	148374637	148374637	+	6.91e-05	0.000237	-26.136
121	NM_027788	Fam83c	2392	-21887	-	2	155856740	155856740	+	3.8e-05	0.00014	-26.131
122	NM_008045	Fshb	2323	7479	-	2	107052173	107052173	-	4.93e-44	8.9e-42	-26.127
123	NM_001033978	H2-Eb2	1750	92	+	17	34325765	34325765	+	5.49e-05	0.000194	-26.107
124	NM_001286181	Lox	1973	24714	-	18	52505008	52505008	-	9.96e-80	6.87e-77	-26.105
125	NM_019998	Alg2	2730	27221	-	4	47447147	47447147	+	0.000193	0.000583	-26.104
126	NM_175432	Tmem132c	3155	2502	+	5	127244326	127244326	+	9.51e-11	1.1e-09	-26.095
127	NM_001004357	Cntnap2	3299	-313013	+	6	44747048	44747048	+	2.6e-05	0.0001	-26.095
128	NM_001293682	Ndst3	2611	-25968	-	3	123645417	123645417	-	3.88e-06	1.83e-05	-26.068
129	NM_027758	Tbc1d9	3935	-115774	+	8	83049578	83049578	-	0.000626	0.00163	-26.063
130	NM_146059	Ccdc166	1355	-658	-	15	75982942	75982942	-	1.09e-08	8.69e-08	-26.021
131	NM_026634	A930018P22Rik	2315	142338	+	2	104265105	104265105	-	0.000145	0.000455	-26.02
132	NM_028025	Mageb16	4289	-163782	-	X	79835216	79835216	+	3.35e-08	2.45e-07	-26.013
133	NM_001289762	Rarb	1085	-112582	-	14	16688057	16688057	-	0.00201	0.00442	-25.967
134	NM_022428	Irx6	3960	69595	+	8	92743882	92743882	+	5.79e-08	4.05e-07	-25.949
135	NM_009182	St8sia3	2002	-118681	+	18	64135678	64135678	-	3.23e-13	5.37e-12	-25.918
136	NM_001294278	Isx	3923	-737935	+	8	74135239	74135239	+	6.68e-53	1.93e-50	-25.91
137	NM_011117	Plec	1357	-3515	-	15	76234892	76234892	+	3.15e-07	1.89e-06	-25.904
138	NM_011510	Abcc8	3636	1044	-	7	46178990	46178990	-	7.35e-10	7.28e-09	-25.893
139	NM_029182	Rasd2	3924	-43881	+	8	75170063	75170063	+	3.81e-07	2.25e-06	-25.892
140	NM_153570	Noc4l	3087	16308	-	5	110637075	110637075	+	2.41e-06	1.19e-05	-25.87
141	NM_019737	B4galt6	1914	-61501	-	18	20807904	20807904	-	3.77e-24	1.91e-22	-25.855
142	NM_010252	Gabrg1	3006	-339	-	5	70842955	70842955	-	4.71e-09	4.03e-08	-25.844
143	NM_009147	Sec23a	780	66509	-	12	58945509	58945509	+	6.89e-10	6.86e-09	-25.789
144	NM_007811	Cyp26a1	2138	127211	+	19	37825017	37825017	-	0.000217	0.000647	-25.781
145	NM_013836	Tcf20	1387	-8927	-	15	82921060	82921060	+	5.89e-06	2.65e-05	-25.76
146	NM_028547	Kif2b	654	-482006	-	11	92059560	92059560	-	3.77e-10	3.95e-09	-25.746
147	NM_024219	Hsbp1	4028	-132283	+	8	119212255	119212255	+	2.17e-09	1.98e-08	-25.73
148	NM_022312	Tnr	224	38955	+	1	159562722	159562722	-	1.02e-21	4.16e-20	-25.711
149	NM_025696	Sorcs3	2164	521025	+	19	48727048	48727048	+	7.48e-50	1.85e-47	-25.669
150	NM_009918	Cnga3	38	-302	+	1	37218903	37218903	+	1.45e-17	4e-16	-25.654
151	NM_028231	Kcnmb2	2501	5382	+	3	31908083	31908083	+	2.39e-05	9.29e-05	-25.645
152	NM_013531	Gnb4	2502	-1110	-	3	32617644	32617644	+	5.17e-05	0.000184	-25.641
153	NM_145463	Shisa2	1148	142840	+	14	59768119	59768119	+	4.08e-07	2.39e-06	-25.632
154	NM_152824	Rbm17	2196	-9460	-	2	11612658	11612658	+	8.68e-16	1.96e-14	-25.611
155	NM_010759	Mageb1	4295	-184915	-	X	92201247	92201247	+	5.72e-07	3.25e-06	-25.601
156	NM_022722	Dpys	1304	15666	-	15	39841805	39841805	+	1.02e-07	6.81e-07	-25.6
157	NM_001005341	Ypel2	643	34123	-	11	86959640	86959640	+	2.31e-27	1.52e-25	-25.593
158	NM_198649	Ablim3	1996	28669	-	18	61883156	61883156	-	3.42e-07	2.04e-06	-25.589
159	NM_028892	Spag17	2582	-106382	+	3	99779035	99779035	-	6.35e-09	5.3e-08	-25.516
160	NM_019667	Stam2	2254	-48202	-	2	52790350	52790350	-	1.84e-17	4.99e-16	-25.512
161	NM_001163267	Cfap58	2161	4496	+	19	47942206	47942206	-	5.55e-16	1.29e-14	-25.473
162	NM_007855	Twist2	132	3349	+	1	91804808	91804808	-	0.00139	0.00322	-25.459
163	NM_001288627	Emp1	3471	5142	+	6	135372633	135372633	+	4.13e-06	1.93e-05	-25.438
164	NM_177906	Opcml	4080	229239	+	9	28020506	28020506	-	5.38e-10	5.46e-09	-25.415
165	NM_009910	Cxcr3	4310	28170	-	X	101705978	101705978	-	1.32e-17	3.65e-16	-25.405
166	NM_144854	Map3k7cl	1633	-7796	+	16	87545534	87545534	+	2.32e-07	1.43e-06	-25.396
167	NM_024219	Hsbp1	4031	-59626	+	8	119284912	119284912	+	3.93e-07	2.32e-06	-25.394
168	NM_175340	Nhlrc1	962	27716	-	13	46987135	46987135	-	1.68e-10	1.87e-09	-25.352
169	NM_146628	Olfr344	2244	35589	+	2	36604187	36604187	+	2.74e-28	1.93e-26	-25.352
170	NM_008493	Lep	3267	11684	+	6	29071903	29071903	+	3.42e-05	0.000127	-25.309
171	NM_011202	Ptpn11	3138	82225	-	5	121109173	121109173	-	7.93e-09	6.49e-08	-25.3
172	NM_001005232	Dbx1	3641	19905	-	7	49616931	49616931	+	4.84e-11	5.82e-10	-25.288
173	NM_172885	Tmem132d	3161	204914	-	5	128228164	128228164	+	3.45e-15	7.27e-14	-25.27
174	NM_146628	Olfr344	2243	35584	+	2	36604182	36604182	+	1.2e-23	5.82e-22	-25.254
175	NM_001081206	Dgki	3292	45458	-	6	37254519	37254519	-	0.000115	0.000371	-25.244
176	NM_172469	Clic6	1646	19876	+	16	92518021	92518021	-	1.11e-07	7.37e-07	-25.195
177	NM_022317	Slc28a3	998	20399	-	13	58590479	58590479	+	3.44e-15	7.26e-14	-25.182
178	NM_033652	Lmx1a	246	109721	+	1	167799277	167799277	-	1.2e-05	5.02e-05	-25.178
179	NM_009107	Rxrg	244	-14279	+	1	167584083	167584083	-	5.96e-11	7.09e-10	-25.163
180	NM_011923	Angptl2	2233	28340	+	2	33244299	33244299	+	3.68e-05	0.000136	-25.153
181	NM_022881	Rgs18	202	-613010	-	1	145388430	145388430	+	2.07e-09	1.9e-08	-25.139
182	NM_027897	Rhpn2	3619	24361	+	7	35358596	35358596	+	3.97e-07	2.33e-06	-25.136
183	NM_011347	Selp	235	13296	+	1	164128558	164128558	+	0.000374	0.00104	-25.118
184	NM_001136079	Ptger4	1255	26803	-	15	5217385	5217385	+	1.05e-11	1.4e-10	-25.11
185	NM_013833	Rax	2007	4350	-	18	65934740	65934740	-	7.94e-07	4.38e-06	-25.108
186	NM_178398	Wipi2	3207	19026	+	5	142648608	142648608	-	6.17e-08	4.29e-07	-25.107
187	NM_008132	Glrp1	122	5991	-	1	88504076	88504076	+	0.000182	0.000554	-25.1
188	NM_001113208	Ncam2	1623	147560	+	16	81348255	81348255	-	9.22e-14	1.64e-12	-25.091
189	NM_178703	Slc6a1	3398	48953	+	6	114331586	114331586	-	0.000255	0.000744	-25.089
190	NM_001317124	Hrh1	3400	22317	+	6	114480837	114480837	+	0.000831	0.00208	-25.087
191	NM_001276403	Lef1	2621	22452	+	3	131135241	131135241	+	2.5e-26	1.52e-24	-25.07
192	NM_001018031	Otol1	2538	61390	+	3	70069001	70069001	-	4.38e-10	4.51e-09	-25.039
193	NM_033593	Pcdhga10	1951	294	+	18	37747480	37747480	+	5.72e-09	4.82e-08	-25.037
194	NM_011446	Sox7	1154	-1232	+	14	63942474	63942474	-	3.02e-05	0.000114	-25.026
195	NM_010763	Man1a2	2584	-36418	-	3	100721890	100721890	-	5.01e-05	0.000179	-25.022
196	NM_009233	Sox1	3820	15654	+	8	12411171	12411171	-	3.99e-10	4.15e-09	-25.004
197	NM_010920	Nkx2-6	1162	-25290	+	14	69146512	69146512	+	5.24e-10	5.33e-09	25.014
198	NM_001126317	Gm1140	4277	219360	-	X	67474203	67474203	-	4.44e-06	2.07e-05	25.03
199	NM_175647	Dmrta1	2776	1608	+	4	89689804	89689804	-	6.2e-09	5.19e-08	25.146
200	NM_001310464	Reln	2948	-633	-	5	22345337	22345337	+	3.24e-10	3.43e-09	25.173
201	NM_008781	Pax3	109	55094	-	1	78142043	78142043	+	0.00295	0.00613	25.341
202	NM_007539	Bdkrb1	862	1340	+	12	105605429	105605429	+	5.06e-07	2.91e-06	25.463
203	NM_026267	Necap1	3431	9294	+	6	122883849	122883849	+	7.36e-05	0.000251	25.535
204	NM_008908	Ppic	1976	28366	-	18	53389642	53389642	+	9.15e-08	6.15e-07	25.585
205	NM_019430	Cacng3	3740	-101972	+	7	122569772	122569772	+	0.000261	0.000759	25.593
206	NM_001033041	Acmsd	171	-2629	+	1	127726784	127726784	-	5.68e-06	2.57e-05	25.992
207	NM_007563	Bpgm	3288	1453	+	6	34477807	34477807	-	1.65e-06	8.46e-06	26.092
208	NM_001302636	Phactr1	945	-78109	+	13	42788138	42788138	-	1.16e-10	1.32e-09	26.49
209	NM_001077510	Gnas	2468	21869	+	2	174351956	174351956	-	1.95e-08	1.49e-07	26.544
210	NM_022312	Tnr	225	82994	+	1	159606761	159606761	+	9.19e-07	4.99e-06	27.253
211	NM_030145	Lsm6	3928	-15344	-	8	78836495	78836495	+	3.09e-06	1.49e-05	27.317
212	NM_016789	Nptx2	3216	41386	+	5	144587271	144587271	+	1.85e-06	9.39e-06	27.357
213	NM_016968	Olig1	1640	-3340	+	16	91266429	91266429	-	2.75e-05	0.000105	27.502
214	NM_029393	Krt24	686	-8387	-	11	99293624	99293624	-	1.25e-14	2.48e-13	27.936
215	NM_026789	Cfap57	2821	8710	-	4	118611696	118611696	+	2.92e-14	5.51e-13	28.206
216	NM_013732	Cartpt	1054	100312	-	13	99800372	99800372	-	8.49e-06	3.67e-05	28.441
217	NM_001267846	Fign	2264	22878	-	2	64075161	64075161	-	1.37e-05	5.68e-05	28.483
218	NM_008591	Met	3253	81415	+	6	17545370	17545370	-	7.33e-11	8.62e-10	28.844
219	NM_007578	Cacna1a	3938	17811	+	8	84433173	84433173	-	2.25e-07	1.39e-06	29.153
220	NM_010954	Ncam2	1622	-270496	+	16	80930201	80930201	+	2.87e-46	5.8e-44	29.33
221	NM_001010937	Gjb6	1147	-101928	-	14	57235538	57235538	-	2.68e-09	2.4e-08	29.391
222	NM_177735	Tmem130	3217	47436	-	5	144714143	144714143	+	7.07e-06	3.12e-05	29.412
223	NM_008043	Frat1	2147	8707	+	19	41838675	41838675	+	2.08e-10	2.27e-09	29.516
224	NM_001033471	Cpxcr1	4333	-298930	+	X	116150014	116150014	+	3.54e-60	1.37e-57	29.562
225	NM_010817	Psmd7	3985	-54019	-	8	107642500	107642500	+	5.07e-14	9.29e-13	29.832
226	NM_172287	Spire2	4044	8377	+	8	123341088	123341088	-	5.24e-06	2.39e-05	29.849
227	NM_001081351	Cped1	3257	24808	+	6	22010716	22010716	-	0.000161	0.000498	29.879
228	NM_009237	Sox3	4273	16725	-	X	60876706	60876706	+	1.56e-08	1.21e-07	29.886
229	NM_015826	Dmrt1	2115	39705	+	19	25545409	25545409	-	1.48e-08	1.16e-07	30.104
230	NM_054055	Slc13a3	2427	8636	-	2	165464562	165464562	-	3.49e-13	5.79e-12	30.276
231	NM_175519	Kctd8	3002	438880	-	5	68902830	68902830	+	1.2e-06	6.35e-06	30.563
232	NM_001163566	Crb2	2246	17606	+	2	37793853	37793853	+	3.24e-08	2.38e-07	30.744
233	NM_007901	S1pr1	2600	-61124	-	3	115776178	115776178	+	4.34e-37	5.45e-35	30.765
234	NM_173436	Cypt2	4322	-36320	+	X	105463452	105463452	+	1.07e-17	2.99e-16	31.748
235	NM_001034102	Gm5800	1141	-20499	-	14	51737630	51737630	-	1.44e-07	9.29e-07	32.269
236	NM_026782	Ccdc167	1722	-73034	-	17	29790050	29790050	+	2.19e-35	2.48e-33	32.451
237	NM_001112798	Slc8a1	1863	-55462	-	17	81793848	81793848	-	6.43e-16	1.48e-14	32.799
238	NM_025696	Sorcs3	2162	155741	+	19	48361764	48361764	-	9.66e-06	4.13e-05	32.857
239	NM_016968	Olig1	1639	-3341	+	16	91266428	91266428	+	3.3e-08	2.42e-07	32.938
240	NM_010817	Psmd7	3983	-15754	-	8	107604235	107604235	+	1.95e-11	2.49e-10	33.401
241	NM_001171011	Slc14a1	2049	8257	-	18	78133863	78133863	+	2.59e-09	2.33e-08	33.746
242	NM_001305940	Arx	4297	-6664	+	X	93279843	93279843	-	9.84e-29	7.16e-27	34.348
243	NM_009527	Wnt7a	3377	10820	-	6	91400550	91400550	+	8.94e-15	1.8e-13	34.832
244	NM_053008	Olig3	320	-746	+	10	19355793	19355793	+	2.89e-06	1.41e-05	35.642
245	NM_001005422	Stmnd1	959	26110	+	13	46299829	46299829	-	1.03e-16	2.61e-15	35.653
246	NM_207233	C1ql2	162	-10822	+	1	120329760	120329760	+	1.41e-10	1.58e-09	37.671
247	NM_177735	Tmem130	3218	47402	-	5	144714177	144714177	+	7.1e-09	5.87e-08	38.308
248	NM_178591	Nrg1	3870	-23	-	8	31918225	31918225	+	7.94e-76	4.99e-73	38.336

## Sheet: Table_S15_Comb_Her2+SV40_DMGs
S.No	Feature.name	Genes	Target.row	Distance.to.feature	Feature.strand	Chromosome	Start	End	Strand	P.Value	q.value	Methylation.difference
1	NM_207233	C1ql2	133	-14357	+	1	120326225	120326225	+	1.97e-13	4.33e-12	25.842
2	NM_207233	C1ql2	134	33721	+	1	120374301	120374301	+	1.08e-05	5.58e-05	37.337
3	NM_010133	En1	136	-1352	+	1	120601135	120601135	-	8.87e-06	4.68e-05	-25.299
4	NM_021380	Il20	147	539	-	1	130910758	130910758	+	0.000107	0.000414	-26.19
5	NM_001081209	Prdm14	6	-32983	-	1	13160145	13160145	-	2.36e-12	4.42e-11	-26.264
6	NM_053106	Lmod1	159	391	+	1	135325202	135325202	+	7.69e-09	8e-08	33.242
7	NM_030676	Nr5a2	163	-76813	-	1	137037260	137037260	+	0.00156	0.00409	-26.861
8	NM_022312	Tnr	191	28053	+	1	159551820	159551820	+	9.11e-19	3.77e-17	-31.021
9	NM_022312	Tnr	192	82994	+	1	159606761	159606761	+	7.65e-07	5.2e-06	26.438
10	NM_008783	Pbx1	203	99912	-	1	168332258	168332258	+	1.72e-17	6.28e-16	40.99
11	NM_008783	Pbx1	204	99904	-	1	168332266	168332266	+	6.87e-10	8.71e-09	30.612
12	NM_033077	D1Pas1	228	20750	+	1	186988164	186988164	+	1.08e-09	1.32e-08	43.285
13	NM_001029878	Lonrf2	28	-47	-	1	38821261	38821261	+	3.36e-06	1.97e-05	-32.798
14	NM_001252200	Map4k4	32	34092	+	1	39935003	39935003	-	7.06e-10	8.92e-09	-31.149
15	NM_139146	Satb2	55	139329	-	1	56832006	56832006	-	9.79e-09	9.99e-08	-29.257
16	NM_001244692	St18	3	29354	+	1	6516583	6516583	-	5.17e-05	0.00022	-27.109
17	NM_001004173	Sgpp2	95	12807	+	1	78323151	78323151	+	3.46e-08	3.17e-07	-26.173
18	NM_029122	Iqca	111	36973	-	1	90116429	90116429	-	9.98e-11	1.45e-09	33.18
19	NM_001205098	Mgat4c	347	-166234	+	10	101515253	101515253	+	2.39e-24	1.65e-22	-31.884
20	NM_001205098	Mgat4c	348	-166233	+	10	101515254	101515254	-	1.43e-15	4.19e-14	-46.072
21	NM_001205098	Mgat4c	349	-50301	+	10	101631186	101631186	+	2.79e-28	2.49e-26	-36.033
22	NM_173391	Tph2	362	11263	-	10	115173760	115173760	-	1.2e-11	2.01e-10	28.725
23	NM_177793	Mettl24	275	98527	+	10	40781807	40781807	+	1.77e-10	2.47e-09	-40.042
24	NM_022027	Syne1	242	158067	-	10	4910997	4910997	+	2.06e-17	7.47e-16	-27.323
25	NM_019760	Serinc1	294	-36984	-	10	57569512	57569512	+	9.17e-20	4.17e-18	-32.794
26	NM_010959	Oit3	298	-6317	-	10	59448095	59448095	+	4.28e-09	4.69e-08	30.251
27	NM_133184	Slc5a4a	320	24553	+	10	76172002	76172002	-	1.32e-07	1.07e-06	25.978
28	NM_008777	Pah	333	84750	+	10	87606543	87606543	+	1.02e-20	5.1e-19	-43.324
29	NM_133199	Scn4a	554	-7465	-	11	106356854	106356854	-	6.46e-07	4.49e-06	-34.235
30	NM_027919	Tha1	576	-35973	-	11	117909498	117909498	-	1.26e-05	6.39e-05	32.565
31	NM_027919	Tha1	577	-36014	-	11	117909539	117909539	-	7.05e-08	6.05e-07	38.082
32	NM_001285438	Rbfox3	578	67901	-	11	118693141	118693141	-	6.95e-05	0.000286	25.819
33	NM_011856	Tenm2	437	64332	-	11	36879910	36879910	+	3e-08	2.78e-07	35.771
34	NM_011856	Tenm2	438	64301	-	11	36879941	36879941	+	7.19e-05	0.000294	28.64
35	NM_177709	Trarg1	493	20635	+	11	76700506	76700506	+	5.63e-16	1.73e-14	46.678
36	NM_001313922	Nos2	496	5956	+	11	78931245	78931245	+	5.47e-09	5.87e-08	35.073
37	NM_009324	Tbx2	508	1243	+	11	85833856	85833856	-	5.92e-66	3.13e-63	-25.526
38	NM_001168472	Dynll2	517	22841	-	11	87963745	87963745	-	5.08e-35	7.05e-33	27.427
39	NM_172534	Ankfn1	520	-87663	-	11	89506610	89506610	+	5.26e-17	1.83e-15	39.982
40	NM_028965	Snx11	536	41332	-	11	96736224	96736224	+	1.74e-07	1.37e-06	28.885
41	NM_028965	Snx11	537	41313	-	11	96736243	96736243	+	1.91e-07	1.49e-06	25.836
42	NM_010895	Neurod2	542	3195	-	11	98326451	98326451	-	1.1e-116	1.9e-113	47.149
43	NM_010895	Neurod2	543	3184	-	11	98326462	98326462	-	7.54e-62	3.45e-59	-32.364
44	NM_211355	Ppp4r3a	686	-14308	-	12	101098009	101098009	+	4.39e-15	1.19e-13	28.623
45	NM_001195726	Fam181a	694	2143	+	12	103317100	103317100	+	5.83e-11	8.81e-10	29.412
46	NM_007539	Bdkrb1	699	1340	+	12	105605429	105605429	+	2.66e-11	4.26e-10	28.141
47	NM_033522	Ferd3l	604	-121120	+	12	33807305	33807305	-	1.73e-15	4.95e-14	45.233
48	NM_001278584	Pomc	587	-23558	+	12	3931387	3931387	-	1.14e-08	1.15e-07	27.423
49	NM_001278584	Pomc	588	-11992	+	12	3942953	3942953	-	1.09e-09	1.33e-08	-28.206
50	NM_009147	Sec23a	627	158951	-	12	58853067	58853067	-	1.27e-11	2.12e-10	29.779
51	NM_009147	Sec23a	628	87900	-	12	58924118	58924118	-	4.58e-05	0.000198	26.419
52	NM_011384	Six6	636	11770	+	12	72951650	72951650	+	2.22e-13	4.85e-12	-45.597
53	NM_009189	Six1	637	4246	-	12	73042467	73042467	+	5.27e-07	3.73e-06	-32.091
54	NM_009189	Six1	638	-5206	-	12	73051917	73051917	-	4.06e-10	5.33e-09	-32.373
55	NM_001309808	Cox16	661	-284	-	12	81485420	81485420	-	1.83e-23	1.18e-21	-42.317
56	NM_001267625	Dpf3	664	176861	-	12	83310876	83310876	+	3.15e-08	2.91e-07	25.808
57	NM_001301427	Vsx2	668	1154	+	12	84570980	84570980	+	1.02e-08	1.03e-07	25.637
58	NM_021459	Isl1	881	588563	-	13	115721126	115721126	+	0.000198	0.000705	25.513
59	NM_021459	Isl1	882	8011	-	13	116301678	116301678	-	2.17e-10	2.99e-09	-33.612
60	NM_021459	Isl1	883	7954	-	13	116301735	116301735	-	2.36e-07	1.81e-06	-27.738
61	NM_010225	Foxf2	746	-2856	+	13	31622960	31622960	+	1.84e-12	3.5e-11	-32.265
62	NM_010225	Foxf2	747	-1759	+	13	31624057	31624057	-	1.54e-64	7.67e-62	-37.003
63	NM_001302636	Phactr1	762	-78109	+	13	42788138	42788138	-	3.81e-13	8.05e-12	26.708
64	NM_001005748	Phactr1	764	12252	+	13	43135089	43135089	+	1.34e-10	1.9e-09	-29.003
65	NM_001005422	Stmnd1	778	26110	+	13	46299829	46299829	-	1.22e-10	1.75e-09	29.989
66	NM_013846	Ror2	798	10832	-	13	53275278	53275278	+	5.73e-09	6.12e-08	-34.651
67	NM_009946	Cplx2	801	44293	+	13	54415640	54415640	+	3.51e-99	5.19e-96	-29.272
68	NM_001302373	Trpc7	811	67875	-	13	56827915	56827915	-	1.34e-08	1.33e-07	-39.715
69	NM_001166464	Spock1	814	230101	-	13	57678232	57678232	-	4.8e-44	1.07e-41	-28.401
70	NM_001166464	Spock1	815	39735	-	13	57868598	57868598	+	4.61e-11	7.06e-10	-32.546
71	NM_001166464	Spock1	816	39710	-	13	57868623	57868623	+	3.83e-12	6.93e-11	-28.729
72	NM_001166464	Spock1	817	7499	-	13	57900834	57900834	-	3.38e-05	0.000152	27.489
73	NM_026685	Tmem174	859	10567	-	13	98626844	98626844	+	5.62e-07	3.96e-06	-25.469
74	NM_026685	Tmem174	860	10459	-	13	98626952	98626952	-	1.23e-10	1.76e-09	-29.358
75	NM_026685	Tmem174	861	10452	-	13	98626959	98626959	-	5.62e-07	3.96e-06	-28.261
76	NM_007904	Ednrb	1005	27847	-	14	103815855	103815855	+	2.52e-07	1.92e-06	-29.778
77	NM_175499	Slitrk6	1013	43567	-	14	110711583	110711583	+	1.45e-12	2.8e-11	-36.5
78	NM_015820	Hs6st3	1027	112302	+	14	119250565	119250565	+	2.48e-08	2.34e-07	-30.147
79	NM_207667	Fgf14	1038	335	-	14	124676793	124676793	+	2.92e-08	2.71e-07	27.354
80	NM_001146022	Wdfy4	919	14478	-	14	33170589	33170589	+	4.61e-19	1.95e-17	27.552
81	NM_008166	Grid1	921	4822	+	14	34824956	34824956	-	2.9e-15	8.07e-14	-27.597
82	NM_026816	Gtf2f2	975	3031	-	14	76007835	76007835	+	3.74e-18	1.47e-16	32.471
83	NM_033612	Cela1	1206	8978	-	15	100678943	100678943	+	2.93e-07	2.19e-06	-31.62
84	NM_007583	Cacng2	1121	48679	-	15	78070602	78070602	-	1.53e-09	1.81e-08	-31.783
85	NM_020507	Tob2	1137	3237	-	15	81855090	81855090	+	5.26e-10	6.8e-09	-31.036
86	NM_020507	Tob2	1138	-1335	-	15	81859660	81859660	+	1.35e-07	1.09e-06	25.414
87	NM_020507	Tob2	1139	-1377	-	15	81859702	81859702	+	1.47e-09	1.74e-08	31.197
88	NM_027306	Zdhhc25	1157	20190	+	15	88620490	88620490	+	1.37e-05	6.9e-05	26.977
89	NM_001164594	Pdzrn4	1169	86208	+	15	92683315	92683315	+	2.69e-05	0.000124	-27.909
90	NM_001164594	Pdzrn4	1170	117408	+	15	92714515	92714515	+	7e-14	1.64e-12	-34.636
91	NM_001164594	Pdzrn4	1171	157468	+	15	92754575	92754575	+	1.18e-18	4.81e-17	-36.967
92	NM_021477	Rbfox1	1224	-20818	+	16	5863975	5863975	+	3.92e-15	1.07e-13	40.015
93	NM_183188	Rbfox1	1225	239	+	16	7070072	7070072	+	1.99e-10	2.76e-09	-41.389
94	NM_023380	Samsn1	1293	36855	-	16	75872412	75872412	-	4.83e-11	7.37e-10	-30.841
95	NM_001113208	Ncam2	1297	315529	+	16	81516224	81516224	+	3.88e-12	7.01e-11	-29.97
96	NM_029070	Tmem114	1227	28028	-	16	8397109	8397109	-	7.6e-07	5.17e-06	-25.48
97	NM_001145886	Tiam1	1306	736	-	16	89973964	89973964	+	4.14e-08	3.72e-07	29.085
98	NM_001025584	Kcnj6	1316	34751	-	16	94962946	94962946	-	1.45e-13	3.24e-12	-33.208
99	NM_001251881	Ggnbp1	1354	-8764	+	17	27009271	27009271	-	7.59e-07	5.16e-06	27.477
100	NM_030598	Rcan2	1397	654	+	17	43953843	43953843	+	2.56e-06	1.54e-05	32.729
101	NM_001290337	Prickle4	1410	1825	-	17	47692912	47692912	-	3.1e-05	0.000141	-25.541
102	NM_027452	Lrfn2	1412	82945	+	17	49015525	49015525	+	1.36e-07	1.1e-06	32.374
103	NM_027452	Lrfn2	1413	82967	+	17	49015547	49015547	+	1.4e-06	9.01e-06	33.927
104	NM_027787	Rfx2	1425	16415	-	17	56814594	56814594	+	4.18e-41	8.22e-39	25.795
105	NM_177278	L3mbtl4	1453	18729	+	17	68292524	68292524	+	3.09e-10	4.14e-09	-25.157
106	NM_177278	L3mbtl4	1454	18758	+	17	68292553	68292553	+	1.51e-07	1.21e-06	-25.606
107	NM_177278	L3mbtl4	1455	18889	+	17	68292684	68292684	-	1.67e-08	1.63e-07	-33.775
108	NM_001206661	Tmem200c	1456	-30239	+	17	68806897	68806897	-	7.34e-09	7.67e-08	-29.01
109	NM_027712	Dlgap1	1458	-122383	+	17	70302409	70302409	+	2.52e-07	1.92e-06	-28.648
110	NM_007439	Alk	1469	164037	-	17	72440271	72440271	-	8.03e-20	3.69e-18	-27.79
111	NM_001081416	Fndc1	1327	15980	-	17	7788995	7788995	-	2.38e-10	3.26e-09	-32.081
112	NM_010830	Msh6	1500	-46278	+	17	87928772	87928772	+	0.00057	0.00174	26.444
113	NM_026505	Bambi	1509	106765	+	18	3614720	3614720	+	6.76e-08	5.82e-07	25.692
114	NM_009959	Pcdha5	1539	459	+	18	36960897	36960897	+	2.52e-42	5.3e-40	44.518
115	NM_026505	Bambi	1510	193665	+	18	3701620	3701620	-	1.84e-10	2.56e-09	-40.698
116	NM_033576	Pcdhgb4	1543	889	+	18	37721441	37721441	+	1.43e-23	9.29e-22	-33.895
117	NM_033591	Pcdhga8	1544	1032	+	18	37726736	37726736	+	2.72e-138	7.42e-135	29.21
118	NM_033591	Pcdhga8	1545	1081	+	18	37726785	37726785	+	6.5e-200	3.74e-196	40.796
119	NM_033593	Pcdhga10	1546	-685	+	18	37746503	37746503	+	3.77e-07	2.76e-06	30.049
120	NM_033594	Pcdhga11	1547	1279	+	18	37757050	37757050	+	6.9e-21	3.51e-19	27.557
121	NM_029942	Prelid2	1557	33176	-	18	41918019	41918019	+	3.04e-28	2.71e-26	32.472
122	NM_001312905	Kcnn2	1564	70666	+	18	45339524	45339524	+	4.78e-12	8.51e-11	-41.498
123	NM_010181	Fbn2	1578	69175	-	18	58140752	58140752	-	6.03e-13	1.24e-11	32.725
124	NM_178928	Afap1l1	1585	1327	-	18	61785336	61785336	+	5.25e-29	4.91e-27	-38.561
125	NM_001039485	Piezo2	1587	91965	-	18	63295219	63295219	-	3.75e-13	7.94e-12	-31.895
126	NM_001172062	Lman1	1593	-10575	-	18	66013209	66013209	+	8.49e-12	1.46e-10	36.018
127	NM_001171011	Slc14a1	1615	8364	-	18	78133756	78133756	-	5.01e-09	5.42e-08	29.377
128	NM_001171011	Slc14a1	1616	8257	-	18	78133863	78133863	+	8.85e-10	1.1e-08	36.958
129	NM_008082	Galr1	1634	117442	-	18	82289336	82289336	+	9.82e-06	5.12e-05	-26.156
130	NM_001302951	Tle4	1664	645	-	19	14596569	14596569	-	6.13e-06	3.38e-05	-29.524
131	NM_001043354	Rorb	1672	2706	-	19	19108491	19108491	+	5.59e-14	1.32e-12	30.818
132	NM_010003	Cyp2c39	1697	-16125	+	19	39494697	39494697	-	9.89e-05	0.000388	-25.79
133	NM_010003	Cyp2c39	1698	40216	+	19	39551036	39551036	+	3.54e-06	2.07e-05	-31.096
134	NM_031396	Cnnm1	1708	31533	+	19	43471967	43471967	+	8.09e-13	1.63e-11	-32.877
135	NM_001163267	Cfap58	1716	1049	+	19	47938759	47938759	-	3.89e-10	5.13e-09	31.633
136	NM_025696	Sorcs3	1717	38038	+	19	48244061	48244061	-	1.36e-52	4.33e-50	41.195
137	NM_025696	Sorcs3	1718	454522	+	19	48660545	48660545	-	4.94e-06	2.78e-05	35.617
138	NM_025696	Sorcs3	1719	454545	+	19	48660568	48660568	-	5.71e-10	7.33e-09	42.214
139	NM_001081133	Kif16b	1896	926150	-	2	141975315	141975315	-	5.8e-05	0.000244	30.355
140	NM_001081133	Kif16b	1897	671006	-	2	142230459	142230459	+	3.96e-05	0.000174	-26.05
141	NM_020595	Otor	1898	16819	+	2	143095309	143095309	-	9.46e-10	1.17e-08	-25.06
142	NM_001037247	Defb36	1908	4019	+	2	152608344	152608344	-	4.17e-13	8.78e-12	-26.366
143	NM_198627	Vstm2l	1919	-32565	+	2	157882088	157882088	+	2.01e-18	8.08e-17	45.538
144	NM_198627	Vstm2l	1920	-32429	+	2	157882224	157882224	-	5.36e-05	0.000228	29.903
145	NM_130451	Slc2a10	1941	39594	+	2	165543489	165543489	+	3.9e-20	1.84e-18	-51.449
146	NM_001271963	Eya2	1942	-32119	+	2	165562909	165562909	+	4.45e-15	1.21e-13	-29.007
147	NM_019498	Olfm1	1768	55016	+	2	28260703	28260703	-	6.75e-05	0.000279	30.144
148	NM_022415	Ptges	1774	28481	-	2	30874817	30874817	-	3.33e-10	4.44e-09	34.868
149	NM_007494	Ass1	1775	-26757	+	2	31443513	31443513	-	3.16e-11	4.98e-10	39.714
150	NM_001252547	Sh2d3c	1776	-1202	+	2	32726487	32726487	+	2.06e-08	1.97e-07	-30.48
151	NM_001083126	Lhx6	1778	6446	-	2	36097615	36097615	+	9.22e-08	7.74e-07	-39.406
152	NM_001083126	Lhx6	1779	6409	-	2	36097652	36097652	+	1.51e-10	2.13e-09	-44.628
153	NM_001267846	Fign	1806	22878	-	2	64075161	64075161	-	3.42e-06	2.01e-05	30.536
154	NM_010054	Dlx2	1815	2577	-	2	71544178	71544178	+	4.01e-07	2.91e-06	-31.843
155	NM_010054	Dlx2	1816	-19891	-	2	71566644	71566644	-	9.19e-06	4.83e-05	-35.217
156	NM_001163328	Ralyl	1987	-682979	+	3	12788676	12788676	-	3.59e-08	3.28e-07	47.644
157	NM_013920	Hnf4g	1980	-391099	+	3	3116931	3116931	+	5.77e-07	4.05e-06	-26.667
158	NM_028667	D3Ertd751e	2016	677263	+	3	42419879	42419879	-	0.000184	0.000661	26.136
159	NM_028667	D3Ertd751e	2017	1342194	+	3	43084810	43084810	-	6.59e-13	1.35e-11	-28.425
160	NM_001004176	Maml3	2021	151202	-	3	51953805	51953805	+	2.62e-09	2.97e-08	-28.817
161	NM_001004176	Maml3	2022	101633	-	3	52003374	52003374	+	9.78e-07	6.5e-06	-31.998
162	NM_001081137	Sis	2038	204412	-	3	72762455	72762455	-	1.09e-32	1.3e-30	-33.521
163	NM_001253719	Fstl5	2040	475546	+	3	76551127	76551127	+	2.78e-12	5.15e-11	-29.138
164	NM_013605	Muc1	2051	7934	+	3	89236988	89236988	-	1.4e-09	1.67e-08	-32.085
165	NM_027665	Adam30	2066	-10595	+	3	98150039	98150039	-	1.56e-19	6.95e-18	36.067
166	NM_198037	Cachd1	2207	127160	+	4	100903837	100903837	-	3.84e-09	4.24e-08	-34.97
167	NM_028513	Actrt2	2306	-73758	-	4	154741624	154741624	-	2.45e-13	5.31e-12	-42.428
168	NM_026293	Spaca1	2145	-64484	-	4	34114550	34114550	+	1.58e-05	7.81e-05	27.57
169	NM_010637	Klf4	2177	9320	-	4	55523156	55523156	-	0.000612	0.00185	-27.226
170	NM_021297	Tlr4	2182	-144837	+	4	66682714	66682714	-	2.75e-11	4.38e-10	-29.314
171	NM_019967	Brinp1	2183	293553	-	4	68660845	68660845	+	0.000493	0.00154	-25.031
172	NM_175647	Dmrta1	2198	1387	+	4	89689583	89689583	-	3.88e-11	6.03e-10	25.341
173	NM_175647	Dmrta1	2199	1608	+	4	89689804	89689804	-	3.79e-09	4.19e-08	27.625
174	NM_144955	Nkx6-1	2401	-2584	-	5	101667294	101667294	+	6.2e-09	6.58e-08	32.465
175	NM_001204233	Spp1	2404	320	+	5	104436510	104436510	+	1.72e-09	2.02e-08	-25.976
176	NM_001309526	Sgsm1	2424	-5058	-	5	113285658	113285658	+	1.46e-13	3.27e-12	-53.577
177	NM_001081308	Taok3	2440	-2302	+	5	117131286	117131286	+	5.75e-24	3.89e-22	26.6
178	NM_175520	Hcar1	2464	-6610	-	5	123886629	123886629	+	8.92e-19	3.69e-17	30.513
179	NM_021430	Rilpl1	2465	1123	-	5	124530269	124530269	+	0.000113	0.000433	25.75
180	NM_001190352	Tmem132b	2468	54203	+	5	125586619	125586619	+	3.65e-07	2.69e-06	30.844
181	NM_175432	Tmem132c	2473	2502	+	5	127244326	127244326	+	6.58e-13	1.35e-11	-27.297
182	NM_008871	Serpine1	2503	12304	-	5	137059969	137059969	-	4.35e-07	3.14e-06	-26.415
183	NM_173405	Amz1	2504	-767	+	5	140723360	140723360	-	2.06e-07	1.6e-06	28.456
184	NM_011348	Sema3e	2315	91313	+	5	14116587	14116587	+	5.63e-59	2.33e-56	-25.965
185	NM_016789	Nptx2	2516	11338	+	5	144557223	144557223	+	2.78e-07	2.09e-06	-33.933
186	NM_017396	Cyp3a41a	2518	-5623	-	5	145725758	145725758	+	1.28e-20	6.28e-19	29.733
187	NM_030727	Slc26a5	2321	-103735	-	5	21969338	21969338	+	2.73e-07	2.06e-06	-32.959
188	NM_010075	Dpp6	2326	-100260	+	5	26717097	26717097	-	3.39e-09	3.77e-08	25.494
189	NM_001136060	Dpp6	2327	-103153	+	5	27158782	27158782	+	2.99e-11	4.73e-10	-42.303
190	NM_011320	Nkx1-1	2333	-77921	-	5	33512010	33512010	-	1.14e-07	9.33e-07	26.07
191	NM_011320	Nkx1-1	2334	-94600	-	5	33528689	33528689	-	7.46e-06	4.01e-05	-28.333
192	NM_011320	Nkx1-1	2335	-94634	-	5	33528723	33528723	-	0.000133	0.0005	-29.363
193	NM_001199244	Kcnip4	2347	189602	-	5	49096058	49096058	-	4.55e-18	1.77e-16	-31.126
194	NM_001199244	Kcnip4	2348	61449	-	5	49224211	49224211	-	3.63e-32	4.14e-30	-26.888
195	NM_177006	Nwd2	2355	18467	+	5	63667568	63667568	+	3.8e-35	5.35e-33	-64.284
196	NM_145146	Afm	2384	-14028	+	5	90504921	90504921	+	1.96e-06	1.22e-05	26.472
197	NM_181850	Grm3	2314	36978	-	5	9688375	9688375	+	2.3e-06	1.4e-05	-26.564
198	NM_026743	Tspan11	2692	3734	+	6	127891354	127891354	-	9.01e-19	3.73e-17	-53.023
199	NM_207023	Tas2r120	2700	15209	+	6	132672164	132672164	+	9.62e-23	5.86e-21	-34.47
200	NM_007563	Bpgm	2565	1453	+	6	34477807	34477807	-	0.000299	0.001	25.549
201	NM_203491	Chrm2	2567	-97990	+	6	36290094	36290094	-	7.05e-15	1.86e-13	-27.783
202	NM_010451	Hoxa2	2593	1445	-	6	52163387	52163387	-	1.83e-47	4.86e-45	36.793
203	NM_178608	Reep1	2611	-24063	+	6	71683618	71683618	+	1.22e-16	4.05e-15	-33.189
204	NM_009527	Wnt7a	2639	10820	-	6	91400550	91400550	+	8.13e-10	1.01e-08	27.394
205	NM_001190381	Olfr596	2873	-8124	+	7	103301599	103301599	-	0.000185	0.000664	27.489
206	NM_029660	Rbmxl2	2876	46410	+	7	107255853	107255853	-	8.39e-19	3.49e-17	-37.159
207	NM_145584	Spon1	2882	-9391	+	7	113756607	113756607	-	1.19e-06	7.79e-06	-28.996
208	NM_019430	Cacng3	2889	-101972	+	7	122569772	122569772	+	0.000625	0.00188	25.593
209	NM_019430	Cacng3	2890	-94779	+	7	122576965	122576965	-	4.41e-05	0.000192	-25.088
210	NM_019430	Cacng3	2891	-44064	+	7	122627680	122627680	-	4.22e-12	7.57e-11	-30.696
211	NM_007400	Adam12	2907	-42301	-	7	134267397	134267397	-	2.91e-08	2.71e-07	25.852
212	NM_183289	Tcerg1l	2915	19837	-	7	138377894	138377894	+	1.65e-05	8.08e-05	-31.922
213	NM_001081115	Nccrp1	2794	2383	-	7	28544872	28544872	+	2.31e-08	2.19e-07	25.776
214	NM_001309388	Zfp141	2820	26344	-	7	42479410	42479410	+	8.37e-14	1.93e-12	-43.101
215	NM_001190374	Adamtsl3	2858	61874	+	7	82397566	82397566	-	3.57e-11	5.59e-10	29.222
216	NM_010817	Psmd7	3069	-15754	-	8	107604235	107604235	+	5.53e-07	3.9e-06	26.874
217	NM_010817	Psmd7	3070	-15957	-	8	107604438	107604438	-	3.01e-08	2.79e-07	-28.56
218	NM_010817	Psmd7	3071	-20448	-	8	107608929	107608929	-	2.18e-19	9.56e-18	48.325
219	NM_172285	Plcg2	3100	-4299	+	8	117493976	117493976	-	2.53e-09	2.89e-08	25.086
220	NM_024219	Hsbp1	3104	-59662	+	8	119284876	119284876	+	5.19e-18	2e-16	-39.528
221	NM_008320	Irf8	3106	-4207	+	8	120732151	120732151	-	9.29e-13	1.86e-11	35.178
222	NM_008320	Irf8	3107	-4187	+	8	120732171	120732171	-	5.56e-12	9.81e-11	28.612
223	NM_016738	Rpl13	3111	-5842	+	8	123096508	123096508	-	9.52e-32	1.05e-29	-29.663
224	NM_172287	Spire2	3112	8377	+	8	123341088	123341088	-	1.57e-06	1e-05	32.231
225	NM_171824	Pgbd5	3115	70291	-	8	124363646	124363646	-	1.08e-17	4.06e-16	-25.766
226	NM_172910	Dlgap2	2947	83470	+	8	14179343	14179343	-	1.38e-21	7.42e-20	-25.583
227	NM_153135	Unc5d	2976	235735	-	8	28983902	28983902	+	7.12e-34	9.2e-32	-43.201
228	NM_153135	Unc5d	2977	173479	-	8	29046158	29046158	+	1.72e-06	1.08e-05	26.031
229	NM_153135	Unc5d	2978	140948	-	8	29078689	29078689	+	9.15e-16	2.75e-14	-46.846
230	NM_030145	Lsm6	3031	-15344	-	8	78836495	78836495	+	1.53e-06	9.77e-06	28.399
231	NM_007578	Cacna1a	3037	33088	+	8	84448450	84448450	-	2.51e-08	2.36e-07	26.999
232	NM_001301137	Irx6	3052	-157281	+	8	92517008	92517008	-	1.97e-19	8.67e-18	-41.09
233	NM_173446	Fam155a	2930	90837	-	8	9680187	9680187	+	1.52e-22	9.02e-21	-25.679
234	NM_146227	Prss50	3233	10201	+	9	110868166	110868166	+	1.24e-08	1.24e-07	30.208
235	NM_146227	Prss50	3234	10235	+	9	110868200	110868200	+	6.75e-28	5.89e-26	58.075
236	NM_146227	Prss50	3235	10421	+	9	110868386	110868386	-	2.82e-18	1.12e-16	44.787
237	NM_028638	Gadl1	3243	4914	+	9	115914367	115914367	-	1.97e-08	1.89e-07	26.529
238	NM_008614	Mobp	3253	30924	+	9	120180664	120180664	+	4.01e-06	2.31e-05	-26.71
239	NM_023277	Jam3	3137	-55132	-	9	27210552	27210552	+	1.44e-15	4.2e-14	-25.12
240	NM_177906	Opcml	3138	229482	+	9	28020749	28020749	-	8.87e-10	1.1e-08	39.262
241	NM_009692	Apoa1	3162	-22218	+	9	46206412	46206412	+	3.09e-09	3.47e-08	-32.392
242	NM_001033535	Tnfaip8l3	3172	32829	-	9	54035583	54035583	-	0.000547	0.00168	27.083
243	NM_001033535	Tnfaip8l3	3173	19335	-	9	54049077	54049077	-	2.79e-12	5.17e-11	30.54
244	NM_001163758	Skor1	3184	-48404	-	9	63197364	63197364	+	5.21e-16	1.61e-14	-29.682
245	NM_023814	Tbx18	3199	148165	-	9	87583096	87583096	+	1.08e-16	3.64e-15	-31.159
246	NM_023814	Tbx18	3200	3798	-	9	87727463	87727463	+	8.58e-11	1.26e-09	-25.086
247	NM_028033	Prr23a3	3217	-372	+	9	98864395	98864395	-	7.64e-13	1.54e-11	28.443
248	NM_012020	Foxl2	3218	8979	+	9	98964584	98964584	-	1.13e-12	2.21e-11	-26.924
249	NM_009910	Cxcr3	3323	28170	-	X	101705978	101705978	-	7.84e-23	4.81e-21	-29.153
250	NM_001290478	Klhl4	3336	-248840	+	X	114225493	114225493	+	1.29e-12	2.52e-11	29.607
251	NM_001142750	Tgif2lx2	3338	-539372	+	X	117887855	117887855	-	2.84e-07	2.13e-06	-34.952
252	NM_001310652	Cldn34c1	3342	-60367	+	X	123043156	123043156	+	2.53e-70	1.64e-67	32.602
253	NM_172493	Diaph2	3343	711201	+	X	130460941	130460941	-	2.78e-24	1.91e-22	-44.98
254	NM_027952	Tcp11x2	3346	15740	-	X	135678051	135678051	+	1.77e-32	2.08e-30	29.546
255	NM_030688	Il1rapl2	3351	-146315	+	X	137424439	137424439	-	2.01e-05	9.59e-05	29.087
256	NM_030688	Il1rapl2	3352	3485	+	X	137574237	137574237	+	3.49e-16	1.1e-14	25.904
257	NM_008312	Htr2c	3357	-2363	+	X	146960150	146960150	+	6.76e-08	5.82e-07	27.595
258	NM_001168600	Gnl3l	3358	51104	-	X	150966190	150966190	+	3.1e-17	1.1e-15	-46.447
259	NM_001310461	Cypt1	3268	-384923	+	X	16137946	16137946	+	8.15e-10	1.02e-08	-25.035
260	NM_001313746	Fundc1	3269	839	-	X	17571169	17571169	+	1.78e-19	7.88e-18	38.898
261	NM_001313746	Fundc1	3270	643	-	X	17571365	17571365	-	4.57e-06	2.6e-05	30.917
262	NM_009237	Sox3	3288	16725	-	X	60876706	60876706	+	3.25e-14	7.91e-13	41.42
263	NM_001305940	Arx	3312	-36466	+	X	93250041	93250041	+	2.87e-19	1.24e-17	25.151
264	NM_001305940	Arx	3313	-1883	+	X	93284624	93284624	+	2.36e-08	2.23e-07	26.136
265	NM_008179	Gspt2	3315	1759	+	X	94637826	94637826	+	3.94e-11	6.1e-10	-48.06
266	NM_178753	Spin4	3318	-9059	-	X	95035740	95035740	-	1.86e-10	2.59e-09	-28.264
